# Supplementary material for: Dual transcriptome of the immediate neutrophil and Candida albicans interplay
Source: BMC Genomics. 2017 Sep 6;18:696. doi: 10.1186/s12864-017-4097-4 (PMC5585943; doi:10.1186/s12864-017-4097-4)
Supplement: Supplementary file 8 — Differential gene expression analysis of Candida. Comprehensive gene expression analysis table of neutrophil-or NET-treated Candida cells in yeast form (A) and in hyphae form (B). Respectively to the form, each condition was tested against the unchallenged, but adjusted fungal cell controls. Union of all 797 DEGs in Candida cells (C). (XLSX 4321 kb) [file 12864_2017_4097_MOESM8_ESM.xlsx]

## Sheet: STable_4A
Gene description			15' after PMN infection [yeast form]					30' after PMN infection [yeast form]					60' after PMN infection [yeast form]					30' after NET incubation [yeast form]
Gene_ID	Alias_ID	Description	Fold change [log2]	CPM [log2]	P-value	FDR	DE	Fold change [log2]	CPM [log2]	P-value	FDR	DE	Fold change [log2]	CPM [log2]	P-value	FDR	DE	Fold change [log2]	CPM [log2]	P-value	FDR	DE
orf19.10	ALK8	Alkane-inducible cytochrome P450; catalyzes hydroxylation of lauric acid to hydroxylauric acid; overproduction causes fluconazole resistance in WT and causes multidrug resistance in a cdr1 cdr2 double mutant; rat catheter biofilm repressed	1.11878	2.33305	0.0117674	0.0378876	false	0.393166	1.95733	0.424128	> 0.05	false	1.13879	2.47792	0.00685979	0.0159044	false	0.837384	0.162776	0.147695	0.0159044	false
orf19.100		Alpha/beta hydrolase and lipase domain protein; Hap43-repressed; Spider and flow model biofilm induced	-0.580802	5.82167	0.304137	> 0.05	false	-0.963711	5.75194	0.0856998	> 0.05	false	-1.31209	5.70333	0.0225933	0.0448503	false	0.967847	3.71624	0.00123877	0.0109842	false
orf19.1002		Protein of unknown function; Hap43-repressed gene	0.200133	5.06554	0.491691	> 0.05	false	-0.14258	4.96316	0.637163	> 0.05	false	-0.155212	5.01632	0.60433	> 0.05	false	-0.00908671	4.69823	0.979189	> 0.05	false
orf19.1005		Protein with predicted RNI-like domains; rat catheter biofilm induced	2.05524	1.36811	0.000252587	0.00144983	false	1.92238	1.35489	0.000829467	0.00314077	false	2.63874	1.97501	9.3005e-08	6.00346e-07	false	0.86142	-0.34212	0.229167	> 0.05	false
orf19.1007	KCS1	Putative bZIP transcription factor; Spider biofilm induced	-0.79817	5.29593	0.00631717	0.0226467	false	-0.752132	5.38366	0.00846808	0.0231985	false	-0.484379	5.55012	0.0946517	> 0.05	false	-0.102938	5.25487	0.700939	> 0.05	false
orf19.1008		Ortholog of Candida albicans WO-1 : CAWG_01856	6.8381	0.109991	9.54728e-07	1.16144e-05	false	7.06763	0.288051	6.27198e-06	4.15309e-05	false	8.10057	1.25128	1.88145e-11	2.14453e-10	false	3.0423	-0.814263	0.00192318	0.0155817	false
orf19.1009		Ortholog of Candida albicans WO-1 : CAWG_01857	3.7176	-0.364696	0.000928432	0.00449911	false	3.85094	-0.207383	0.000672499	0.00261166	false	4.64069	0.440781	9.64591e-07	5.25053e-06	false	1.35528	-1.37729	0.271747	5.25053e-06	false
orf19.101	RIM9	Protein required for alkaline pH response via the Rim101 signaling pathway; ortholog of S. cerevisiae Rim9 and A. nidulans palI; Spider biofilm induced	-1.94533	5.88739	0.00687428	0.024176	false	-2.07885	5.93099	0.0039995	0.0121497	true	-2.65179	5.89858	0.00034882	0.0011346	true	1.09462	4.21618	0.000195199	0.00236652	false
orf19.1010	MNT3	Mannosyltransferase; transcription elevated in cyr1, chk1, nik1, and sln1 homozygous null mutants; fungal-specific (no human or murine homolog)	-0.517401	4.99011	0.0838428	> 0.05	false	-0.523445	5.05819	0.0703315	> 0.05	false	-0.635988	5.07196	0.0284852	> 0.05	false	0.226513	4.84161	0.394155	> 0.05	false
orf19.1011	MNN21	Ortholog(s) have alpha-1,2-mannosyltransferase activity, role in protein glycosylation and Golgi apparatus localization	-0.747529	6.90544	0.0107345	0.0350872	false	-0.795501	6.9596	0.0046706	0.0139096	false	-1.0843	6.9191	0.000169633	0.000593761	false	-0.0382242	6.36861	0.886314	0.000593761	false
orf19.1012		Ortholog(s) have clathrin binding activity, role in Golgi to vacuole transport, endosomal transport and AP-1 adaptor complex, cytosol, endosome, nucleus localization	0.176642	6.58713	0.527046	> 0.05	false	0.160085	6.6508	0.570087	> 0.05	false	-0.216965	6.52221	0.439711	> 0.05	false	0.244571	6.40144	0.352966	> 0.05	false
orf19.102		Ortholog(s) have translation regulator activity, role in regulation of translation and mitochondrion localization	-0.701846	4.53625	0.0256913	> 0.05	false	-0.223459	4.81047	0.450497	> 0.05	false	0.199891	5.08218	0.485917	> 0.05	false	-0.453795	5.55961	0.0761679	> 0.05	false
orf19.1026		Ortholog(s) have role in exonucleolytic trimming to generate mature 3'-end of 5.8S rRNA from tricistronic rRNA transcript (SSU-rRNA, 5.8S rRNA and LSU-rRNA), more	0.019063	4.56107	0.972953	> 0.05	false	0.0208093	4.63335	0.966343	> 0.05	false	0.402489	4.8985	0.208043	> 0.05	false	-1.17923	5.91499	0.000110753	0.00149369	false
orf19.1026.1		Ortholog of C. parapsilosis CDC317 : CPAR2_105090, Candida tenuis NRRL Y-1498 : CANTEDRAFT_106351, Debaryomyces hansenii CBS767 : DEHA2A09548g and Candida dubliniensis CD36 : CD36_03580	0.556883	3.0249	0.165382	> 0.05	false	0.779503	3.23456	0.0538786	> 0.05	false	0.864277	3.34806	0.024094	0.0473779	false	-0.70941	3.69655	0.0228197	0.0473779	false
orf19.1027	PDR16	Phosphatidylinositol transfer protein; induction correlates with CDR1, CDR2 overexpression/azole resistance; fluphenazine, 17-beta-estradiol, ethynyl estradiol, NO induced; farnesol-downregulated in biofilm; rat catheter biofilm induced	-1.55175	5.08424	2.64921e-07	3.86541e-06	false	-0.975288	5.32599	0.000943722	0.0035018	false	-0.83055	5.43698	0.00402623	0.00999513	false	0.540352	4.10681	0.0657514	0.00999513	false
orf19.1028	ELA1	Elongin A; F-box protein; ubiquitin-protein ligase; role in protein ubiquitination and ubiquitin-dependent protein catabolism; rat catheter biofilm induced	1.26164	3.54894	0.00125873	0.00576825	false	1.87757	4.08216	6.04818e-07	5.37007e-06	false	1.70631	4.00736	1.87746e-06	9.68205e-06	false	0.192515	4.35877	0.512328	9.68205e-06	false
orf19.1029	RPP1	Putative ortholog of S. cerevisiae Rpp1; subunit of both RNase MRP and nuclear RNase P; rat catheter and Spider biofilm induced	0.792732	3.19976	0.0407233	> 0.05	false	0.857683	3.31583	0.0295015	> 0.05	false	1.5681	3.86528	5.05309e-06	2.38965e-05	false	-1.37623	4.87169	0.00010015	0.00137975	false
orf19.103	KAR5	Ortholog of S. cerevisiae Kar5; involved in nuclear membrane fusion during karyogamy; induced by alpha factor	0.130978	2.47952	0.758255	> 0.05	false	0.476747	2.7418	0.258609	> 0.05	false	0.458655	2.78946	0.248868	> 0.05	false	0.34277	2.18253	0.361812	> 0.05	false
orf19.1030		Putative peptidyl-prolyl cis-trans isomerase	0.816664	5.42782	0.092021	> 0.05	false	0.59641	5.36325	0.215178	> 0.05	false	2.17117	6.55554	1.61109e-05	6.86876e-05	true	-2.27808	8.23464	1.99724e-06	6.46485e-05	true
orf19.1031	HMG1	HMG-CoA reductase; enzyme of sterol pathway; inhibited by lovastatin; gene not transcriptionally regulated in response to lovastatin and fluconazole	-0.974208	7.56121	0.00143724	0.00646659	false	-1.00813	7.6219	0.00070809	0.00272934	false	-0.622586	7.82091	0.0484327	> 0.05	false	-0.56124	8.65216	0.0417907	> 0.05	false
orf19.1032	SKO1	bZIP transcription factor; involved in cell wall damage response; represses the yeast-to-hypha transition; mutants are caspofungin sensitive; induced by osmotic stress via Hog1; induced by Mnl1 under weak acid stress	0.057866	5.69623	0.855401	> 0.05	false	0.356996	5.92952	0.228611	> 0.05	false	0.75056	6.22286	0.0162872	0.0338538	false	-0.79401	6.0937	0.00199651	0.0160009	false
orf19.1033	STR2	Ortholog(s) have cystathionine gamma-synthase activity, role in transsulfuration and cytosol, nucleus localization	0.225274	7.66838	0.514259	> 0.05	false	-0.200992	7.52624	0.523874	> 0.05	false	-0.261067	7.55727	0.428499	> 0.05	false	-0.440501	6.84391	0.109146	> 0.05	false
orf19.1034		Protein with a predicted cytochrome b5-like Heme/Steroid binding domain; Hap43, caspofungin repressed; flow model biofilm induced	-2.01137	6.20493	1.68591e-05	0.00014017	true	-2.65997	6.1672	1.29836e-08	1.82647e-07	true	-2.77405	6.21231	3.96214e-09	3.25364e-08	true	0.651238	4.98875	0.0526168	> 0.05	false
orf19.1035	WAR1	Zn(II)2Cys6 transcription factor; plays a role in resistance to weak organic acids; required for yeast cell adherence to silicone substrate; Spider biofilm induced	-1.16504	5.61749	0.0401282	> 0.05	false	-0.6399	5.87069	0.25298	> 0.05	false	-0.299117	6.07194	0.600084	> 0.05	false	0.0471166	5.23992	0.853434	> 0.05	false
orf19.1036	MNS1	Alpha-1,2-mannosidase; processes Man9GlcNAc2 to Man8GlcNAc2 isomer B; member of ER localized glycosyl hydrolase family 47; ER form is converted by Kex2 to cytosolic form; flow model biofilm repressed	-0.48298	7.78812	0.120479	> 0.05	false	-0.39928	7.89604	0.188179	> 0.05	false	-0.726865	7.8222	0.0206513	0.0414868	false	0.284025	7.78691	0.300089	0.0414868	false
orf19.1037		Protein of unknown function; rat catheter biofilm repressed	0.126902	5.90611	0.65221	> 0.05	false	0.0880642	5.95818	0.755148	> 0.05	false	-0.391414	5.78884	0.181667	> 0.05	false	0.495481	5.31808	0.0906325	> 0.05	false
orf19.1039	BET4	Ortholog(s) have Rab geranylgeranyltransferase activity and role in ER to Golgi vesicle-mediated transport, protein geranylgeranylation, protein targeting to membrane	-0.307627	4.10964	0.40126	> 0.05	false	-0.0705069	4.29259	0.858744	> 0.05	false	0.0838351	4.42983	0.809497	> 0.05	false	0.181808	4.50832	0.5657	> 0.05	false
orf19.104		Protein of unknown function; induced by alpha pheromone in SpiderM medium	1.12047	3.22359	0.00702124	0.0245891	false	1.592	3.63648	5.38006e-05	0.000275744	false	3.71439	5.48629	1.94714e-28	1.93784e-26	true	1.58266	3.49553	1.42243e-06	5.07205e-05	false
orf19.1040	MAD2	Protein required for the spindle assembly checkpoint of the cell cycle; necessary for survival in host cell macrophages and for virulence in a mouse model of systemic candidiasis	-0.413265	3.39304	0.264929	> 0.05	false	-0.415483	3.45948	0.268405	> 0.05	false	-0.330432	3.55844	0.328771	> 0.05	false	0.00383934	3.46467	1	> 0.05	false
orf19.1041		Ortholog(s) have cyclin-dependent protein kinase activity	0.214567	4.1387	0.559391	> 0.05	false	0.338216	4.27943	0.325865	> 0.05	false	0.373197	4.35831	0.234232	> 0.05	false	0.0595589	4.59327	0.839003	> 0.05	false
orf19.1042	POR1	Mitochondrial outer membrane porin; in detergent-resistant membrane fraction (possible lipid raft component); antigenic in human, mouse; Hap43p-induced; flucytosine-, macrophage-, farnesol- induced; fluconazole, caspofungin repressed	-0.356575	10.5801	0.283117	> 0.05	false	-0.169725	10.7376	0.605131	> 0.05	false	-0.273339	10.7483	0.425932	> 0.05	false	-0.0308118	10.5811	0.908211	> 0.05	false
orf19.1043		Ortholog(s) have lysophosphatidic acid acyltransferase activity, role in cellular triglyceride homeostasis, lipid particle organization, protein targeting to vacuole and Golgi apparatus, endoplasmic reticulum, lipid particle localization	-0.522717	4.75212	0.168336	> 0.05	false	-0.528237	4.82019	0.15786	> 0.05	false	-0.373392	4.9451	0.347534	> 0.05	false	-0.163456	4.59279	0.623457	> 0.05	false
orf19.1045		Putative U2 snRNP protein; Hap43p-induced gene; mutation confers hypersensitivity to 5-fluorocytosine (5-FC), 5-fluorouracil (5-FU), and tubercidin (7-deazaadenosine)	1.57851	4.11005	4.60758e-05	0.00033986	false	1.49025	4.1162	0.00134333	0.00473181	false	2.54154	5.01357	9.37382e-14	1.49176e-12	true	-0.782709	4.55395	0.0216368	> 0.05	false
orf19.1047	ERB1	Protein with a predicted role in ribosomal large subunit biogenesis; mutation confers hypersensitivity to 5-fluorocytosine (5-FC), 5-fluorouracil (5-FU), and tubercidin (7-deazaadenosine); hyphal, macrophage repressed	1.07467	4.87348	0.0070085	0.0245891	false	1.04272	4.92516	0.00690018	0.019529	false	2.28055	5.91691	9.50081e-09	7.3154e-08	true	-1.73136	8.03918	2.22789e-05	0.000397207	false
orf19.1048	IFD6	Aldo-keto reductase; similar to aryl alcohol dehydrogenases; protein increase correlates with MDR1 overexpression (not CDR1 or CDR2) in fluconazole-resistant clinical isolates; farnesol regulated; possibly essential; Spider biofilm induced	-1.98487	6.12348	7.43222e-09	1.59865e-07	false	-2.55401	6.09469	2.96683e-14	1.20627e-12	true	-2.36671	6.18428	2.45516e-12	3.14828e-11	true	0.982292	6.54365	0.000373399	0.00408481	false
orf19.1049		Predicted NUDIX hydrolase domain; Hap43-induced	0.704559	2.98879	0.0827361	> 0.05	false	0.902497	3.18885	0.022756	> 0.05	false	1.11283	3.38462	0.00290813	0.00748634	false	0.572741	3.9111	0.0530838	0.00748634	false
orf19.105	HAL22	Putative phosphoadenosine-5'-phosphate or 3'-phosphoadenosine 5'-phosphosulfate phosphatase; possible role in sulfur recycling; Hap43-repressed; F-12/CO2 biofilm induced	-0.44751	5.96675	0.119402	> 0.05	false	-0.712763	5.93112	0.0143101	0.0361713	false	-0.814997	5.95229	0.00414429	0.01025	false	-0.000815235	4.97675	1	0.01025	false
orf19.1050		Ortholog of S. cerevisiae : YMR087W, C. glabrata CBS138 : CAGL0J01397g, C. parapsilosis CDC317 : CPAR2_107150, Candida dubliniensis CD36 : CD36_03920 and Pichia stipitis Pignal : PICST_61741	0.321638	2.81275	0.426448	> 0.05	false	0.574751	3.03153	0.170123	> 0.05	false	1.02282	3.37202	0.00546535	0.0130153	false	0.529783	3.14518	0.0953015	0.0130153	false
orf19.1051	HTA2	Putative histone H2A; farnesol regulated; rat catheter biofilm repressed; Spider biofilm repressed; Hap43-induced	-0.17549	8.55225	0.628321	> 0.05	false	-1.30864	8.19788	0.000286169	0.00122162	false	-1.51185	8.20092	6.70013e-05	0.000253125	false	-0.222866	9.71559	0.419346	0.000253125	false
orf19.1052		Predicted histone H2B; Hap43-induced gene; Spider biofilm repressed	0.0177263	8.43932	0.96203	> 0.05	false	-1.15786	8.03591	0.00107037	0.00389586	false	-1.38128	8.02895	0.000147289	0.000524077	false	0.0360793	9.57385	0.8948	0.000524077	false
orf19.1053		Ortholog(s) have phosphatidylinositol deacylase activity and role in ER to Golgi vesicle-mediated transport, ER-associated protein catabolic process, GPI anchor metabolic process, protein retention in ER lumen, vesicle organization	-0.49635	5.38397	0.126641	> 0.05	false	-0.00729945	5.68036	0.991433	> 0.05	false	-0.085666	5.70026	0.792346	> 0.05	false	0.424547	5.88639	0.0957329	> 0.05	false
orf19.1054		Ortholog(s) have structural constituent of nuclear pore activity	-0.187622	7.18	0.521375	> 0.05	false	-0.017001	7.33483	0.952518	> 0.05	false	-0.384658	7.22204	0.169112	> 0.05	false	0.235689	7.53077	0.388903	> 0.05	false
orf19.1055	CDC3	Septin; essential for viability; functional homolog of S. cerevisiae Cdc3p; down-regulation associated with azole resistance; macrophage/pseudohyphal-repressed; virulence-group-correlated expression; gene has intron	0.196091	7.57658	0.522177	> 0.05	false	0.184422	7.64291	0.540295	> 0.05	false	0.221311	7.72121	0.483191	> 0.05	false	0.259864	8.5061	0.341756	> 0.05	false
orf19.1057		Ortholog of C. parapsilosis CDC317 : CPAR2_107050, Candida tenuis NRRL Y-1498 : CANTEDRAFT_113999, Debaryomyces hansenii CBS767 : DEHA2D12518g and Candida dubliniensis CD36 : CD36_03980	0.00991901	4.78009	0.983675	> 0.05	false	0.271514	4.99016	0.346975	> 0.05	false	0.232706	5.02764	0.41692	> 0.05	false	0.352554	4.75707	0.194141	> 0.05	false
orf19.1058		Ortholog(s) have ubiquitin binding activity, role in ubiquitin-dependent protein catabolic process and proteasome regulatory particle, lid subcomplex, proteasome storage granule localization	-0.591613	7.20305	0.0403365	> 0.05	false	-0.688819	7.23701	0.0142411	0.0360514	false	-1.07121	7.16063	0.000170794	0.000597512	false	0.123259	6.78406	0.646075	0.000597512	false
orf19.1059	HHF1	Putative histone H4; repressed in fkh2 mutant; regulated by Efg1; fluconazole induced; amphotericin B repressed; farnesol regulated; colony morphology-related gene regulation by Ssn6; Hap43-induced; rat catheter and Spider biofilm repressed	0.0375083	8.19078	0.914952	> 0.05	false	-0.943109	7.84743	0.00519946	0.0152933	false	-1.21287	7.81918	0.000548823	0.00169896	false	-0.0884987	9.16447	0.742921	0.00169896	false
orf19.1060		Ortholog of Candida dubliniensis CD36 : CD36_04005 and Candida albicans WO-1 : CAWG_00968	2.26488	2.28605	0.000142547	0.000880097	false	1.8762	2.06181	0.0030962	0.00973214	false	3.49191	3.48894	8.50857e-14	1.36383e-12	false	0.877691	1.00943	0.0969634	> 0.05	false
orf19.1061	HHT21	Putative histone H3; amphotericin B repressed; regulated by Efg1, farnesol; Hap43-induced; rat catheter and Spider biofilm repressed	-0.194353	8.85049	0.588215	> 0.05	false	-1.38174	8.48451	0.000116823	0.000552859	false	-1.4094	8.53565	0.000135294	0.000483856	false	-0.131893	9.57136	0.626447	0.000483856	false
orf19.1062		Ortholog of C. parapsilosis CDC317 : CPAR2_107000, Candida tenuis NRRL Y-1498 : CANTEDRAFT_113990, Candida dubliniensis CD36 : CD36_04020 and Pichia stipitis Pignal : PICST_32780	4.03345	0.996068	3.47969e-08	6.32223e-07	false	4.55812	1.5333	1.2167e-10	2.74087e-09	false	5.08741	2.05673	8.10287e-16	1.68844e-14	false	1.25811	0.326632	0.0249928	> 0.05	false
orf19.1063		Ortholog(s) have dolichyl-phosphate-mannose-glycolipid alpha-mannosyltransferase activity, role in GPI anchor biosynthetic process and integral to endoplasmic reticulum membrane, mannosyltransferase complex, mitochondrion localization	-0.333815	5.03718	0.27685	> 0.05	false	-0.625904	4.98461	0.0348581	> 0.05	false	-0.418364	5.13098	0.16239	> 0.05	false	0.126762	4.9128	0.657592	> 0.05	false
orf19.1064	ACS2	Acetyl-CoA synthetase; antigenic during human and murine infection; induced by Efg1; macrophage-induced protein; soluble protein in hyphae; gene contains intron; flow model and Spider biofilm repressed	-0.876876	10.2369	0.00961372	0.0319572	false	-0.727289	10.364	0.0278302	> 0.05	false	-0.114064	10.6851	0.740058	> 0.05	false	-0.838682	10.1681	0.0018986	0.0154153	false
orf19.1065	SSA2	HSP70 family chaperone; cell wall fractions; antigenic; beta-defensin peptides impport; ATPase domain binds histatin 5; at hyphal surface, not yeast; farnesol-repressed in biofilm; flow model, Spider biofilm repressed; caspofungin repressed	-1.65075	11.3774	6.35089e-06	5.97288e-05	false	-1.31794	11.5377	0.000301467	0.00128037	false	-2.08725	11.4145	1.87784e-08	1.36846e-07	true	0.424102	11.711	0.124051	> 0.05	false
orf19.1066	GIG1	Protein induced by N-acetylglucosamine (GlcNAc); localized in cytoplasm; mutation causes increased resistance to nikkomycin Z	1.12004	3.38618	0.00327324	0.0129531	false	1.25105	3.55238	0.00117388	0.00421056	false	1.71655	3.94765	1.15067e-06	6.14794e-06	false	1.62657	2.58636	0.000108064	0.00146458	false
orf19.1067	GPM2	Putative phosphoglycerate mutase; repressed in hyphae; macrophage/pseudohyphal-repressed; induced by high levels of peroxide stress, farnesol; flow model biofilm induced; rat catheter and Spider biofilm repressed	-1.87436	7.4292	6.6538e-06	6.22265e-05	false	-2.3935	7.40407	1.24253e-08	1.76281e-07	true	-2.91887	7.39095	3.37878e-12	4.25088e-11	true	0.704336	5.39193	0.019411	> 0.05	false
orf19.1069	RPN4	C2H2 transcription factor; putative regulator of proteasome genes; DNA recognition sequence (GAAGGCAAAA) enriched in regions upstream of proteasome genes; induced in core stress response; Hap43-induced; Spider biofilm induced	2.11071	6.6185	8.62751e-13	3.88704e-11	true	2.60378	7.10311	5.30595e-19	4.21192e-17	true	2.52083	7.09033	4.60183e-17	1.16673e-15	true	0.36586	6.49027	0.186769	> 0.05	false
orf19.107		DEAH-box ATP-dependent RNA helicase, required for 18S rRNA synthesis; rat catheter biofilm induced	1.53006	3.89248	4.69653e-05	0.000344137	false	1.89253	4.24328	1.80378e-07	1.81686e-06	false	3.08202	5.2888	1.24887e-21	6.40574e-20	true	-1.37986	6.58824	0.000156077	0.00195625	false
orf19.1070		Ortholog(s) have cytoplasm localization	-0.0755676	4.87255	0.806321	> 0.05	false	0.243661	5.10987	0.430274	> 0.05	false	0.26777	5.18143	0.371715	> 0.05	false	0.114127	4.6393	0.663375	> 0.05	false
orf19.1075		Protein of unknown function; Spider biofilm induced	-0.154614	3.67941	0.785233	> 0.05	false	0.401838	4.03767	0.4114	> 0.05	false	0.759373	4.30407	0.129446	> 0.05	false	0.0715009	4.19886	0.844213	> 0.05	false
orf19.1075.1		Pseudogene; added to Assembly 21 based on comparative genome analysis	2.26337	4.88111	1.14402e-06	1.34776e-05	true	3.37746	5.91813	2.68173e-13	9.61386e-12	true	3.12046	5.74593	3.35799e-11	3.70713e-10	true	0.559217	2.06912	0.220389	> 0.05	false
orf19.1077	ATM1	Member of MDR subfamily of ABC family; ortholog of S. cerevisiae ABC transporter, Atm1; induced in low iron; induced by nitric oxide independent of Yhb1	0.943803	6.7754	0.00159028	0.00703183	false	0.691433	6.68725	0.0196339	0.0477109	false	0.219106	6.47215	0.465181	> 0.05	false	0.378165	5.76618	0.156075	> 0.05	false
orf19.1078	HBR2	Putative alanine glyoxylate aminotransferase; regulated by Gcn4p and hemoglobin; stationary phase enriched protein	-0.0547196	8.07328	0.861089	> 0.05	false	-0.103353	8.12209	0.735886	> 0.05	false	-0.657872	7.93934	0.0433827	> 0.05	false	0.392138	7.18368	0.161232	> 0.05	false
orf19.1080		Ortholog of C. parapsilosis CDC317 : CPAR2_600390, Candida dubliniensis CD36 : CD36_64900, Pichia stipitis Pignal : PICST_30726 and Candida guilliermondii ATCC 6260 : PGUG_04023	2.20236	3.02245	2.48446e-07	3.65704e-06	false	2.08558	3.01242	2.49979e-06	1.86658e-05	false	2.20887	3.15857	1.80666e-07	1.10929e-06	false	0.13901	1.91208	0.758773	> 0.05	false
orf19.1082		Protein with an Alba DNA/RNA-binding protein domain; Spider biofilm induced	1.46363	2.45304	0.00100787	0.00482101	false	1.672	2.6855	0.000117149	0.000553616	false	2.19986	3.15003	2.07398e-08	1.49993e-07	false	-1.09998	4.16462	0.00251513	0.0193213	false
orf19.1082.1		Ortholog(s) have cytochrome-c oxidase activity, role in mitochondrial respiratory chain complex IV assembly and cytosol, mitochondrial respiratory chain complex IV, nucleus localization	-0.369536	8.66224	0.247011	> 0.05	false	-0.0400667	8.88793	0.902144	> 0.05	false	-0.39728	8.78128	0.229067	> 0.05	false	-0.0819731	8.71579	0.762229	> 0.05	false
orf19.1083		Putative protein of unknown function; macrophage-induced gene	0.108901	3.60479	0.769891	> 0.05	false	-0.0312278	3.60327	0.955571	> 0.05	false	0.452245	3.92499	0.168703	> 0.05	false	-1.16216	4.35735	0.000205089	0.00247294	false
orf19.1084	CDC39	Protein similar to S. cerevisiae Cdc39p, which is part of the CCR4-NOT transcription regulatory complex; transposon mutation affects filamentous growth	-0.799462	8.32434	0.0157782	0.0481507	false	-0.715861	8.42783	0.029438	> 0.05	false	-0.881091	8.42608	0.00963052	0.0214309	false	-0.249622	8.50714	0.387265	0.0214309	false
orf19.1085		Ortholog(s) have ubiquitin-protein ligase activity and role in ER-associated protein catabolic process, protein ubiquitination involved in ubiquitin-dependent protein catabolic process, vesicle organization	-1.01193	7.57322	0.00146181	0.00655064	false	-1.28408	7.56038	2.90827e-05	0.00016158	false	-1.28437	7.61922	7.28384e-05	0.000273165	false	0.242338	7.59144	0.374438	0.000273165	false
orf19.1086		Ortholog(s) have role in protein deubiquitination, regulation of ER to Golgi vesicle-mediated transport, regulation of retrograde vesicle-mediated transport, Golgi to ER, ribophagy and cytoplasm localization	-0.495095	6.77763	0.083138	> 0.05	false	-0.238269	6.96234	0.374962	> 0.05	false	-0.376177	6.95917	0.183544	> 0.05	false	0.011245	7.42967	0.968811	> 0.05	false
orf19.1087		Ortholog of C. parapsilosis CDC317 : CPAR2_601130, Lodderomyces elongisporus NRLL YB-4239 : LELG_04885, Candida dubliniensis CD36 : CD36_64620 and Candida orthopsilosis Co 90-125 : CORT0F02130	-0.0926206	4.44462	0.800311	> 0.05	false	0.100593	4.61347	0.754275	> 0.05	false	0.231696	4.74252	0.46802	> 0.05	false	-0.164466	4.56917	0.553359	> 0.05	false
orf19.1089	PEX11	Putative peroxisomal membrane protein; role in fatty acid oxidation; expression is Tac1-regulated; Hms1p-dependent induction by geldamycin; Spider biofilm induced	0.0656628	6.25272	0.830675	> 0.05	false	0.239808	6.4171	0.379823	> 0.05	false	0.0925598	6.39762	0.764805	> 0.05	false	0.190375	4.8979	0.508036	> 0.05	false
orf19.109		Probable mitochondrial tyrosyl-tRNA synthetase, based on conservation in other fungi	-0.603883	6.03149	0.0393245	> 0.05	false	-0.586577	6.10988	0.0391208	> 0.05	false	-0.413681	6.24121	0.153104	> 0.05	false	-0.0776285	6.01115	0.765519	> 0.05	false
orf19.1090		Ortholog of C. parapsilosis CDC317 : CPAR2_601110, Candida tenuis NRRL Y-1498 : CANTEDRAFT_119969, Lodderomyces elongisporus NRLL YB-4239 : LELG_04881 and Debaryomyces hansenii CBS767 : DEHA2A05896g	1.14334	1.44675	0.0463498	> 0.05	false	1.13946	1.51944	0.0382461	> 0.05	false	2.05494	2.22638	8.02639e-06	3.64578e-05	false	-0.768568	2.61967	0.0425514	3.64578e-05	false
orf19.1091	NOP8	Ortholog of S. cereviiae Nop8; has a role in ribosomal large subunit biogenesis; rat catheter and Spider biofilm induced	2.13435	3.3272	1.10163e-05	9.63997e-05	false	2.70622	3.87511	6.84626e-09	1.03283e-07	false	3.61264	4.7064	3.47967e-19	1.20846e-17	true	-1.66631	6.48989	0.000152589	0.00191613	false
orf19.1092		Dolichol-P-Man dependent alpha(1-3) mannosyltransferase; role in the synthesis of dolichol-linked oligosaccharide donor for N-linked glycosylation of proteins; rat catheter biofilm repressed	-0.0453736	5.67547	0.882346	> 0.05	false	-0.127532	5.70746	0.654613	> 0.05	false	-0.255939	5.70619	0.383474	> 0.05	false	-0.0753439	6.14771	0.790633	> 0.05	false
orf19.1093	FLO8	Transcription factor; required for hyphal formation and CO2 induced white-opaque switching; regulates hyphal gene expression; required for virulence in mouse systemic infection; binds Efg1p; binds Mss11p via LisH motif; has LUFS domain	-0.896324	6.85345	0.00154263	0.00686666	false	-0.644553	7.01882	0.0182186	0.0447295	false	-0.438832	7.16181	0.118357	> 0.05	false	-0.219182	7.43507	0.435733	> 0.05	false
orf19.1095	GLE2	Putative nuclear pore complex; possibly an essential gene, disruptants not obtained by UAU1 method; rat catheter biofilm repressed	-0.265032	6.52844	0.34215	> 0.05	false	-0.209126	6.62633	0.45152	> 0.05	false	-0.323979	6.63272	0.258607	> 0.05	false	-0.291605	6.89115	0.286381	> 0.05	false
orf19.1096		Has domain(s) with predicted voltage-gated chloride channel activity, role in chloride transport, transmembrane transport and membrane localization	-0.0106565	5.26184	0.975146	> 0.05	false	0.326875	5.51287	0.248456	> 0.05	false	0.181516	5.49207	0.521711	> 0.05	false	-0.269049	5.49258	0.303654	> 0.05	false
orf19.1097	ALS2	ALS family protein; role in adhesion, biofilm formation, germ tube induction; expressed at infection of human buccal epithelial cells; putative GPI-anchor; induced by ketoconazole, low iron and at cell wall regeneration; regulated by Sfu1p	-0.261757	7.86967	0.505672	> 0.05	false	-0.531979	7.82532	0.179745	> 0.05	false	-0.553327	7.87535	0.173229	> 0.05	false	-0.31651	8.21778	0.453037	> 0.05	false
orf19.11		Protein of unknown function; transcript regulated by Mig1 and Tup1; rat catheter biofilm induced	0.711409	1.9488	0.134359	> 0.05	false	0.0818226	1.66606	0.865185	> 0.05	false	0.236349	1.81031	0.594147	> 0.05	false	1.96851	-0.813091	0.0293203	> 0.05	false
orf19.1105		Ortholog of C. parapsilosis CDC317 : CPAR2_302980, Candida dubliniensis CD36 : CD36_53630, Pichia stipitis Pignal : PICST_32155 and Candida orthopsilosis Co 90-125 : CORT0E05120	-0.0462485	1.32538	0.942048	> 0.05	false	-0.213497	1.30447	0.727101	> 0.05	false	0.720336	1.87013	0.11937	> 0.05	false	0.289815	0.962969	0.611514	> 0.05	false
orf19.1105.2	PGA56	Regulator of sorbose utilization; putative GPI-anchor; hypha and cell wall regeneration induced; colony morphology-related gene regulation by Ssn6; induced by Tbf1, Hap43; Spider biofilm induced	-0.337239	11.2235	0.386575	> 0.05	false	-0.739961	11.1319	0.0584253	> 0.05	false	-0.446249	11.3075	0.260413	> 0.05	false	-0.122099	11.5944	0.646361	> 0.05	false
orf19.1105.3		Ortholog of Candida albicans WO-1 : CAWG_04761	2.9447	-0.846348	0.0231893	> 0.05	false	3.17683	-0.65662	0.00625338	0.0179499	false	4.34667	0.190784	3.51123e-05	0.000140113	false	1.88148	-0.864264	0.0435702	0.000140113	false
orf19.1106		Protein with Mob2p-dependent hyphal regulation; fluconazole-induced	1.95453	1.9763	6.20224e-05	0.000433507	false	2.16325	2.22142	3.05469e-05	0.000168197	false	2.62884	2.64227	2.44255e-08	1.74378e-07	false	1.9657	0.212956	0.000938003	0.00871115	false
orf19.1107		Protein of unknown function; Spider biofilm induced	0.505153	6.72047	0.0772682	> 0.05	false	0.592121	6.84496	0.0316586	> 0.05	false	0.141847	6.64943	0.621478	> 0.05	false	0.551363	4.01616	0.107609	> 0.05	false
orf19.1108	HAM1	Putative deoxyribonucleoside triphosphate pyrophosphohydrolase; caspofungin repressed; regulated by Gcn2p and Gcn4p	0.49447	6.3926	0.0968808	> 0.05	false	-0.0500149	6.17152	0.866452	> 0.05	false	-0.206362	6.15515	0.486811	> 0.05	false	-0.495957	6.31182	0.059725	> 0.05	false
orf19.1109		Ortholog of C. parapsilosis CDC317 : CPAR2_303030, Debaryomyces hansenii CBS767 : DEHA2G07766g, Candida dubliniensis CD36 : CD36_53580 and Candida tropicalis MYA-3404 : CTRG_03189	-0.314719	5.39583	0.293275	> 0.05	false	0.00838367	5.62156	0.976174	> 0.05	false	0.0720953	5.71267	0.801904	> 0.05	false	-0.17468	6.77148	0.515457	> 0.05	false
orf19.111	CAN2	Basic amino acid permease; arginine metabolism; regulated by Nrg1/Tup1; caspofungin, flucytosine induced; colony morphology-related regulation by Ssn6; Hap43-repressed; rat catheter and Spider biofilm induced; promoter bound by Efg1	1.36192	8.29971	0.000213613	0.00125828	false	1.55427	8.51351	2.6232e-05	0.000147111	false	0.833292	8.07117	0.0319345	> 0.05	false	-0.320278	5.81479	0.36155	> 0.05	false
orf19.1110		Thiamine pyrophosphokinase, phosphorylates thiamine to produce the coenzyme thiamine pyrophosphate (thiamine diphosphate); active as a homodimer	-0.131807	4.78497	0.660299	> 0.05	false	-0.153448	4.84579	0.615712	> 0.05	false	-0.507689	4.74606	0.0952211	> 0.05	false	-0.344309	4.16416	0.263204	> 0.05	false
orf19.1111		Ortholog(s) have chromatin binding, protein complex scaffold activity and role in RNA polymerase II transcriptional preinitiation complex assembly, histone acetylation	-0.183201	5.4926	0.520534	> 0.05	false	-0.0424663	5.63245	0.880942	> 0.05	false	-0.496514	5.48377	0.0817417	> 0.05	false	0.0705566	5.36166	0.779811	> 0.05	false
orf19.1112	BUD7	Ortholog(s) have role in Golgi to plasma membrane transport, fungal-type cell wall chitin biosynthetic process and cell division site, clathrin-coated vesicle, cytosol, exomer complex, nucleus, ribosome localization	0.318529	7.25695	0.278848	> 0.05	false	0.470484	7.41593	0.0995442	> 0.05	false	0.168383	7.30656	0.559745	> 0.05	false	0.143885	7.32871	0.591896	> 0.05	false
orf19.1113		Ortholog of Debaryomyces hansenii CBS767 : DEHA2G07854g, Candida dubliniensis CD36 : CD36_53540, Pichia stipitis Pignal : PICST_32162 and Spathaspora passalidarum NRRL Y-27907 : SPAPADRAFT_50795	3.17541	3.43354	1.03027e-12	4.57988e-11	false	3.66767	3.95264	6.7173e-16	3.44546e-14	false	3.63484	3.97297	1.51888e-15	3.02326e-14	false	-0.334565	2.91114	0.32437	> 0.05	false
orf19.1114		Cytochrome c oxidase subunit; membrane-localized protein; rat catheter biofilm induced	-0.799559	5.34277	0.0091446	0.0306106	false	-0.616473	5.4838	0.0321204	> 0.05	false	-0.385707	5.63946	0.198544	> 0.05	false	-0.137382	5.57255	0.642373	> 0.05	false
orf19.1115	GUK1	Putative guanylate kinase; identified in extracts from biofilm and planktonic cells; protein level decrease in stationary phase cultures; Hap43p-induced gene	0.308573	4.24266	0.358806	> 0.05	false	-0.28184	4.01357	0.430592	> 0.05	false	0.81468	4.67613	0.0139753	0.0296208	false	-0.545223	6.59301	0.0481673	0.0296208	false
orf19.1116		Protein of unknown function; planktonic growth-induced gene	-2.3149	4.30835	3.42366e-07	4.796e-06	true	-2.58388	4.33006	2.44822e-08	3.15149e-07	true	-1.93188	4.50883	8.64313e-06	3.90199e-05	false	0.439869	4.58925	0.117628	3.90199e-05	false
orf19.1117		Protein similar to Candida boidinii formate dehydrogenase; virulence-group-correlated expression; Hap43-repressed; Spider biofilm repressed	-0.552998	2.30163	0.354991	> 0.05	false	-0.730574	2.28197	0.162569	> 0.05	false	0.00207596	2.68183	0.97544	> 0.05	false	-0.614355	-0.92504	0.534994	> 0.05	false
orf19.1119	MTR10	Putative importin; member of a family of fungal-specific nuclear importins; Mig1-regulated	-0.391996	6.62184	0.168947	> 0.05	false	-0.124523	6.8162	0.647381	> 0.05	false	-0.113496	6.88021	0.687641	> 0.05	false	0.20359	7.3991	0.452542	> 0.05	false
orf19.1120	FAV2	Adhesin-like protein; induced by mating factor in MTLa/a opaque cells, in cyr1 null, in filaments; regulated by Nrg1, Rfg1, Tup1, Tec1, Efg1, Ntd80, Rob1, Brg1; induced in oralpharyngeal candidasis; Spider biofilm induced	0.998984	4.44672	0.00656112	0.0233331	false	1.08377	4.57738	0.00225661	0.00746753	false	1.99489	5.3045	1.19145e-09	1.04949e-08	false	0.204155	4.42716	0.462747	> 0.05	false
orf19.1121		Ortholog of Candida dubliniensis CD36 : CD36_53470, Spathaspora passalidarum NRRL Y-27907 : SPAPADRAFT_55715, Candida tropicalis MYA-3404 : CTRG_05538 and Candida albicans WO-1 : CAWG_04746	-0.362939	5.35177	0.265599	> 0.05	false	-0.402354	5.4058	0.214358	> 0.05	false	-0.775298	5.3149	0.0186485	0.0379688	false	-0.249222	4.78942	0.347882	0.0379688	false
orf19.1122		Protein of unknown function; induced by alpha pheromone in SpiderM medium; Spider biofilm induced	3.49742	0.917986	6.92694e-05	0.000474706	false	3.75284	1.21659	1.56263e-05	9.33655e-05	false	4.96749	2.32535	1.06315e-14	1.89548e-13	false	2.20648	-0.671195	0.00924781	> 0.05	false
orf19.1123		Ortholog of Candida albicans WO-1 : CAWG_04744	4.91928	-1.16391	0.0235677	> 0.05	false	5.13325	-1.0646	0.0157202	0.0392005	false	5.93998	-0.468906	0.000246745	0.000833062	false	0.216974	-1.09599	1	0.000833062	false
orf19.1124		Protein of unknown function; flow model biofilm induced; Spider biofilm induced	3.36263	4.75062	8.74527e-18	8.33049e-16	true	3.34081	4.80414	3.27876e-20	3.12109e-18	true	4.27715	5.71799	1.09166e-32	1.54877e-30	true	0.381023	3.47111	0.246021	> 0.05	false
orf19.1124.2		Ortholog(s) have diphthine synthase activity, role in peptidyl-diphthamide biosynthetic process from peptidyl-histidine and cytosol, nucleus localization	0.892092	1.77057	0.142941	> 0.05	false	0.783858	1.77515	0.182533	> 0.05	false	1.79671	2.52209	0.000277702	0.000924473	false	-1.37783	3.46654	9.19168e-05	0.00130113	false
orf19.113	CIP1	Possible oxidoreductase; transcript induced by cadmium but not other heavy metals, heat shock, yeast-hypha switch, oxidative stress (via Cap1), or macrophage interaction; stationary phase enriched protein; Spider biofilm induced	3.62086	7.76849	2.89361e-24	6.60171e-22	true	3.70752	7.92264	2.13346e-15	1.02345e-13	true	3.16791	7.48727	2.21189e-18	6.99e-17	true	3.24484	3.91434	5.20088e-11	8.86106e-09	false
orf19.1133	MSB1	Putative regulator of transcription; expression in S. cerevisiae flo8 and flo11 mutants suggests a role in regulation of adhesion factors	1.15007	6.37336	0.000145749	0.000897373	false	1.38852	6.61488	3.9003e-06	2.73091e-05	false	1.39186	6.67547	5.93671e-06	2.76245e-05	false	0.275626	6.81391	0.337351	2.76245e-05	false
orf19.1135	CAS1	Putative transcription factor with Ku70/Ku80 beta-barrel DNA-binding motif; involved in telomerase regulation and telomere protection; mutation causes marginal increase in caspofungin sensitivity	-0.0154949	5.94851	0.958135	> 0.05	false	-0.0938071	5.98198	0.735783	> 0.05	false	-0.378766	5.90926	0.177542	> 0.05	false	0.629084	5.39419	0.0158551	> 0.05	false
orf19.1136		Ortholog(s) have cytosol, nucleus localization	0.112758	3.60339	0.759078	> 0.05	false	0.205854	3.7234	0.59976	> 0.05	false	0.264548	3.81551	0.44617	> 0.05	false	0.729027	2.81642	0.0278852	> 0.05	false
orf19.1137		Ortholog(s) have thymidylate kinase activity, uridylate kinase activity, role in dTDP biosynthetic process, dTTP biosynthetic process, dUDP biosynthetic process, nucleotide phosphorylation and cytosol, nucleus localization	-0.808087	4.49124	0.0151092	0.0464063	false	-0.994493	4.49355	0.00211575	0.00705744	false	-1.02286	4.54551	0.00102063	0.00294485	false	-0.401664	4.5664	0.133836	0.00294485	false
orf19.1139		Protein of unknown funtion; S. cerevisiae ortholog Svl3 plays a role in endocytosis and is localized to the bud neck; Spider biofilm induced	0.653852	6.66728	0.0265177	> 0.05	false	1.18638	7.08831	1.86683e-05	0.000108812	false	1.1586	7.12734	5.16627e-05	0.000200167	false	-0.0308666	7.56596	0.913042	0.000200167	false
orf19.114		Ortholog of C. parapsilosis CDC317 : CPAR2_603230, Debaryomyces hansenii CBS767 : DEHA2E21142g, Candida dubliniensis CD36 : CD36_61190 and Pichia stipitis Pignal : psti_CGOB_00078	0.800566	3.79952	0.0243793	> 0.05	false	0.824557	3.88887	0.0229821	> 0.05	false	1.22728	4.21568	0.000180957	0.000629104	false	-0.0976078	3.71081	0.745554	0.000629104	false
orf19.1140		Protein of unknown function; Spider biofilm repressed	-0.246319	6.8246	0.380906	> 0.05	false	-0.119754	6.95632	0.654658	> 0.05	false	-0.525809	6.83405	0.0652517	> 0.05	false	0.18721	6.40593	0.477492	> 0.05	false
orf19.1142	AVT4	Putative vacuolar transporter of large neutral amino acids; induced by alpha pheromone in SpiderM medium	1.60755	6.55334	3.00459e-08	5.61606e-07	false	1.38047	6.45954	9.91411e-07	8.28412e-06	false	1.02883	6.27264	0.000308046	0.00101435	false	0.211266	5.44228	0.421412	0.00101435	false
orf19.1143		Ortholog of Pichia stipitis Pignal : PICST_30878, Spathaspora passalidarum NRRL Y-27907 : SPAPADRAFT_60017, Candida guilliermondii ATCC 6260 : PGUG_05223 and Candida tropicalis MYA-3404 : CTRG_01052	-0.142414	4.55163	0.650593	> 0.05	false	0.0798375	4.73393	0.805561	> 0.05	false	-0.0155022	4.74433	0.963971	> 0.05	false	0.192668	5.16791	0.446186	> 0.05	false
orf19.1144		Protein with SEL-1 like protein domain; early-stage flow model biofilm induced	0.551128	7.8231	0.0936839	> 0.05	false	0.287259	7.7447	0.350543	> 0.05	false	0.830097	8.12649	0.0102048	0.0225467	false	0.275683	7.69757	0.311486	0.0225467	false
orf19.1146		Ortholog of Candida albicans WO-1 : CAWG_00265	-0.105296	4.53212	0.760963	> 0.05	false	-0.725385	4.33266	0.0325957	> 0.05	false	-0.52188	4.47532	0.114543	> 0.05	false	-0.28728	4.75084	0.291856	> 0.05	false
orf19.1148		Ortholog of Candida dubliniensis CD36 : CD36_11020 and Candida albicans WO-1 : CAWG_00266	4.84579	1.26607	9.44254e-09	1.99882e-07	false	4.32324	0.909829	1.61206e-06	1.2661e-05	false	5.41352	1.89511	8.24776e-14	1.32521e-12	false	3.72855	-0.979852	0.00113999	0.010217	false
orf19.1149	MRF1	Putative mitochondrial respiratory protein; induced by farnesol, benomyl, nitric oxide, core stress response; oxidative stress-induced via Cap1; stationary-phase enriched protein; Spider biofilm induced	0.0202646	6.64055	0.944483	> 0.05	false	0.07479	6.74058	0.809285	> 0.05	false	-0.270155	6.63223	0.411675	> 0.05	false	1.1054	6.05819	1.87668e-05	0.000344731	false
orf19.115		Has domain(s) with predicted intracellular localization	1.17927	3.17138	0.0054627	0.020058	false	1.26406	3.30831	0.00157525	0.00545289	false	1.52134	3.55097	2.24528e-05	9.31646e-05	false	-0.402388	3.26123	0.198849	9.31646e-05	false
orf19.1150		GATA-like transcription factor; oral infection induced; mutant has reduced capacity to damage oral epithelial cells; regulated by Gcn2 and Gcn4; Spider biofilm induced	2.40893	6.09392	7.96576e-14	4.14966e-12	true	2.31586	6.09054	3.49702e-13	1.20197e-11	true	1.73938	5.68806	4.48946e-08	3.06433e-07	false	0.563701	4.75605	0.0320532	> 0.05	false
orf19.1150.1		Ortholog of C. parapsilosis CDC317 : CPAR2_804585, Debaryomyces hansenii CBS767 : DEHA2F10406g, Candida dubliniensis CD36 : CD36_10990 and Pichia stipitis Pignal : psti_CGOB_00017	0.466452	2.71976	0.268809	> 0.05	false	0.631369	2.89096	0.134239	> 0.05	false	0.116471	2.6565	0.781525	> 0.05	false	-0.496166	2.31911	0.181737	> 0.05	false
orf19.1152		Protein of unknown function; induced in core stress response; Gcn2 and Gcn4 regulated; flow model biofilm induced; Spider biofilm induced	-1.33786	9.14913	5.24195e-05	0.000375843	false	-1.43922	9.19348	1.35277e-05	8.22369e-05	false	-2.52939	9.02941	3.46132e-13	5.06142e-12	true	0.420266	7.54848	0.124962	> 0.05	false
orf19.1153	GAD1	Putative glutamate decarboxylase; alkaline, macrophage-downregulated gene; amphotericin B induced; induced by Mnl1 under weak acid stress; stationary phase enriched protein; rat catheter biofilm repressed	-2.02126	8.87219	8.64153e-09	1.84685e-07	true	-2.14322	8.92113	1.37633e-09	2.49385e-08	true	-2.57068	8.90988	5.10299e-12	6.28705e-11	true	0.732789	8.76332	0.00718869	0.0436559	false
orf19.1154	EGD1	Putative GAL4 DNA-binding enhancer protein; soluble protein in hyphae; biofilm induced; macrophage/pseudohyphal-induced; equal level of protein in exponential and stationary growth phase yeast cultures; Spider biofilm repressed	-0.747252	9.84854	0.0251584	> 0.05	false	-1.59164	9.66001	2.70417e-06	1.99905e-05	false	-1.45326	9.75442	2.69836e-05	0.000110491	false	-0.36795	10.1584	0.169987	0.000110491	false
orf19.1155	DPP2	Protein similar to S. cerevisiae pyrophosphate phosphatase Lpp1p; possible role in farnesol biosynthesis	0.00228133	5.35487	0.994179	> 0.05	false	0.0315327	5.4416	0.915879	> 0.05	false	-0.317467	5.33352	0.265198	> 0.05	false	0.345508	5.38679	0.174124	> 0.05	false
orf19.1156	FUS1	Membrane protein required for mating; ortholog of S. cerevisiae Fus1; transcript induced by Cph1 in cells homozygous for the MTLa locus; alpha factor induced	1.42642	1.66546	0.00539813	0.0198866	false	1.93368	2.11663	9.8002e-05	0.000473534	false	1.90828	2.14773	4.41365e-05	0.000173119	false	0.0776758	0.0417405	1	0.000173119	false
orf19.1158		Ortholog of S. cerevisiae Yft2 required for normal ER membrane biosynthesis; Hap43-repressed gene	1.85285	3.80929	7.10447e-07	9.09264e-06	false	1.96145	3.97209	2.63181e-07	2.54332e-06	false	1.62254	3.76622	4.65202e-06	2.2098e-05	false	0.81213	2.83193	0.0214939	2.2098e-05	false
orf19.1159		Protein similar to A. nidulans CysA serine O-trans-acetylase; suggests that C. albicans uses an O-acetyl-serine (OAS) pathway of sulfur assimilation; F-12/CO2 early biofilm induced; Spider biofilm induced	2.00135	5.95129	1.09769e-09	2.72096e-08	true	1.97537	6.00454	1.05452e-09	1.93706e-08	false	1.72524	5.86743	1.28522e-07	8.06952e-07	false	-0.141007	4.21651	0.70513	> 0.05	false
orf19.1160		Ortholog(s) have COPII adaptor activity and role in ER to Golgi vesicle-mediated transport, fungal-type cell wall organization, protein glycosylation, protein retention in Golgi apparatus	-0.127391	5.71313	0.657174	> 0.05	false	-0.174198	5.7627	0.535913	> 0.05	false	-0.684666	5.60224	0.020349	0.0409437	false	-0.175876	5.39853	0.498776	0.0409437	false
orf19.1161	PLD1	Phospholipase D1; required for phosphatidic acid and for most diacylglycerol production; required for wild-type mouse virulence, but not rat oral virulence; mutant defect in hyphal growth on solid substrates; similar to S. cerevisiae Spo14p	-0.691535	9.01659	0.0419328	> 0.05	false	-0.897088	9.01375	0.00809794	0.0223776	false	-1.22388	8.96627	0.000541308	0.00168116	false	-0.108953	8.52354	0.701686	0.00168116	false
orf19.1162		Protein of unknown function; transcript upregulated by benomyl treatment	-0.72333	6.09476	0.0158995	0.0484729	false	-0.852025	6.11867	0.00378704	0.0115941	false	-1.17379	6.07032	0.000153972	0.000545821	false	0.11644	5.62413	0.661805	0.000545821	false
orf19.1162.1		Ortholog(s) have Golgi apparatus localization	0.509313	2.63055	0.207827	> 0.05	false	0.663151	2.79558	0.111736	> 0.05	false	0.573067	2.80068	0.140352	> 0.05	false	-0.177812	2.60422	0.615785	> 0.05	false
orf19.1163		Has domain(s) with predicted GTP binding activity and intracellular localization	0.0975092	4.46058	0.759662	> 0.05	false	0.499312	4.75578	0.111141	> 0.05	false	0.726677	4.95158	0.0203405	0.0409389	false	-0.43134	4.8988	0.109902	0.0409389	false
orf19.1164	GAR1	Putative H/ACA snoRNP pseudouridylase complex protein; mutation confers hypersensitivity to tubercidin (7-deazaadenosine); macrophage/pseudohyphal-induced; Spider biofilm repressed	0.205633	5.93625	0.465545	> 0.05	false	-0.478062	5.68052	0.0856046	> 0.05	false	0.53163	6.25128	0.0701772	> 0.05	false	-1.3195	7.63671	3.85091e-05	0.000632459	false
orf19.1166	CTA3	Protein similar to S. cerevisiae Ede1p, which is involved in endocytosis; activates transcription in 1-hybrid assay in S. cerevisiae	-0.926327	8.46052	0.00363436	0.0141553	false	-0.857669	8.55696	0.00636377	0.0182119	false	-1.02471	8.55834	0.0016453	0.0045129	false	-0.30725	8.05085	0.26236	0.0045129	false
orf19.1167		Ortholog(s) have sulfonate dioxygenase activity and role in sulfur compound catabolic process	0.616925	4.03504	0.134855	> 0.05	false	0.363974	3.96009	0.37985	> 0.05	false	0.433086	4.05843	0.268647	> 0.05	false	0.455618	2.7627	0.197669	> 0.05	false
orf19.1168	ZCF3	Zn(II)2Cys6 domain transcription factor; required for filamentous growth, resistance to rapamycin and flucytosine; possibly an essential gene, disruptants not obtained by UAU1 method; Hap43-repressed; Spider and flow model biofilm induced	-0.801946	6.72599	0.0159129	0.0484729	false	-0.671285	6.84705	0.0374872	> 0.05	false	-1.13783	6.74278	0.000841764	0.00248578	false	0.483544	7.08028	0.074477	0.00248578	false
orf19.1169		Putative DnaJ-like molecular chaperone; Spider biofilm induced	0.247663	4.72824	0.486274	> 0.05	false	0.642494	5.0288	0.0442779	> 0.05	false	0.42626	4.95803	0.169938	> 0.05	false	0.113033	4.53713	0.78704	> 0.05	false
orf19.117		Ortholog(s) have SNAP receptor activity, role in vesicle fusion and SNARE complex, extrinsic to plasma membrane localization	0.848241	7.04493	0.00438314	0.0165685	false	0.904701	7.15451	0.00336953	0.01046	false	0.716948	7.09315	0.0173525	0.0357339	false	0.203539	6.09385	0.431139	0.0357339	false
orf19.1170	ARO7	Putative chorismate mutase; fungal-specific (no human or murine homolog); alkaline upregulated	0.664129	6.3814	0.0242714	> 0.05	false	1.02432	6.68568	0.00025846	0.00111188	false	1.10995	6.80179	0.000120786	0.000434646	false	0.272979	7.03781	0.309849	0.000434646	false
orf19.1171		Ortholog of C. parapsilosis CDC317 : CPAR2_208080, Candida tenuis NRRL Y-1498 : CANTEDRAFT_120956, Debaryomyces hansenii CBS767 : DEHA2F24508g and Candida dubliniensis CD36 : CD36_10780	-1.16281	3.03287	0.135196	> 0.05	false	-1.4171	3.00748	0.0658061	> 0.05	false	-0.673039	3.34572	0.349859	> 0.05	false	0.238965	1.01614	0.774681	> 0.05	false
orf19.1177		Ortholog of S. cerevisiae Rtt106; histone chaperone that regulates chromatin structure in transcribed and silenced chromosomal regions; affects transcriptional elongation; Hap43-repressed; Spider biofilm repressed	-0.831964	6.09685	0.00387871	0.014924	false	-1.20457	6.04372	1.70191e-05	0.000100339	false	-1.18045	6.11047	5.98485e-05	0.000228824	false	-0.263207	6.07235	0.304948	0.000228824	false
orf19.1178		Putative transcription factor with bZIP DNA-binding motif; Hap43p-repressed gene	0.0108121	3.0362	1	> 0.05	false	-0.478674	2.87107	0.250336	> 0.05	false	-0.510637	2.91884	0.165837	> 0.05	false	0.00346348	1.89837	1	> 0.05	false
orf19.1179		Protein of unknown function; induced in high iron; possibly subject to Kex2 processing; Hap43-repressed	-0.381142	7.28844	0.210764	> 0.05	false	-0.272141	7.40917	0.374189	> 0.05	false	-0.529974	7.35656	0.0807766	> 0.05	false	0.125838	7.19221	0.647913	> 0.05	false
orf19.118	FAD2	Delta-12 fatty acid desaturase, involved in production of linoleic acid, which is a major component of membranes	-1.944	8.44901	2.41825e-09	5.59892e-08	false	-1.39925	8.65195	7.12214e-05	0.000353614	false	-0.610296	8.97416	0.0674036	> 0.05	false	-1.96039	8.40532	5.91221e-09	5.18719e-07	false
orf19.1180		Putative 2-aminoadipate transaminase; rat catheter and Spider biofilm repressed	-0.694102	7.33913	0.0161117	0.0489445	false	-0.685791	7.41446	0.0172956	0.042698	false	-1.30174	7.26626	6.76931e-06	3.1151e-05	false	0.335455	6.22344	0.217	3.1151e-05	false
orf19.1181		Has domain(s) with predicted catalytic activity and membrane localization	5.89685	-0.582473	0.000546044	0.00282469	false	4.98692	-1.14535	0.0140998	0.0358026	false	5.95221	-0.463361	0.000262201	0.000879898	false	-0.941458	-1.53946	0.543289	0.000879898	false
orf19.1182		Ortholog(s) have SNAP receptor activity, phosphatidylinositol-3-phosphate binding activity and role in piecemeal microautophagy of nucleus, vacuole fusion, non-autophagic, vesicle fusion	-0.909796	5.47487	0.00144104	0.00647933	false	-1.16995	5.45893	4.40367e-05	0.000231941	false	-1.36953	5.45972	2.27489e-06	1.14829e-05	false	0.216009	4.73218	0.416616	1.14829e-05	false
orf19.1183		Ortholog(s) have fungal-type vacuole localization	-0.489127	7.07476	0.0815654	> 0.05	false	-1.0232	6.94707	0.000148347	0.000682192	false	-1.75383	6.80205	8.62503e-09	6.68741e-08	false	0.134508	5.85371	0.599633	> 0.05	false
orf19.1185		Ortholog(s) have ubiquitin-protein ligase activity and role in establishment of mitotic spindle orientation, mitotic cell cycle spindle assembly checkpoint, protein autoubiquitination, septin ring assembly	0.221565	6.02288	0.445085	> 0.05	false	0.513145	6.26005	0.0706045	> 0.05	false	0.621885	6.38353	0.0330344	> 0.05	false	0.220297	6.17774	0.395649	> 0.05	false
orf19.1186		Ortholog of Candida dubliniensis CD36 : CD36_60220, Candida tropicalis MYA-3404 : CTRG_03015 and Candida albicans WO-1 : CAWG_05331	-0.0211258	5.84199	0.942874	> 0.05	false	-0.288752	5.7865	0.296895	> 0.05	false	-0.121951	5.92355	0.667296	> 0.05	false	0.408945	5.67146	0.142873	> 0.05	false
orf19.1187	CPH2	Myc-bHLH transcription factor; promotes hyphal growth; directly regulates Tec1 to induce hypha-specific genes; probably homodimeric, phosphorylated; required for colonization of the mouse GI tract; rat catheter and Spider biofilm induced	-0.0459496	8.36683	0.898232	> 0.05	false	0.0269838	8.47575	0.941513	> 0.05	false	-0.301115	8.37785	0.410971	> 0.05	false	-0.0803921	7.99339	0.773178	> 0.05	false
orf19.1189		Protein of unknown function; regulated by yeast-hypha switch; induced by Mnl1 in weak acid stress; 5' UTR intron; repressed by chlamydospore formation in C. albicans and C. dubliniensis; rat catheter, Spider and flow model biofilm induced	-0.203081	7.52799	0.541422	> 0.05	false	-0.105387	7.64676	0.750605	> 0.05	false	0.317882	7.9253	0.367884	> 0.05	false	0.291023	7.45947	0.3169	> 0.05	false
orf19.119		Ortholog(s) have protein C-terminal S-isoprenylcysteine carboxyl O-methyltransferase activity	-0.064024	3.18394	0.950722	> 0.05	false	-0.214874	3.18013	0.694228	> 0.05	false	0.193756	3.44595	0.640724	> 0.05	false	-0.521608	3.95339	0.0848282	> 0.05	false
orf19.1190	STV1	Predicted subunit a of vacuolar proton-translocating ATPase V0 domain, Golgi isoform	-0.673847	8.31202	0.0309008	> 0.05	false	-0.707617	8.37146	0.0224436	> 0.05	false	-1.40665	8.20226	1.44436e-05	6.24985e-05	false	0.542863	7.14126	0.0496949	6.24985e-05	false
orf19.1191		Ortholog(s) have ubiquitin-protein ligase activity, role in ER-associated protein catabolic process and Hrd1p ubiquitin ligase ERAD-L complex, Hrd1p ubiquitin ligase ERAD-M complex, luminal surveillance complex localization	-0.0762	7.19498	0.798623	> 0.05	false	-0.180114	7.2175	0.53496	> 0.05	false	-0.555687	7.11164	0.0609472	> 0.05	false	0.369633	6.75994	0.167939	> 0.05	false
orf19.1192	DNA2	Protein similar to S. cerevisiae Dna2p, which is a DNA replication factor involved in DNA repair; induced under hydroxyurea treatment	0.195915	4.74021	0.589632	> 0.05	false	-0.050522	4.68392	0.879284	> 0.05	false	0.579342	5.08848	0.0743986	> 0.05	false	-0.14753	5.48454	0.596131	> 0.05	false
orf19.1193	GNP1	Similar to asparagine and glutamine permease; fluconazole, caspofungin induced; regulated by Nrg1, Mig1, Tup1, Gcn2, Gcn4, and alkaline regulated by Rim101; repressed during chlamydospore formation; rat catheter, flow model biofilm induced	-0.67838	10.7602	0.0485234	> 0.05	false	-0.995839	10.7188	0.00591481	0.017118	false	-1.4122	10.6512	0.000443745	0.00141438	false	0.305968	9.41431	0.262093	0.00141438	false
orf19.1195		Ortholog(s) have metalloendopeptidase activity, role in cellular iron ion homeostasis, protein processing involved in protein targeting to mitochondrion and mitochondrion localization	-0.223647	6.20673	0.438802	> 0.05	false	-0.0681029	6.35294	0.806046	> 0.05	false	0.305722	6.6068	0.282974	> 0.05	false	0.33214	6.52179	0.239496	> 0.05	false
orf19.1196		Ortholog(s) have protein kinase activity and role in MAPK cascade involved in cell wall biogenesis, protein phosphorylation	-0.00680367	6.95987	0.980619	> 0.05	false	0.099178	7.08624	0.723174	> 0.05	false	-0.384903	6.91413	0.176895	> 0.05	false	0.364771	6.36169	0.178348	> 0.05	false
orf19.1198		Predicted mitochondrial intermembrane space protein of unknown function; possibly an essential gene, disruptants not obtained by UAU1 method	-0.383433	4.67814	0.233304	> 0.05	false	-0.513241	4.69245	0.0975307	> 0.05	false	-0.504677	4.75583	0.094331	> 0.05	false	0.268188	4.06444	0.400401	> 0.05	false
orf19.1199	NOP5	Ortholog of S. cerevisiae Nop58; involved in pre-rRNA process; Tn mutation affects filamentous growth; macrophage/pseudohyphal-induced; physically interacts with TAP-tagged Nop1; Spider biofilm repressed	0.29148	6.877	0.325569	> 0.05	false	-0.0581962	6.76699	0.835256	> 0.05	false	0.960497	7.41418	0.00195176	0.00526895	false	-1.42699	9.20551	6.03401e-05	0.000924938	false
orf19.120		Has domain(s) with predicted protein C-terminal S-isoprenylcysteine carboxyl O-methyltransferase activity, role in C-terminal protein methylation and endoplasmic reticulum, integral to membrane localization	0.868016	2.3978	0.0509404	> 0.05	false	0.683606	2.35698	0.18584	> 0.05	false	1.40786	2.89321	0.000344581	0.00112492	false	-0.198913	2.48792	0.649014	0.00112492	false
orf19.1200		Protein of unknown function; Spider biofilm induced	-0.681422	4.48662	0.105734	> 0.05	false	-0.753824	4.52832	0.0704113	> 0.05	false	-0.391769	4.73534	0.336117	> 0.05	false	-0.738368	4.40787	0.0164702	> 0.05	false
orf19.1201		Ortholog(s) have serine-tRNA ligase activity, role in invasive growth in response to glucose limitation, mitochondrial seryl-tRNA aminoacylation, pseudohyphal growth and mitochondrion localization	-1.10786	6.12584	0.000469834	0.00246487	false	-1.07573	6.2073	0.000566061	0.00224405	false	-1.12543	6.25069	0.000486188	0.00153467	false	-0.499803	5.5862	0.0530279	0.00153467	false
orf19.1202		Ortholog of C. parapsilosis CDC317 : CPAR2_603550, Candida tenuis NRRL Y-1498 : CANTEDRAFT_114325, Debaryomyces hansenii CBS767 : DEHA2G04950g and Candida dubliniensis CD36 : CD36_60350	0.375427	4.2875	0.298712	> 0.05	false	0.125335	4.22237	0.74606	> 0.05	false	0.541026	4.51375	0.109943	> 0.05	false	0.135182	4.9727	0.609247	> 0.05	false
orf19.1203	SRO77	Protein with a predicted role in docking and fusion of post-Golgi vesicles with the plasma membrane; filament induced; fungal-specific (no human or murine homolog)	-0.326469	7.74708	0.306466	> 0.05	false	-0.535253	7.73026	0.0898662	> 0.05	false	-0.948826	7.63369	0.00314978	0.00804702	false	0.359174	7.11011	0.19352	0.00804702	false
orf19.1203.1		Predicted dolichol-phosphate mannosyltransferase subunit; flow model and Spider biofilm repressed	0.268525	6.63551	0.361102	> 0.05	false	0.155477	6.6473	0.583251	> 0.05	false	-0.111214	6.57127	0.704737	> 0.05	false	0.281912	7.3174	0.291802	> 0.05	false
orf19.1204		Phosphorylated protein of unknown function; transcript is upregulated clinical isolates from HIV positive patients with oral candidiasis	-0.177096	6.01921	0.530628	> 0.05	false	-0.15968	6.09944	0.563957	> 0.05	false	-0.579794	5.97384	0.037983	> 0.05	false	0.231558	5.50338	0.360868	> 0.05	false
orf19.1207		Ortholog of Candida dubliniensis CD36 : CD36_33200 and Candida albicans WO-1 : CAWG_03416	5.08962	-1.07513	0.0144657	0.0449101	false	4.63806	-1.32291	0.0463556	> 0.05	false	5.20661	-0.929638	0.00692052	0.0160118	false	1.68685	-1.549	0.219245	0.0160118	false
orf19.1208		Predicted ORF in the Major Repeat Sequence on chromosome 4; member of a family encoded by FGR6-related genes in the RB2 repeat sequence	-0.423032	4.48507	0.194772	> 0.05	false	-0.587628	4.48579	0.0721302	> 0.05	false	-0.633897	4.52809	0.0471026	> 0.05	false	0.482524	3.70671	0.121362	> 0.05	false
orf19.121	ARC18	Putative ARP2/3 complex subunit; mutation confers hypersensitivity to cytochalasin D	-0.328526	5.80342	0.271858	> 0.05	false	-0.353121	5.86414	0.213664	> 0.05	false	-0.613682	5.81415	0.0375607	> 0.05	false	0.348431	5.0284	0.181574	> 0.05	false
orf19.1210		Ortholog(s) have L-aspartate transmembrane transporter activity, L-glutamate transmembrane transporter activity, L-histidine transmembrane transporter activity and L-lysine transmembrane transporter activity, more	0.240904	6.4712	0.386761	> 0.05	false	0.210316	6.52718	0.447426	> 0.05	false	-0.180258	6.38888	0.522977	> 0.05	false	-0.00404356	6.1235	0.989683	> 0.05	false
orf19.1212		Ortholog(s) have FFAT motif binding, phosphatidylinositol binding activity	-0.172867	7.50499	0.569218	> 0.05	false	-0.36795	7.48876	0.206663	> 0.05	false	-0.041769	7.69923	0.895916	> 0.05	false	-0.127516	8.35931	0.640225	> 0.05	false
orf19.1214		Ortholog(s) have metalloaminopeptidase activity, role in protein initiator methionine removal involved in protein maturation and cytosol localization	-0.422877	7.96148	0.169898	> 0.05	false	-0.57542	7.97051	0.0580132	> 0.05	false	-0.93231	7.89599	0.00386313	0.00964409	false	-0.350011	7.91261	0.20276	0.00964409	false
orf19.1215		Ortholog of Candida dubliniensis CD36 : CD36_64550, Candida tropicalis MYA-3404 : CTRG_02747 and Candida albicans WO-1 : CAWG_04972	2.37481	1.48105	0.000385351	0.00207219	false	2.48232	1.64117	4.24633e-05	0.000225076	false	3.17487	2.24245	2.7266e-09	2.31605e-08	false	-0.508991	1.10978	0.271935	> 0.05	false
orf19.1217		Ortholog(s) have ribosome binding, ubiquitin-protein ligase activity, role in chromatin modification, chromatin silencing at telomere, protein ubiquitination, ubiquitin-dependent protein catabolic process and nucleus, ribosome localization	-0.826713	6.17804	0.00455493	0.0171304	false	-0.456599	6.39519	0.101195	> 0.05	false	-0.47486	6.44643	0.0976895	> 0.05	false	-0.34061	6.73718	0.210648	> 0.05	false
orf19.1219		Ortholog of Spathaspora passalidarum NRRL Y-27907 : SPAPADRAFT_149713 and Candida albicans WO-1 : CAWG_04974	-0.780758	4.59171	0.0297253	> 0.05	false	-0.523698	4.76347	0.131898	> 0.05	false	-0.29127	4.92495	0.38921	> 0.05	false	-0.439749	5.17899	0.0889896	> 0.05	false
orf19.122	CDC20	Activator of anaphase-promoting complex/cyclosome; induced under Cdc5 depletion; member of conserved Mcm1 regulon; mRNA expression peaks at cell-cycle G2/M phase; mRNA binds She3 and is localized to buds of yeast cells and to hyphal tips	-0.592778	6.30604	0.0450969	> 0.05	false	-1.21486	6.15905	1.72002e-05	0.000101317	false	-0.88218	6.32781	0.00231386	0.00612742	false	-0.394491	6.91552	0.168273	0.00612742	false
orf19.1220	RVS167	SH3-domain- and BAR domain-containing protein involved in endocytosis; null mutant exhibits defects in hyphal growth, virulence, cell wall integrity, and actin patch localization; cosediments with phosphorylated Myo5p	-0.145734	8.75815	0.646419	> 0.05	false	-0.154361	8.82659	0.627103	> 0.05	false	-0.661887	8.66678	0.041051	> 0.05	false	0.189509	7.60888	0.488412	> 0.05	false
orf19.1221	ALG2	Putative mannosyltransferase involved in cell wall mannan biosynthesis; transcription is elevated in chk1, nik1, and sln1 homozygous null mutants	-0.21826	5.88468	0.440394	> 0.05	false	-0.232419	5.94995	0.402095	> 0.05	false	-0.346876	5.95713	0.220954	> 0.05	false	-0.406922	6.04359	0.111479	> 0.05	false
orf19.1223	DBF2	Essential serine/threonine protein kinase involved in mitotic spindle formation and cytokinesis; required for septum formation, exit from mitosis, and normal hyphal morphogenesis; virulence-group-correlated expression	0.194029	5.71225	0.496008	> 0.05	false	0.128104	5.74976	0.672019	> 0.05	false	0.295573	5.89876	0.322904	> 0.05	false	-0.079609	6.37658	0.769601	> 0.05	false
orf19.1224	FRP3	Putative ammonium transporter; upregulated in the presence of human neutrophils; fluconazole-downregulated; repressed by nitric oxide; Spider biofilm induced; rat catheter biofilm repressed	2.07909	7.95196	1.80245e-07	2.72534e-06	true	2.23156	8.14955	6.04409e-08	7.02125e-07	true	1.49828	7.63362	0.000261075	0.00087656	false	-0.566954	6.80432	0.126852	0.00087656	false
orf19.1225	PEX22	Putative peroxin	0.32769	4.98665	0.27	> 0.05	false	0.587706	5.21039	0.0457206	> 0.05	false	0.693088	5.33281	0.0169768	0.0351121	false	-0.123279	4.35029	0.70088	0.0351121	false
orf19.1227	ZCF4	Putative Zn(II)2Cys6 transcription factor	3.821	2.12129	1.41485e-10	4.38801e-09	false	3.66579	2.07884	9.76768e-10	1.81423e-08	false	3.47894	1.95588	2.37737e-09	2.02975e-08	false	2.68635	0.118576	4.37885e-05	0.00070527	false
orf19.1228	HAP2	CCAAT-binding transcription factor; regulates low-iron induction of FRP1; in these conditions CBF comprises Hap43 and probably Hap2 and Hap3; possibly essential, disruptants not obtained by UAU1 method; Cap1-dependent induction in low iron	1.2932	5.31731	1.06696e-05	9.37346e-05	false	1.36413	5.44205	3.0017e-06	2.19466e-05	false	1.13423	5.3382	7.96987e-05	0.00029772	false	0.008799	5.41309	0.977067	0.00029772	false
orf19.1229		Ortholog(s) have importin-alpha export receptor activity, role in cell division, protein export from nucleus and nuclear membrane localization	-0.811125	6.3337	0.0175125	> 0.05	false	-0.713822	6.4417	0.0241272	> 0.05	false	-0.467726	6.59931	0.153178	> 0.05	false	-0.063814	6.89251	0.849072	> 0.05	false
orf19.123	RCN1	Protein involved in calcineurin-dependent signaling that controls stress response and virulence; inhibits calcineurin function	0.930343	4.37733	0.00713653	0.0249143	false	1.02675	4.5153	0.00245483	0.00800431	false	1.08578	4.61132	0.000909454	0.00265626	false	0.0959721	4.30907	0.740405	0.00265626	false
orf19.1232	VRG4	GDP-mannose transporter; essential; required for glycosylation, hyphal growth; functional homolog of S. cerevisiae Vrg4p, which imports GDP-mannose from cytoplasm to Golgi for protein and lipid mannosylation; no mammalian homolog	0.0594623	6.82307	0.855437	> 0.05	false	-0.0766643	6.82712	0.789332	> 0.05	false	0.30619	7.08548	0.316914	> 0.05	false	-0.337218	8.62348	0.279988	> 0.05	false
orf19.1233	ADE4	Putative phosphoribosylpyrophosphate amidotransferase; flucytosine induced	-2.04563	8.02309	4.88886e-10	1.30218e-08	true	-1.98392	8.10737	5.90159e-10	1.15741e-08	false	-1.402	8.30452	3.01083e-05	0.000122192	false	-1.00583	8.77158	0.000949466	0.00879311	false
orf19.1234	FGR6-10	Protein lacking an ortholog in S. cerevisiae; member of a family encoded by FGR6-related genes in the RB2 repeat sequence; transposon mutation affects filamentous growth	0.235507	4.17473	0.506084	> 0.05	false	0.139986	4.19529	0.68921	> 0.05	false	0.202062	4.28777	0.527137	> 0.05	false	0.123618	3.88977	0.691602	> 0.05	false
orf19.1235	HOM3	Putative L-aspartate 4-P-transferase; fungal-specific (no human or murine homolog); regulated by Gcn2 and Gcn4; early-stage flow model biofilm induced	0.41852	7.98513	0.185698	> 0.05	false	-0.130849	7.76914	0.673769	> 0.05	false	-0.326358	7.73759	0.313952	> 0.05	false	0.361762	7.71707	0.245175	> 0.05	false
orf19.1236	GVP36	BAR domain protein; ocalizes to early and late Golgi vesicles; predicted role in adaptation to varying nutrient concentrations, fluid-phase endocytosis, actin cytoskeleton polarization and vacuole biogenesis; rat catheter biofilm repressed	-0.265095	6.9224	0.345751	> 0.05	false	-0.0363069	7.10341	0.897542	> 0.05	false	-0.189312	7.0884	0.50592	> 0.05	false	-0.020988	7.27448	0.938803	> 0.05	false
orf19.1237	ARO9	Aromatic transaminase; Ehrlich fusel oil pathway of aromatic alcohol biosynthesis; Rim101-dependent pH-regulation (alkaline induced); Hap43-induced gene	0.659956	4.83888	0.0275564	> 0.05	false	0.442943	4.78255	0.155855	> 0.05	false	0.516139	4.88368	0.082185	> 0.05	false	0.249016	3.842	0.448852	> 0.05	false
orf19.1238	TUB4	Putative gamma-tubulin; induced upon adherence to polystyrene; transcript regulated by Nrg1 and Mig1; periodic mRNA expression, peak at cell-cycle S/G2 phase	-0.234146	4.07375	0.51846	> 0.05	false	-0.2028	4.15832	0.558709	> 0.05	false	-0.160243	4.23785	0.616628	> 0.05	false	0.174949	4.96254	0.516807	> 0.05	false
orf19.1239		Secreted protein; exogenously expressed protein is a substrate for Kex2 processing in vitro; fluconazole-regulated; Spider biofilm induced	6.96994	0.215313	4.26167e-07	5.81121e-06	false	7.75703	0.864234	5.83633e-07	5.21671e-06	false	9.85987	2.84187	6.22966e-13	8.76359e-12	false	0.949842	-1.54252	0.539342	> 0.05	false
orf19.124	CIC1	Putative proteasome-interacting protein; rat catheter biofilm induced	1.91173	3.49287	4.0532e-05	0.000306773	false	2.10794	3.72784	6.81923e-06	4.46666e-05	false	3.43016	4.89591	7.56282e-17	1.854e-15	true	-1.91675	6.76539	6.07368e-05	0.000928883	false
orf19.1240		Ortholog of S. cerevisiae : YPR117W, C. glabrata CBS138 : CAGL0D04510g, C. parapsilosis CDC317 : CPAR2_500480 and Candida tenuis NRRL Y-1498 : CANTEDRAFT_120679	-1.20647	7.33185	8.48822e-05	0.000560391	false	-1.24068	7.3935	2.23097e-05	0.000127364	false	-0.709413	7.63227	0.0270696	> 0.05	false	-0.241354	6.96929	0.374812	> 0.05	false
orf19.1244	GYP2	Ortholog(s) have Rab GTPase activator activity, role in intracellular protein transport and cell division site, cytosol localization	0.174993	6.93063	0.562786	> 0.05	false	0.320217	7.0821	0.277983	> 0.05	false	0.51856	7.25438	0.0909978	> 0.05	false	0.217961	7.38086	0.418565	> 0.05	false
orf19.1246		Putative eisosome component role in proper eisosome assembly; upregulated in cyr1 null mutant	-0.593593	8.89408	0.0673444	> 0.05	false	-0.788556	8.89186	0.0151057	0.0378665	false	-1.3153	8.77863	8.51837e-05	0.00031679	false	0.0508431	8.00684	0.851384	0.00031679	false
orf19.1247		Ortholog of C. parapsilosis CDC317 : CPAR2_500450, Candida tenuis NRRL Y-1498 : CANTEDRAFT_103249, Debaryomyces hansenii CBS767 : DEHA2C07524g and Candida dubliniensis CD36 : CD36_45230	-0.119171	4.64875	0.704468	> 0.05	false	-0.495084	4.54886	0.118419	> 0.05	false	-0.802309	4.48698	0.00982438	0.0217855	false	-0.237577	4.4149	0.393804	0.0217855	false
orf19.1248		Putative RNA polymerase II subunit B44; heterozygous null mutant exhibits resistance to parnafungin in the C. albicans fitness test; Spider biofilm repressed	-0.666032	7.14845	0.0208634	> 0.05	false	-0.798621	7.17048	0.00408993	0.0123962	false	-0.9851	7.16374	0.0005633	0.00173732	false	-0.22356	7.13634	0.40928	0.00173732	false
orf19.1249		Ortholog(s) have 1-(5-phosphoribosyl)-5-[(5-phosphoribosylamino)methylideneamino]imidazole-4-carboxamide isomerase activity, role in histidine biosynthetic process and cytosol, nucleus localization	-0.0408121	5.42577	0.889734	> 0.05	false	-0.305306	5.3721	0.284264	> 0.05	false	-0.396798	5.39056	0.16344	> 0.05	false	-0.256837	5.3047	0.316815	> 0.05	false
orf19.125	EBP1	NADPH oxidoreductase; interacts with phenolic substrates (17beta-estradiol); possible role in estrogen response; induced by oxidative, weak acid stress, NO, benomyl, GlcNAc; Cap1, Mnl1 induced; Hap43-repressed; rat catheter biofilm induced	3.67879	6.68698	1.59895e-29	7.10786e-27	true	3.12965	6.25913	5.86712e-14	2.27453e-12	true	2.26752	5.57731	3.32355e-12	4.18931e-11	true	0.791564	3.44738	0.0971772	> 0.05	false
orf19.1250		Ortholog(s) have role in maturation of SSU-rRNA from tricistronic rRNA transcript (SSU-rRNA, 5.8S rRNA, LSU-rRNA) and cytoplasm, nucleolus localization	1.0573	4.80424	0.000551261	0.00284505	false	0.981003	4.82734	0.00103563	0.00379427	false	1.69311	5.39245	1.35241e-08	1.01097e-07	false	-1.36488	5.92702	1.39974e-05	0.000272909	false
orf19.1251	BRN1	Putative condensin complex subunit; cell-cycle regulated periodic mRNA expression	0.291228	4.68452	0.372174	> 0.05	false	0.217363	4.71605	0.482362	> 0.05	false	0.545997	4.9612	0.063396	> 0.05	false	-0.377799	5.66393	0.18675	> 0.05	false
orf19.1252	YME1	Ortholog(s) have ATP-dependent peptidase activity, role in chronological cell aging, misfolded or incompletely synthesized protein catabolic process, mitochondrion organization and i-AAA complex localization	-0.506104	8.71361	0.11083	> 0.05	false	-0.259157	8.89341	0.415898	> 0.05	false	-0.376039	8.89993	0.250263	> 0.05	false	0.170448	8.21367	0.552331	> 0.05	false
orf19.1253	PHO4	bHLH transcription factor of the myc-family; required for growth in medium lacking phosphate and for resistance to copper and Phloxine B; induced by Mnl1 under weak acid stress	-0.757881	6.75237	0.0151412	0.0464831	false	-0.669146	6.85795	0.0239382	> 0.05	false	-0.37754	7.03714	0.217196	> 0.05	false	-1.27572	7.29941	1.00948e-05	0.00021369	false
orf19.1254	SEC23	Putative GTPase-activating protein; regulated upon yeast-hypha switch; Spider biofilm repressed	0.20375	9.56433	0.534127	> 0.05	false	0.0842895	9.5742	0.796282	> 0.05	false	-0.285332	9.45429	0.392042	> 0.05	false	0.190802	9.68494	0.480976	> 0.05	false
orf19.1255	ZCF5	Zn(II)2Cys6 transcription factor; colony morphology-related gene regulation by Ssn6	0.924052	3.7784	0.0280046	> 0.05	false	1.03063	3.92432	0.0148662	0.0373081	false	0.760851	3.80238	0.0610637	> 0.05	false	-0.650758	1.80889	0.102499	> 0.05	false
orf19.1257		Ortholog of Candida albicans WO-1 : CAWG_03251	-0.188409	0.570477	0.911685	> 0.05	false	-1.90028	0.0698039	0.0146159	0.0367909	false	-1.1069	0.35902	0.132137	> 0.05	false	-1.20292	-1.71619	0.483924	> 0.05	false
orf19.1258		Adhesin-like protein; regulated by Tsa1, Tsa1B in minimal media at 37 deg; clade-associated gene expression; induced by alpha pheromone in SpiderM medium; Hap43-induced; Spider biofilm repressed	-1.34438	4.54751	6.21126e-05	0.000433683	false	-1.58644	4.54863	3.4547e-05	0.000186375	false	-1.41388	4.65766	3.07918e-05	0.000124587	false	-1.85377	4.00851	1.34694e-05	0.00026651	false
orf19.1259		Ortholog(s) have DNA binding activity and Lid2 complex, Snt2C complex, spindle pole body localization	-0.196466	6.9035	0.481791	> 0.05	false	0.114935	7.12973	0.678514	> 0.05	false	-0.0201333	7.11956	0.943392	> 0.05	false	-0.162617	7.28745	0.548954	> 0.05	false
orf19.1260	LEA1	Predicted component of U2 snRNP; induced by alpha pheromone in SpiderM medium	-0.591673	4.44448	0.133525	> 0.05	false	-0.456235	4.57041	0.237248	> 0.05	false	0.347578	5.02653	0.310906	> 0.05	false	0.01779	5.32174	0.949476	> 0.05	false
orf19.1261	CGT1	mRNA 5' guanylyltransferase; small subunit of mRNA capping enzyme; binds an RNA Pol II C-terminal domain peptide; Cet1p and Cgt1p form a 2:1 complex; functional homolog of S. cerevisiae Ceg1p	0.588264	5.71308	0.0355564	> 0.05	false	0.861059	5.95616	0.00208716	0.00697953	false	1.03935	6.13174	0.000352199	0.00114447	false	-0.196753	6.4222	0.461557	0.00114447	false
orf19.1263	CFL1	Protein similar to ferric reductase Fre10p; possible functional homolog of S. cerevisiae Fre1p (reports differ); transcription is negatively regulated by Sfu1p, copper, amphotericin B, caspofungin; induced by ciclopirox olamine	-0.435446	5.61716	0.277401	> 0.05	false	-0.34577	5.72802	0.386262	> 0.05	false	-0.451217	5.74109	0.261023	> 0.05	false	-1.03714	5.74214	0.000229426	0.00271726	false
orf19.1264	CFL2	Oxidoreductase; iron utilization; Sfu1/Sef1/Hap43/Nrg1/Tup1/Rim101 regulated; alkaline/low iron/fluphenazine/ciclopirox olamine, flucytosine, fluconazole, Spider/flow model/rat catheter biofilm induced; caspofungin/amphotericin B repressed	1.33399	6.52363	0.000338901	0.00185686	false	0.885109	6.29	0.0152461	0.0381754	false	1.38159	6.69026	0.000464447	0.00147193	false	-0.992528	9.16911	0.000266261	0.00309848	false
orf19.1265		Ortholog(s) have Rab guanyl-nucleotide exchange factor activity and role in early endosome to Golgi transport, intra-Golgi vesicle-mediated transport, regulation of Rab GTPase activity	0.0394045	6.07262	0.909326	> 0.05	false	-0.145461	6.05343	0.63096	> 0.05	false	-0.0296655	6.16888	0.92083	> 0.05	false	0.219701	6.55416	0.43653	> 0.05	false
orf19.1266		Protein of unknown function; transcript detected on high-resolution tiling arrays	0.91568	4.70173	0.00856081	0.028947	false	0.806521	4.70522	0.0206362	0.049856	false	0.197126	4.40591	0.577528	> 0.05	false	0.330288	3.39619	0.295885	> 0.05	false
orf19.1267		Has domain(s) with predicted heat shock protein binding, unfolded protein binding activity and role in protein folding	0.663901	8.26795	0.0341352	> 0.05	false	0.805448	8.42908	0.0100662	0.0269025	false	0.0176592	8.03797	0.95629	> 0.05	false	-0.020221	6.7489	0.942054	> 0.05	false
orf19.1267.1		Ortholog(s) have enzyme activator activity, role in iron-sulfur cluster assembly and extrinsic to mitochondrial inner membrane, mitochondrial matrix localization	-0.641165	5.90661	0.0321563	> 0.05	false	-0.300499	6.12206	0.299488	> 0.05	false	-0.381753	6.14504	0.205388	> 0.05	false	0.0345373	5.7809	0.898108	> 0.05	false
orf19.1268		Protein of unknown function; transcript detected on high-resolution tiling arrays; rat catheter biofilm induced	2.04468	0.119214	0.0134973	0.0424329	false	2.89023	0.819315	9.63622e-05	0.000466625	false	2.91805	0.880395	5.81743e-05	0.000223063	false	-0.362066	-0.13722	0.595094	0.000223063	false
orf19.1270	FRE3	Protein with similarity to ferric reductase Fre10p; possibly an essential gene, disruptants not obtained by UAU1 method	1.67601	3.78894	1.73474e-05	0.000143514	false	2.12977	4.21963	6.80747e-08	7.79934e-07	true	2.3967	4.48902	8.00857e-11	8.40963e-10	true	-0.42655	2.95837	0.256736	> 0.05	false
orf19.1272		Protein of unknown function; may play a role in regulation of cell size; rat catheter biofilm repressed	-1.91273	6.77227	5.17426e-11	1.74252e-09	false	-1.93458	6.83889	1.37501e-11	3.62394e-10	false	-1.68317	6.95454	4.27834e-09	3.48753e-08	false	-0.786093	6.01513	0.00273296	0.0205914	false
orf19.1273		Ortholog(s) have tubulin binding activity, role in tubulin complex assembly and prefoldin complex localization	-0.301826	4.72645	0.333176	> 0.05	false	-0.256716	4.81796	0.395357	> 0.05	false	0.0281267	5.01555	0.922659	> 0.05	false	-0.038614	4.79954	0.888996	> 0.05	false
orf19.1274		Has domain(s) with predicted DNA binding, zinc ion binding activity, role in transcription, DNA-dependent and nucleus localization	0.65748	0.665109	0.287416	> 0.05	false	1.23601	1.08169	0.032626	> 0.05	false	0.723037	0.829106	0.174472	> 0.05	false	-1.02761	-0.454133	0.15309	> 0.05	false
orf19.1275	GAT1	GATA-type transcription factor; regulator of nitrogen utilization; required for nitrogen catabolite repression and utilization of isoleucine, tyrosine and tryptophan N sources; required for virulence in a mouse systemic infection model	-0.81855	7.17385	0.00441133	0.0166467	false	0.0657992	7.63226	0.827512	> 0.05	false	-0.735872	7.33541	0.0108402	0.023738	false	1.03638	4.28856	0.000481031	0.00501959	false
orf19.1276		Protein with a selenoprotein domain and a thioredoxin-like fold domain; similar to S. cerevisiae Vhs3p, which is a putative phosphopantothenoylcysteine decarboxylase	-0.131998	4.08117	0.711316	> 0.05	false	-0.117358	4.1587	0.739127	> 0.05	false	-0.128151	4.21319	0.69814	> 0.05	false	0.389895	3.67257	0.211607	> 0.05	false
orf19.1277		Protein of unknown function; Rgt1, Hap43-repressed; flow model biofilm induced; Spider biofilm induced	-0.353496	6.7245	0.236871	> 0.05	false	-0.229914	6.85249	0.405572	> 0.05	false	-0.334402	6.86397	0.244062	> 0.05	false	1.12614	6.18689	0.0390708	> 0.05	false
orf19.1279	CDS1	Protein similar to S. cerevisiae Cds1p; transposon mutation affects filamentous growth	-0.471525	7.11269	0.107008	> 0.05	false	-0.419747	7.20691	0.161931	> 0.05	false	-0.631785	7.17838	0.0349391	> 0.05	false	-0.409635	6.87538	0.132163	> 0.05	false
orf19.1280	SUI1	Putative translation initiation factor; flucytosine induced; genes encoding ribosomal subunits, translation factors, and tRNA synthetases are downregulated upon phagocytosis by murine macrophage	0.43913	8.42644	0.19006	> 0.05	false	0.617525	8.60448	0.0618706	> 0.05	false	0.644634	8.67948	0.0574735	> 0.05	false	-0.0308138	9.11573	0.910449	> 0.05	false
orf19.1281		Putative splicing factor required for the first step of pre-mRNA splicing; Spider biofilm induced	0.950303	4.52771	0.00299752	0.0120045	false	1.06534	4.67852	0.000670716	0.00260626	false	1.21315	4.83688	6.30691e-05	0.0002399	false	-0.33463	5.06311	0.193626	0.0002399	false
orf19.1282	CKS1	Ortholog(s) have histone binding, protein kinase activator activity, ubiquitin binding activity	0.217228	5.71891	0.444065	> 0.05	false	0.663088	6.04872	0.0176004	0.0434183	false	0.483442	5.99939	0.0892452	> 0.05	false	0.294407	6.34216	0.273227	> 0.05	false
orf19.1283	MEC1	Cell cycle checkpoint protein with a role in genome integrity; RNA abundance regulated by tyrosol and cell density	0.664826	6.77476	0.0230921	> 0.05	false	0.443074	6.71554	0.115383	> 0.05	false	1.15008	7.22227	6.36336e-05	0.000241496	false	0.184533	6.60201	0.490709	0.000241496	false
orf19.1285		Plasma membrane-localized protein of unknown function; Hap43p-repressed gene	-1.10703	7.09279	0.000163486	0.000991926	false	-0.935957	7.22141	0.00126077	0.00447407	false	-1.11433	7.22142	0.000189064	0.000653541	false	-0.0248389	6.46775	0.92825	0.000653541	false
orf19.1286		Ortholog of Candida albicans WO-1 : CAWG_04776	3.24305	1.25966	3.57737e-06	3.61423e-05	false	3.20339	1.31759	3.85795e-06	2.71359e-05	false	4.51599	2.48387	9.18346e-15	1.65501e-13	false	3.1558	0.243943	5.93479e-06	0.00014033	false
orf19.1287		Protein of unknown function; flow model biofilm induced; Spider biofilm induced	1.52365	3.43234	0.00165605	0.0072744	false	1.22198	3.29339	0.0110219	0.0290145	false	2.33066	4.18415	8.02961e-08	5.23377e-07	true	-0.691954	6.86891	0.0523747	> 0.05	false
orf19.1288	FOX2	3-hydroxyacyl-CoA epimerase; fatty acid beta-oxidation; induced by phagocytosis; regulated by Mig1, by white-opaque switch, by DNA methylation; transcriptional activation by oleate requires Ctf1; rat catheter and Spider biofilm induced	0.723307	7.81289	0.0801235	> 0.05	false	1.26638	8.24729	0.00275818	0.0088506	false	0.748117	7.95956	0.0788766	> 0.05	false	1.05893	6.38976	0.0014362	0.0123729	false
orf19.1289	SCT1	Putative glycerol-3-phosphate O-acyltransferase; fungal-specific (no human or murine homolog)	-1.09066	7.13873	0.000195132	0.00116069	false	-0.977433	7.24795	0.000535058	0.00213639	false	-1.27415	7.21323	9.02609e-06	4.04946e-05	false	-0.162935	6.79997	0.542885	4.04946e-05	false
orf19.1290	XKS1	Putative xylulokinase; Hap43-repressed; induced by prostaglandins; rat catheter biofilm repressed	-1.78091	8.06181	2.34265e-08	4.43772e-07	false	-2.33234	8.02627	4.89961e-13	1.65841e-11	true	-2.70341	8.02985	7.97889e-16	1.66781e-14	true	1.15338	6.25552	0.000382591	0.00416849	false
orf19.1291	ABZ1	Ortholog(s) have 4-amino-4-deoxychorismate synthase activity, role in para-aminobenzoic acid biosynthetic process and cytosol, nucleus localization	-0.34969	5.36339	0.22731	> 0.05	false	-0.257958	5.47617	0.366009	> 0.05	false	-0.112073	5.60409	0.701565	> 0.05	false	-0.370715	6.06062	0.147884	> 0.05	false
orf19.1295	VAS1	Putative tRNA-Val synthetase; genes encoding ribosomal subunits, translation factors, and tRNA synthetases are downregulated upon phagocytosis by murine macrophage	-0.0450907	8.57253	0.886877	> 0.05	false	-0.743408	8.34265	0.0163582	0.0406699	false	-0.353483	8.55996	0.270347	> 0.05	false	-0.577778	9.38656	0.0361817	> 0.05	false
orf19.1296		Ortholog(s) have role in spliceosomal snRNP assembly and U4/U6 x U5 tri-snRNP complex, mitochondrion localization	0.575241	4.25967	0.101518	> 0.05	false	0.687704	4.40141	0.0491488	> 0.05	false	0.734841	4.48935	0.027678	> 0.05	false	-0.572211	5.20183	0.0364693	> 0.05	false
orf19.1297		Ortholog(s) have phosphatidylinositol-3-phosphate binding activity and role in CVT pathway, early endosome to Golgi transport, macroautophagy, mitochondrion degradation	0.88929	5.496	0.00186778	0.00808201	false	1.03553	5.66607	0.0003667	0.00152441	false	0.84697	5.60007	0.00388951	0.00969398	false	0.640755	4.55419	0.0312491	0.00969398	false
orf19.1298	NUP84	Ortholog(s) have structural constituent of nuclear pore activity	0.257	5.81986	0.36984	> 0.05	false	0.510302	6.03619	0.0676812	> 0.05	false	0.597527	6.14645	0.0366685	> 0.05	false	-0.338173	6.82323	0.237086	> 0.05	false
orf19.1299	RPN6	Putative 26S proteasome subunit; Hap43p-induced gene; regulated by Gcn2p and Gcn4p	-0.952374	7.30364	0.00252216	0.0104006	false	-0.958817	7.37339	0.00106667	0.00388601	false	-1.39801	7.29716	5.11595e-06	2.41766e-05	false	0.168797	6.85346	0.555938	2.41766e-05	false
orf19.130		Ortholog(s) have protein serine/threonine kinase activity, ubiquitin binding activity	-0.150549	6.10126	0.591658	> 0.05	false	-0.160898	6.16837	0.559809	> 0.05	false	-0.169364	6.2235	0.578312	> 0.05	false	0.131958	5.50936	0.605813	> 0.05	false
orf19.1300		Putative mitochondrial membrane protein; homozygous transposon insertion causes decreased colony wrinkling under filamentous growth-inducing conditions, but does not block true hyphal formation in liquid media	0.539464	5.57913	0.0622792	> 0.05	false	0.740152	5.77444	0.00750321	0.0209336	false	1.28212	6.19431	8.37792e-06	3.79056e-05	false	-0.12419	6.28746	0.634851	3.79056e-05	false
orf19.1301		Ortholog(s) have cytoplasm, nucleus, ribosome localization	0.0660758	4.77555	0.850206	> 0.05	false	0.033982	4.83115	0.916929	> 0.05	false	0.00857995	4.87757	0.983839	> 0.05	false	0.517472	5.20796	0.0702275	> 0.05	false
orf19.1302		Ortholog of Candida dubliniensis CD36 : CD36_43500, Spathaspora passalidarum NRRL Y-27907 : SPAPADRAFT_64619, Candida tropicalis MYA-3404 : CTRG_00335 and Candida albicans WO-1 : CAWG_03437	4.21731	-0.00668193	5.84385e-05	0.000412347	false	4.74157	0.481751	7.92747e-07	6.77697e-06	false	5.1829	0.891492	4.81766e-09	3.89856e-08	false	0.996608	-0.0744401	0.115897	> 0.05	false
orf19.1303		Ortholog(s) have translation release factor activity, role in mitochondrial translational termination and mitochondrion localization	-0.270286	4.27175	0.423952	> 0.05	false	-0.152672	4.39739	0.635609	> 0.05	false	0.394916	4.74421	0.191103	> 0.05	false	-0.432998	5.2229	0.0865658	> 0.05	false
orf19.1304		Ortholog(s) have role in U4 snRNA 3'-end processing, exonucleolytic trimming to generate mature 3'-end of 5.8S rRNA from tricistronic rRNA transcript (SSU-rRNA, 5.8S rRNA and LSU-rRNA), more	-0.0584035	3.62777	0.879012	> 0.05	false	0.217236	3.8422	0.565857	> 0.05	false	0.943785	4.3372	0.00516787	0.0124133	false	-1.29174	5.84225	9.23331e-05	0.00130164	false
orf19.1305		Ortholog(s) have tRNA (guanine) methyltransferase activity, role in tRNA methylation and mitochondrial matrix, nucleus localization	-0.0534882	-0.766863	1	> 0.05	false	0.478763	-0.522498	0.690633	> 0.05	false	1.16853	-0.121783	0.187528	> 0.05	false	-0.272161	-1.53952	1	> 0.05	false
orf19.1306		Ortholog(s) have cytosol, nucleus localization	-2.10583	6.01155	4.49746e-12	1.73347e-10	true	-1.70345	6.16798	1.66337e-08	2.24027e-07	false	-1.32074	6.32811	3.71604e-05	0.000147491	false	-1.9851	6.13484	8.86394e-11	1.37453e-08	false
orf19.1307		Predicted membrane protein; rat catheter biofilm induced	0.926331	5.99043	0.00166828	0.00731366	false	1.47378	6.4444	3.28058e-07	3.08097e-06	false	0.513788	5.86492	0.06952	> 0.05	false	0.784891	2.9774	0.0250515	> 0.05	false
orf19.1308		Predicted membrane transporter, member of the drug:proton antiporter (14 spanner) (DHA2) family, major facilitator superfamily (MFS)	-1.55787	6.4698	1.93376e-07	2.8976e-06	false	-1.22349	6.63426	8.044e-05	0.000395848	false	-1.09162	6.73443	0.000642911	0.00195031	false	-0.71103	6.40396	0.00958387	0.00195031	false
orf19.1309		Ortholog of C. parapsilosis CDC317 : CPAR2_403630, Candida tenuis NRRL Y-1498 : CANTEDRAFT_114295, Debaryomyces hansenii CBS767 : DEHA2G17336g and Candida dubliniensis CD36 : CD36_43290	-1.02983	3.30671	0.0128395	0.040749	false	-1.71127	3.16639	2.54797e-05	0.000143374	false	-1.81235	3.20738	2.424e-06	1.21711e-05	false	0.375854	2.99616	0.273638	1.21711e-05	false
orf19.131		Ortholog of C. parapsilosis CDC317 : CPAR2_602800, Candida tenuis NRRL Y-1498 : CANTEDRAFT_94450, Debaryomyces hansenii CBS767 : DEHA2F15554g and Candida dubliniensis CD36 : CD36_61330	0.925671	3.58772	0.0123864	0.0395595	false	0.907831	3.65058	0.0171248	0.0423389	false	1.17452	3.8863	0.00087607	0.00257114	false	-0.13082	3.15953	0.689546	0.00257114	false
orf19.131.2		Ortholog(s) have endoplasmic reticulum localization	-0.812684	6.55897	0.00400074	0.015314	false	-0.996276	6.56628	0.000416558	0.0017114	false	-1.47505	6.48141	5.85193e-07	3.33795e-06	false	-0.219389	6.24907	0.422002	3.33795e-06	false
orf19.1310		Ortholog(s) have role in nucleotide-excision repair and nucleus localization	-0.56109	4.39591	0.088932	> 0.05	false	-0.473172	4.50233	0.145326	> 0.05	false	-0.143652	4.71128	0.634355	> 0.05	false	-0.0231384	4.3282	0.940938	> 0.05	false
orf19.1311	SPO75	Ortholog(s) have role in ascospore wall assembly	0.665917	0.358129	0.363661	> 0.05	false	1.82695	1.17589	0.00243393	0.00796342	false	1.44555	0.95709	0.0153638	0.032094	false	0.530587	0.128571	0.418063	0.032094	false
orf19.1313	CDR3	Transporter of the Pdr/Cdr family of the ATP-binding cassette superfamily; transports phospholipids out-to-in; expressed in opaque-phase cells; induced by macrophage interaction; fluconazole-repressed; Spider biofilm induced	0.489561	4.51583	0.13635	> 0.05	false	0.539145	4.61786	0.0886312	> 0.05	false	1.45075	5.2806	1.34581e-06	7.12212e-06	false	-0.640741	4.61797	0.0322186	7.12212e-06	false
orf19.1314		Protein of unknown function; planktonic growth-induced gene	-0.709831	6.78722	0.01884	> 0.05	false	-0.977689	6.76281	0.000907833	0.00339699	false	-1.51417	6.66167	1.13632e-06	6.08865e-06	false	0.765358	4.7338	0.0099248	6.08865e-06	false
orf19.1317	OSH3	Protein required for wild-type filamentation; has oxysterol binding protein domain and pleckstrin homology motif; overproducton suppresses cph1 homozygous null filamnetation defect; similar to S. cerevisiae Osh3p	-0.43156	8.05519	0.167586	> 0.05	false	-0.49253	8.10188	0.110516	> 0.05	false	-0.681342	8.08496	0.0333578	> 0.05	false	-0.121683	7.41542	0.652398	> 0.05	false
orf19.1318		Ortholog of C. parapsilosis CDC317 : CPAR2_403560, Debaryomyces hansenii CBS767 : DEHA2A08250g, Candida dubliniensis CD36 : CD36_43350 and Pichia stipitis Pignal : PICST_29838	0.903002	4.81376	0.00400845	0.0153347	false	1.04752	4.98329	0.000853058	0.00321912	false	0.791644	4.87363	0.0118694	0.0257049	false	0.152469	4.93736	0.562271	0.0257049	false
orf19.132		Ortholog(s) have role in histone deacetylation, negative regulation of chromatin silencing at telomere, negative regulation of meiosis, positive regulation of stress-activated MAPK cascade	-0.396678	6.85275	0.178352	> 0.05	false	-0.124079	7.04937	0.66064	> 0.05	false	-0.377608	6.99194	0.19178	> 0.05	false	0.133223	6.69434	0.626285	> 0.05	false
orf19.1321	HWP1	Hyphal cell wall protein; host transglutaminase substrate; opaque-, a-specific, alpha-factor induced; at MTLa side of conjugation tube; virulence complicated by URA3 effects; Bcr1-repressed in RPMI a/a biofilms; Spider biofilm induced	1.24881	4.59437	0.00492008	0.0183382	false	3.61865	6.63325	8.68189e-16	4.35269e-14	true	5.89508	8.87037	2.6177e-29	2.72731e-27	true	0.362642	6.81048	0.230162	> 0.05	false
orf19.1323		Phosphorylated protein of unknown function; Hap43p-repressed gene	-0.470158	6.97581	0.106299	> 0.05	false	-0.364569	7.09333	0.203484	> 0.05	false	-0.686713	7.0196	0.0191884	0.0389492	false	0.170816	6.62255	0.52116	0.0389492	false
orf19.1324	RAD2	Ortholog of S. cerevisiae Rad2, a nucleotide excision repair nuclease; null mutant is extremely sensitive to UV irradiation; transcript induced by interaction with macrophages	-0.379545	6.04325	0.194009	> 0.05	false	-0.281356	6.15877	0.318665	> 0.05	false	-0.0539761	6.32545	0.85204	> 0.05	false	0.0253992	5.59881	0.925234	> 0.05	false
orf19.1325	ECM38	Putative gamma-glutamyltransferase; alkaline upregulated; Spider biofilm induced; possibly an essential gene, disruptants not obtained by UAU1 method	0.126067	5.52001	0.663782	> 0.05	false	0.282565	5.67646	0.316429	> 0.05	false	0.797682	6.04073	0.0105981	0.0232921	false	0.699421	3.63699	0.0630349	0.0232921	false
orf19.1326		Ortholog of Candida albicans WO-1 : CAWG_03455	-0.064248	4.439	0.883766	> 0.05	false	-0.213072	4.43931	0.564562	> 0.05	false	0.310478	4.7669	0.340608	> 0.05	false	-0.267541	4.19727	0.375447	> 0.05	false
orf19.1327	RBT1	Cell wall protein with similarity to Hwp1; required for virulence; predicted glycosylation; fluconazole, Tup1 repressed; farnesol, alpha factor, serum, hyphal and alkaline induced; Rfg1, Rim101-regulated	2.80525	5.28725	1.52667e-12	6.46878e-11	true	4.14667	6.58162	3.29017e-33	9.14118e-31	true	5.12706	7.57609	4.2551e-41	1.23361e-38	true	-0.191702	5.95937	0.680244	> 0.05	false
orf19.133		Protein of unknown function; induced by nitric oxide independent of Yhb1p	-0.210456	3.44837	0.578804	> 0.05	false	-0.46701	3.40019	0.219984	> 0.05	false	-0.947443	3.27248	0.00786805	0.0179242	false	-0.151771	2.71729	0.676461	0.0179242	false
orf19.1330		Ortholog of Candida albicans WO-1 : CAWG_05678	1.74122	2.9011	6.97381e-05	0.000477427	false	1.42767	2.7503	0.000901526	0.00338098	false	1.68261	2.98759	2.14131e-05	8.95187e-05	false	0.154277	1.49971	0.741805	8.95187e-05	false
orf19.1331	HSM3	Ortholog(s) have role in mismatch repair, proteasome regulatory particle assembly and cytosol, nucleus, proteasome regulatory particle, base subcomplex localization	-0.426166	7.11639	0.124227	> 0.05	false	-0.509298	7.15355	0.0623415	> 0.05	false	-0.941939	7.04871	0.000916846	0.00267668	false	0.998263	5.46606	0.000345276	0.00383078	false
orf19.1332	SNG4	Putative membrane transporter; Hap43-induced; inducd by Mnl1p under weak acid stress; shows Mob2-dependent hyphal regulation	0.378248	5.72482	0.232715	> 0.05	false	0.577091	5.91347	0.0655144	> 0.05	false	0.836397	6.13223	0.00927844	0.0207543	false	-0.220842	6.15356	0.404387	0.0207543	false
orf19.1333	SNG3	Putative membrane transporter; Hap43p-induced gene; mutation confers hypersensitivity to toxic ergosterol analog; shows colony morphology-related gene regulation by Ssn6p	0.225915	5.665	0.486931	> 0.05	false	0.114047	5.67825	0.708473	> 0.05	false	0.662749	6.04807	0.0397531	> 0.05	false	-0.880443	6.1686	0.00178889	0.01469	false
orf19.1334		Protein of unknown function; repressed by alpha pheromone in SpiderM medium	-0.29564	5.58004	0.317072	> 0.05	false	-0.543877	5.54414	0.058265	> 0.05	false	-0.0521345	5.82611	0.864983	> 0.05	false	-0.368579	5.41469	0.217128	> 0.05	false
orf19.1335		Ortholog of S. cerevisiae Mtr4, an ATP-dependent 3'-5' RNA helicase of the DEAD-box family; Hap43-induced gene; Spider biofilm induced	0.966292	5.22595	0.00193817	0.00832716	false	1.14074	5.41699	8.75022e-05	0.000428074	false	1.90873	6.04206	5.53463e-10	5.13281e-09	false	-1.35399	7.71852	0.000103695	0.00141398	false
orf19.1336	PUP3	Putative beta 3 subunit of the 20S proteasome; macrophage/pseudohyphal-repressed	-0.77238	7.84987	0.0125475	0.0399555	false	-0.801829	7.91129	0.00829398	0.0228247	false	-1.37759	7.7852	1.60034e-05	6.83604e-05	false	0.129959	7.24651	0.633233	6.83604e-05	false
orf19.1336.2		Ortholog(s) have role in mitochondrial respiratory chain complex assembly and mitochondrial intermembrane space, nucleus localization	0.019648	4.54783	0.947121	> 0.05	false	0.33658	4.78935	0.277921	> 0.05	false	0.649863	5.03157	0.0323714	> 0.05	false	0.151749	5.42155	0.567468	> 0.05	false
orf19.1338		Protein of unknown function; possible COPI-coated vesicle, Golgi apparatus, ribosome localization; rat catheter biofilm repressed	-0.462638	6.97538	0.0966916	> 0.05	false	-0.63151	6.97858	0.0227022	> 0.05	false	-0.946204	6.92167	0.000843053	0.00248848	false	0.189846	6.63735	0.486963	0.00248848	false
orf19.1339	CPY1	Carboxypeptidase Y; transcript regulated at yeast-hypha transition or macrophage response; induced human neutrophils; regulated by Gcn2 and Gcn4; putative N-glycosylation	-0.697027	9.57795	0.0336995	> 0.05	false	-0.286029	9.82146	0.386004	> 0.05	false	-0.92176	9.62737	0.00746587	0.0171074	false	0.429432	8.17385	0.126497	0.0171074	false
orf19.134		Protein of unknown function; overlaps retrotransposon Tca13; ciclopirox olamine induced	-0.485364	3.68468	0.212797	> 0.05	false	-0.858687	3.60215	0.034509	> 0.05	false	-1.04519	3.59721	0.00587211	0.0138456	false	-0.30785	2.96605	0.355852	0.0138456	false
orf19.1340		Putative aldose reductase; protein level decreases in stationary phase cultures; Spider biofilm repressed	0.964314	6.13225	0.0014155	0.00639467	false	0.62342	5.989	0.0382245	> 0.05	false	0.0768741	5.74018	0.81004	> 0.05	false	0.893387	4.84099	0.00277475	0.0208356	false
orf19.1341	PRR2	Putative serine/threonine protein kinase; mutation confers resistance to 5-fluorocytosine (5-FC)	-0.0206351	4.44541	0.952918	> 0.05	false	0.225681	4.64571	0.503675	> 0.05	false	-0.532336	4.34026	0.104639	> 0.05	false	0.228607	3.32078	0.455344	> 0.05	false
orf19.1342	SHM1	Mitochondrial serine hydroxymethyltransferase; complements the glycine auxotrophy of an S. cerevisiae shm1 null shm2 null gly1-1 triple mutant; protein present in exponential and stationary growth phase yeast cultures	0.192109	8.11168	0.538593	> 0.05	false	-0.401594	7.89763	0.185859	> 0.05	false	-0.233809	8.03116	0.458478	> 0.05	false	-0.427827	8.87187	0.119852	> 0.05	false
orf19.1343	MED16	Putative RNA polymerase II mediator complex subunit; induced by nitric oxide	-0.389315	6.50038	0.178951	> 0.05	false	-0.284128	6.61911	0.312529	> 0.05	false	-0.583251	6.55009	0.0413084	> 0.05	false	0.342582	6.3614	0.201316	> 0.05	false
orf19.1344		Protein of unknown function; fluconazole-induced; Spider biofilm induced	-0.611258	6.54951	0.275107	> 0.05	false	-0.874493	6.52134	0.118812	> 0.05	false	-1.09466	6.50527	0.057314	> 0.05	false	-2.59209	4.10102	1.59564e-07	9.13761e-06	true
orf19.1345	LIP8	Secreted lipase, member of a differentially expressed lipase gene family with possible roles in nutrition and/or in creating an acidic microenvironment; LIP5 and LIP8 are expressed at all stages of both mucosal and systemic infection	0.00590613	0.484851	1	> 0.05	false	-0.288502	0.401921	0.73044	> 0.05	false	-0.514336	0.383889	0.506825	> 0.05	false	-0.688395	-1.03984	0.507829	> 0.05	false
orf19.1348		Ortholog of Candida dubliniensis CD36 : CD36_22500, Candida tropicalis MYA-3404 : CTRG_01825 and Candida albicans WO-1 : CAWG_05921	5.04009	0.647153	4.78462e-08	8.55331e-07	false	5.60209	1.20808	7.8498e-10	1.4955e-08	false	5.44517	1.11443	3.2833e-10	3.13654e-09	false	3.7426	-0.349743	0.000688725	0.0068238	false
orf19.1349		Ortholog of Candida dubliniensis CD36 : CD36_22470, Candida tropicalis MYA-3404 : CTRG_01829 and Candida albicans WO-1 : CAWG_05920	3.22877	2.69048	5.34447e-09	1.1646e-07	false	3.48986	3.00498	3.20337e-10	6.67503e-09	false	2.66207	2.33837	6.37928e-07	3.60178e-06	false	0.500974	-0.623745	0.602373	3.60178e-06	false
orf19.135	EXO84	Predicted subunit of the exocyst complex, involved in exocytosis; localizes to a crescent on the surface of the hyphal tip	0.313643	6.78844	0.266093	> 0.05	false	0.17081	6.7834	0.533311	> 0.05	false	-0.219642	6.64798	0.444997	> 0.05	false	0.531439	5.96808	0.0395212	> 0.05	false
orf19.1350		Protein with a thioredoxin domain; predicted role in cell redox homeostasis; rat catheter and Spider biofilm induced	0.906222	5.24695	0.00757463	0.0261292	false	1.86747	6.01242	2.61897e-08	3.35833e-07	false	1.94427	6.13087	2.18311e-08	1.57033e-07	false	1.17439	3.49111	0.000450719	0.00479329	false
orf19.1351		Ortholog of C. parapsilosis CDC317 : CPAR2_407000, Lodderomyces elongisporus NRLL YB-4239 : LELG_02401, Candida dubliniensis CD36 : CD36_22440 and Candida orthopsilosis Co 90-125 : CORT0C06360	-0.364873	2.29814	0.475137	> 0.05	false	-0.394774	2.34588	0.440629	> 0.05	false	0.298902	2.7568	0.448193	> 0.05	false	-0.222389	3.76756	0.489681	> 0.05	false
orf19.1352	TIM22	Mitochondrial inner membrane protein; predicted role in protein import; Hap43-repressed gene; flow model biofilm induced; Spider biofilm repressed	-0.491068	5.41075	0.1151	> 0.05	false	-1.1743	5.23223	5.86871e-05	0.000296274	false	-0.876387	5.3919	0.00212716	0.00569863	false	-0.34653	5.39397	0.169776	0.00569863	false
orf19.1353		Protein of unknown function; repressed by yeast-hypha switch; Ras1-regulated; oral infection induced; mutants defective in damage to oral epithelium; flow model biofilm induced; Spider biofilm induced	4.73416	-1.25625	0.0419839	> 0.05	false	5.96407	-0.54401	0.000407026	0.00167845	false	6.95162	0.277479	2.85499e-07	1.69822e-06	false	1.53829	-1.30568	0.189169	> 0.05	false
orf19.1354	UCF1	Upregulated by cAMP in filamentous growth; induced in high iron, decreased upon yeast-hypha switch; downregulation correlates with clinical fluconazole resistance; Ras1-regulated; Hap43-repressed; flow model biofilm induced	-0.869115	10.715	0.0226762	> 0.05	false	-1.06412	10.7216	0.00590944	0.0171099	false	-2.30515	10.482	4.6209e-08	3.14731e-07	true	5.97779	6.94612	5.1871e-13	1.33029e-10	true
orf19.1355		Putative protein of unknown function; stationary phase enriched protein	-0.071787	7.54313	0.813145	> 0.05	false	-0.334532	7.49313	0.246242	> 0.05	false	-0.467576	7.49437	0.115443	> 0.05	false	-0.151932	7.68833	0.576375	> 0.05	false
orf19.1356		Ortholog(s) have thiosulfate sulfurtransferase activity, role in tRNA wobble position uridine thiolation and mitochondrion localization	0.849609	5.40347	0.00395127	0.0151594	false	0.803889	5.44756	0.00631116	0.0180846	false	0.179191	5.13986	0.553627	> 0.05	false	0.862021	4.29357	0.00449195	0.0308469	false
orf19.1357	FCY21	High affinity, high capacity, hypoxanthine-adenine-guanine-cytosine/H+ symporter; similar to S. cerevisiae Fcy2; mutation confers resistance to 5-fluorocytosine (5-FC); flow model biofilm induced	-1.33111	7.12775	5.75312e-05	0.000407238	false	-0.684509	7.41529	0.0453608	> 0.05	false	-0.0911166	7.73148	0.806791	> 0.05	false	-0.827761	8.28179	0.021267	> 0.05	false
orf19.1358	GCN4	bZIP transcription factor; amino acid control response; required for Efg1-dependent pseudohyphal induction by amino acid starvation, not by serum; human whole blood and PMN induced; required for biofilm formation; Spider biofilm induced	0.606455	9.22257	0.0983426	> 0.05	false	0.787259	9.40705	0.0308892	> 0.05	false	0.733054	9.43146	0.0464908	> 0.05	false	0.605753	9.27429	0.028705	> 0.05	false
orf19.1359		Ortholog(s) have protein complex binding activity, role in ER-associated protein catabolic process, sporulation resulting in formation of a cellular spore and cytoplasm, extrinsic to membrane, nucleus localization	0.0443314	6.14704	0.90311	> 0.05	false	0.111647	6.25395	0.739476	> 0.05	false	-0.312763	6.10669	0.342834	> 0.05	false	0.175946	6.16808	0.513161	> 0.05	false
orf19.136		Predicted membrane transporter, member of the drug:proton antiporter (12 spanner) (DHA1) family, major facilitator superfamily (MFS); Hap43p-repressed gene	1.05731	4.3691	0.00222175	0.00932911	false	1.68688	4.89684	2.24757e-07	2.21878e-06	false	1.83328	5.06565	1.46489e-08	1.09138e-07	false	0.157332	3.50269	0.606599	> 0.05	false
orf19.1360		Ortholog(s) have role in mitochondrial genome maintenance and mitochondrion localization	1.15036	2.62206	0.0183007	> 0.05	false	1.20589	2.73652	0.0134165	0.034237	false	1.92971	3.32735	6.88709e-06	3.16275e-05	false	-0.805191	3.67229	0.0160698	3.16275e-05	false
orf19.1360.1		Putative adhesin-like protein	-0.349828	5.54691	0.21671	> 0.05	false	-0.452453	5.57368	0.111961	> 0.05	false	-0.989011	5.42803	0.000499322	0.00156829	false	0.0455691	5.40577	0.861482	0.00156829	false
orf19.1361	TIM23	Protein involved in mitochondrial matrix protein import	-0.851153	5.76058	0.00525724	0.0194105	false	-0.57427	5.93759	0.0405712	> 0.05	false	0.168056	6.34346	0.555998	> 0.05	false	-0.624953	7.52585	0.0220346	> 0.05	false
orf19.1362	SMM1	Putative dihydrouridine synthase; Hap43-induced gene; rat catheter biofilm induced; Spider biofilm induced	2.75878	2.51403	1.62571e-08	3.22627e-07	false	3.46234	3.2038	2.99898e-13	1.05248e-11	false	4.60766	4.29838	4.80249e-28	4.70927e-26	true	-1.08855	5.41837	0.00111794	0.0100599	false
orf19.1363		Putative protein of unknown function; Plc1-regulated; transcript induced by Mnl1 under weak acid stress; flow model, rat catheter, Spider biofilm induced	6.38313	1.82523	4.49771e-14	2.49922e-12	false	8.02237	3.42727	5.01551e-27	9.28984e-25	false	10.0178	5.42922	3.86671e-61	1.28916e-57	true	-0.387827	2.35796	0.508161	> 0.05	false
orf19.1364		Ortholog of S. pombe Stm1 G-protein coupled receptor; PQ-loop domains; constitutive expression independent of MTL or white-opaque status; Hap43-repressed	0.0186793	6.55452	0.951635	> 0.05	false	0.101138	6.66911	0.723309	> 0.05	false	-0.560607	6.42179	0.0475562	> 0.05	false	-0.14883	5.88156	0.559694	> 0.05	false
orf19.1365		Putative monooxygenase; mutation confers hypersensitivity to toxic ergosterol analog; constitutive expression independent of MTL or white-opaque status	1.23111	5.02267	0.000416692	0.00222148	false	1.40703	5.22392	1.0262e-05	6.49215e-05	false	1.56099	5.39399	1.03724e-06	5.61847e-06	false	0.450418	2.955	0.168292	5.61847e-06	false
orf19.1366		Has domain(s) with predicted oxidoreductase activity, acting on paired donors, with incorporation or reduction of molecular oxygen, 2-oxoglutarate as one donor, and incorporation of one atom each of oxygen into both donors activity	4.62278	2.38206	1.93102e-12	7.97768e-11	false	4.51078	2.37236	5.44016e-13	1.82286e-11	false	5.54167	3.37398	1.78722e-24	1.17992e-22	false	2.16769	1.9896	1.90087e-05	0.000347888	false
orf19.1367	MTW1	Kinetochore component; amount of Nuf2p and Mtw1p protein detected at each centromere is consistent with a single kinetochore microtubule attachment site	0.182288	3.61478	0.613707	> 0.05	false	0.115994	3.65056	0.758937	> 0.05	false	2.07944	5.02032	0.00107191	0.00308481	true	0.215252	3.81407	0.491435	0.00308481	false
orf19.1367.1		Ortholog of C. parapsilosis CDC317 : CPAR2_407330, Candida tenuis NRRL Y-1498 : CANTEDRAFT_114646, Debaryomyces hansenii CBS767 : DEHA2B05654g and Pichia stipitis Pignal : PICST_44644	0.136719	6.51845	0.627614	> 0.05	false	0.0158137	6.5286	0.958717	> 0.05	false	-0.0426463	6.55806	0.880728	> 0.05	false	-0.130973	6.63477	0.628828	> 0.05	false
orf19.1368		Protein of unknown function; flow model biofilm induced; Spider biofilm induced	-1.41467	6.39124	0.000106278	0.000681408	false	-1.92345	6.33964	7.67147e-08	8.64077e-07	false	-1.80704	6.42466	6.23684e-07	3.53332e-06	false	0.678696	5.11006	0.0177451	3.53332e-06	false
orf19.1369		Protein with predicted peptidase domains; Hap43-repressed gene	1.05782	5.58951	0.000188451	0.001128	false	0.927029	5.57602	0.00137871	0.00484286	false	0.524133	5.3829	0.0670208	> 0.05	false	0.96341	4.20688	0.00330112	0.0241358	false
orf19.137		Putative transferase involved in phospholipid biosynthesis; induced by alpha pheromone in SpiderM medium	-0.495665	5.18679	0.0966975	> 0.05	false	-0.0571717	5.4576	0.866453	> 0.05	false	-0.215343	5.44117	0.488878	> 0.05	false	0.408005	3.92379	0.187553	> 0.05	false
orf19.1370		Protein of unknown function; expression regulated by white-opaque switch; repressed by alpha pheromone in SpiderM medium	2.30247	-0.0117535	0.00282149	0.0114578	false	2.36423	0.098336	0.00470842	0.0140097	false	4.10535	1.51384	2.84884e-09	2.40762e-08	false	4.09686	-2.043	0.139003	> 0.05	false
orf19.1371		Ortholog of C. parapsilosis CDC317 : CPAR2_806590, Candida tenuis NRRL Y-1498 : CANTEDRAFT_92769, Debaryomyces hansenii CBS767 : DEHA2B13376g and Candida dubliniensis CD36 : CD36_23880	-0.337666	4.90017	0.278368	> 0.05	false	-0.206342	5.03142	0.493088	> 0.05	false	-0.174786	5.10546	0.555433	> 0.05	false	0.280048	5.15515	0.266025	> 0.05	false
orf19.1372		Protein of unknown function; transcript regulated by Mig1 and Tup1	0.0212303	6.88695	0.940503	> 0.05	false	-0.273829	6.8178	0.319642	> 0.05	false	-0.683416	6.70478	0.0170032	0.0351557	false	0.270752	7.24753	0.328814	0.0351557	false
orf19.1373	INP51	Putative phosphatidylinositol-4,5-bisphosphate phosphatase; involved in maintenance of phosphoinositide levels; affects hyphal growth, virulence, cell integrity; interacts with Irs4p	0.664663	5.5143	0.0209304	> 0.05	false	1.00494	5.80552	0.000479503	0.00193777	false	0.568847	5.58741	0.050021	> 0.05	false	0.700902	5.24278	0.00600039	0.0382348	false
orf19.1374		Ortholog of Candida tenuis NRRL Y-1498 : CANTEDRAFT_104074, Debaryomyces hansenii CBS767 : DEHA2B13310g, Candida dubliniensis CD36 : CD36_23840 and Pichia stipitis Pignal : PICST_58235	0.164898	4.75763	0.591215	> 0.05	false	0.12412	4.80811	0.683172	> 0.05	false	0.0646592	4.83589	0.830552	> 0.05	false	0.0817629	4.80583	0.755193	> 0.05	false
orf19.1375	LEU42	Putative alpha-isopropylmalate synthase; fungal-specific; induced by human blood or polymorphonuclear cells; regulated by Gcn2 and Gcn4; stationary phase enriched protein; Spider biofilm induced	2.29452	9.90854	1.15852e-09	2.8547e-08	true	0.629541	8.76807	0.0664382	> 0.05	false	-0.14483	8.40681	0.674559	> 0.05	false	0.211114	7.78721	0.50865	> 0.05	false
orf19.1376		Ortholog(s) have SNAP receptor activity, phosphatidic acid binding activity, role in ascospore-type prospore membrane assembly and Golgi apparatus, endoplasmic reticulum, plasma membrane, prospore membrane localization	0.0292483	7.40085	0.923549	> 0.05	false	0.0681055	7.49312	0.820735	> 0.05	false	-0.0460538	7.49433	0.875931	> 0.05	false	-0.155833	7.46207	0.568098	> 0.05	false
orf19.1377	IPK2	Putative inositol polyphosphate multikinase; moderately induced at 42 deg	1.16199	6.55148	0.00050619	0.00264106	false	1.10333	6.58424	0.000781686	0.00297675	false	0.80296	6.44412	0.0124537	0.0267875	false	0.0772964	4.81428	0.78303	0.0267875	false
orf19.1378	SUP35	Translation factor eRF3; shows prion-like aggregation in some, not all, studies; partially complements S. cerevisiae sup35 mutant translation defect; species barrier with S. cerevisiae Sup35p prion; gene not regulated by yeast-hyphal switch	-0.649642	8.42722	0.0425715	> 0.05	false	-0.867024	8.41871	0.00651223	0.018573	false	-0.875198	8.47451	0.00791663	0.0180226	false	-0.570483	8.93524	0.0442832	0.0180226	false
orf19.138	FIG1	S. cerevisiae Fig1 ortholog; an integral membrane protein required for mating; role in thigmotropism; transcript is opaque-specific and a-specific; activated by Cph1 or alpha pheromone	2.75965	1.37333	1.07523e-05	9.43375e-05	false	2.48794	1.2522	0.000138573	0.000644353	false	3.32326	1.9739	3.89553e-09	3.20289e-08	false	0.0754364	0.0427626	1	> 0.05	false
orf19.1381		Ortholog of S. cerevisiae/S. pombe Lsb5; predicted role in actin cortical patch localization, actin filament organization, endocytosis; flow model biofilm induced; Spider biofilm repressed	-0.519021	8.62989	0.150857	> 0.05	false	-0.95294	8.53929	0.00680701	0.0192817	false	-2.1505	8.28982	4.80531e-09	3.89329e-08	true	1.53572	5.87243	3.68133e-05	0.000609074	false
orf19.1382	YEA4	Putative uridine diphosphate-N-acetylglucosamine (UDP-GlcNAc) transporter; required for cell wall chitin synthesis; induced by alpha pheromone in SpiderM medium	0.260972	3.58433	0.483527	> 0.05	false	0.649235	3.88236	0.0711124	> 0.05	false	0.786413	4.02588	0.0164338	0.0341266	false	-0.041712	4.31466	0.889838	0.0341266	false
orf19.1383		Protein of unknown function; induced by alpha pheromone in SpiderM medium	0.444857	5.20091	0.12327	> 0.05	false	0.794475	5.48598	0.005208	0.0153117	false	0.526431	5.37959	0.064206	> 0.05	false	0.37624	5.59541	0.150318	> 0.05	false
orf19.1386		Ortholog(s) have SNAP receptor activity and role in ER to Golgi vesicle-mediated transport, retrograde vesicle-mediated transport, Golgi to ER, vesicle fusion	0.537127	4.91081	0.0748841	> 0.05	false	0.342936	4.87143	0.267377	> 0.05	false	0.65337	5.11175	0.0269188	> 0.05	false	-0.187351	4.50605	0.504535	> 0.05	false
orf19.1387		Ortholog(s) have 4 iron, 4 sulfur cluster binding activity, role in iron-sulfur cluster assembly, tRNA wobble uridine modification and cytoplasm localization	-1.04317	6.79685	0.00036503	0.00197888	false	-1.38903	6.7636	7.6288e-07	6.55526e-06	false	-1.73402	6.73469	5.28134e-09	4.22761e-08	false	0.126944	5.79245	0.620255	> 0.05	false
orf19.1388		Putative 66S pre-ribosomal particle component; Hap43-induced; F-12/CO2 early biofilm induced	1.87283	4.16207	1.14726e-06	1.34919e-05	false	2.0015	4.33919	1.26891e-07	1.35377e-06	true	3.35374	5.54127	2.06659e-20	8.72154e-19	true	-1.47978	6.54426	1.23721e-05	0.000249237	false
orf19.1389		Ortholog(s) have poly(A) RNA binding activity, role in mRNA metabolic process and cytoplasm localization	-0.0900076	8.35583	0.781079	> 0.05	false	-0.324003	8.3196	0.306178	> 0.05	false	-0.298363	8.38966	0.375898	> 0.05	false	-0.000925785	8.57957	0.998124	> 0.05	false
orf19.139	TRA1	Subunit of the NuA4 histone acetyltransferase complex	-0.701578	7.26584	0.0155754	0.0476835	false	-0.833213	7.28901	0.00276296	0.00886167	false	-0.164582	7.62595	0.592688	> 0.05	false	-0.10908	7.90325	0.69507	> 0.05	false
orf19.1390	PMI1	Phosphomannose isomerase; cell wall biosynthesis enzyme; drug target; functional homolog of S. cerevisiae, E. coli phosphomannose isomerase; Gcn4-regulated; induced on adherence to polystyrene, phagocytosis; 3-AT, Spider biofilm repressed	0.14453	7.67326	0.655112	> 0.05	false	-0.326138	7.51736	0.256698	> 0.05	false	-0.374075	7.55496	0.217372	> 0.05	false	0.384229	8.98339	0.157282	> 0.05	false
orf19.1391		Protein with similarity to trimeric LpxA-like enzymes; Hap43-repressed gene	0.184624	2.53383	0.739014	> 0.05	false	-0.0913587	2.45866	0.823261	> 0.05	false	-0.754873	2.22816	0.0788538	> 0.05	false	0.757058	3.25999	0.0220604	> 0.05	false
orf19.1392		Ortholog(s) have chaperone binding, protein disulfide isomerase activity, unfolded protein binding activity, role in ER-associated protein catabolic process, protein retention in ER lumen and endoplasmic reticulum membrane localization	-0.370518	6.78481	0.187718	> 0.05	false	-0.281857	6.89642	0.299727	> 0.05	false	-0.524	6.85064	0.067556	> 0.05	false	0.303404	6.42788	0.259957	> 0.05	false
orf19.1393		Ortholog(s) have NAD transporter activity, pyruvate secondary active transmembrane transporter activity, role in NAD transmembrane transport, mitochondrial pyruvate transport and endoplasmic reticulum, mitochondrion localization	0.166662	4.92457	0.583409	> 0.05	false	0.369057	5.10797	0.203819	> 0.05	false	0.348684	5.15469	0.228832	> 0.05	false	0.00968503	5.39826	0.974135	> 0.05	false
orf19.1394		Putative protein of unknown function; mutant is viable; protein level decreases in stationary phase cultures; Spider biofilm induced	0.559544	6.10224	0.0502409	> 0.05	false	0.173556	5.9571	0.53763	> 0.05	false	0.0360578	5.94424	0.899541	> 0.05	false	0.171035	6.18536	0.520973	> 0.05	false
orf19.1395		Ortholog(s) have inorganic phosphate transmembrane transporter activity, role in phosphate ion transport, transmembrane transport and mitochondrion localization	-2.92456	7.89175	3.32528e-14	1.87907e-12	true	-3.45299	7.91092	2.09392e-20	2.05327e-18	true	-3.90899	7.93696	3.44893e-22	1.88504e-20	true	1.00409	5.29695	0.000653455	0.00650334	false
orf19.1396		Ortholog(s) have ARF GTPase activator activity, role in ER to Golgi vesicle-mediated transport, intra-Golgi vesicle-mediated transport and Golgi apparatus, clathrin-coated vesicle localization	-0.147552	6.35535	0.606934	> 0.05	false	-0.0463307	6.47661	0.868453	> 0.05	false	-0.298095	6.4164	0.305606	> 0.05	false	0.0712691	6.55553	0.793881	> 0.05	false
orf19.1397		Has domain(s) with predicted heme binding activity	1.08566	4.47151	0.00107239	0.00507503	false	1.55757	4.88291	5.16053e-07	4.63753e-06	false	1.19233	4.67659	0.000203164	0.00069974	false	0.419525	4.77174	0.110617	0.00069974	false
orf19.1400		Ortholog of C. parapsilosis CDC317 : CPAR2_406130, Candida tenuis NRRL Y-1498 : CANTEDRAFT_116273, Debaryomyces hansenii CBS767 : DEHA2B11176g and Candida dubliniensis CD36 : CD36_23640	-0.141168	6.61365	0.618223	> 0.05	false	-0.308259	6.60842	0.269446	> 0.05	false	-0.662001	6.51908	0.0202474	0.0408255	false	0.0317766	6.15273	0.905901	0.0408255	false
orf19.1401	EAP1	GPI-anchored cell wall adhesin; Efg1-regulated; mutant suppresses cell adhesion, filamentation, invasive growth defects of S. cerevisiae flo8 or flo11 mutant; biofilm induced; required for biofilm formation; Bcr1-repressed in a/a biofilms	-0.223905	6.15538	0.449826	> 0.05	false	0.0733943	6.37285	0.794758	> 0.05	false	-0.0242806	6.3821	0.940977	> 0.05	false	-0.0538117	5.75836	0.841239	> 0.05	false
orf19.1402	CCT2	Chaperonin of the cytosolic TCP1 ring complex; protein present in exponential and stationary-phase yeast cells, but higher amounts in stationary phase; GlcNAc-induced protein	-0.536414	7.78779	0.0824414	> 0.05	false	-0.660847	7.81047	0.029254	> 0.05	false	-0.588675	7.89766	0.0665267	> 0.05	false	-0.181415	8.52555	0.504971	> 0.05	false
orf19.1403		Ortholog(s) have ATP:ADP antiporter activity, calcium ion binding activity, role in ADP transport, ATP transport, mitochondrial transport and mitochondrion localization	0.0517761	6.45276	0.862635	> 0.05	false	0.279384	6.64586	0.339377	> 0.05	false	0.286926	6.70871	0.363679	> 0.05	false	0.0586214	7.15626	0.83	> 0.05	false
orf19.1404		Predicted tRNA dihydrouridine synthase; Spider biofilm induced	0.844747	3.81045	0.0194994	> 0.05	false	1.12774	4.07268	0.00167971	0.00577334	false	2.08917	4.84758	6.57757e-10	5.97538e-09	true	-1.44373	6.2568	5.56973e-06	0.000132823	false
orf19.1405	PHO13	Putative 4-nitrophenylphosphatase; Hap43p-repressed gene; transcription is regulated upon yeast-hyphal switch	-0.799842	5.02813	0.00851233	0.0288123	false	-0.643417	5.15808	0.0336038	> 0.05	false	-0.266321	5.37838	0.375473	> 0.05	false	-0.00261158	4.80985	1	> 0.05	false
orf19.1406		Ortholog(s) have DNA-directed DNA polymerase activity, role in error-free translesion synthesis, error-prone translesion synthesis and mitochondrion, nuclear chromatin, zeta DNA polymerase complex localization	-0.410538	5.39795	0.151548	> 0.05	false	-0.507644	5.4278	0.0850434	> 0.05	false	-0.883306	5.34279	0.00241953	0.00636677	false	0.274212	4.68657	0.294655	0.00636677	false
orf19.1409	VAC7	Ortholog of S. cerevisiae Vac7; integral vacuolar membrane protein involved in vacuole inheritance and morphology; mutants are viable	-0.449009	4.7584	0.142365	> 0.05	false	-0.10233	4.98792	0.723737	> 0.05	false	0.212637	5.20852	0.47761	> 0.05	false	-0.236846	5.41395	0.381244	> 0.05	false
orf19.1409.1		Ribosomal 60S subunit protein L22B; Spider biofilm repressed	-0.318662	8.46036	0.311089	> 0.05	false	-1.54113	8.10852	7.53341e-07	6.48165e-06	false	-0.716343	8.42763	0.0284193	> 0.05	false	-0.864558	9.79447	0.00253937	0.0194502	false
orf19.1409.2		Protein of unknown function; Spider biofilm induced	2.33121	5.55533	1.16007e-13	5.81606e-12	true	2.40328	5.68965	6.30207e-15	2.87823e-13	true	2.88604	6.16122	3.3855e-18	1.0308e-16	true	0.390397	7.4377	0.231515	> 0.05	false
orf19.1409.3		Protein of unknown function; Spider biofilm induced	1.66123	0.921919	0.00820272	0.0279773	false	1.51267	0.886782	0.0226087	> 0.05	false	1.42749	0.872883	0.0336302	> 0.05	false	-0.0804376	-0.502155	1	> 0.05	false
orf19.1411		Putative cytochrome P450; Hap43-repressed gene	1.79696	2.52059	0.000169711	0.00102783	false	2.07351	2.81546	2.42107e-06	1.80983e-05	false	1.61833	2.52113	9.94105e-05	0.000364615	false	-0.182833	1.76582	0.689591	0.000364615	false
orf19.1412		Ortholog of C. parapsilosis CDC317 : CPAR2_302330, Candida tenuis NRRL Y-1498 : CANTEDRAFT_105448, Debaryomyces hansenii CBS767 : DEHA2C10582g and Candida dubliniensis CD36 : CD36_44020	-0.569801	5.57178	0.0595831	> 0.05	false	-0.63699	5.61602	0.0352939	> 0.05	false	-0.935482	5.56441	0.00446011	0.0109098	false	-0.216335	5.40138	0.39559	0.0109098	false
orf19.1413	YFH1	Frataxin; may be required for iron storage or delivery; role in oxidative stress resistance; transcript regulated by Nrg1, repressed if iron absent induced by macrophage interaction; Hap43-repressed gene	-0.461963	5.27845	0.109587	> 0.05	false	-0.0396097	5.54425	0.896375	> 0.05	false	-0.382984	5.44279	0.184193	> 0.05	false	0.308935	5.40301	0.25991	> 0.05	false
orf19.1414		Protein of unknown function; transcript is upregulated in an RHE model of oral candidiasis; Hap43-repressed	-0.0107703	8.0385	0.974117	> 0.05	false	0.14043	8.1884	0.652037	> 0.05	false	-0.0513706	8.1495	0.875231	> 0.05	false	0.126229	8.19963	0.649449	> 0.05	false
orf19.1415	FRE10	Major cell-surface ferric reductase under low-iron conditions; 7 transmembrane regions and a secretion signal predicted; Tup1, Rim101, Ssn6, Hog1, caspofungin repressed; ciclopirox olamine induced; rat catheter biofilm induced	0.0737538	5.53354	0.882042	> 0.05	false	0.0792052	5.60858	0.874631	> 0.05	false	1.04691	6.24733	0.0231783	0.0458069	false	-1.96261	7.41292	3.66544e-09	3.39461e-07	false
orf19.1416	COX11	Cytochrome oxidase assembly protein; transcript regulated by Nrg1; protein repressed during the mating process; Hap43-repressed gene; rat catheter biofilm induced	-0.778409	5.89061	0.0100151	0.0331581	false	-0.232012	6.18993	0.429987	> 0.05	false	-0.0306387	6.34552	0.916447	> 0.05	false	-0.165633	6.3499	0.555365	> 0.05	false
orf19.1417		Ortholog of C. parapsilosis CDC317 : CPAR2_401720, Candida tenuis NRRL Y-1498 : CANTEDRAFT_102588, Debaryomyces hansenii CBS767 : DEHA2G16698g and Candida dubliniensis CD36 : CD36_43970	-0.367966	3.45735	0.324034	> 0.05	false	-0.256281	3.57651	0.497606	> 0.05	false	0.00767607	3.76511	1	> 0.05	false	0.108988	3.79381	0.729789	> 0.05	false
orf19.1418	SEC15	Predicted exocyst subunit; cellular bud tip-associated protein; ortholog of S. cerevisiae SEC15	0.0882828	6.7392	0.764231	> 0.05	false	0.0795109	6.80702	0.779564	> 0.05	false	-0.238007	6.71083	0.409967	> 0.05	false	0.127753	6.75983	0.64062	> 0.05	false
orf19.1420		Ortholog(s) have cytosol, nucleus localization	0.256914	4.30688	0.462816	> 0.05	false	0.058335	4.27318	0.884077	> 0.05	false	-0.0639475	4.26959	0.840658	> 0.05	false	0.536263	4.32192	0.0568166	> 0.05	false
orf19.1421		Ortholog(s) have ureidoglycolate hydrolase activity and cytosol, nucleus localization	0.00849407	3.13777	1	> 0.05	false	-0.20657	3.10067	0.625056	> 0.05	false	0.583516	3.58305	0.132893	> 0.05	false	0.0250032	2.43069	0.973708	> 0.05	false
orf19.1422	FZO1	Putative mitochondrial biogenesis protein; rat catheter and Spider biofilm induced	-0.312575	6.49535	0.31439	> 0.05	false	0.0995544	6.76686	0.752136	> 0.05	false	0.341827	6.95624	0.275467	> 0.05	false	-0.171097	6.84461	0.539758	> 0.05	false
orf19.1424		Predicted membrane transporter, member of the oxalate:formate antiporter (OFA) family, major facilitator superfamily (MFS)	0.440887	5.12555	0.140958	> 0.05	false	0.501111	5.23337	0.0834735	> 0.05	false	0.179618	5.11154	0.534442	> 0.05	false	0.488931	4.19225	0.100993	> 0.05	false
orf19.1426		Ortholog of S. cerevisiae Skg6; localizes to the cell cortex, cell bud neck, cell bud tip, incipient cellular bud site, and is membrane-bound; Spider biofilm induced	-0.357151	5.70455	0.202425	> 0.05	false	0.172537	6.03431	0.541973	> 0.05	false	0.659794	6.37193	0.0212449	0.0425152	false	-0.0623143	7.09951	0.824534	0.0425152	false
orf19.1427		Putative transporter; fungal-specific; Spider biofilm induced	-0.201042	4.17972	0.608254	> 0.05	false	-0.240894	4.23123	0.537301	> 0.05	false	-0.314226	4.25811	0.404112	> 0.05	false	0.306798	4.64635	0.274755	> 0.05	false
orf19.1428	DUO1	Subunit of the Dam1 (DASH) complex, which acts in chromosome segregation by coupling kinetochores to spindle microtubules	-0.809165	3.44135	0.0350171	> 0.05	false	-0.713152	3.54349	0.0626036	> 0.05	false	-0.366583	3.75082	0.295542	> 0.05	false	-0.209327	4.13402	0.48317	> 0.05	false
orf19.1429	SOH1	Subunit of the RNA polymerase II mediator complex; involved in control of cytokinesis, morphogenesis, biofilm formation, virulence; cell-cycle regulated periodic mRNA expression	0.527724	4.19566	0.120498	> 0.05	false	0.658197	4.34758	0.0506412	> 0.05	false	0.764471	4.47163	0.0181561	0.0371479	false	0.628187	4.73216	0.0176278	0.0371479	false
orf19.1430		Ortholog of C. parapsilosis CDC317 : CPAR2_402120, Lodderomyces elongisporus NRLL YB-4239 : LELG_04437, Candida dubliniensis CD36 : CD36_43870 and Candida orthopsilosis Co 90-125 : CORT0E02170	1.91225	1.65663	0.000579816	0.0029763	false	3.21676	2.80082	2.98859e-09	4.96955e-08	false	3.95659	3.52048	5.49708e-16	1.18623e-14	false	0.616055	1.66097	0.153597	> 0.05	false
orf19.1433		Protein of unknown function; Hap43-repressed; colony morphology-related gene regulation by Ssn6; Spider biofilm induced	-0.835804	7.11681	0.00921652	0.0308203	false	-1.07782	7.10621	0.000601787	0.00236739	false	-1.47458	7.04885	5.55913e-06	2.60677e-05	false	0.934361	5.32865	0.00438927	0.0302978	false
orf19.1433.1		Protein of unknown function; ORF added to Assembly 21 based on comparative genome analysis; overlaps orf19.1433.2, which is annotated as a blocked reading frame	3.13596	-0.69912	0.0283725	> 0.05	false	3.02334	-0.706999	0.0344259	> 0.05	false	2.34557	-1.01413	0.211651	> 0.05	false	1.68687	-1.549	0.219193	> 0.05	false
orf19.1434		Ortholog(s) have protein kinase activator activity	0.331488	5.84946	0.445881	> 0.05	false	-0.00475817	5.74524	1	> 0.05	false	0.604811	6.13992	0.122614	> 0.05	false	0.235315	5.13422	0.348057	> 0.05	false
orf19.1435	TEF1	Translation elongation factor 1-alpha; at cell surface; binds human plasminogen; macrophage/pseudohyphal-induced; induced in RHE model of oral candidiasis, in clinical oral candidiasis isolates; possibly essential; Spider biofilm repressed	-1.11908	10.1864	0.000877374	0.00427656	false	-2.05028	10.0244	1.91489e-09	3.38686e-08	true	-2.01993	10.089	9.66378e-09	7.43231e-08	true	-0.614603	10.6752	0.0261492	> 0.05	false
orf19.1438		Protein with homology to NADH dehydrogenase; regulated by Sef1p-, Sfu1p-, and Hap43p	4.61576	1.53169	3.23969e-10	9.03861e-09	false	4.26239	1.31849	2.15009e-07	2.13663e-06	false	5.31254	2.28658	1.46384e-15	2.94674e-14	false	1.25244	-0.0268649	0.0592367	> 0.05	false
orf19.1439	IPK1	Ortholog of S. cerevisiae/S. pombe Ipk1; an inositol pentakisphosphate 2-kinase, a nuclear protein required for synthesis of 1,2,3,4,5,6-hexakisphosphate; Spider biofilm induced	-0.151656	5.65585	0.596634	> 0.05	false	-0.127445	5.73925	0.644916	> 0.05	false	-0.0751713	5.82362	0.792268	> 0.05	false	0.021914	5.71971	0.935756	> 0.05	false
orf19.144	SNU114	Protein similar to S. cerevisiae Snu114p, which is an RNA helicase involved in pre-mRNA splicing; likely to be essential for growth, based on an insertional mutagenesis strategy	0.734672	5.26847	0.0117522	0.0378569	false	1.10888	5.58667	0.000137407	0.000639381	false	1.25907	5.74857	1.12996e-05	4.98225e-05	false	-0.533854	6.25814	0.0740589	4.98225e-05	false
orf19.1440		Ortholog of C. parapsilosis CDC317 : CPAR2_403340, Candida tenuis NRRL Y-1498 : CANTEDRAFT_94387, Debaryomyces hansenii CBS767 : DEHA2G17622g and Candida dubliniensis CD36 : CD36_43090	0.40651	5.63218	0.180267	> 0.05	false	0.443083	5.7259	0.144185	> 0.05	false	0.257466	5.67998	0.408555	> 0.05	false	-0.0702406	5.57134	0.792967	> 0.05	false
orf19.1440.1		0	2.26301	-1.15571	0.332589	> 0.05	false	2.80938	-0.835615	0.069961	> 0.05	false	3.81952	-0.140345	0.00102842	0.00296476	false	0.0256832	-2.04014	1	0.00296476	false
orf19.1440.2		0	-0.230936	4.35929	0.547129	> 0.05	false	-0.772783	4.19818	0.0590438	> 0.05	false	-0.734765	4.27332	0.0568728	> 0.05	false	-0.689701	3.18067	0.0389201	> 0.05	false
orf19.1441		Ortholog of C. parapsilosis CDC317 : CPAR2_213950, Candida tenuis NRRL Y-1498 : CANTEDRAFT_112720, Debaryomyces hansenii CBS767 : DEHA2A01848g and Candida dubliniensis CD36 : CD36_16230	0.236129	5.89105	0.413811	> 0.05	false	0.519819	6.12443	0.0613283	> 0.05	false	0.656511	6.26468	0.0258812	> 0.05	false	-0.867083	6.96959	0.00342956	0.0249473	false
orf19.1442	PLB4.5	Phospholipase B; Hog1-induced; regulated by Ssn6; putative GPI-anchor; repressed during cell wall regeneration; clade-associated gene expression; Hap43-induced; rat catheter and Spider biofilm repressed	-0.785553	5.32999	0.00939419	0.0313359	false	-1.0289	5.31441	0.000740441	0.00284077	false	-0.0681726	5.76901	0.808828	> 0.05	false	-0.956588	6.88292	0.00484697	0.0325067	false
orf19.1444		Ortholog(s) have phosphatidylinositol-4,5-bisphosphate binding activity, role in actin cortical patch assembly, actin filament organization, endocytosis and actin cortical patch, mating projection tip localization	-0.0873228	7.67229	0.782014	> 0.05	false	-0.200949	7.69062	0.514708	> 0.05	false	-0.722231	7.5293	0.0201355	0.0406243	false	0.131058	6.87651	0.626326	0.0406243	false
orf19.1445	ESC4	Protein similar to S. cerevisiae Esc4; a protein that represses transposition; transposon mutation affects filamentation; rat catheter biofilm repressed	0.60318	3.44474	0.114853	> 0.05	false	0.422599	3.41089	0.305026	> 0.05	false	1.44935	4.13994	1.14158e-05	5.02114e-05	false	0.120078	5.01433	0.669555	5.02114e-05	false
orf19.1446	CLB2	B-type mitotic cyclin (cyclin-dependent protein kinase regulatory subunit); essential; required for wild-type mitotic exit; role in cell polarization; interacts with catalytic subunit Cdk1; Spider biofilm repressed	-0.566666	7.03111	0.0568345	> 0.05	false	-1.17048	6.88785	0.000100639	0.000485221	false	-1.20325	6.93682	8.15376e-05	0.000304249	false	-0.52447	7.78379	0.0662007	0.000304249	false
orf19.1447		Ortholog of C. parapsilosis CDC317 : CPAR2_214050, Candida tenuis NRRL Y-1498 : CANTEDRAFT_92180, Debaryomyces hansenii CBS767 : DEHA2A01738g and Candida dubliniensis CD36 : CD36_16290	-0.837138	3.98965	0.0170389	> 0.05	false	-1.18448	3.93745	0.00114773	0.00413457	false	-0.248975	4.36238	0.424661	> 0.05	false	-0.237766	5.07872	0.376529	> 0.05	false
orf19.1448	APT1	Adenine phosphoribosyltransferase; flucytosine induced; repressed by nitric oxide; protein level decreased in stationary phase yeast cultures	-1.6797	7.42914	0.000133282	0.000832136	false	-2.19274	7.39418	4.70087e-07	4.26468e-06	true	-2.06862	7.47641	5.48662e-06	2.57639e-05	true	-0.88421	6.93175	0.00149306	0.0127311	false
orf19.1448.1v1		0	0	-2.15937	1	> 0.05	false	-5.12548e-15	-2.2195	1	> 0.05	false	0	-2.09868	1	> 0.05	false	0	-2.62874	1	> 0.05	false
orf19.1448.1v2		0	-0.0244774	1.60493	1	> 0.05	false	-0.585216	1.41551	0.319633	> 0.05	false	-0.651519	1.46309	0.234775	> 0.05	false	-0.0832935	1.79896	0.894449	> 0.05	false
orf19.1449		Protein of unknown function; induced in azole-resistant strain that overexpresses MDR1; protein present in exponential and stationary growth phase yeast cultures; Spider biofilm induced	0.306986	3.0317	0.46464	> 0.05	false	0.255913	3.06763	0.632502	> 0.05	false	1.1142	3.65732	0.00616374	0.0144362	false	0.147809	1.64375	0.724021	0.0144362	false
orf19.145	RPB4	Protein similar to S. cerevisiae Rpb4p, which is a component of RNA polymerase II; transposon mutation affects filamentous growth	-0.248486	5.71112	0.384822	> 0.05	false	-0.0220691	5.89152	0.941305	> 0.05	false	-0.0100126	5.95643	0.978664	> 0.05	false	-0.226494	6.33298	0.402706	> 0.05	false
orf19.1450		Ortholog of Candida dubliniensis CD36 : CD36_16320, Candida tropicalis MYA-3404 : CTRG_01238 and Candida albicans WO-1 : CAWG_03918	5.01697	1.41725	3.70278e-09	8.45553e-08	false	4.85345	1.35934	3.20943e-09	5.25811e-08	false	5.66813	2.12359	1.49595e-15	2.99548e-14	false	2.16693	-0.456927	0.00477139	0.0321046	false
orf19.1451	SRB9	Subunit of the RNA polymerase II mediator complex; transposon mutation affects filamentous growth; suppresses S. cerevisiae diploid filamentous (flo8, ste7, ste12, tec1) or haploid invasive (flo8) mutant growth defects	-0.142846	6.85132	0.616802	> 0.05	false	-0.0775782	6.95503	0.774493	> 0.05	false	-0.219786	6.94616	0.441953	> 0.05	false	0.124481	6.48549	0.65005	> 0.05	false
orf19.1453	SPT5	Protein similar to S. cerevisiae Spt5p transcription elongation factor; transposon mutation affects filamentous growth	-0.535555	8.35731	0.0895535	> 0.05	false	-0.619623	8.39593	0.0477885	> 0.05	false	-0.899021	8.35062	0.00586008	0.013827	false	-0.303017	8.12472	0.267171	0.013827	false
orf19.1456		Ortholog of Candida albicans WO-1 : CAWG_03922	3.58394	-1.70115	0.266849	> 0.05	false	3.48986	-1.76479	0.51306	> 0.05	false	4.23361	-1.39859	0.138244	> 0.05	false	1.70965	-1.53842	0.213095	> 0.05	false
orf19.1457		Putative RNA polymerase transcription factor TFIIH core component; possibly an essential gene, disruptants not obtained by UAU1 method	-0.118154	5.58919	0.675443	> 0.05	false	-0.25354	5.59713	0.367768	> 0.05	false	-0.388427	5.59567	0.187254	> 0.05	false	-0.227941	5.58909	0.3809	> 0.05	false
orf19.1458		Ortholog(s) have tRNA-specific adenosine deaminase activity, role in tRNA modification and cytoplasm, nucleus localization	0.440754	3.82392	0.232417	> 0.05	false	0.561216	3.96678	0.142779	> 0.05	false	0.581319	4.03869	0.0886795	> 0.05	false	-0.0710449	4.76099	0.790294	> 0.05	false
orf19.1459	PPE1	Protein similar to S. cerevisiae Ppe1p; shows genetic interaction with some genes involved in diploid filamentous growth and haploid invasive growth in S. cerevisiae	-0.151052	4.79185	0.647083	> 0.05	false	-0.0528594	4.91104	0.880271	> 0.05	false	-0.130364	4.93242	0.691212	> 0.05	false	-0.263419	4.30208	0.372867	> 0.05	false
orf19.1460		Putative glutamine-dependent NAD synthetase, involved in NAD salvage pathway	-0.581179	7.86459	0.0615771	> 0.05	false	-0.599716	7.9295	0.0492615	> 0.05	false	-0.686918	7.95412	0.0301293	> 0.05	false	-0.167229	7.24587	0.534869	> 0.05	false
orf19.1461		S. pombe ortholog SPCC576.01c is a predicted sulfonate dioxygenase; possibly transcriptionally regulated upon hyphal formation; Spider biofilm induced	-0.220009	5.36049	0.478063	> 0.05	false	0.43651	5.77471	0.137658	> 0.05	false	2.61874	7.43427	1.07877e-08	8.2021e-08	true	0.106807	3.53196	0.736211	> 0.05	false
orf19.1462	SMP2	Putative Mg2+-dependent phosphatidate phosphatase; transcript regulated by Nrg1	-0.752292	7.82444	0.0302853	> 0.05	false	-0.907843	7.84046	0.00785053	0.0217751	false	-1.19385	7.80576	0.000793739	0.002357	false	-0.472279	6.51593	0.093944	0.002357	false
orf19.1464	BMT5	Putative beta-mannosyltransferase involved in beta-1,2-mannosylation of phospholipomannan; 9-member family includes Bmt1, Bmt2, Bmt3, and Bmtp with roles in mannosylation of cell wall phosphopeptidomannan; Spider biofilm induced	1.28397	7.06728	5.089e-06	4.8755e-05	false	1.69723	7.44471	4.82076e-09	7.52807e-08	false	1.24916	7.174	1.14311e-05	5.02457e-05	false	0.107259	6.10938	0.674634	5.02457e-05	false
orf19.1465		Has domain(s) with predicted N-acetyltransferase activity and role in metabolic process	-0.409834	3.26342	0.359627	> 0.05	false	-0.0572154	3.49453	0.930263	> 0.05	false	-0.108369	3.53132	0.84083	> 0.05	false	-0.0867633	3.17679	0.784161	> 0.05	false
orf19.1466	REX2	Putative 3'-5' RNA exonuclease with a predicted role in 3'-end processing of U4 and U5 snRNAs, 5S and 5.8S rRNAs; rat catheter biofilm induced	-0.151835	4.56035	0.636491	> 0.05	false	0.0534432	4.73353	0.862895	> 0.05	false	0.547624	5.06652	0.0567053	> 0.05	false	-1.40138	5.36415	3.10365e-07	1.5217e-05	false
orf19.1467	COX13	Cytochrome c oxidase; flucytosine induced; repressed by nitric oxide	-0.577377	9.40918	0.0797229	> 0.05	false	-0.337262	9.58296	0.318063	> 0.05	false	-0.651141	9.51113	0.0551961	> 0.05	false	-0.0940591	9.12843	0.730982	> 0.05	false
orf19.1468	CDC55	Ortholog(s) have protein phosphatase type 2A regulator activity	0.0376399	7.90441	0.906854	> 0.05	false	0.0108318	7.96338	0.974147	> 0.05	false	-0.465621	7.80207	0.149526	> 0.05	false	0.0595855	7.70325	0.827534	> 0.05	false
orf19.147	YAK1	Predicted serine-threonine protein kinase; involved in hyphal growth regulation and biofilm formation; flow model biofilm induced; induced in core caspofungin response	0.092972	6.93686	0.739588	> 0.05	false	0.124871	7.0259	0.646444	> 0.05	false	-0.407966	6.83052	0.153432	> 0.05	false	0.526796	5.93285	0.0370565	> 0.05	false
orf19.1470	RPS26A	Ribosomal protein; regulated by Nrg1, Tup1; repressed upon phagocytosis by murine macrophage; alternatively spliced intron in 5'-UTR; Spider biofilm repressed	-0.401009	9.73256	0.21982	> 0.05	false	-1.96054	9.32109	5.93002e-09	9.15309e-08	false	-1.31376	9.53783	0.000135332	0.000483856	false	-0.752073	10.395	0.00814684	0.0480947	false
orf19.1471	COX4	Putative cytochrome c oxidase subunit IV; Mig1-regulated; macrophage/pseudohyphal-induced gene; macrophage-induced protein; repressed by nitric oxide; 5'-UTR intron; Hap43-repressed	-0.355684	9.1536	0.273527	> 0.05	false	-0.095238	9.34629	0.772492	> 0.05	false	-0.386542	9.27126	0.244406	> 0.05	false	-0.157329	9.20967	0.55944	> 0.05	false
orf19.1473		2-hydroxyacid dehydrogenase domain-containing protein; Hap43-repressed gene; induced by alpha pheromone in SpiderM medium	2.25216	2.38682	8.17067e-06	7.42262e-05	false	2.96853	3.07216	1.41052e-07	1.47188e-06	false	3.98259	4.00263	1.17733e-17	3.26194e-16	true	-1.20265	2.85799	0.0292622	> 0.05	false
orf19.1474	SLA1	Protein required for assembly of the cortical actin cytoskeleton; contains three SH3 domains; transcription is regulated by Nrg1 and Mig1; flow model biofilm repressed	-0.533136	8.6815	0.0939909	> 0.05	false	-0.526145	8.75683	0.0942827	> 0.05	false	-0.878314	8.68119	0.00688779	0.0159527	false	0.149979	7.86578	0.583506	0.0159527	false
orf19.1476		Ortholog(s) have mRNA (N6-adenosine)-methyltransferase activity and role in mRNA methylation, meiosis	2.92798	1.45963	4.17556e-05	0.000313897	false	3.30334	1.87884	8.42921e-06	5.42005e-05	false	3.67015	2.20389	4.12409e-08	2.83208e-07	false	1.5153	0.131266	0.0132447	> 0.05	false
orf19.1477		Protein of unknown function; possible ER protein; Hap43p-repressed; Spider biofilm induced	0.351084	5.53799	0.213809	> 0.05	false	0.237869	5.54789	0.402058	> 0.05	false	-0.201701	5.38435	0.486249	> 0.05	false	1.02257	5.28583	0.00270574	0.0204324	false
orf19.1478	STT3	Putative oligosaccharyltransferase complex component; flow model and rat catheter biofilm repressed	0.0352645	8.45577	0.911819	> 0.05	false	-0.0713905	8.47528	0.818927	> 0.05	false	-0.292727	8.43007	0.359758	> 0.05	false	0.246312	8.86715	0.366354	> 0.05	false
orf19.1479		Ortholog of the mitochondria localized S. cerevisiae Pib2 protein of unknown function; has a FYVE zinc finger domain; Spider biofilm induced	-0.203188	5.70053	0.504003	> 0.05	false	0.0685987	5.90574	0.812709	> 0.05	false	-0.00288717	5.92806	1	> 0.05	false	0.130093	5.74064	0.635803	> 0.05	false
orf19.1480		Putative succinate dehydrogenase; enzyme of citric acid cycle; repressed by nitric oxide; Efg1, Hap43 repressed	-0.249989	7.96778	0.422614	> 0.05	false	0.102091	8.21198	0.741211	> 0.05	false	-0.0534714	8.19204	0.868706	> 0.05	false	0.174264	7.8251	0.537248	> 0.05	false
orf19.1481	HAP42	Predicted transcription factor; possibly an essential gene, disruptants not obtained by UAU1 method	1.20711	5.84	3.70086e-05	0.000283648	false	1.5189	6.13766	6.80411e-08	7.79934e-07	false	1.94628	6.52279	2.59151e-11	2.89451e-10	false	1.42701	6.07404	6.75857e-07	2.85229e-05	false
orf19.1482	HSK3	Subunit of the Dam1 (DASH) complex, which acts in chromosome segregation by coupling kinetochores to spindle microtubules; expression regulated during planktonic growth	0.0740952	3.94461	0.838722	> 0.05	false	-0.245183	3.85789	0.52761	> 0.05	false	0.0135102	4.04474	0.960394	> 0.05	false	0.514262	3.73926	0.0989584	> 0.05	false
orf19.1483		Ortholog(s) have copper ion binding activity, role in mitochondrial respiratory chain complex IV assembly and extrinsic to mitochondrial inner membrane, mitochondrial intermembrane space localization	-0.197656	4.59592	0.581332	> 0.05	false	0.144005	4.83854	0.630014	> 0.05	false	0.239865	4.94862	0.430036	> 0.05	false	0.189184	5.60235	0.466479	> 0.05	false
orf19.1484		Ortholog of S, cerevisiae Spc24; a component of the conserved kinetochore-associated Ndc80 complex involved in chromosome segregation, spindle checkpoint activity and kinetochore clustering; Hap43-induced gene	0.144237	2.65597	0.744981	> 0.05	false	0.330386	2.82633	0.436745	> 0.05	false	0.444616	2.94991	0.26284	> 0.05	false	-0.162721	3.61976	0.668459	> 0.05	false
orf19.1485		Mitochondrial ribosomal protein of the large subunit; rat catheter biofilm induced	-0.669617	5.09104	0.0321805	> 0.05	false	-0.248594	5.34109	0.39846	> 0.05	false	0.0739087	5.55739	0.803548	> 0.05	false	-0.271056	6.43298	0.307962	> 0.05	false
orf19.1486		Protein with a life-span regulatory factor domain; regulated by Sef1, Sfu1, and Hap43; flow model biofilm induced; Spider biofilm induced	0.770979	6.29121	0.0589712	> 0.05	false	0.221614	6.04098	0.591041	> 0.05	false	0.783239	6.43027	0.0555749	> 0.05	false	-0.872001	5.86336	0.00192862	0.0156068	false
orf19.1488		Ortholog of C. parapsilosis CDC317 : CPAR2_210300, Debaryomyces hansenii CBS767 : DEHA2B04334g, Candida dubliniensis CD36 : CD36_16630 and Pichia stipitis Pignal : psti_CGOB_00055	1.24476	3.18264	0.00167895	0.00735076	false	1.56507	3.48992	5.88104e-05	0.000296518	false	1.47513	3.47721	0.00010764	0.000390715	false	-0.304123	3.64885	0.344216	0.000390715	false
orf19.149		Protein of unknown function; transcript detected on high-resolution tiling arrays	2.79353	-0.366388	0.00542725	0.0199608	false	2.0059	-0.779287	0.0686073	> 0.05	false	3.70497	0.419996	6.16596e-06	2.85716e-05	false	0.379912	-1.03723	0.826883	2.85716e-05	false
orf19.1490	MSB2	Mucin family adhesin-like protein; cell wall damage sensor; required for Cek1 phosphorylation by cell wall stress; Rim101-repressed; activation releases extracellular domain into medium; Spider biofilm induced	-0.0234237	7.17177	0.9359	> 0.05	false	0.0993367	7.3065	0.728791	> 0.05	false	0.674623	7.69143	0.0344588	> 0.05	false	0.0678833	7.44241	0.816063	> 0.05	false
orf19.1490.1		Predicted ORF in retrotransposon Tca16 with similarity to the Gag-Pol region of retrotransposons; added to Assembly 21 based on comparative genome analysis; overlaps orf19.1490.2, which is annotated as blocked reading frame	-1.25936	2.48545	0.013542	0.0425532	false	-2.01494	2.3481	0.000135799	0.000632336	false	-2.37254	2.35417	7.08205e-06	3.24334e-05	false	-1.04233	0.728434	0.0338122	3.24334e-05	false
orf19.1491		Ortholog(s) have RNA binding activity, role in mRNA splicing, via spliceosome and U1 snRNP, U2-type prespliceosome localization	0.0262194	4.56687	0.935969	> 0.05	false	0.0782964	4.66521	0.805294	> 0.05	false	0.381151	4.88848	0.19208	> 0.05	false	-0.390178	5.35022	0.140691	> 0.05	false
orf19.1492	PRP39	Putative component of the U1 snRNP; involved in splicing; Hap43-induced gene; Spider biofilm induced	0.0610794	3.60184	0.869939	> 0.05	false	0.488003	3.90749	0.206354	> 0.05	false	1.0148	4.29768	0.00394287	0.00981009	false	-0.241334	5.12329	0.410766	0.00981009	false
orf19.1493	RAD7	Protein similar to S. cerevisiae Rad7p, which is a subunit of the Nucleotide Excision Repair Factor 4; induced under hydroxyurea treatment	-0.633495	6.09128	0.0277361	> 0.05	false	-0.988383	6.03268	0.000430792	0.00176228	false	-1.20459	6.02251	2.80888e-05	0.000114765	false	0.232961	5.60326	0.376597	0.000114765	false
orf19.1494	RAD23	S. cerevisiae Rad23 ortholog; binds damaged DNA; Spider biofilm repressed	-0.748117	7.71381	0.0163782	0.0495698	false	-0.79193	7.76978	0.00870464	0.0237684	false	-0.699583	7.86317	0.0269177	> 0.05	false	-0.320754	8.17601	0.251924	> 0.05	false
orf19.1495		Ortholog(s) have role in L-methionine salvage from methylthioadenosine and cytosol, nucleus localization	-0.470986	4.68365	0.136685	> 0.05	false	-0.522737	4.73193	0.0921119	> 0.05	false	-0.626557	4.75003	0.0428756	> 0.05	false	-0.0235313	4.77803	0.93968	> 0.05	false
orf19.1496		Putative transcription factor with zinc finger DNA-binding motif; Hap43p-repressed gene	0.0426551	4.17163	0.930496	> 0.05	false	0.370993	4.42182	0.346191	> 0.05	false	0.277485	4.42617	0.449706	> 0.05	false	0.146121	3.08376	0.673182	> 0.05	false
orf19.1497	ZCF6	Putative transcription factor with zinc cluster DNA-binding motif	0.080474	4.56523	0.857954	> 0.05	false	0.272095	4.74103	0.508284	> 0.05	false	0.279046	4.80208	0.478621	> 0.05	false	0.495128	3.33771	0.184084	> 0.05	false
orf19.1499	CTF1	Putative zinc-finger transcription factor, similar to A. nidulans FarA and FarB; activates genes required for fatty acid degradation; induced by oleate; null mutant displays carbon source utilization defects and slightly reduced virulence	1.01849	5.40819	0.00226351	0.00946276	false	1.23464	5.62951	0.000145532	0.000669708	false	0.946739	5.4916	0.00376639	0.00945139	false	-0.374471	5.71687	0.163117	0.00945139	false
orf19.150	TIM17	Predicted component of the Translocase of the Inner Mitochondrial membrane (TIM23 complex), involved in protein import into mitochondria	-0.654068	6.08996	0.0340103	> 0.05	false	-0.537061	6.20844	0.0746987	> 0.05	false	0.18707	6.60845	0.545368	> 0.05	false	-0.25119	6.99968	0.353644	> 0.05	false
orf19.1500		Ortholog of C. parapsilosis CDC317 : CPAR2_210210, Candida tenuis NRRL Y-1498 : CANTEDRAFT_128446, Debaryomyces hansenii CBS767 : DEHA2B04092g and Candida dubliniensis CD36 : CD36_16720	0.350678	5.98417	0.211517	> 0.05	false	0.423773	6.09831	0.123368	> 0.05	false	0.0380591	5.94795	0.896606	> 0.05	false	0.198239	5.87982	0.428705	> 0.05	false
orf19.1502		Has domain(s) with predicted aminoacyl-tRNA hydrolase activity and role in translation	0.490981	5.42437	0.0910947	> 0.05	false	0.523124	5.51611	0.0730403	> 0.05	false	0.0461229	5.31146	0.885377	> 0.05	false	0.512567	5.18519	0.0405269	> 0.05	false
orf19.1504		Putative patatin-like phospholipase; fungal-specific (no human or murine homolog)	-1.04006	6.7315	0.00040649	0.00217709	false	-0.838992	6.87252	0.00299291	0.00946185	false	-0.96941	6.88594	0.000890026	0.00260408	false	-0.0729188	5.80713	0.782555	0.00260408	false
orf19.1505		Ortholog(s) have cytoplasm localization	-0.450631	5.2637	0.150994	> 0.05	false	0.0120744	5.55064	0.970333	> 0.05	false	0.458853	5.85184	0.102117	> 0.05	false	-0.000912574	6.76808	0.998237	> 0.05	false
orf19.1506		Ortholog of Candida albicans WO-1 : CAWG_03962	7.94123	1.03675	4.60711e-10	1.23872e-08	false	8.29995	1.33938	4.23203e-10	8.65407e-09	false	9.43606	2.4699	3.0001e-21	1.44962e-19	false	4.02399	-0.104397	9.253e-07	3.78521e-05	false
orf19.1507	AMN1	Putative negative regulator of exit from mitosis; Plc1-regulated; rat catheter biofilm induced	-0.206122	5.55681	0.507893	> 0.05	false	-0.769893	5.39065	0.00746891	0.0208641	false	-0.926529	5.39362	0.00123586	0.00349923	false	0.0387012	5.68652	0.883882	0.00349923	false
orf19.1508		Protein of unknown function; transcript detected on high-resolution tiling arrays	0	-2.15937	1	> 0.05	false	-5.12548e-15	-2.2195	1	> 0.05	false	0	-2.09868	1	> 0.05	false	0	-2.62874	1	> 0.05	false
orf19.1509	ROD1	Protein similar to S. cerevisiae Rod1;a membrane protein with a role in drug tolerance; repressed by Rgt1; mutant is viable	-0.864621	6.4534	0.00225039	0.00943157	false	-0.887614	6.51679	0.00205414	0.006876	false	-0.692497	6.64757	0.0239927	0.0472066	false	-0.483288	6.6239	0.116828	0.0472066	false
orf19.151	TPO5	Putative polyamine transporter; mutation confers hypersensitivity to toxic ergosterol analog; hyphal induced; macrophage induced	-0.0567999	4.96508	0.861103	> 0.05	false	0.174029	5.1554	0.548797	> 0.05	false	0.0802213	5.16489	0.781659	> 0.05	false	-0.46482	5.58094	0.094931	> 0.05	false
orf19.1510	SRD1	Sur7 family protein with PalI-like domains; not required for stress responses; mutant is viable	1.44295	6.21083	1.25273e-06	1.45273e-05	false	1.17473	6.0936	4.62687e-05	0.000241786	false	0.92605	5.98398	0.00134667	0.0037761	false	0.0877236	5.95979	0.737736	0.0037761	false
orf19.1513	FAB1	Phosphatidylinositol 3-phosphate 5-kinase; required for hyphal growth on solid media, and for wild-type vacuolar morphology and acidification; not required for wild-type virulence in mouse systemic infection or for adherence to HeLa cells	-0.696368	6.96635	0.0128197	0.0407056	false	-0.789991	7.00314	0.00354669	0.0109437	false	-0.72938	7.08478	0.0104097	0.022946	false	0.553616	6.2924	0.0523846	0.022946	false
orf19.1514		Ortholog(s) have enzyme binding, phosphatidylinositol-4-phosphate binding activity and role in endoplasmic reticulum unfolded protein response, protein localization to Golgi apparatus, retrograde vesicle-mediated transport, Golgi to ER	-0.295444	7.54824	0.332693	> 0.05	false	-0.293931	7.62128	0.323377	> 0.05	false	-0.401845	7.6324	0.196401	> 0.05	false	0.269886	7.85529	0.319088	> 0.05	false
orf19.1515	CHT4	Chitinase; similar to S. cerevisiae sporulation-specific Cts2p; functionally complements A. gossypii cts2 mutant sporulation defect; homozygous null mutation causes no obvious defects; transcription decreases upon yeast-to-hyphal switch	0.0721799	5.53536	0.820046	> 0.05	false	-0.125591	5.50871	0.673749	> 0.05	false	-0.636802	5.3433	0.0314624	> 0.05	false	0.326221	4.13843	0.256248	> 0.05	false
orf19.1516		Ortholog(s) have ubiquitin-specific protease activity, role in negative regulation of gluconeogenesis, proteasomal ubiquitin-dependent protein catabolic process, protein deubiquitination and nucleoplasm localization	-1.17548	7.95683	0.000297259	0.00165868	false	-1.34911	7.9777	3.07535e-05	0.000168777	false	-1.74789	7.93447	2.18226e-07	1.31925e-06	false	0.0608965	6.98097	0.822624	> 0.05	false
orf19.1517	ARO3	3-deoxy-D-arabinoheptulosonate-7-phosphate synthase; aromatic amino acid synthesis; GCN-regulated; feedback-inhibited by phe if expressed in S. cerevisiae; decreased in stationary phase; flow model biofilm repressed	0.429267	8.62161	0.192163	> 0.05	false	-0.912685	8.07744	0.00295396	0.0093617	false	-0.553708	8.27136	0.0822285	> 0.05	false	-0.326198	8.90021	0.241356	> 0.05	false
orf19.1519		Protein of unknown function; Hap43-repressed gene	0.380995	6.00457	0.187279	> 0.05	false	0.475708	6.13157	0.0875844	> 0.05	false	0.57622	6.24952	0.0463518	> 0.05	false	0.256738	5.81398	0.3153	> 0.05	false
orf19.1522		Ortholog of C. parapsilosis CDC317 : CPAR2_211990, Debaryomyces hansenii CBS767 : DEHA2G03036g, Candida dubliniensis CD36 : CD36_16850 and Pichia stipitis Pignal : psti_CGOB_00069	-0.329996	6.63589	0.245678	> 0.05	false	-1.22925	6.37386	9.48206e-06	6.03305e-05	false	-1.14111	6.46036	5.77188e-05	0.000221571	false	0.247817	7.27108	0.356181	0.000221571	false
orf19.1523	FMO1	Putative oxidoreductase; mutation confers hypersensitivity to toxic ergosterol analog, and to amphotericin B	1.41215	3.71802	0.00369033	0.0143482	false	1.55095	3.89594	0.00127119	0.00450865	false	1.47328	3.89036	0.00183968	0.00500551	false	0.927408	1.64176	0.0251425	0.00500551	false
orf19.1524	SPR3	Septin; mutant has no obvious phenotype	3.88832	0.467054	2.28957e-05	0.000185503	false	3.72569	0.438594	0.000704017	0.00271981	false	4.92506	1.46225	1.84214e-10	1.80373e-09	false	0.987632	-1.3037	0.435172	> 0.05	false
orf19.1525		Ortholog(s) have role in nuclear-transcribed mRNA catabolic process, nonsense-mediated decay and cytoplasm localization	0.686294	6.38957	0.0156372	0.0478297	false	0.787532	6.52581	0.00483409	0.0143261	false	0.499783	6.40852	0.0765885	> 0.05	false	0.0298192	6.863	0.912891	> 0.05	false
orf19.1526	SNF2	Protein involved in transcriptional regulation; ortholog of S. cerevisiae Snf2p, which is the catalytic subunit of the SWI/SNF chromatin remodeling complex; interacts with Swi1p; SWI/SNF complex is essential for hyphal growth and virulence	-0.118581	7.38251	0.686526	> 0.05	false	-0.0906196	7.46841	0.753208	> 0.05	false	-0.235432	7.4586	0.420432	> 0.05	false	0.0432726	8.04137	0.881093	> 0.05	false
orf19.1527		Protein of unknown function; Spider biofilm induced	0.138825	3.6426	0.74209	> 0.05	false	0.0733362	3.67942	0.87981	> 0.05	false	0.0593474	3.72959	0.905772	> 0.05	false	-0.18303	3.42417	0.567691	> 0.05	false
orf19.1528		Putative mitochondrial RNA polymerase specificity factor; possibly an essential gene, disruptants not obtained by UAU1 method	-0.0608683	4.80959	0.833871	> 0.05	false	0.160764	4.99487	0.598465	> 0.05	false	0.786817	5.41857	0.00876981	0.0197158	false	-0.815283	6.5876	0.00349003	0.0251312	false
orf19.1529		Protein of unknown function; macrophage-induced gene	2.7092	1.30319	3.47557e-05	0.00026823	false	2.5225	1.246	0.000380485	0.00157876	false	3.28292	1.90535	2.0119e-09	1.73101e-08	false	-0.79129	0.817348	0.145632	> 0.05	false
orf19.1530		Ortholog of Candida albicans WO-1 : CAWG_03981	7.3389	0.518614	1.30955e-08	2.70343e-07	false	7.61176	0.740607	1.01413e-07	1.10856e-06	false	8.51903	1.62651	3.34895e-14	5.62488e-13	false	5.21275	0.908001	3.12059e-13	8.32324e-11	false
orf19.1531		Ortholog(s) have RNA binding, protein heterodimerization activity, role in mRNA cleavage, mRNA polyadenylation and mRNA cleavage factor complex, mitochondrion localization	0.520831	6.19509	0.0675034	> 0.05	false	0.72863	6.39409	0.00999686	0.0267922	false	0.382001	6.24598	0.183387	> 0.05	false	-0.0831579	6.55756	0.770146	> 0.05	false
orf19.1532	SAM37	Protein of the mitochondrial outer membrane, component of the Sorting and Assembly Machinery (SAM) involved in insertion of proteins into the outer membrane; mutants show loss of mtDNA	-0.586624	4.83739	0.0474381	> 0.05	false	-0.637558	4.88711	0.029518	> 0.05	false	-0.107826	5.18048	0.710855	> 0.05	false	-0.601616	4.79565	0.0384114	> 0.05	false
orf19.1533		Possible vacuolar protein; Hap43-induced gene	-0.0997713	5.39031	0.744667	> 0.05	false	0.184203	5.60727	0.510149	> 0.05	false	0.604817	5.90523	0.0347932	> 0.05	false	-0.316459	7.19305	0.259804	> 0.05	false
orf19.1534		Ortholog of S. cerevisiae Zrt3, vacuolar membrane zinc transporter; predicted Kex2 substrate; induced in oralpharyngeal candidasis; flow model biofilm induced; Spider biofilm induced	-0.240259	5.81908	0.401884	> 0.05	false	-0.667298	5.70896	0.019204	0.0467765	false	-0.390275	5.88288	0.192545	> 0.05	false	0.672894	6.44152	0.0116271	> 0.05	false
orf19.1535		Protein of unknown function; Hap43-induced gene	-0.197168	4.05015	0.574633	> 0.05	false	-0.295013	4.07452	0.432669	> 0.05	false	-0.0531794	4.25012	0.883388	> 0.05	false	0.364797	4.16684	0.227516	> 0.05	false
orf19.1536		Putative vacuolar transporter; Hap43-induced; required for normal filamentous growth; mRNA binds She3 and is localized to hyphal tips	-0.0691731	6.43565	0.811494	> 0.05	false	0.0814844	6.58368	0.769611	> 0.05	false	0.401981	6.81621	0.162104	> 0.05	false	-0.324043	7.62271	0.240107	> 0.05	false
orf19.1538	TLG2	Putative syntaxin-like t-SNARE; macrophage/pseudohyphal-repressed	0.294941	4.86488	0.318456	> 0.05	false	0.439458	5.01917	0.132391	> 0.05	false	0.420257	5.06629	0.148605	> 0.05	false	0.428649	4.85607	0.0991037	> 0.05	false
orf19.1539		Protein of unknown function; F-12/CO2 early biofilm induced	2.76101	1.04954	6.3599e-05	0.000442671	false	2.67043	1.06915	0.000133321	0.000621667	false	4.50959	2.67164	1.0869e-16	2.61161e-15	false	-0.0932753	0.394838	1	> 0.05	false
orf19.154		Putative ortholog of S. cerevisiae Utp30; a U3-containing 90S preribosome complex protein; Hap43-induced; Spider biofilm induced	-0.0873708	3.26643	0.854412	> 0.05	false	0.320062	3.54872	0.445267	> 0.05	false	1.53631	4.40324	4.87807e-06	2.31016e-05	false	-1.18042	5.28596	0.00267369	0.0202133	false
orf19.1541		Protein with a globin-like domain; repressed by alpha pheromone in SpiderM medium; Spider biofilm induced	4.74423	2.7568	6.10738e-15	3.91577e-13	false	4.90707	2.99343	8.85767e-15	3.88572e-13	false	6.21986	4.27116	3.95631e-25	2.77691e-23	true	1.57419	1.18586	0.0257951	> 0.05	false
orf19.1542	HEX3	Protein similar to S. cerevisiae Hex3p, which is involved in DNA damage response; transposon mutation affects filamentous growth	0.271555	6.0836	0.356176	> 0.05	false	0.817765	6.48101	0.00830437	0.0228439	false	0.690814	6.45935	0.0203052	0.0409048	false	0.162937	5.93211	0.522193	0.0409048	false
orf19.1543	OPI1	Leucine zipper transcription factor; repressor of INO1 involved in inositol biosynthesis; functional homolog of S. cerevisiae Opi1; has putative Opi1-Sin3 interaction domain; interacts with ScSin3, but not CaSin3	-0.013811	5.34532	0.95963	> 0.05	false	0.327045	5.59805	0.255601	> 0.05	false	0.253969	5.61636	0.389638	> 0.05	false	0.409421	5.25224	0.102217	> 0.05	false
orf19.1544		Putative cis-golgi localized protein involved in ER to Golgi transport; Spider biofilm repressed	-0.503276	6.75938	0.0811422	> 0.05	false	-0.494417	6.8351	0.0810402	> 0.05	false	-0.92173	6.7309	0.00163087	0.00448439	false	0.0432751	6.41289	0.87289	0.00448439	false
orf19.1545		Ortholog(s) have structural constituent of ribosome activity and mitochondrial small ribosomal subunit localization	-0.428175	4.71275	0.171086	> 0.05	false	-0.0158262	4.97607	0.963648	> 0.05	false	0.202628	5.14827	0.491383	> 0.05	false	-0.44134	6.15361	0.0862965	> 0.05	false
orf19.1546		Membrane-localized protein of unknown function	-0.29628	5.88147	0.33421	> 0.05	false	-0.130129	6.0309	0.671822	> 0.05	false	0.0218489	6.16469	0.953893	> 0.05	false	-0.0759042	6.16425	0.774603	> 0.05	false
orf19.1547		Ortholog(s) have polynucleotide 3'-phosphatase activity and role in DNA repair	0.726943	3.4648	0.05606	> 0.05	false	0.439184	3.36507	0.258206	> 0.05	false	0.613035	3.52647	0.0720711	> 0.05	false	0.491757	2.9473	0.186315	> 0.05	false
orf19.1548		Ortholog(s) have role in mRNA splicing, via spliceosome and U4/U6 x U5 tri-snRNP complex localization	0.162705	3.44084	0.678013	> 0.05	false	0.159317	3.50991	0.675418	> 0.05	false	0.0188323	3.496	0.981022	> 0.05	false	0.265596	3.41295	0.400498	> 0.05	false
orf19.1549		Plasma membrane-associated protein identified in detergent-resistant membrane fraction (possible lipid raft component); repressed by nitric oxide; predicted transmembrane helix	0.0584994	7.4167	0.85044	> 0.05	false	0.200829	7.56366	0.49716	> 0.05	false	0.185106	7.61387	0.552853	> 0.05	false	-0.254757	7.63504	0.34829	> 0.05	false
orf19.155	URE2	Functional homolog of S. cerevisiae Ure2p, which is a regulator of nitrogen utilization, and which also has an infectious prion form called [URE3]; forms [URE3] prion when expressed in S. cerevisiae	-0.121272	6.28511	0.665921	> 0.05	false	-0.15149	6.34277	0.578404	> 0.05	false	-0.35017	6.31036	0.21814	> 0.05	false	-0.310534	6.62414	0.248122	> 0.05	false
orf19.1551		Predicted protein of unknown function; overlaps CPR3/orf19.1552	5.08618	-1.07617	0.0132521	0.0417405	false	6.73847	0.0263617	3.37565e-06	2.42291e-05	false	5.43647	-0.790808	0.00372402	0.00935987	false	0.391712	-1.7235	1	0.00935987	false
orf19.1552	CPR3	Putative peptidyl-prolyl cis-trans isomerase; macrophage-induced protein; protein levels decrease in stationary phase yeast cultures; predicted mitochondrial localization; overlaps orf19.1551	-0.385732	7.53924	0.204146	> 0.05	false	-0.576877	7.53156	0.0473358	> 0.05	false	-0.94929	7.45182	0.0012453	0.00352	false	0.035132	7.52138	0.897233	0.00352	false
orf19.1553	ENT3	Putative epsin; induced during the mating process; transcript is upregulated in an RHE model of oral candidiasis	-0.120676	8.78356	0.708641	> 0.05	false	-0.271066	8.78594	0.395391	> 0.05	false	-0.570133	8.71652	0.082305	> 0.05	false	-0.133512	8.51691	0.621149	> 0.05	false
orf19.1555	SAC3	Putative nuclear pore-associated protein, required for small ribosomal subunit biogenesis; possibly an essential gene, disruptants not obtained by UAU1 method	0.177594	6.41994	0.536748	> 0.05	false	0.373014	6.59969	0.18826	> 0.05	false	0.248777	6.58928	0.387399	> 0.05	false	-0.163527	6.74468	0.549043	> 0.05	false
orf19.1557		Ortholog(s) have S-adenosylmethionine-dependent methyltransferase activity, role in protein methylation and cytosol, nucleus localization	-0.137421	4.33087	0.684907	> 0.05	false	-0.520767	4.22805	0.128632	> 0.05	false	-0.602262	4.25491	0.0588497	> 0.05	false	-0.827475	3.70132	0.00681268	0.042062	false
orf19.1559	HOM2	Aspartate-semialdehyde dehydrogenase; forms a homodimer; conserved in bacteria, archaea, and fungi but not in mammals; ketoconazole-repressed; protein present in exponential and stationary growth phase yeast cultures; GlcNAc-induced protein	-0.3309	8.86234	0.320378	> 0.05	false	-1.25252	8.59597	0.000134202	0.000625337	false	-1.16527	8.68111	0.000483762	0.00152878	false	-0.428773	8.24625	0.119292	0.00152878	false
orf19.156	FGR51	Protein lacking an ortholog in S. cerevisiae; transposon mutation affects filamentous growth; Hap43p-repressed gene	0.0558761	5.77384	0.849539	> 0.05	false	-0.127613	5.75511	0.671482	> 0.05	false	-0.194729	5.78199	0.522943	> 0.05	false	-0.0654505	5.44905	0.800782	> 0.05	false
orf19.1560	POB3	Protein involved in chromatin assembly and disassembly; ortholog of S. cerevisiae Pob3; transposon mutation affects filamentous growth; rat catheter biofilm repressed	-1.19692	8.15301	0.000194562	0.00115834	false	-1.64114	8.10378	3.20051e-07	3.02281e-06	false	-1.82614	8.11971	2.97743e-08	2.08764e-07	false	-0.00955264	7.7124	0.973151	> 0.05	false
orf19.1562		Protein of unknown function; flow model biofilm induced; Spider biofilm induced; repressed by alpha pheromone in SpiderM medium	0.121977	5.2611	0.669193	> 0.05	false	0.402943	5.48725	0.176172	> 0.05	false	0.822185	5.79941	0.00355379	0.00898964	false	0.502787	3.6265	0.294672	0.00898964	false
orf19.1563	ECM3	Ortholog(s) have role in fungal-type cell wall organization and endoplasmic reticulum localization	-0.509872	5.61011	0.276264	> 0.05	false	-0.441179	5.71025	0.337568	> 0.05	false	-0.0944521	5.92633	0.845819	> 0.05	false	-0.689912	5.34349	0.00600357	0.0382348	false
orf19.1564		Plasma membrane-localized protein of unknown function	-1.58383	8.45933	1.22381e-06	1.43416e-05	false	-1.72859	8.4966	7.30365e-08	8.32491e-07	false	-2.45586	8.41619	4.03733e-13	5.82704e-12	true	0.279596	7.51129	0.302083	> 0.05	false
orf19.1565		Putative transcription factor with zinc finger DNA-binding motif	0.115794	4.77583	0.704646	> 0.05	false	-0.00236257	4.78691	1	> 0.05	false	0.830804	5.32303	0.00415906	0.010279	false	-1.39647	6.56313	1.33642e-05	0.000265215	false
orf19.1566	UTP21	Putative U3 snoRNP protein; Hap43-induce; physically interacts with TAP-tagged Nop1; Spider biofilm induced	1.66246	4.34358	0.00021708	0.0012742	false	1.70676	4.45251	0.000112178	0.000534287	false	3.07462	5.63987	2.18648e-12	2.83097e-11	true	-2.01723	7.77093	7.6283e-06	0.000173602	true
orf19.1567		Ortholog(s) have Rab guanyl-nucleotide exchange factor activity, phosphatidylinositol binding activity	-0.04165	6.29769	0.882915	> 0.05	false	0.0456956	6.41378	0.873487	> 0.05	false	0.284824	6.59924	0.318242	> 0.05	false	0.217125	5.93387	0.406368	> 0.05	false
orf19.1569	UTP22	Putative U3 snoRNP protein; Ssr1-induced; repressed by prostaglandins; heterozygous null mutant is resistant to parnafungin	0.204517	5.7313	0.597247	> 0.05	false	0.47386	5.95503	0.204471	> 0.05	false	1.43833	6.6501	0.000237306	0.000803932	false	-1.68524	8.43127	8.73166e-06	0.000192154	false
orf19.1570	ERG7	2,3-epoxysqualene-lanosterol cyclase (lanosterol synthase), conversion of 2,3-oxidosqualene to lanosterol in sterol biosynthesis; fluconazole-induced; possibly essential, disruptants not obtained by UAU1 method; rat catheter biofilm induced	-0.664784	7.83068	0.0329818	> 0.05	false	-0.696915	7.89059	0.0229423	> 0.05	false	-1.04084	7.82728	0.00116832	0.00333205	false	0.211077	7.11769	0.470918	0.00333205	false
orf19.1571	ATO7	Putative fungal-specific transmembrane protein	7.00847	0.247413	5.86388e-07	7.65173e-06	false	7.14052	0.346804	5.86461e-06	3.92229e-05	false	8.32037	1.45797	5.33748e-13	7.58856e-12	false	4.43337	-1.91932	0.0787057	> 0.05	false
orf19.1573		Ortholog(s) have endoplasmic reticulum, fungal-type vacuole membrane localization	-0.953869	7.32451	0.000999377	0.00478725	false	-0.829175	7.44038	0.00361804	0.0111329	false	-0.85863	7.48872	0.0038356	0.00958614	false	-0.272016	7.27996	0.314394	0.00958614	false
orf19.1574		Putative TFIID subunit involved in RNA polymerase II transcription initiation; possibly an essential gene, disruptants not obtained by UAU1 method	0.0271969	6.07707	0.936479	> 0.05	false	-0.0439572	6.11345	0.875475	> 0.05	false	0.11451	6.25286	0.706148	> 0.05	false	0.302557	5.47011	0.229539	> 0.05	false
orf19.1575	PRS1	Phosphoribosylpyrophosphate synthetase; enzyme of purine, pyrimidine, histidine, and tryptophan biosynthesis; essential; flucytosine induced; macrophage/pseudohyphal-induced	0.635953	5.27217	0.0515544	> 0.05	false	0.681674	5.37279	0.0280815	> 0.05	false	1.35059	5.87798	1.85086e-05	7.80122e-05	false	-1.37971	7.26031	1.61321e-05	0.000306465	false
orf19.1576		Ortholog(s) have nuclear localization sequence binding, ubiquitin binding activity, role in response to ethanol and cytosol localization	-0.528221	5.56462	0.0856188	> 0.05	false	-0.576252	5.61614	0.062643	> 0.05	false	-0.569856	5.67809	0.0681439	> 0.05	false	0.00180727	5.06254	1	> 0.05	false
orf19.1577		Has domain(s) with predicted sequence-specific DNA binding, sequence-specific DNA binding transcription factor activity, zinc ion binding activity and role in regulation of transcription, DNA-dependent	4.0103	1.39275	2.88276e-07	4.15167e-06	false	3.60998	1.14436	1.5605e-06	1.24318e-05	false	4.80808	2.21453	9.34334e-14	1.49046e-12	false	2.17236	0.0964707	0.000642452	0.00644191	false
orf19.1578		Ortholog of S. cereviaie Rrp5, an RNA binding protein involved in synthesis of 18S and 5.8S rRNAs; Hap43-induced gene	1.20816	5.28347	0.00402297	0.0153814	false	1.51137	5.57525	0.000281354	0.00120338	false	2.6861	6.57877	5.79999e-10	5.37144e-09	true	-2.0196	8.54373	1.09601e-06	4.20011e-05	true
orf19.158		Ortholog of S. cerevisiae Apd1; required for normal localization of actin patches and normal tolerance of sodium ions and hydrogen peroxide; Hap43-induced; Spider biofilm induced	1.23821	4.07533	0.00120344	0.00557258	false	1.49045	4.33154	1.83954e-05	0.000107597	false	2.58988	5.26083	4.8532e-17	1.2258e-15	true	-0.800231	6.29861	0.0227177	> 0.05	false
orf19.1580		Protein of unknown function; Spider biofilm induced	1.4708	4.62086	2.81668e-05	0.000223502	false	3.26484	6.17799	2.70535e-17	1.68591e-15	true	3.67761	6.61409	3.59698e-16	8.07565e-15	true	1.22845	3.03289	0.002523	0.0193594	false
orf19.1581		Planktonic growth-induced gene	2.82289	0.124299	0.00169242	0.00740006	false	3.36382	0.62148	7.96754e-05	0.000392665	false	3.53416	0.784983	3.01484e-05	0.000122281	false	4.12079	-2.03652	0.142368	0.000122281	false
orf19.1582		Predicted membrane transporter; member of the drug:proton antiporter (12 spanner) (DHA1) family, major facilitator superfamily (MFS); mRNA binds She3	2.03832	1.56694	0.000321594	0.00177516	false	3.13841	2.54258	2.81204e-09	4.77117e-08	false	2.89037	2.37379	3.46085e-08	2.41391e-07	false	1.89783	0.380677	0.00139124	0.0120949	false
orf19.1584		Predicted MFS membrane transporter; monocarboxylate porter family member; colony morphology-related gene regulation by Ssn6; flow model biofilm induced; Spider biofilm induced	1.15187	5.94971	8.18701e-05	0.000543735	false	0.852617	5.82366	0.00316671	0.00990878	false	0.298803	5.54983	0.317798	> 0.05	false	0.836374	5.83775	0.00227909	0.017795	false
orf19.1585	ZRT2	Zinc transporter; ciclopirox olamine, fluconazole, alkaline repressed; transcript induced by amphotericin B, interaction with macrophages; possibly essential (UAU1 method); induced in oralpharyngeal candidiasis; Spider biofilm induced	-0.945848	9.51124	0.0104537	0.0344171	false	-1.9866	9.30484	3.54998e-08	4.40805e-07	false	-1.88876	9.38384	5.44064e-06	2.55841e-05	false	0.504351	10.5875	0.061706	2.55841e-05	false
orf19.1586	FGR22	Putative phosphatidylinositol-specific phospholipase C (PI-PLC); predicted type 2 membrane protein; no S. cerevisiae ortholog; role in, and regulated by, filamentation, Hap43p; almost identical to orf19.5797	-0.235721	2.41351	0.61068	> 0.05	false	-0.382861	2.41151	0.417965	> 0.05	false	-0.974742	2.23644	0.0223204	0.044405	false	-1.18482	1.40954	0.00712676	0.0434172	false
orf19.1587	HGT20	Putative glucose transporter of the major facilitator superfamily; the C. albicans glucose transporter family comprises 20 members; 12 probable membrane-spanning segments; regulated by Nrg1	-2.79147	6.46559	8.93315e-15	5.56694e-13	true	-3.17446	6.49224	8.40996e-15	3.71375e-13	true	-3.33832	6.53607	1.4994e-17	4.09754e-16	true	-1.4899	3.79415	1.20102e-05	0.000243417	false
orf19.1588		Putative mitochondrial protein of unknown function; regulated by Sef1p-, Sfu1p-, and Hap43p	-0.348825	6.21398	0.220183	> 0.05	false	-0.408231	6.25992	0.141989	> 0.05	false	-0.860351	6.14049	0.00310381	0.00793588	false	0.330676	5.86706	0.208575	0.00793588	false
orf19.1589		Putative transcription factor component of the core factor (CF) rDNA transcription factor complex; Spider biofilm induced	1.15155	4.22685	0.000849207	0.0041514	false	1.06806	4.24499	0.00202877	0.00680476	false	1.29887	4.46114	8.68129e-05	0.00032213	false	-1.17522	5.22556	0.000174555	0.00214748	false
orf19.1589.1		Has domain(s) with predicted pyridoxal phosphate binding, transferase activity, transferring nitrogenous groups activity and role in biosynthetic process	1.56061	6.39274	3.51181e-05	0.000270714	false	0.336593	5.66409	0.338653	> 0.05	false	-0.524293	5.30543	0.159069	> 0.05	false	0.734416	2.98281	0.141136	> 0.05	false
orf19.1590		Ortholog of C. parapsilosis CDC317 : CPAR2_212800, Debaryomyces hansenii CBS767 : DEHA2F08690g, Candida dubliniensis CD36 : CD36_18970 and Candida guilliermondii ATCC 6260 : PGUG_01488	0.200909	4.23191	0.569282	> 0.05	false	0.140586	4.27176	0.679645	> 0.05	false	0.179152	4.35155	0.58426	> 0.05	false	-0.372782	3.82554	0.229843	> 0.05	false
orf19.1591	ERG10	Acetyl-CoA acetyltransferase; role in ergosterol biosynthesis; soluble in hyphae; changes in protein abundance associated with azole resistance; fluconazole or ketoconazole induced; macrophage-downregulated protein; GlcNAc-induced protein	-1.12107	9.26774	0.00115549	0.0053955	false	-1.36776	9.26686	7.08096e-05	0.000352029	false	-1.30632	9.34297	0.000216487	0.000740276	false	-0.181616	9.13885	0.516793	0.000740276	false
orf19.1592		Protein of unknown function; Spider biofilm induced	-1.25475	4.91136	7.38479e-05	0.000501444	false	-1.01023	5.05826	0.00121052	0.00431644	false	-1.02861	5.11206	0.00102261	0.00294931	false	0.00457737	4.75852	1	0.00294931	false
orf19.1595		Ortholog(s) have endoplasmic reticulum localization	0.195942	4.86072	0.538583	> 0.05	false	0.32507	5.0036	0.286536	> 0.05	false	0.411579	5.11115	0.169449	> 0.05	false	0.0195078	4.32902	0.950187	> 0.05	false
orf19.1596	FGR28	Protein lacking an ortholog in S. cerevisiae; transposon mutation affects filamentous growth; possibly an essential gene, disruptants not obtained by UAU1 method	0.689496	5.05763	0.0233572	> 0.05	false	0.467397	4.99757	0.11866	> 0.05	false	0.352934	4.99052	0.23424	> 0.05	false	0.432544	4.37791	0.124362	> 0.05	false
orf19.1597	ABG1	Vacuolar membrane protein; depletion causes abnormal vacuolar morphology, cell separation defect, sensitivity to cell wall stress, increased hyphal branching; essential, no mammalian homolog; Cyr1-regulated; rat catheter biofilm repressed	-0.178722	7.75624	0.572203	> 0.05	false	-0.326727	7.76102	0.291825	> 0.05	false	-0.782113	7.63478	0.0141617	0.0299398	false	0.0153275	7.70571	0.956263	0.0299398	false
orf19.1598	ERG24	C-14 sterol reductase, has a role in ergosterol biosynthesis; mutation confers increased sensitivity to dyclonine; rat catheter and Spider biofilm repressed	-1.64428	6.75547	4.07154e-08	7.3178e-07	false	-1.66582	6.82158	1.65519e-08	2.23871e-07	false	-1.70764	6.87088	9.95223e-09	7.64533e-08	false	-0.185362	6.55859	0.500365	> 0.05	false
orf19.1599		Ortholog of Candida albicans WO-1 : CAWG_06018	1.7089	-0.126812	0.0325766	> 0.05	false	1.40993	-0.240658	0.112842	> 0.05	false	2.58324	0.599264	0.000310763	0.00102228	false	1.47693	-1.63519	0.326015	0.00102228	false
orf19.1600		Has domain(s) with predicted DNA binding activity	-0.72096	5.31508	0.013559	0.0425665	false	-0.0751787	5.66735	0.794428	> 0.05	false	0.0875427	5.80812	0.760703	> 0.05	false	-0.357693	5.39256	0.165739	> 0.05	false
orf19.1601	RPL3	Ribosomal protein, large subunit; induced by ciclopirox olamine treatment; genes encoding cytoplasmic ribosomal subunits are downregulated upon phagocytosis by murine macrophages; Hap43-induced gene; Spider biofilm repressed	-0.165125	10.8461	0.637083	> 0.05	false	-1.5458	10.4236	1.23672e-05	7.62852e-05	false	-1.01071	10.6388	0.00582117	0.01374	false	-0.632348	11.8628	0.0220367	0.01374	false
orf19.1604		Predicted Gal4-like DNA-binding transcription factor; Spider biofilm induced	-1.13857	5.98789	0.000152988	0.00093418	false	-0.67862	6.22041	0.0133776	0.0341638	false	-0.161513	6.50186	0.575421	> 0.05	false	-0.780217	5.9021	0.00266382	0.0201616	false
orf19.1605	PMS1	Putative DNA mismatch repair factor; ortholog of S. cerevisiae PMS1 which is an ATP-binding protein involved in DNA mismatch repair	-0.0971634	2.98178	0.818791	> 0.05	false	-0.215381	2.99242	0.633234	> 0.05	false	0.636161	3.51433	0.0728948	> 0.05	false	0.336535	4.23189	0.275219	> 0.05	false
orf19.1606		Protein of unknown function; Plc1-regulated	-0.855839	3.96244	0.0148617	0.0458572	false	-1.04896	3.96143	0.00427655	0.0128509	false	-0.370069	4.28778	0.257168	> 0.05	false	0.107081	4.4228	0.710212	> 0.05	false
orf19.1607	ALR1	Putative transporter of divalent cations; hyphal-induced expression; rat catheter biofilm induced	0.992017	6.77386	0.000694461	0.00347126	false	1.19679	6.98638	1.33183e-05	8.11762e-05	false	1.19511	7.04334	4.37499e-05	0.000171704	false	-0.0521236	8.11186	0.857939	0.000171704	false
orf19.1608		Ortholog(s) have cytosol, nucleus localization	2.58327	3.6118	1.52509e-05	0.000128401	false	2.69001	3.78344	7.69816e-07	6.60635e-06	false	3.90158	4.92975	4.94396e-27	4.39551e-25	true	0.2993	2.13839	0.438705	> 0.05	false
orf19.1609		Ortholog(s) have role in endonucleolytic cleavage in ITS1 to separate SSU-rRNA from 5.8S rRNA and LSU-rRNA from tricistronic rRNA transcript (SSU-rRNA, 5.8S rRNA, LSU-rRNA) and nucleolus, spindle pole body localization	1.07856	4.54523	0.0014228	0.00642332	false	0.96711	4.54516	0.00460413	0.0137546	false	2.06225	5.4066	5.27823e-10	4.90868e-09	true	-1.80377	7.37251	1.04274e-05	0.000219079	false
orf19.1610		Putative protein of unknown function, transcription is activated in the presence of elevated CO2	1.29285	4.01574	0.000365961	0.00198135	false	1.49736	4.23822	4.87374e-05	0.000252707	false	1.28037	4.1377	0.000439415	0.00140335	false	1.07506	3.13943	0.00206853	0.0164202	false
orf19.1611		Protein of unknown function; Spider biofilm induced	2.13796	2.12271	9.65942e-06	8.54759e-05	false	1.89174	2.01207	0.000333107	0.00139433	false	2.48857	2.54168	2.8225e-08	1.98948e-07	false	0.340334	1.42235	0.472411	> 0.05	false
orf19.1613	ILV2	Putative acetolactate synthase; regulated by Gcn4p; induced by amino acid starvation (3-AT treatment); stationary phase enriched protein	1.94987	9.8632	5.35763e-08	9.45097e-07	false	0.693805	9.04226	0.0360998	> 0.05	false	0.523233	8.99776	0.12105	> 0.05	false	-0.295371	9.34816	0.272101	> 0.05	false
orf19.1614	MEP1	Ammonium permease; Mep1 more efficient permease than Mep2, Mep2 has additional regulatory role; 11 predicted transmembrane regions; low mRNA abundance; hyphal downregulated; flow model biofilm induced	-0.0606124	8.12542	0.847275	> 0.05	false	0.243811	8.35514	0.43678	> 0.05	false	0.216196	8.39878	0.49989	> 0.05	false	-0.489977	5.74301	0.121415	> 0.05	false
orf19.1616	FGR23	Protein of unknown function; repressed by a1/alpha2 in white-phase cells, a-specific, alpha factor-induced; Hap43-repressed; flow model biofilm induced; Tn mutation affects filamentous growth;	-0.0156268	4.44278	1	> 0.05	false	-0.134507	4.45592	0.800245	> 0.05	false	0.975375	5.14694	0.0249673	0.0488647	false	0.166175	4.66409	0.524787	0.0488647	false
orf19.1617		Protein similar to S. cerevisiae Ydr282cp; transposon mutation affects filamentous growth; Hap43p-repressed gene	0.49789	5.03906	0.0917587	> 0.05	false	0.568952	5.1541	0.0528859	> 0.05	false	0.93172	5.43984	0.00111213	0.00319092	false	-0.157812	4.41723	0.575597	0.00319092	false
orf19.1618	GFA1	Glucosamine-6-phosphate synthase, homotetrameric enzyme of chitin/hexosamine biosynthesis; inhibited by UDP-GlcNAc, FMDP, N-acyl peptide, kanosamine-6-P; functional homolog of S. cerevisiae Gfa1p; Cagrowth-phase regulated; catalytic Cys	0.934873	9.38564	0.00621941	0.0223443	false	0.352318	9.10324	0.299414	> 0.05	false	0.622835	9.3197	0.0670046	> 0.05	false	0.0167488	9.36689	0.952046	> 0.05	false
orf19.1618.1		Ortholog(s) have cytosol localization	0.968651	4.5355	0.0041312	0.0157479	false	1.39393	4.90322	3.18298e-06	2.312e-05	false	1.61331	5.1213	4.96714e-08	3.36937e-07	false	0.525909	5.67542	0.0548201	> 0.05	false
orf19.1619		Putative kinase subunit of RNA polymerase II carboxy-terminal domain kinase I; possibly an essential gene, disruptants not obtained by UAU1 method	0.48755	7.03306	0.0899909	> 0.05	false	0.454012	7.08619	0.107717	> 0.05	false	0.546451	7.19896	0.0619961	> 0.05	false	0.16245	6.66468	0.543518	> 0.05	false
orf19.1620		Protein of unknown function; induced by alpha pheromone in SpiderM medium	3.61426	0.213198	3.53132e-05	0.000271903	false	3.20878	-0.00912036	0.000534971	0.00213639	false	4.58533	1.14065	9.49284e-10	8.48502e-09	false	-0.621382	-0.680968	0.478915	> 0.05	false
orf19.1621	GPA2	G-protein alpha subunit; regulates filamentous growth, copper resistance; involved in cAMP-mediated glucose signaling; reports differ on role in cAMP-PKA pathway, MAP kinase cascade; Gpr1 C terminus binds Gpa2; regulates HWP1 and ECE1	-0.249882	6.3912	0.384688	> 0.05	false	0.0819466	6.62504	0.769143	> 0.05	false	0.425851	6.871	0.131484	> 0.05	false	0.167671	7.09633	0.543206	> 0.05	false
orf19.1622	YCG1	Putative condensin G	0.851378	5.69847	0.00506704	0.0188019	false	0.740895	5.70157	0.015382	0.0384724	false	1.51323	6.28835	1.55889e-06	8.1719e-06	false	0.4748	6.26676	0.0682469	8.1719e-06	false
orf19.1623	CAP1	AP-1 bZIP transcription factor; apoptotic, oxidative stress response/resistance, multidrug resistance; nuclear in oxidative stress; complements S. cerevisiae yap1 mutant; oralpharyngeal candidasis-, human neutrophil, Spider biofilm induced	0.694669	7.21711	0.0334274	> 0.05	false	0.847774	7.38644	0.00843708	0.0231421	false	0.532076	7.24982	0.0977805	> 0.05	false	0.364767	6.39995	0.176083	> 0.05	false
orf19.1624		Non-catalytic subunit of N-terminal acetyltransferase of the NatC type; flow model biofilm repressed	-0.481503	6.02199	0.0890922	> 0.05	false	-0.232378	6.20363	0.396722	> 0.05	false	-0.173944	6.28988	0.541858	> 0.05	false	-0.357976	6.64042	0.194623	> 0.05	false
orf19.1624.1		Ortholog of C. parapsilosis CDC317 : CPAR2_405060 and Candida orthopsilosis Co 90-125 : CORT0C04470	0.858138	0.943889	0.208173	> 0.05	false	0.547013	0.834534	0.4244	> 0.05	false	0.346211	0.783968	0.755803	> 0.05	false	0.119352	0.972467	0.882815	> 0.05	false
orf19.1625		Putative ubiquinone oxidoreductase; repressed by nitric oxide; Hap43p-repressed	0.503724	6.94731	0.0710465	> 0.05	false	0.52645	7.03338	0.0556436	> 0.05	false	0.290775	6.95727	0.300332	> 0.05	false	0.0797197	6.98723	0.770137	> 0.05	false
orf19.1626		Deoxyhypusine synthase; catalyzes formation of deoxyhypusine, the first step in hypusine biosynthesis; Spider biofilm repressed	-0.628968	5.71052	0.0262373	> 0.05	false	-0.894248	5.68217	0.00194979	0.00658621	false	-0.363397	5.95169	0.216836	> 0.05	false	-0.699025	7.29525	0.0117277	> 0.05	false
orf19.1628	LAP41	Putative aminopeptidase yscI precursor; mutant is viable; protein present in exponential and stationary growth phase yeast cultures; Spider biofilm repressed	-0.847869	9.09807	0.0102872	0.0340084	false	-0.828347	9.17754	0.01095	0.0288368	false	-1.4519	9.04098	1.73795e-05	7.36256e-05	false	0.33671	7.87551	0.241382	7.36256e-05	false
orf19.163	PAN6	Ortholog(s) have pantoate-beta-alanine ligase activity, role in pantothenate biosynthetic process and cytosol, nucleus localization	-0.861434	5.20071	0.00642957	0.0230002	false	-0.785261	5.29872	0.0133171	0.0340355	false	-0.365743	5.52818	0.248383	> 0.05	false	0.102702	6.12219	0.690866	> 0.05	false
orf19.1630		Ortholog(s) have cytoplasm localization	-0.226644	7.22861	0.429606	> 0.05	false	-0.217244	7.30529	0.43373	> 0.05	false	-0.350318	7.30381	0.219684	> 0.05	false	-0.210181	7.31108	0.437858	> 0.05	false
orf19.1631	ERG6	Delta(24)-sterol C-methyltransferase, converts zymosterol to fecosterol, ergosterol biosynthesis; mutation confers nystatin resistance; Hap43, GlcNAc-, fluconazole-induced; upregulated in azole-resistant strain; Spider biofilm repressed	-1.54696	7.90657	9.74055e-07	1.18091e-05	false	-1.7225	7.9357	1.10071e-07	1.19342e-06	false	-1.26086	8.11618	0.000186744	0.000646527	false	-0.518661	8.14535	0.0955355	0.000646527	false
orf19.1632		Ortholog(s) have cytosol, nucleus localization	-1.61048	7.84787	6.62564e-06	6.20502e-05	false	-1.50616	7.94646	1.84767e-05	0.000107909	false	-1.92704	7.90662	1.8252e-07	1.11964e-06	false	0.265788	5.13572	0.310007	> 0.05	false
orf19.1633	UTP4	Putative U3 snoRNA-associated protein; Hap43-induced; physically interacts with TAP-tagged Nop1; Spider biofilm induced	1.37114	4.21732	0.00149242	0.00667483	false	1.58152	4.44546	0.000145264	0.000668981	false	3.03047	5.68639	3.96818e-14	6.58204e-13	true	-1.85288	7.74915	1.47939e-05	0.000285103	false
orf19.1634		Has domain(s) with predicted fatty-acyl-CoA binding activity	-0.212975	6.53009	0.454427	> 0.05	false	-0.277438	6.57255	0.319721	> 0.05	false	-0.80558	6.41501	0.00484914	0.0117536	false	0.2253	5.82799	0.371727	0.0117536	false
orf19.1635	RPL12	Ribosomal protein L12, 60S ribosomal subunit; downregulated by human whole blood or polymorphonuclear cells; genes encoding cytoplasmic ribosomal subunits are downregulated upon phagocytosis by macrophage; Tbf1p-activated; Hap43p-induced	0.00956893	10.2442	0.977186	> 0.05	false	-1.51584	9.74423	5.9356e-06	3.96579e-05	false	-0.905194	9.98764	0.00839886	0.019023	false	-0.699371	11.0794	0.0114159	0.019023	false
orf19.1636	STE50	Protein with sterile alpha motif (SAM) and Ras-associated domain (RAD); similar to S. cerevisiae Rad50p, which is involved in signal transduction via interaction with and regulation of MAPKKK	0.262953	5.03384	0.365487	> 0.05	false	0.404964	5.18582	0.166586	> 0.05	false	0.267872	5.16751	0.343241	> 0.05	false	-0.338144	5.47341	0.184884	> 0.05	false
orf19.1637		Ortholog(s) have cytosol, nucleus localization	-0.266181	5.99735	0.353604	> 0.05	false	0.156364	6.27755	0.572917	> 0.05	false	-0.12332	6.1951	0.674324	> 0.05	false	0.484481	5.41674	0.0590108	> 0.05	false
orf19.1638		Has domain(s) with predicted zinc ion binding activity, role in ER to Golgi vesicle-mediated transport, intracellular protein transport and COPII vesicle coat localization	0.215212	6.60097	0.44433	> 0.05	false	0.427676	6.79175	0.117296	> 0.05	false	0.196588	6.72211	0.494841	> 0.05	false	0.497579	5.68876	0.0585803	> 0.05	false
orf19.1639		Has domain(s) with predicted oxidoreductase activity and role in oxidation-reduction process	1.39461	2.63536	0.00146387	0.00655548	false	1.41523	2.72979	0.000899947	0.00337885	false	1.23192	2.65686	0.00185929	0.00504795	false	0.667477	1.38049	0.129687	0.00504795	false
orf19.164		Ortholog(s) have lipase activity and peroxisomal matrix localization	0	-2.15937	1	> 0.05	false	-5.12548e-15	-2.2195	1	> 0.05	false	0	-2.09868	1	> 0.05	false	0	-2.62874	1	> 0.05	false
orf19.1641		Ortholog(s) have cytosol, nucleus localization	0.00616166	2.44805	1	> 0.05	false	-0.298722	2.37055	0.571746	> 0.05	false	0.754121	2.99473	0.0836109	> 0.05	false	0.790937	0.402756	0.164581	> 0.05	false
orf19.1642		Ortholog of S. cerevisiae Loc1, a nuclear protein involved in asymmetric localization of ASH1 mRNA in S. cerevisiae; Hap43-induced gene; Spider biofilm induced	1.80066	2.8501	0.000505671	0.00264042	false	2.07685	3.14344	4.05806e-05	0.000216647	false	3.41968	4.32602	4.00613e-13	5.79455e-12	true	-1.68626	6.3886	1.10469e-05	0.000229473	false
orf19.1643		Ortholog(s) have serine-type endopeptidase activity, role in regulation of mitochondrion organization, signal peptide processing and mitochondrial inner membrane localization	-0.257051	5.52485	0.36966	> 0.05	false	0.0959813	5.76935	0.740474	> 0.05	false	0.642879	6.13717	0.0279165	> 0.05	false	-0.114377	6.80395	0.671167	> 0.05	false
orf19.1646		Ortholog(s) have role in endonucleolytic cleavage in 5'-ETS of tricistronic rRNA transcript (SSU-rRNA, 5.8S rRNA and LSU-rRNA), more	1.4288	3.8777	0.00510172	0.0189054	false	1.89483	4.30399	0.000118144	0.000557921	false	3.21992	5.47302	2.6047e-11	2.90437e-10	true	-2.14346	7.46284	5.51058e-07	2.43341e-05	true
orf19.1647		Ortholog(s) have role in ascospore wall assembly	1.055	0.860659	0.0890623	> 0.05	false	0.854113	0.811244	0.216022	> 0.05	false	0.785125	0.82987	0.247228	> 0.05	false	-0.256405	0.587552	0.66993	> 0.05	false
orf19.1648	RAD50	Putative DNA double-strand break repair factor; involved in response to oxidative stress and drug resistance; flow model biofilm repressed	-0.649191	6.77322	0.0265009	> 0.05	false	-0.923791	6.74362	0.00130754	0.00461795	false	-0.932296	6.79979	0.00175498	0.00479206	false	-0.0494204	6.59762	0.854075	0.00479206	false
orf19.1649	RNA1	Putative GTPase-activating protein; protein level decreases in stationary phase cultures; Spider biofilm repressed	0.103854	8.18132	0.744046	> 0.05	false	0.571161	8.51485	0.0705009	> 0.05	false	1.31066	9.05886	0.000198783	0.000685358	false	1.11608	8.81921	0.000734909	0.00717576	false
orf19.1650	TOM6	Predicted component of the TOM (translocase of outer membrane) complex, involved in protein import into mitochondria	-1.08704	6.34065	0.000163349	0.000991926	false	-0.956871	6.45527	0.000781395	0.00297675	false	-0.950888	6.51642	0.000885185	0.00259333	false	-0.250321	6.56911	0.347777	0.00259333	false
orf19.1651		Ortholog of Candida dubliniensis CD36 : CD36_81960, Candida tropicalis MYA-3404 : CTRG_02378 and Candida albicans WO-1 : CAWG_02525	1.14985	1.73424	0.0247615	> 0.05	false	1.75513	2.24203	0.000340859	0.0014232	false	2.0915	2.55936	8.34539e-06	3.78037e-05	false	0.853148	0.429285	0.131105	3.78037e-05	false
orf19.1652	POX1-3	Predicted acyl-CoA oxidase; farnesol regulated; stationary phase enriched protein; Spider biofilm induced	0.289133	7.86724	0.383571	> 0.05	false	0.763608	8.22004	0.0211309	> 0.05	false	0.309076	8.00941	0.362589	> 0.05	false	0.334933	6.77662	0.228138	> 0.05	false
orf19.1653		Has domain(s) with predicted integral to membrane localization	-1.15759	6.38345	0.000573782	0.00295214	false	-1.39674	6.38448	2.14493e-05	0.000122662	false	-1.69713	6.36689	6.17933e-07	3.50671e-06	false	0.402679	5.17967	0.125898	3.50671e-06	false
orf19.1654		Predicted membrane protein; induced by prostaglandins	-0.650216	6.39975	0.103156	> 0.05	false	-1.07281	6.32094	0.00677805	0.019216	false	-1.07036	6.38106	0.00785003	0.0179015	false	-0.0290093	5.70484	0.914135	0.0179015	false
orf19.1655	PXP2	Putative acyl-CoA oxidase; enzyme of fatty acid beta-oxidation; induced during macrophage infection; opaque specific transcript; putative peroxisome targeting signal; Spider biofilm induced	1.7397	4.67162	9.01312e-08	1.49501e-06	false	1.46443	4.54218	3.22096e-05	0.000175325	false	1.77825	4.83202	3.70801e-06	1.80474e-05	false	1.02406	1.70746	0.00951289	1.80474e-05	false
orf19.1655.3		Ortholog(s) have role in cation transport, regulation of membrane potential and plasma membrane localization	-0.46157	7.72451	0.137456	> 0.05	false	-0.233849	7.89728	0.438955	> 0.05	false	-0.79605	7.72388	0.0117257	0.025435	false	0.0859085	7.51208	0.751156	0.025435	false
orf19.1656		Protein with a predicted FYVE/PHD zinc finger domain; Hap43-repressed; Spider biofilm induced	-0.878237	5.86855	0.00215478	0.00908222	false	-0.283808	6.18013	0.305052	> 0.05	false	-0.461854	6.16109	0.107201	> 0.05	false	-0.242921	5.0787	0.380196	> 0.05	false
orf19.1658		Ortholog(s) have cell cortex, cellular bud neck, mating projection tip localization	0.487837	8.37597	0.142843	> 0.05	false	0.372271	8.38223	0.261624	> 0.05	false	-0.0972433	8.19462	0.774372	> 0.05	false	0.0081287	7.58478	0.977285	> 0.05	false
orf19.1659	ALG8	Putative glucosyltransferase involved in cell wall mannan biosynthesis; transcription is elevated in nik1 and sln1 homozygous null mutants, but not in the chk1 null mutant; possibly an essential gene, disruptants not obtained by UAU1 method	-0.0970628	4.88797	0.757785	> 0.05	false	0.0742291	5.04563	0.795105	> 0.05	false	0.104698	5.12036	0.714467	> 0.05	false	0.00996824	5.54638	0.975784	> 0.05	false
orf19.166	ASG1	Gal4p family zinc-finger transcription factor with similarity to S. cerevisiae Asg1p	-0.613248	6.08305	0.115231	> 0.05	false	-0.221574	6.3228	0.566499	> 0.05	false	0.246861	6.61647	0.526723	> 0.05	false	0.406116	6.19716	0.133922	> 0.05	false
orf19.1661	DBP5	Ortholog(s) have RNA helicase activity, RNA-dependent ATPase activity, inositol hexakisphosphate binding activity and role in mRNA export from nucleus, translational termination	-0.520514	7.81327	0.0904439	> 0.05	false	-0.675284	7.82385	0.0260623	> 0.05	false	-0.410861	7.99045	0.189408	> 0.05	false	-0.20627	8.5066	0.445396	> 0.05	false
orf19.1662		Ortholog(s) have structural constituent of ribosome activity and mitochondrial small ribosomal subunit localization	-0.698501	5.40216	0.0312591	> 0.05	false	-0.251096	5.66231	0.371554	> 0.05	false	0.465566	6.09417	0.10448	> 0.05	false	-0.619896	7.16524	0.0236473	> 0.05	false
orf19.1663	MNT2	Alpha-1,2-mannosyl transferase; adds 3rd mannose in cell-wall mannoprotein biosynthesis; partially redundant with Mnt1; role in adherence and virulence; expressed in yeast and hyphae; fungal-specific; Hap43-induced; Spider biofilm induced	0.516944	5.93724	0.0707941	> 0.05	false	0.834323	6.2054	0.00267174	0.00861885	false	1.12496	6.45637	8.79238e-05	0.000325528	false	-0.209465	7.19623	0.503208	0.000325528	false
orf19.1664		Protein of unknown function; expression downregulated in an ssr1 null mutant	0.649852	6.34778	0.0206096	> 0.05	false	0.0814805	6.09985	0.770064	> 0.05	false	0.219312	6.23127	0.444266	> 0.05	false	0.927961	6.39245	0.000522295	0.00538279	false
orf19.1665	MNT1	Alpha-1,2-mannosyl transferase; predicted type II Golgi membrane protein; adds 2nd mannose during cell-wall mannoprotein biosynthesis; required for wild-type virulence and adherence to epithelial cells; Hap43-induced	-0.08582	9.84165	0.800571	> 0.05	false	-0.365299	9.78533	0.270418	> 0.05	false	-0.479045	9.79528	0.158473	> 0.05	false	-0.0760122	10.3506	0.784701	> 0.05	false
orf19.1666		Ortholog of Dig2, a MAP kinase-responsive inhibitor of Ste12; regulates mating-specific genes and invasive growth in S. cerevisiae; induced by alpha pheromone in SpiderM medium	0.219586	5.47233	0.46648	> 0.05	false	0.463936	5.68173	0.100448	> 0.05	false	0.954511	6.04462	0.00093107	0.00270993	false	-0.392897	6.77836	0.212414	0.00270993	false
orf19.1667		Protein with a predicted SWI/SNF-related matrix-associated actin-dependent regulator of chromatin subfamily domain; Hap43-repressed gene	0.525009	5.30957	0.070169	> 0.05	false	0.470172	5.35019	0.10527	> 0.05	false	0.676291	5.53202	0.0207047	0.0415714	false	0.181767	5.23224	0.47146	0.0415714	false
orf19.1667.1		Ortholog(s) have role in mitochondrial respiratory chain complex IV assembly and mitochondrial intermembrane space, nucleus localization	-0.673133	2.33161	0.136651	> 0.05	false	-0.720327	2.37239	0.114217	> 0.05	false	-0.450591	2.54977	0.266759	> 0.05	false	-0.447401	2.59342	0.213395	> 0.05	false
orf19.1668		Protein of unknown function; expression downregulated in an ssr1 null mutant	-0.609263	3.85317	0.161352	> 0.05	false	-0.384152	4.0152	0.3837	> 0.05	false	0.197693	4.35924	0.588955	> 0.05	false	0.244	4.70799	0.351606	> 0.05	false
orf19.1669	AFG3	Similar to S. cerevisiae Afg3p, a subunit of the mitochondrial inner membrane m-AAA protease; likely to be essential for growth, based on an insertional mutagenesis strategy	-0.867515	7.40632	0.00701784	0.0245891	false	-0.553153	7.59818	0.0790195	> 0.05	false	-0.352155	7.74211	0.289513	> 0.05	false	0.000251223	7.72018	1	> 0.05	false
orf19.1670	BRO1	Class E vacuolar protein sorting factor; role in transport from multivesicular body to vacuole; not involved in Rim101 pathway; macrophage and pseudohyphal-repressed; flow model biofilm induced	-0.122981	6.5115	0.664999	> 0.05	false	-0.32363	6.49064	0.253978	> 0.05	false	-0.57565	6.44246	0.0433891	> 0.05	false	0.0954548	5.70859	0.717152	> 0.05	false
orf19.1671	UTR2	Putative GPI anchored cell wall glycosidase; role in adhesion, hyphal growth on Spider (not serum) medium; chitin-binding, glycosyl hydrolase domains; induced during cell wall regeneration; mRNA in yeast-form cells; Spider biofilm induced	0.411455	7.41055	0.173447	> 0.05	false	0.720524	7.6678	0.0195879	0.0476339	false	1.10235	7.97544	0.000541915	0.00168226	false	-0.0454995	7.77441	0.867995	0.00168226	false
orf19.1671.1		Predicted ORF added to Assembly 21 based on sequence re-analysis	1.29638	-0.749478	0.495666	> 0.05	false	1.1834	-0.749581	0.512291	> 0.05	false	2.02037	-0.244361	0.080649	> 0.05	false	0.0147817	-2.04338	1	> 0.05	false
orf19.1672		Alpha subunit of COPI vesicle coatomer complex; role in ER to Golgi vesicle-mediated transport, retrograde vesicle-mediated transport, Golgi to ER transport; flow model biofilm repressed	0.00515279	9.55257	0.987773	> 0.05	false	-0.165634	9.54209	0.611851	> 0.05	false	-0.566131	9.42554	0.0891081	> 0.05	false	0.103303	9.60092	0.703357	> 0.05	false
orf19.1673	PPT1	Putative serine/threonine phosphatase; induced in high iron	1.04259	3.98875	0.0034034	0.0133729	false	1.38481	4.30184	0.000209145	0.000922951	false	2.2909	5.0582	9.17881e-13	1.23645e-11	true	-0.00907806	6.2618	0.974534	> 0.05	false
orf19.1674	CDC53	Cullin, a scaffold subunit of the SCF ubiquitin-ligase complexes; depletion leads to increased filamentous growth and premature cell death	-0.0444692	7.41944	0.886441	> 0.05	false	0.10395	7.56707	0.748135	> 0.05	false	0.35285	7.76013	0.287561	> 0.05	false	0.0240393	7.46598	0.929699	> 0.05	false
orf19.1675		Ortholog(s) have role in positive regulation of catalytic activity	-0.398043	6.04122	0.180531	> 0.05	false	-0.39426	6.11454	0.171705	> 0.05	false	-0.29116	6.21937	0.322108	> 0.05	false	-0.161775	6.13265	0.527851	> 0.05	false
orf19.1676		Predicted potassium ion transporter; Spider biofilm induced	-1.11237	4.82037	0.000564463	0.00290869	false	-1.2006	4.86113	0.000201716	0.000897293	false	-0.828646	5.04789	0.00878355	0.0197401	false	-0.758127	5.0142	0.0232709	0.0197401	false
orf19.1677		Protein of unknown function; transcript detected on high-resolution tiling arrays	0	-2.15937	1	> 0.05	false	-5.12548e-15	-2.2195	1	> 0.05	false	0	-2.09868	1	> 0.05	false	0	-2.62874	1	> 0.05	false
orf19.1678		Protein of unknown function; transcript detected on high-resolution tiling arrays	-0.623126	1.33956	0.361538	> 0.05	false	-0.156811	1.59137	0.879245	> 0.05	false	0.384658	1.93742	0.425656	> 0.05	false	-0.369744	2.31719	0.312834	> 0.05	false
orf19.1679		Ortholog of C. parapsilosis CDC317 : CPAR2_503570, Debaryomyces hansenii CBS767 : DEHA2D15378g, Candida dubliniensis CD36 : CD36_81550 and Pichia stipitis Pignal : PICST_29773	2.45148	1.32407	0.00028819	0.00161891	false	2.2692	1.28064	0.00140873	0.0049387	false	2.97939	1.86636	1.05097e-06	5.68359e-06	false	1.21315	-0.377014	0.0918572	5.68359e-06	false
orf19.168		Ortholog(s) have role in U4 snRNA 3'-end processing, exonucleolytic trimming to generate mature 3'-end of 5.8S rRNA from tricistronic rRNA transcript (SSU-rRNA, 5.8S rRNA and LSU-rRNA), more	1.09392	3.9338	0.00345993	0.0135609	false	1.29732	4.15051	0.000401268	0.00165675	false	1.71409	4.5147	4.63314e-07	2.67478e-06	false	-0.83441	5.76096	0.00373671	0.0265633	false
orf19.1680	TFP1	Subunit of vacuolar H+-ATPase; stationary phase enriched protein; sumoylation target; Spider biofilm repressed	-0.334181	9.38313	0.303224	> 0.05	false	-0.406118	9.42427	0.211799	> 0.05	false	-0.810325	9.32257	0.0149714	0.0313633	false	-0.0993762	9.05482	0.713744	0.0313633	false
orf19.1681		Ortholog of C. parapsilosis CDC317 : CPAR2_503590, Candida tenuis NRRL Y-1498 : CANTEDRAFT_115755, Debaryomyces hansenii CBS767 : DEHA2D15334g and Candida dubliniensis CD36 : CD36_81530	-0.131574	4.27142	0.711374	> 0.05	false	0.355915	4.59786	0.28569	> 0.05	false	0.417694	4.69141	0.202044	> 0.05	false	1.01726	3.54519	0.00126055	0.0111625	false
orf19.1682		Membrane protein; Hap43p-repressed gene; repressed by nitric oxide	-0.234326	8.9144	0.464293	> 0.05	false	-0.12772	9.03694	0.693994	> 0.05	false	-0.427139	8.96005	0.190744	> 0.05	false	-0.1856	8.64187	0.491676	> 0.05	false
orf19.1683	PPH21	Putative protein phosphatase of the Type 2A-related family (serine/threonine-specific), similar to S. cerevisiae Pph21p; caspofungin repressed; possibly an essential gene, disruptants not obtained by UAU1 method	-0.768436	7.68786	0.0156918	0.0479528	false	-0.947738	7.69608	0.0023838	0.00783786	false	-1.2427	7.66049	0.000111692	0.000404104	false	0.0752265	7.01452	0.780702	0.000404104	false
orf19.1684		Ortholog of C. parapsilosis CDC317 : CPAR2_503620, Debaryomyces hansenii CBS767 : DEHA2D15268g, Candida dubliniensis CD36 : CD36_81500 and Pichia stipitis Pignal : PICST_66925	0.172271	5.33023	0.594076	> 0.05	false	0.350161	5.50003	0.260754	> 0.05	false	0.12282	5.43488	0.704219	> 0.05	false	0.11723	5.22284	0.647892	> 0.05	false
orf19.1685	ZCF7	Predicted Zn(II)2Cys6 transcription factor; mutant shows reduced colony wrinkling on Spider medium and is unable to utilize mannitol as a carbon source; mutants have increased colonization of mouse kidneys	-0.155989	4.49571	0.631427	> 0.05	false	0.0135018	4.65047	0.983786	> 0.05	false	-0.0370484	4.6838	0.902435	> 0.05	false	-0.191485	4.4186	0.509583	> 0.05	false
orf19.1686		Ortholog(s) have mitochondrion localization	0.0455399	4.92916	0.885767	> 0.05	false	-0.0133532	4.97101	0.970812	> 0.05	false	0.00583241	5.03944	1	> 0.05	false	0.0536392	4.70641	0.844102	> 0.05	false
orf19.1687		Ortholog of S. cerevisiae Prp43, an RNA helicase in the DEAH-box family that functions in both RNA polymerase I and polymerase II transcript metabolism; Hap43-induced gene	2.70359	4.78069	1.7413e-10	5.32615e-09	true	2.86831	4.99615	2.91959e-12	8.53851e-11	true	4.04797	6.1199	5.19131e-21	2.40386e-19	true	-2.07014	7.52755	2.2082e-06	6.69284e-05	true
orf19.169	CHO2	Putative phosphatidyl-ethanolamine N-methyltransferase; fungal-specific (no human or murine homolog); amphotericin B repressed; Hap43p-induced gene	0.487971	5.19466	0.0989099	> 0.05	false	0.783303	5.44792	0.0106634	0.0282045	false	1.60645	6.07665	1.27675e-07	8.02392e-07	false	-0.667508	6.77381	0.0243565	> 0.05	false
orf19.1690	TOS1	Protein similar to alpha agglutinin anchor subunit; secreted; exogenously expressed protein is a substrate for Kex2 processing in vitro; fluconazole-induced; induced by alpha pheromone in SpiderM medium; Hap43-induced	-0.215902	9.21554	0.506631	> 0.05	false	-0.202357	9.29438	0.532634	> 0.05	false	0.287787	9.60174	0.390042	> 0.05	false	-0.249967	9.86474	0.360831	> 0.05	false
orf19.1691		Plasma-membrane-localized protein; filament induced; Hog1, ketoconazole, fluconazole and hypoxia-induced; regulated by Nrg1, Tup1, Upc2; induced by prostaglandins; flow model biofilm induced; rat catheter and Spider biofilm repressed	-4.90382	8.99011	4.80029e-08	8.55837e-07	true	-4.68782	9.06978	1.61223e-07	1.64883e-06	true	-6.621	9.08831	2.20781e-13	3.29344e-12	true	0.544274	7.32456	0.253191	> 0.05	false
orf19.1693	CAS4	RAM cell wall integrity signaling network protein; cell separation, azole sensitivity; needed for hyphal growth; insertion mutation near 3' end of gene increases caspofungin sensitivity; pheromone/hyphal induced; flow biofilm repressed	-0.277434	6.44281	0.337981	> 0.05	false	0.0802241	6.68838	0.78507	> 0.05	false	0.713871	7.10752	0.0138494	0.0294102	false	-0.209716	7.16146	0.450969	0.0294102	false
orf19.1697		Ortholog(s) have role in cytoplasmic translation and cytoplasm, polysomal ribosome localization	-0.338604	5.22132	0.286255	> 0.05	false	0.0498879	5.47889	0.859901	> 0.05	false	0.830385	5.98748	0.00445674	0.0109055	false	-0.420918	7.64174	0.123102	0.0109055	false
orf19.1698		Ortholog(s) have role in actin cytoskeleton organization and actin cortical patch localization	-0.45816	6.56732	0.113511	> 0.05	false	-0.36439	6.67974	0.194633	> 0.05	false	-0.484189	6.68718	0.0944535	> 0.05	false	-0.195483	6.15548	0.451498	> 0.05	false
orf19.1699	BZZ1	Protein similar to S. cerevisiae Bzz1p, which is an SH3 domain protein involved in the regulation of actin polymerization	-0.0113031	7.05932	0.969222	> 0.05	false	0.0325065	7.15377	0.906572	> 0.05	false	-0.168581	7.11405	0.549259	> 0.05	false	0.477163	6.70857	0.085985	> 0.05	false
orf19.17	SCP1	Putative cortical actin cytoskeleton protein; constitutive expression independent of MTL or white-opaque status	1.47006	4.47418	1.32864e-05	0.000114228	false	1.56417	4.61954	1.17389e-06	9.67553e-06	false	1.32798	4.5042	3.68817e-05	0.000146473	false	-0.199506	3.96686	0.516035	0.000146473	false
orf19.1700	RPS7A	Ribosomal protein S7; genes encoding cytoplasmic ribosomal subunits, translation factors, and tRNA synthetases are downregulated upon phagocytosis by murine macrophage; Spider biofilm repressed	-0.378519	9.5362	0.247821	> 0.05	false	-1.44394	9.23683	1.04678e-05	6.59728e-05	false	-0.733435	9.52352	0.029914	> 0.05	false	-0.656945	10.8797	0.016523	> 0.05	false
orf19.1701	RKI1	Ortholog(s) have ribose-5-phosphate isomerase activity, role in pentose-phosphate shunt, pyridoxine biosynthetic process and cytoplasm, nucleus localization	1.24704	6.06744	0.000125155	0.000787449	false	0.385862	5.59128	0.233618	> 0.05	false	0.164174	5.52791	0.626308	> 0.05	false	-0.0687565	5.5285	0.789653	> 0.05	false
orf19.1702	ARF3	Similar to but not orthologous to S. cerevisae Arf3; transcript filament induced; Tup1 regulated; rat catheter biofilm repressed (see Locus History Note for Assembly 19 correction)	0.0455731	6.3632	0.874705	> 0.05	false	-0.0436595	6.39079	0.879793	> 0.05	false	-0.227975	6.36132	0.425658	> 0.05	false	0.34297	6.93513	0.201111	> 0.05	false
orf19.1704	FOX3	Putative peroxisomal 3-oxoacyl CoA thiolase; transcript regulated by white-opaque switch; Spider biofilm induced	0.594437	6.65506	0.105099	> 0.05	false	0.950915	6.95305	0.0095582	0.0257511	false	0.377948	6.65963	0.31497	> 0.05	false	0.629614	5.31708	0.0130911	> 0.05	false
orf19.1706	MET18	Putative protein with a predicted role in nucleotide excision repair (NER) and RNA polymerase II (RNAP II) transcription; Plc1p-regulated	-0.167677	5.26419	0.623583	> 0.05	false	0.000785267	5.41834	1	> 0.05	false	-0.290907	5.33835	0.341416	> 0.05	false	0.0810516	5.38226	0.815704	> 0.05	false
orf19.1707		Ortholog of Candida albicans WO-1 : CAWG_02476	0.219123	1.77167	0.741068	> 0.05	false	0.090592	1.77666	0.87495	> 0.05	false	0.474883	2.04804	0.267721	> 0.05	false	-0.00837479	1.94335	1	> 0.05	false
orf19.1708		Protein of unknown function; Spider biofilm induced	2.18457	1.6522	0.000127851	0.000802743	false	2.43432	1.93524	7.26746e-06	4.73236e-05	false	3.94117	3.26699	3.36341e-17	8.65917e-16	false	-1.69659	5.20653	0.000103121	0.00140903	false
orf19.1709		Sterol carrier domain protein; alkaline downregulated; colony morphology-related gene regulation by Ssn6; Spider biofilm induced	0.398666	5.81165	0.202812	> 0.05	false	1.27931	6.44887	4.74279e-05	0.00024707	false	1.18759	6.4426	0.000388181	0.00125103	false	0.223117	5.66926	0.399615	0.00125103	false
orf19.171	DBP2	Putative DEAD-box family ATP-dependent RNA helicase; flucytosine induced; repressed in core stress response	-0.50456	6.28036	0.146714	> 0.05	false	-0.446133	6.37675	0.190535	> 0.05	false	0.885852	7.15469	0.018106	0.0370681	false	-2.57299	8.29165	2.3024e-06	6.88448e-05	true
orf19.1710	ALI1	Putative NADH-ubiquinone oxidoreductase; in detergent-resistant membrane fraction (possible lipid raft component); predicted N-terminal acetylation; nitric oxide-repressed; plasma membrane-localized; protein decreases in stationary phase	-0.0432547	7.56321	0.889735	> 0.05	false	0.0226455	7.66856	0.943243	> 0.05	false	-0.297464	7.57443	0.332151	> 0.05	false	-0.208015	7.53611	0.439407	> 0.05	false
orf19.1711	END3	Regulated by Gcn4p; induced in response to amino acid starvation (3-aminotriazole treatment)	0.120322	6.32484	0.667478	> 0.05	false	0.108633	6.39113	0.692217	> 0.05	false	-0.281353	6.25992	0.320704	> 0.05	false	0.432652	6.00542	0.0875949	> 0.05	false
orf19.1712	GEA2	Putative ARF GTP/GDP exchange factor; induced in low iron; flow model biofilm repressed	-0.10042	7.09095	0.739103	> 0.05	false	-0.0485621	7.18857	0.86303	> 0.05	false	-0.264312	7.145	0.354631	> 0.05	false	0.0808768	7.48785	0.776197	> 0.05	false
orf19.1714	PGA44	Putative GPI-anchored protein	1.58174	2.609	0.000283771	0.00159813	false	2.10303	3.0871	7.1074e-07	6.18696e-06	false	2.34163	3.32693	4.10194e-08	2.81977e-07	false	-0.800162	1.62408	0.0512676	> 0.05	false
orf19.1715	IRO1	Putative transcription factor; role in iron utilization, pathogenesis; both IRO1 and adjacent URA3 are mutated in strain CAI4; suppresses S. cerevisiae aft1 mutant low-iron growth defect; hyphal-induced; reports differ about iron regulation	-0.536861	6.83855	0.142598	> 0.05	false	-0.416028	6.96129	0.243909	> 0.05	false	-0.110693	7.1589	0.76594	> 0.05	false	-0.188812	6.64674	0.484641	> 0.05	false
orf19.1716	URA3	Orotidine-5'-phosphate decarboxylase; pyrimidine biosynthesis; gene used as genetic marker; decreased expression when integrated at ectopic chromosomal locations can cause defects in hyphal growth and virulence; Spider biofilm repressed	-0.0761933	5.33606	0.800045	> 0.05	false	0.367187	5.64207	0.198755	> 0.05	false	0.349345	5.69064	0.233452	> 0.05	false	-0.618777	6.41528	0.0199902	> 0.05	false
orf19.1717		Ortholog of C. parapsilosis CDC317 : CPAR2_502880, Candida tenuis NRRL Y-1498 : CANTEDRAFT_101483, Debaryomyces hansenii CBS767 : DEHA2A11990g and Candida dubliniensis CD36 : CD36_81270	1.47718	2.77338	0.000994006	0.00476597	false	1.6294	2.96171	0.000397771	0.00164333	false	2.29174	3.5397	1.05539e-08	8.06111e-08	false	-0.196396	3.12513	0.55023	> 0.05	false
orf19.1718	ZCF8	Predicted Zn(II)2Cys6 transcription factor; repressed by fluphenazine treatment; required for yeast cell adherence to silicone substrate	1.19698	5.85005	7.74317e-05	0.000519985	false	1.75412	6.33209	4.33186e-09	6.84475e-08	false	1.56502	6.24658	1.88794e-06	9.72856e-06	false	0.342448	5.56834	0.19643	9.72856e-06	false
orf19.1719	SGA1	Putative glucoamylase; induced in oralpharyngeal candidasis; rat catheter and Spider biofilm induced	1.08782	5.3114	0.0145346	0.0450358	false	1.79597	5.90174	5.18972e-05	0.000267275	false	1.25801	5.56073	0.00570748	0.0135003	false	0.549023	4.26881	0.0621783	0.0135003	false
orf19.172	RPC19	Putative RNA polymerases I and III subunit AC19; Hap43-induced; rat catheter biofilm induced	1.41955	3.5845	0.000268678	0.00152927	false	1.63313	3.81843	1.76786e-05	0.000103768	false	2.55488	4.60762	2.05493e-13	3.07226e-12	true	-1.32141	6.46689	2.49746e-05	0.000435944	false
orf19.1720		Ortholog(s) have role in mitotic recombination	0.466187	3.93426	0.226425	> 0.05	false	0.0687017	3.78738	0.893327	> 0.05	false	1.24396	4.56353	0.000315869	0.00103806	false	-0.30468	4.85932	0.290442	0.00103806	false
orf19.1721	NCE103	Carbonic anhydrase; converts of CO2 to bicarbonate; essential for virulence in host niches with limited CO2, normal white-opaque switch; Mnl1-induced in weak acid stress; Hap43-induced gene; F-12/CO2, rat catheter, Spider biofilm induced	2.761	5.14511	5.88508e-06	5.57411e-05	true	2.62926	5.10889	1.88337e-05	0.000109488	true	3.83759	6.24474	1.17053e-09	1.03379e-08	true	-2.36781	5.44349	2.03633e-06	6.46584e-05	true
orf19.1722		Ortholog of Candida albicans WO-1 : CAWG_02462	4.27376	-1.46061	0.0778895	> 0.05	false	3.49025	-1.76468	0.269539	> 0.05	false	5.72397	-0.60498	0.00129569	0.00364852	false	0.859806	-2.16817	1	0.00364852	false
orf19.1723		Ortholog(s) have role in response to purine-containing compound and cytoplasm, nucleus localization	-0.578214	5.8024	0.0441121	> 0.05	false	-1.37095	5.6021	2.1234e-06	1.62186e-05	false	-0.935942	5.79924	0.00131226	0.00368583	false	0.308025	4.55953	0.252525	0.00368583	false
orf19.1724		Protein of unknown function; induced by nitric oxide independent of Yhb1p	5.75537	1.30217	9.67172e-10	2.42448e-08	false	4.81895	0.589538	5.3785e-06	3.63362e-05	false	5.59927	1.29065	4.72033e-10	4.42067e-09	false	-0.534383	-1.45364	0.774495	> 0.05	false
orf19.1725		Putative adhesin-like protein	0.121398	5.22242	0.690057	> 0.05	false	0.0609997	5.26333	0.832904	> 0.05	false	0.0681419	5.32594	0.806916	> 0.05	false	0.30049	4.97376	0.296841	> 0.05	false
orf19.1727	PMC1	Vacuolar calcium P-type ATPase; transcript regulated by calcineurin and fluconazole; mutant shows increased resistance to fluconazole, lithium; increased sensitivity to calcium; Spider biofilm induced	3.32455	9.69481	1.49877e-15	1.06317e-13	true	3.38943	9.82671	8.99547e-16	4.47625e-14	true	2.81088	9.36768	1.17947e-11	1.38672e-10	true	0.355911	7.45466	0.189546	> 0.05	false
orf19.1728		Ortholog of C. parapsilosis CDC317 : CPAR2_503840, Debaryomyces hansenii CBS767 : DEHA2A09042g, Candida dubliniensis CD36 : CD36_81190 and Pichia stipitis Pignal : PICST_42519	2.47728	2.35796	1.03702e-06	1.24368e-05	false	3.00552	2.8846	3.61691e-09	5.85378e-08	false	3.22539	3.11644	8.96805e-11	9.32901e-10	false	2.37846	0.718747	0.000324334	0.00365932	false
orf19.1729		Putative transcription factor with zinc finger DNA-binding motif	-0.155106	5.47871	0.63641	> 0.05	false	0.158125	5.70815	0.60239	> 0.05	false	-0.0656265	5.65261	0.854044	> 0.05	false	-0.000228337	5.08846	1	> 0.05	false
orf19.173		C2H2 transcription factor; induced by Mnl1 under weak acid stress	0.00457253	7.05104	0.993025	> 0.05	false	-0.0434874	7.09945	0.880352	> 0.05	false	-0.184033	7.09052	0.544134	> 0.05	false	-0.0173249	5.87271	0.947606	> 0.05	false
orf19.1730		HMG-box protein; Spider biofilm repressed	-0.859669	6.72046	0.00293634	0.0118162	false	-1.05746	6.72452	0.000169447	0.000767056	false	-1.23468	6.72813	2.11432e-05	8.85014e-05	false	-0.00853342	6.0983	0.976639	8.85014e-05	false
orf19.1734		Putative ATPase and nucleosome spacing factor; heterozygous null mutant displays sensitivity to virgineone	-0.5479	7.42967	0.0693755	> 0.05	false	-0.701953	7.44104	0.0134644	0.034346	false	-0.652059	7.51914	0.032516	> 0.05	false	-0.0460094	7.38785	0.865353	> 0.05	false
orf19.1735		Ortholog(s) have U2-type spliceosomal complex localization	2.60706	1.8828	9.54981e-07	1.16144e-05	false	2.37392	1.78617	4.30994e-05	0.000227543	false	3.14928	2.46857	8.92002e-11	9.29355e-10	false	-0.53087	2.88554	0.229626	> 0.05	false
orf19.1736		Protein of unknown function; transcript detected on high-resolution tiling arrays	-0.455438	4.75521	0.194043	> 0.05	false	-1.29021	4.52494	0.00043008	0.00176045	false	-1.44145	4.54401	6.3518e-05	0.000241195	false	0.0656839	3.98382	0.83623	0.000241195	false
orf19.1737		Ortholog of Candida albicans WO-1 : CAWG_01802	3.25822	0.408827	0.000105119	0.000675924	false	2.08394	-0.331998	0.0352818	> 0.05	false	3.29565	0.57144	2.98812e-05	0.000121419	false	2.72371	-0.106126	0.00298036	0.022155	false
orf19.1738	UGP1	UTP-glucose-1-phosphaturidyl transferase; localizes to yeast, not hyphal cell surface; Hog1-repressed; stationary phase enriched; induced in oralpharyngeal candidasis; rat catheter biofilm repressed; Bcr1-repressed in RPMI a/a biofilms	-1.04678	9.85241	0.00482623	0.0180389	false	-1.46416	9.80151	9.58944e-05	0.000465035	false	-1.38436	9.88182	0.000278295	0.000925983	false	0.574546	9.36534	0.0553391	0.000925983	false
orf19.1738.1		Protein involved in microtubule morphogenesis; required for protection from excess free beta-tubulin; possibly involved the beta-tubulin folding; Spider biofilm repressed	-0.46545	5.63239	0.103188	> 0.05	false	-1.20039	5.43564	4.35795e-05	0.000229714	false	-1.09167	5.52994	0.000193815	0.000668577	false	-0.0581266	6.1429	0.821943	0.000668577	false
orf19.1741	DIT1	Ortholog(s) have catalytic activity and role in ascospore wall assembly	0	-2.15937	1	> 0.05	false	-5.12548e-15	-2.2195	1	> 0.05	false	0	-2.09868	1	> 0.05	false	0	-2.62874	1	> 0.05	false
orf19.1742	HEM3	Hydroxymethylbilane synthase; converts 4-porphobilinogen to hydroxymethylbilane in heme biosynthesis; induced in high iron, CO2; alkaline repressed; regulated by Sef1, Sfu1, and Hap43; rat catheter and Spider biofilm induced	0.74435	6.35124	0.0106585	0.0349243	false	1.08502	6.64671	0.000235852	0.00102453	false	1.23914	6.81117	4.48907e-05	0.000175664	false	0.35238	6.71062	0.199028	0.000175664	false
orf19.1743	ACS1	Acetyl-CoA synthetase; induced by human neutrophils; fluconazole-repressed; regulated by Nrg1/Mig1; colony morphology-related gene regulation by Ssn6; only in stationary phase cultures; rat catheter biofilm repressed, Spider biofilm induced	0.223984	10.4465	0.508724	> 0.05	false	0.666557	10.7743	0.070877	> 0.05	false	0.127736	10.5266	0.752945	> 0.05	false	0.797517	8.64317	0.0053485	0.0348961	false
orf19.1744	HEM4	Putative uroporphyrinogen III synthase; induced in high iron or elevated CO2; alkaline, Hap43-repressed	0.058911	4.77437	0.864061	> 0.05	false	0.160462	4.89957	0.651431	> 0.05	false	0.322373	5.04602	0.371324	> 0.05	false	-0.0781573	4.95673	0.769314	> 0.05	false
orf19.1745		Protein of unknown function; Hap43-repressed gene	0.562411	4.60347	0.0987365	> 0.05	false	0.633872	4.71995	0.0562347	> 0.05	false	0.583016	4.7474	0.0761887	> 0.05	false	0.854211	3.52306	0.00813214	0.0480927	false
orf19.1746		Protein similar to S. cerevisiae meiosis-specific, spore-wall-localized protein Ssp2p, which is required for wild-type outer spore wall formation in S. cerevisiae; possibly an essential gene (UAU1 method); Hap43p-repressed	2.22174	-1.98966	1	> 0.05	false	2.14165	-2.0511	1	> 0.05	false	2.16952	-1.93285	1	> 0.05	false	0	-2.62874	1	> 0.05	false
orf19.1747	KIP2	Putative kinesin-related motor protein involved in mitotic spindle positioning; repressed by alpha pheromone in SpiderM medium; periodic mRNA expression, peak at cell-cycle G2/M phase	-0.225598	4.9625	0.457269	> 0.05	false	-0.775989	4.80226	0.0112885	0.029588	false	-0.804772	4.85183	0.008827	0.019831	false	0.105897	6.2962	0.693359	0.019831	false
orf19.1748		Protein of unknown function; shows colony morphology-related gene regulation by Ssn6	2.48701	5.12927	8.51486e-15	5.35633e-13	true	2.12382	4.90639	2.98673e-11	7.34889e-10	true	1.33546	4.3642	6.63662e-05	0.000251294	false	1.21147	2.64328	0.000795661	0.00764477	false
orf19.175		Ortholog of C. parapsilosis CDC317 : CPAR2_802450, Candida tenuis NRRL Y-1498 : CANTEDRAFT_113969, Debaryomyces hansenii CBS767 : DEHA2A13002g and Candida dubliniensis CD36 : CD36_27430	0.295474	4.35084	0.381424	> 0.05	false	0.504046	4.54269	0.127355	> 0.05	false	0.504807	4.60113	0.103954	> 0.05	false	0.525828	4.61043	0.0528494	> 0.05	false
orf19.1750	SLR1	Protein similar to mammalian SR-like RNA splicing factor; involved in filamentous growth and virulence; gene has intron; Spider biofilm repressed	-0.0598947	8.21477	0.856832	> 0.05	false	-0.0396071	8.29727	0.904968	> 0.05	false	-0.581298	8.11372	0.0827554	> 0.05	false	0.102689	8.22439	0.705286	> 0.05	false
orf19.1751	SPT23	Protein involved in regulation of unsaturated fatty acid biosynthesis; controls the expression of the Ole1p delta-9-fatty acid desaturase	-0.688792	7.67065	0.0278752	> 0.05	false	-0.347485	7.88359	0.263785	> 0.05	false	-0.314873	7.95672	0.32044	> 0.05	false	-0.407735	7.6712	0.138473	> 0.05	false
orf19.1753	PUS7	Pseudouridine synthase; catalyzes pseudouridylation in U2 snRNA, 5S rRNA, cytoplasmic tRNAs and in pre-tRNA(Tyr); F-12/CO2 early biofilm induced	0.519629	4.90498	0.144499	> 0.05	false	0.560131	5.00159	0.105845	> 0.05	false	1.59915	5.76354	4.56609e-06	2.17787e-05	false	-1.70159	7.03801	3.09572e-06	8.60095e-05	false
orf19.1754		Putative calmodulin-dependent protein kinase; possibly an essential gene, disruptants not obtained by UAU1 method	-0.641299	7.21217	0.0274542	> 0.05	false	-0.514886	7.33519	0.0650332	> 0.05	false	-0.561386	7.375	0.0509207	> 0.05	false	0.0518591	6.39316	0.845323	> 0.05	false
orf19.1755	SET2	Ortholog(s) have histone methyltransferase activity (H3-K36 specific) activity	0.18245	5.5489	0.523382	> 0.05	false	0.640721	5.88373	0.0218337	> 0.05	false	0.728948	5.99632	0.0107569	0.0236022	false	-0.0352904	6.67066	0.897393	0.0236022	false
orf19.1756	GPD1	Glycerol-3-phosphate dehydrogenase; glycerol biosynthesis; regulated by Efg1; regulated by Tsa1, Tsa1B under H2O2 stress conditions; Sflow model and Spider biofilm induced	-2.29452	8.32533	5.95373e-07	7.75381e-06	true	-2.25714	8.4038	2.90976e-06	2.13446e-05	true	-1.84147	8.54374	5.57057e-05	0.000214461	false	-0.763819	6.95557	0.0155254	0.000214461	false
orf19.1757		Putative C2H2 transcription factor; expression upregulated in clinical isolates from HIV+ patients with oral candidiasis; Spider biofilm induced	0.301078	4.40162	0.37311	> 0.05	false	0.70044	4.70969	0.0245092	> 0.05	false	1.44941	5.27426	9.43254e-07	5.15542e-06	false	-0.232314	5.4025	0.360112	5.15542e-06	false
orf19.1759	PHO23	Ortholog(s) have methylated histone residue binding activity	0.466826	5.6273	0.116869	> 0.05	false	0.705284	5.84339	0.0148919	0.0373586	false	0.559974	5.81311	0.0533986	> 0.05	false	0.10064	5.75313	0.713324	> 0.05	false
orf19.176	OPT4	Oligopeptide transporter; detected at germ tube plasma membrane; transcript inducede during phagocytosis by macrophages; fungal-specific; Hap43-repressed; merged with orf19.2292 in Assembly 20; rat catheter and Spider biofilm induced	2.69869	5.62247	3.05146e-16	2.36594e-14	true	3.95799	6.83354	7.78458e-27	1.40291e-24	true	4.33744	7.24652	1.52301e-34	2.53886e-32	true	1.96613	4.79666	5.22048e-07	2.36328e-05	false
orf19.1760	RAS1	RAS signal transduction GTPase; regulates cAMP and MAP kinase pathways; role in hyphal induction, virulence, apoptosis, heat-shock sensitivity; nonessential; plasma membrane-localized; complements viability of S. cerevisiae ras1 ras2 mutant	0.670298	9.54335	0.0423542	> 0.05	false	0.103585	9.29487	0.754851	> 0.05	false	-0.14009	9.2323	0.675653	> 0.05	false	-0.113331	9.27257	0.679227	> 0.05	false
orf19.1761		Predicted olichyl-diphosphooligosaccharide-protein glycotransferase; role in protein N-linked glycosylation; Spider biofilm repressed	-0.0518535	5.88538	0.865288	> 0.05	false	-0.0880582	5.93976	0.761355	> 0.05	false	-0.207901	5.94153	0.477083	> 0.05	false	0.579212	6.26534	0.0261364	> 0.05	false
orf19.1762	OCA1	Putative protein phosphatase of the PTP family (tyrosine-specific); ortholog of S. cerevisiae Oca1; mutant is viable; mutant shows virulence defect	-0.0517102	4.97148	0.865862	> 0.05	false	0.0816044	5.1107	0.780437	> 0.05	false	-0.127966	5.06468	0.658049	> 0.05	false	-0.351255	5.08505	0.170185	> 0.05	false
orf19.1763	IFR1	Predicted oxidoreductase/dehydrogenase; induced by nitric oxide; rat catheter and Spider biofilm induced	2.12002	4.95021	4.03489e-09	9.05879e-08	true	2.3572	5.21127	1.66928e-07	1.69935e-06	true	2.46333	5.3588	9.06366e-10	8.12318e-09	true	1.07035	2.52674	0.00900725	> 0.05	false
orf19.1764		Protein of unknown function; rat catheter and Spider biofilm induced	0.210337	7.11236	0.452155	> 0.05	false	0.476337	7.33389	0.0906861	> 0.05	false	-0.0533463	7.10784	0.85163	> 0.05	false	-0.195578	6.37618	0.459193	> 0.05	false
orf19.1765		Secreted protein; fluconazole-induced	1.38328	5.31882	2.24487e-06	2.41432e-05	false	1.74187	5.65984	3.51716e-09	5.70618e-08	false	2.54933	6.37158	2.90424e-17	7.56463e-16	true	-0.159358	4.43687	0.568768	> 0.05	false
orf19.1766		Secreted protein; fluconazole-induced	1.83285	1.86202	0.00212226	0.00896784	false	2.11134	2.1616	0.000401753	0.00165773	false	2.92671	2.85177	2.85676e-08	2.00726e-07	false	0.726346	-0.0555219	0.32017	> 0.05	false
orf19.1767		Ortholog(s) have protein complex scaffold, ubiquitin-specific protease activity, role in histone H3-K4 methylation, histone H3-K79 methylation, histone deubiquitination and DUBm complex, SAGA complex, SLIK (SAGA-like) complex localization	1.42098	4.91782	0.000234059	0.0013595	false	1.45694	5.0189	0.000353504	0.00147231	false	2.46875	5.87166	5.13557e-14	8.43448e-13	true	0.13981	4.58086	0.670427	> 0.05	false
orf19.1768		Ortholog of C. parapsilosis CDC317 : CPAR2_407480, Candida dubliniensis CD36 : CD36_24170, Candida orthopsilosis Co 90-125 : CORT0C06830 and Spathaspora passalidarum NRRL Y-27907 : SPAPADRAFT_65786	1.62389	3.48022	4.57703e-05	0.000338355	false	1.39433	3.38613	0.00215685	0.00716585	false	2.82691	4.5893	4.27394e-15	8.02174e-14	true	0.0575403	3.32137	0.882544	> 0.05	false
orf19.1769		Ortholog(s) have G-protein beta/gamma-subunit complex binding, actin binding activity, role in positive regulation of transcription from RNA polymerase II promoter by pheromones, protein folding and cytoplasm localization	-0.397215	3.92449	0.254462	> 0.05	false	-0.385094	3.99887	0.278956	> 0.05	false	-0.526727	3.99833	0.105561	> 0.05	false	-0.22473	4.0037	0.442012	> 0.05	false
orf19.177		Has domain(s) with predicted phosphatidylinositol binding activity and role in cell communication	0.0820652	4.67858	0.821866	> 0.05	false	0.0919724	4.75521	0.793246	> 0.05	false	0.384967	4.97322	0.206589	> 0.05	false	0.00434731	5.30892	0.993974	> 0.05	false
orf19.1770	CYC1	Cytochrome c; complements defects of S. cerevisiae cyc1 cyc7 double mutant; induced in high iron; alkaline repressed; repressed by nitric oxide; Hap43-dependent repression in low iron; regulated by Sef1, Sfu1	-0.0379114	8.05934	0.910238	> 0.05	false	0.309885	8.31412	0.329569	> 0.05	false	0.341438	8.39025	0.300955	> 0.05	false	0.225767	9.02257	0.411039	> 0.05	false
orf19.1771	CWC22	Predicted spliceosome-associated protein; role in pre-mRNA splicing; Spider biofilm induced	1.80231	3.5104	1.4972e-05	0.000126371	false	1.91069	3.6722	2.22059e-06	1.68069e-05	false	2.52068	4.21491	2.33675e-12	3.01382e-11	true	-0.544267	5.22991	0.073787	> 0.05	false
orf19.1772		Ortholog(s) have mitochondrion localization	1.43451	3.13586	0.000838789	0.00410649	false	1.86953	3.53697	1.98593e-05	0.000114552	false	3.16945	4.68848	9.6611e-18	2.753e-16	true	-1.30731	6.19353	0.00197134	0.0158754	false
orf19.1773	RAP1	Transcription factor; binds telomeres and regulatory sequences in DNA; involved in telomere maintenance; represses hyphal growth under yeast-favoring conditions; similar to (but shorter than) S. cerevisiae Rap1	0.126117	6.10342	0.684471	> 0.05	false	0.116733	6.17076	0.70238	> 0.05	false	-0.422907	5.97243	0.159681	> 0.05	false	-0.39183	5.81098	0.137424	> 0.05	false
orf19.1774		Predicted dehydrogenase; transcript upregulated in an RHE model of oral candidiasis; virulence-group-correlated expression; Spider biofilm repressed	1.4436	2.27009	0.017186	> 0.05	false	1.08871	2.10449	0.0883792	> 0.05	false	1.87859	2.7201	0.00207412	0.00557222	false	1.82261	0.333549	0.00160275	0.0134768	false
orf19.1776		Putative pantetheine-phosphate adenylyltransferase (PPAT); which catalyzes 4th step in coenzyme A biosynthesis from pantothenate; rat catheter biofilm repressed	-0.060835	4.13043	0.865903	> 0.05	false	0.0777874	4.2718	0.839303	> 0.05	false	-0.365312	4.11753	0.286062	> 0.05	false	0.149216	3.68225	0.640418	> 0.05	false
orf19.1777		Ortholog(s) have ubiquitin-specific protease activity, role in endocytosis, protein deubiquitination, regulation of protein kinase activity and cell division site, cytosol, nucleus, peroxisome, transport vesicle localization	-0.789349	8.22966	0.0122872	0.0393331	false	-0.676803	8.34436	0.0294783	> 0.05	false	-1.04889	8.27073	0.00111579	0.00320004	false	0.143846	7.34491	0.59591	0.00320004	false
orf19.1778		Ortholog of Candida albicans WO-1 : CAWG_06075	4.0539	-0.128459	0.000116706	0.000741139	false	3.35369	-0.54371	0.00399533	0.0121426	false	4.15775	0.0652175	4.6102e-05	0.000179666	false	0.204506	-1.24118	1	0.000179666	false
orf19.1779	MP65	Cell surface mannoprotein; cell-wall glucan metabolism, adhesion; adhesin motif; O-glycosylation; induced by heat, germ tube formation, wall regeneration; mycelial antigen; diagnostic marker; fluconazole-repressed; Spider biofilm induced	-0.688064	10.2149	0.0408429	> 0.05	false	-0.613238	10.3166	0.0649451	> 0.05	false	-0.542751	10.4035	0.11569	> 0.05	false	-0.444462	10.379	0.125193	> 0.05	false
orf19.178		Ortholog of C. parapsilosis CDC317 : CPAR2_205480, Candida tenuis NRRL Y-1498 : CANTEDRAFT_115156, Debaryomyces hansenii CBS767 : DEHA2E22154g and Candida dubliniensis CD36 : CD36_32460	-0.0892654	4.29564	0.787416	> 0.05	false	0.00920372	4.41607	1	> 0.05	false	-0.348698	4.30364	0.315931	> 0.05	false	0.0856628	3.8996	0.774999	> 0.05	false
orf19.1780		Has domain(s) with predicted catalytic activity	1.03274	2.15536	0.0460467	> 0.05	false	0.796952	2.07865	0.124696	> 0.05	false	1.38736	2.52234	0.00231759	0.00613486	false	-0.223263	1.49733	0.628564	0.00613486	false
orf19.1782		Membrane-localized protein of unknown function	-0.559167	6.52573	0.0475747	> 0.05	false	-0.723258	6.53308	0.0100358	0.0268643	false	-0.885483	6.53279	0.00175465	0.00479206	false	0.117352	7.08954	0.671205	0.00479206	false
orf19.1782.1		Protein of unknown function; ORF added to Assembly 21 based on comparative genome analysis; has intron	0	-2.15937	1	> 0.05	false	-5.12548e-15	-2.2195	1	> 0.05	false	0	-2.09868	1	> 0.05	false	0	-2.62874	1	> 0.05	false
orf19.1783	YOR1	Protein similar to S. cerevisiae Yor1; ABC-type plasma membrane transporter involved in resistance to aureobasidin A; white cell type-specific transcript; Spider biofilm induced	-0.128616	5.97938	0.666047	> 0.05	false	-0.190026	6.02209	0.517432	> 0.05	false	0.110445	6.22998	0.723981	> 0.05	false	-0.834821	6.59949	0.0128806	> 0.05	false
orf19.1785		Protein with a PI31 proteasome regulator domain; Hap43-repressed; flow model biofilm induced	-0.57053	6.85462	0.042764	> 0.05	false	-0.516294	6.94882	0.0565394	> 0.05	false	-1.03255	6.81636	0.000459919	0.00145896	false	1.06454	5.98841	0.00013986	0.00177732	false
orf19.1789		Ortholog(s) have mitochondrion localization	-0.214062	4.36084	0.533083	> 0.05	false	0.0763594	4.57518	0.830469	> 0.05	false	0.630304	4.94604	0.0386918	> 0.05	false	-0.442005	5.10553	0.12995	> 0.05	false
orf19.1789.1	LYS1	Saccharopine dehydrogenase (biosynthetic); enzyme of alpha-aminoadipate lysine biosynthesis pathway; functionally complements S. cerevisiae lys1 mutation; fungal-specific (no human or murine homolog)	1.13256	8.96129	0.000643078	0.00325839	false	-0.317701	8.20871	0.305365	> 0.05	false	-0.796949	8.07303	0.0119464	0.0258213	false	0.0486528	7.92261	0.86827	0.0258213	false
orf19.1791		Putative protein with a predicted role in 60S ribosomal subunit biogenesis; Hap43p-induced gene; ortholog of S. cerevisiae MAK11	1.21932	3.57862	0.00242064	0.0100129	false	1.32947	3.73191	0.000636336	0.00248424	false	2.55011	4.73777	2.65799e-13	3.92112e-12	true	-1.36097	6.82345	0.000235105	0.00277958	false
orf19.1792		Ortholog(s) have ubiquitin-protein ligase activity	0.331952	5.54957	0.262645	> 0.05	false	-0.0491783	5.42085	0.865954	> 0.05	false	0.00251657	5.50575	1	> 0.05	false	0.778027	5.50186	0.00204789	0.0163341	false
orf19.1793		Ortholog(s) have phosphatidylinositol binding activity, role in cellular response to nitrogen starvation, piecemeal microautophagy of nucleus and Golgi apparatus, endosome, extrinsic to membrane, fungal-type vacuole localization	0.441518	4.64317	0.16038	> 0.05	false	0.175872	4.56774	0.581721	> 0.05	false	0.567985	4.84887	0.0574255	> 0.05	false	0.196313	4.4009	0.487497	> 0.05	false
orf19.1794		Ortholog(s) have RNA binding, translation regulator activity and role in Group I intron splicing, mitochondrial respiratory chain complex IV biogenesis, positive regulation of mitochondrial translation	0.664545	3.39338	0.0874035	> 0.05	false	0.857375	3.58754	0.0302153	> 0.05	false	1.48515	4.07929	2.20544e-05	9.17074e-05	false	0.21323	4.18456	0.469409	9.17074e-05	false
orf19.1795	PUF3	Ortholog os S. cerevisiae Puf3; mRNA-binding protein involved in RNA catabolism; mutant is viable	0.284678	5.77614	0.334094	> 0.05	false	0.680142	6.07961	0.0144428	0.0364653	false	1.02834	6.36206	0.000346271	0.00112851	false	0.105996	6.6198	0.699843	0.00112851	false
orf19.1795.1		Ortholog(s) have role in protein targeting to ER, signal peptide processing and signal peptidase complex localization	-0.847219	5.12887	0.0124319	0.0396631	false	-1.3807	5.02775	3.49018e-05	0.000188137	false	-1.85555	4.97031	3.92849e-08	2.71172e-07	false	0.21827	4.42337	0.432998	> 0.05	false
orf19.1796		Putative glyoxylate reductase; acts on glyoxylate and hydroxypyruvate substrates; Spider biofilm repressed	-0.847745	7.9527	0.00727141	0.0253057	false	-1.3585	7.86202	1.37358e-05	8.32642e-05	false	-1.99583	7.76811	1.11988e-09	9.91685e-09	false	0.638577	6.43893	0.0217277	> 0.05	false
orf19.1797		D-arabinose 5-phosphate isomerase; has GutQ domain which is associated with phosphosugar binding; other biofilm induced; rat catheter and Spider biofilm induced; F-12/CO2 early biofilm induced	1.16414	5.22404	0.00672201	0.0238037	false	1.18119	5.31002	0.00615362	0.0177016	false	1.337	5.47723	0.00175959	0.00479874	false	-0.289785	5.49377	0.341501	0.00479874	false
orf19.1798	TSC2	Putative GTPase-activating protein; similar to mammalian tuberin; involved in control of filamentous growth; mutants are viable	0.343387	5.28346	0.254626	> 0.05	false	0.487242	5.43864	0.103865	> 0.05	false	0.815354	5.69773	0.00662594	0.0154051	false	-0.0178081	5.43139	0.948575	0.0154051	false
orf19.1799	GAP5	Putative general amino acid permease; fungal-specific (no human or murine homolog)	-0.660361	7.23618	0.0265316	> 0.05	false	-0.809077	7.25221	0.0108851	0.0286886	false	-0.575395	7.40059	0.075146	> 0.05	false	-0.418731	7.26851	0.138761	> 0.05	false
orf19.18	IMH3	Inosine monophosphate (IMP) dehydrogenase; enzyme of GMP biosynthesis; target of mycophenolic acid and mizoribine monophosphate; antigenic during infection; repressed in core stress response; snoRNA snR54 encoded within IMH3 intron	-0.652176	8.27694	0.0470528	> 0.05	false	-1.10677	8.18864	0.000678156	0.00263057	false	-0.107279	8.64529	0.7564	> 0.05	false	-1.1985	10.2099	0.000126823	0.0016549	false
orf19.1800		Protein of unknown function; Spider biofilm induced	0.648972	4.88484	0.0441524	> 0.05	false	0.229737	4.71531	0.49908	> 0.05	false	0.17785	4.74579	0.60252	> 0.05	false	0.255554	4.08367	0.379352	> 0.05	false
orf19.1801	CBR1	Putative cytochrome B5 reductase; plasma membrane-localized	-0.120634	7.76121	0.70363	> 0.05	false	0.126757	7.95768	0.681769	> 0.05	false	-0.0752976	7.91421	0.816481	> 0.05	false	-0.156945	8.03132	0.561884	> 0.05	false
orf19.1802		Putative termination and polyadenylation protein; repressed by prostaglandins; Spider biofilm induced	-0.792431	7.02402	0.0729326	> 0.05	false	-0.884221	7.06321	0.0211722	> 0.05	false	-0.347234	7.33458	0.357862	> 0.05	false	-0.549916	6.94954	0.053185	> 0.05	false
orf19.1803	CDC43	Beta subunit of heterodimeric protein geranylgeranyltransferase type I; GGTase I enzyme binds zinc, is Mg-dependent; Cdc42p is GGTase I substrate	0.677808	3.61812	0.0914293	> 0.05	false	1.10248	3.96831	0.00275591	0.00884756	false	1.2267	4.11085	0.000179039	0.000624062	false	-0.322935	4.3134	0.251189	0.000624062	false
orf19.1804		Ortholog(s) have mitochondrion localization	0.311067	5.21295	0.283823	> 0.05	false	0.518236	5.40417	0.0845567	> 0.05	false	0.524086	5.46606	0.067228	> 0.05	false	-0.460539	5.79348	0.0745881	> 0.05	false
orf19.1805	PEX14	Ortholog(s) have protein binding, bridging activity, role in protein import into peroxisome matrix, docking and peroxisomal membrane localization	0.528611	6.66633	0.0752111	> 0.05	false	0.454011	6.69529	0.117197	> 0.05	false	0.15524	6.58836	0.602894	> 0.05	false	0.152335	6.17365	0.552778	> 0.05	false
orf19.1806		Ortholog of C. parapsilosis CDC317 : CPAR2_203900, Debaryomyces hansenii CBS767 : DEHA2G22374g, Candida dubliniensis CD36 : CD36_30340 and Pichia stipitis Pignal : PICST_33758	2.37015	2.22081	4.49929e-06	4.41195e-05	false	2.09113	2.08521	3.33619e-05	0.000180813	false	3.34827	3.17303	1.84256e-14	3.18296e-13	false	0.736941	1.89865	0.07007	> 0.05	false
orf19.1808	MED5	RNA polymerase II mediator complex subunit; transcription positively regulated by Tbf1p	0.24965	5.46064	0.410873	> 0.05	false	0.442535	5.64146	0.130699	> 0.05	false	0.50426	5.73588	0.0880788	> 0.05	false	0.297743	5.6354	0.27305	> 0.05	false
orf19.1813	FLC2	Protein involved in heme uptake; putative FAD transporter, similar to S. cerevisiae Flc2p	1.21121	8.441	0.000183217	0.00109963	false	1.36928	8.62595	2.32279e-05	0.000132266	false	1.242	8.59368	0.000271038	0.000904555	false	-0.195946	7.36197	0.472534	0.000904555	false
orf19.1814	STT4	Putative phosphatidylinositol-4-kinase	-0.0737845	8.55978	0.816676	> 0.05	false	-0.301337	8.5258	0.334403	> 0.05	false	-0.574582	8.46824	0.0749277	> 0.05	false	0.378363	7.87849	0.160192	> 0.05	false
orf19.1815		Ortholog of S. cerevisae/S. pombe Tif6; constituent of 66S pre-ribosomal particles; Spider biofilm induced	0.594464	7.01933	0.0396595	> 0.05	false	0.331536	6.93937	0.239845	> 0.05	false	1.03908	7.43433	0.000972512	0.00281821	false	-1.1289	8.15269	0.000646887	0.00646693	false
orf19.1816	ALS3	Cell wall adhesin; epithelial adhesion, endothelial invasion; alleles vary in adhesiveness; immunoprotective in mice; binds SspB adhesin of S. gordonii in mixed biofilm; induced in/required for Spider biofilm; flow model biofilm repressed	1.55776	7.67447	3.72905e-06	3.75042e-05	false	3.04959	8.9806	1.21819e-18	9.33668e-17	true	4.51604	10.4016	8.36083e-30	9.29167e-28	true	-0.372369	9.12169	0.339969	> 0.05	false
orf19.182		Ortholog(s) have rRNA (guanine-N1-)-methyltransferase activity, role in rRNA modification and endoplasmic reticulum, mitochondrion localization	-0.108605	4.61863	0.741866	> 0.05	false	0.200167	4.84845	0.50672	> 0.05	false	1.05929	5.42917	0.000232129	0.000788102	false	-0.877358	6.05741	0.000811403	0.00776246	false
orf19.1821		Protein of unknown function; repressed by alpha pheromone in SpiderM medium	7.23481	0.432863	1.07707e-07	1.7646e-06	false	7.55903	0.696277	1.02785e-07	1.11989e-06	false	8.70959	1.8007	9.12806e-16	1.88439e-14	false	2.35784	-1.23132	0.0404282	> 0.05	false
orf19.1822	UME6	Zn(II)2Cys6 transcription factor; role in hyphal extension, virulence, adherence to plastic; filament induced; regulated by Nrg1/Tup1/Rfg1, alkaline conditions; expression promotes highly filamentous biofilms; rat catheter biofilm induced	4.64433	4.79402	3.72361e-25	1.10124e-22	true	4.75499	4.97679	8.24042e-25	1.27784e-22	true	6.03638	6.26074	5.29276e-51	5.04173e-48	true	0.881191	3.47513	0.00460026	0.0314289	false
orf19.1823		Predicted membrane protein; transcript repressed by ciclopirox olamine	-0.244432	4.88006	0.473364	> 0.05	false	-0.712311	4.75117	0.0424636	> 0.05	false	0.348503	5.31515	0.313238	> 0.05	false	0.195701	5.10298	0.454916	> 0.05	false
orf19.1824	PGA50	Putative GPI-anchored protein; adhesin-like protein	4.88231	0.516551	3.01379e-07	4.3032e-06	false	4.64312	0.40231	1.35202e-06	1.0888e-05	false	5.92884	1.53567	1.23426e-11	1.4464e-10	false	4.08726	-0.75023	0.000492234	0.00509661	false
orf19.1825		Protein of unknown function; mutants are viable; filament induced; regulated by Nrg1, Rfg1, Tup1	-0.423148	1.92105	0.373133	> 0.05	false	-0.432918	1.97626	0.346665	> 0.05	false	0.615303	2.58557	0.134796	> 0.05	false	0.0986254	3.17214	0.780356	> 0.05	false
orf19.1826	MDM34	Putative zinc finger transcription factor; macrophage-downregulated; flow model biofilm induced; flow model and Spider biofilm induced	2.06248	5.03251	7.04881e-05	0.000481572	true	2.89098	5.80231	1.88184e-08	2.49962e-07	true	2.94551	5.90665	1.21182e-08	9.15108e-08	true	0.129413	5.00951	0.626231	> 0.05	false
orf19.1827		Protein of unknown function; flow model biofilm induced; induced by alpha pheromone in SpiderM medium	1.51014	0.94446	0.0499376	> 0.05	false	1.98252	1.36754	0.00662347	0.0188419	false	2.59777	1.86181	4.21864e-06	2.03545e-05	false	0.379195	-0.377938	0.662097	2.03545e-05	false
orf19.1828	BUD16	Putative pyridoxal kinase; a key enzyme in pyridoxal 5'-phosphate synthesis, the active form of vitamin B6; involved in bud-site selection and genome integrity in S. cerevisiae; induced by alpha pheromone in SpiderM medium	0.243899	4.05575	0.534297	> 0.05	false	0.510722	4.27874	0.197827	> 0.05	false	0.528521	4.34839	0.165937	> 0.05	false	-0.15454	4.61376	0.562645	> 0.05	false
orf19.183	HIS3	Imidazoleglycerol-phosphate dehydratase, enzyme of histidine biosynthesis; functionally complements S. cerevisiae his3-1 mutation; hyphal-induced expression; regulated by Gcn2p and Gcn4p; fungal-specific (no human or murine homolog)	2.18372	5.10095	1.31572e-11	4.74226e-10	true	1.77123	4.852	1.47536e-07	1.52759e-06	false	1.84705	4.96515	6.85219e-09	5.39438e-08	false	-0.289605	4.88782	0.260207	> 0.05	false
orf19.1830		Protein of unknown function; Hap43-induced; rat catheter and Spider biofilm induced	2.0802	4.75797	3.23066e-05	0.000252545	true	2.8412	5.47002	1.4156e-08	1.96242e-07	true	2.92538	5.59962	7.54894e-09	5.90802e-08	true	-1.06788	3.62809	0.0029863	0.0221745	false
orf19.1831		Ortholog of Candida albicans WO-1 : CAWG_00374	6.34767	-0.264442	3.19945e-05	0.000250398	false	6.87016	0.130058	1.57798e-06	1.24964e-05	false	7.75192	0.93285	1.27335e-08	9.57238e-08	false	-2.3183	-2.45805	1	> 0.05	false
orf19.1832	FCY23	Putative transporter; Gcn4p-regulated; more similar to S. cerevisiae Tpn1p, which is a vitamin B6 transporter, than to purine-cytosine permeases	0.59137	6.95238	0.0458853	> 0.05	false	0.419491	6.92406	0.125312	> 0.05	false	0.244448	6.88493	0.389667	> 0.05	false	-0.178469	6.84162	0.515034	> 0.05	false
orf19.1833		Ortholog(s) have pseudouridine synthase activity, role in box H/ACA snoRNA 3'-end processing, rRNA pseudouridine synthesis, snRNA pseudouridine synthesis and 90S preribosome, box H/ACA snoRNP complex, cytosol localization	0.29222	6.99038	0.400223	> 0.05	false	-0.512042	6.67395	0.135143	> 0.05	false	0.57608	7.28507	0.104332	> 0.05	false	-1.35693	8.97753	8.83802e-05	0.00125923	false
orf19.1834		Ortholog of C. parapsilosis CDC317 : CPAR2_212580, Debaryomyces hansenii CBS767 : DEHA2G11770g, Candida dubliniensis CD36 : CD36_09960 and Pichia stipitis Pignal : PICST_51041	-0.381332	4.39945	0.266463	> 0.05	false	-0.481714	4.42579	0.169332	> 0.05	false	0.0398361	4.72989	0.897506	> 0.05	false	0.2986	5.33368	0.280246	> 0.05	false
orf19.1835	PEA2	Putative coiled-coil polarisome; predicted role in polarized morphogenesis, cell fusion, and low affinity Ca2+ influx; rat catheter biofilm induced	0.596273	4.3529	0.0741144	> 0.05	false	1.15319	4.78708	0.000227056	0.000989548	false	1.80022	5.31822	1.23835e-09	1.08792e-08	false	0.210578	6.16253	0.45791	> 0.05	false
orf19.1836	APN2	Putative class II abasic (AP) endonuclease; flucytosine induced	0.238	3.57575	0.544828	> 0.05	false	0.263298	3.66104	0.504288	> 0.05	false	0.847975	4.06871	0.017009	0.0351568	false	0.0212422	4.96704	0.944692	0.0351568	false
orf19.1837	TBP1	Transcription initiation factor; binds TATA box sequence, binding does not require TFIIA; caspofungin repressed; functional homolog of S. cerevisiae and human TATA-binding proteins; Spider biofilm induced	-0.840141	6.62898	0.00333752	0.0131451	false	-0.512419	6.82759	0.0673585	> 0.05	false	-0.239731	7.00558	0.431187	> 0.05	false	0.464589	7.08276	0.0963777	> 0.05	false
orf19.1839	RPA190	Putative RNA polymerase I subunit A190; Hap43p-induced gene; flucytosine induced	1.12188	5.67027	0.00149481	0.00668056	false	1.33869	5.89482	6.42786e-05	0.000322263	false	2.62081	6.96854	1.8064e-13	2.73752e-12	true	-1.60632	9.16266	5.97587e-06	0.000140802	false
orf19.184	MDM10	Predicted component of the mitochondrial sorting and assembly machinery (SAM complex) and ER-mitochondria encounter structure (ERMES) complex with a role in protein import into mitochondria	0.57755	4.93168	0.0506791	> 0.05	false	0.598359	5.01728	0.0444434	> 0.05	false	0.481567	5.00591	0.0954407	> 0.05	false	0.0504503	5.22614	0.844069	> 0.05	false
orf19.1840		Predicted lipid-binding ER protein; involved in ER-plasma membrane tethering; Spider biofilm induced	-0.717853	8.70897	0.0269552	> 0.05	false	-0.996	8.68228	0.00183995	0.00625322	false	-0.872139	8.78358	0.00852611	0.019285	false	-0.173481	8.63172	0.522979	0.019285	false
orf19.1841		Protein of unknown function; Hap43-induced gene	0.256189	2.22264	0.558294	> 0.05	false	0.384904	2.365	0.444301	> 0.05	false	0.893882	2.73047	0.0273281	> 0.05	false	0.476119	2.75273	0.205653	> 0.05	false
orf19.1842	BUD5	Predicted GTP/GDP exchange factor for Rsr1; rat catheter biofilm induced	-0.672603	5.85293	0.0214153	> 0.05	false	0.0774371	6.2634	0.79005	> 0.05	false	0.607134	6.61885	0.0392553	> 0.05	false	0.431314	6.08325	0.109722	> 0.05	false
orf19.1843	ALG6	Putative glucosyltransferase involved in cell wall mannan biosynthesis; transcription is elevated in chk1, nik1, and sln1 homozygous null mutants; repressed by nitric oxide; possibly essential gene, disruptants not obtained by UAU1 method	-0.642589	5.9616	0.0306161	> 0.05	false	-0.845194	5.95662	0.00317421	0.00992503	false	-0.908736	5.99362	0.00180157	0.00490721	false	0.260378	5.53027	0.305776	0.00490721	false
orf19.1844		Protein similar to ferric reductase Fre10p	4.23613	2.88389	1.63486e-15	1.13555e-13	false	4.24102	2.9755	5.41468e-15	2.49001e-13	false	4.64923	3.3926	7.52158e-19	2.50769e-17	false	3.06765	0.762981	1.06249e-07	6.68366e-06	false
orf19.1847	ARO10	Aromatic decarboxylase; Ehrlich fusel oil pathway of aromatic alcohol biosynthesis; alkaline repressed; protein abundance affected by URA3 expression in CAI-4 strain; Spider biofilm induced	-1.44903	5.89415	1.63682e-06	1.83434e-05	false	-1.4033	5.97719	1.86428e-06	1.44044e-05	false	-0.810554	6.22673	0.00645545	0.0150614	false	0.408336	7.04174	0.133468	0.0150614	false
orf19.1848.1		Ortholog of S. cerevisiae : KSH1, C. parapsilosis CDC317 : CPAR2_203260, Candida tenuis NRRL Y-1498 : CANTEDRAFT_116778 and Debaryomyces hansenii CBS767 : DEHA2A10604g	-0.456209	4.23067	0.174415	> 0.05	false	-0.86149	4.13828	0.0132431	0.0338853	false	-1.09829	4.11707	0.000987615	0.00285775	false	0.168546	4.36047	0.580114	0.00285775	false
orf19.1849		Ortholog(s) have U3 snoRNA binding, rRNA binding activity, role in maturation of SSU-rRNA from tricistronic rRNA transcript (SSU-rRNA, 5.8S rRNA, LSU-rRNA) and nucleolus, small-subunit processome localization	0.302724	5.08041	0.2931	> 0.05	false	0.522372	5.27887	0.0677126	> 0.05	false	0.770585	5.48868	0.00723895	0.0166676	false	-0.83032	6.32105	0.00811189	0.0480801	false
orf19.185		Ortholog(s) have structural constituent of ribosome activity, role in mitochondrial translational initiation and mitochondrial small ribosomal subunit localization	-0.582175	5.75352	0.0418382	> 0.05	false	-0.284081	5.9528	0.310417	> 0.05	false	0.0871485	6.19181	0.763686	> 0.05	false	-0.39588	6.82874	0.150129	> 0.05	false
orf19.1850	SIW14	Putative protein phosphatase of the PTP family (tyrosine-specific), similar to S. cerevisiae Siw14p; mutant shows virulence defect; Hap43p-repressed gene	-0.00902279	5.47712	0.989727	> 0.05	false	0.151602	5.63199	0.59641	> 0.05	false	-0.346789	5.44848	0.246731	> 0.05	false	0.157057	5.27237	0.531802	> 0.05	false
orf19.1852		Ortholog(s) have mitochondrion localization	-1.00627	5.53093	0.000429264	0.0022753	false	-1.59559	5.42777	5.33558e-08	6.29693e-07	false	-2.16951	5.36266	8.55169e-13	1.16373e-11	true	0.483908	4.37269	0.0993962	> 0.05	false
orf19.1853	HHT2	Putative histone H3; farnesol regulated; Hap43-induced; rat catheter and Spider biofilm repressed	-0.822236	8.02095	0.0379284	> 0.05	false	-1.98264	7.77015	7.46192e-07	6.44509e-06	false	-2.20378	7.78686	1.7639e-07	1.08498e-06	true	-0.380727	8.87019	0.161122	> 0.05	false
orf19.1854	HHF22	Putative histone H4; regulated by Efg1; flucytosine, fluconazole-induced; amphotericin B, caspofungin repressed; colony morphology-related gene regulation by Ssn6; Hap43-induced; rat catheter and Spider biofilm repressed	-0.0405686	8.03769	0.907528	> 0.05	false	-1.11649	7.67596	0.00135825	0.00477931	false	-1.65908	7.58374	3.66345e-06	1.78436e-05	false	-0.0942728	8.95215	0.728904	1.78436e-05	false
orf19.1855		Predicted membrane transporter, member of the anion:cation symporter (ACS) family, major facilitator superfamily (MFS); Gcn4p-regulated; flucytosine induced; ketoconazole-repressed; oxidative stress-induced via Cap1p	0.635041	4.20047	0.0777816	> 0.05	false	0.208372	4.02751	0.599272	> 0.05	false	0.166805	4.06265	0.656574	> 0.05	false	-0.844362	3.42148	0.0152848	> 0.05	false
orf19.1856		Ortholog(s) have histone deacetylase activity	-0.0402763	4.99353	0.890633	> 0.05	false	0.156313	5.16649	0.605552	> 0.05	false	-0.000483503	5.14385	0.992931	> 0.05	false	-0.19932	5.13332	0.426684	> 0.05	false
orf19.1857		Putative L-azetidine-2-carboxylic acid acetyltransferase; mutants are viable	-0.394141	5.90197	0.198781	> 0.05	false	-1.68713	5.54242	1.35613e-08	1.89574e-07	false	-1.87401	5.55986	8.75824e-10	7.87061e-09	false	0.162728	5.26175	0.524459	> 0.05	false
orf19.1860	LSC2	Putative succinate-CoA ligase beta subunit; regulated by Mig1, Tup1; induced in high iron; protein present in exponential and stationary growth phase yeast cells; Spider biofilm repressed	-0.923047	10.0313	0.00642517	0.0229968	false	-1.95358	9.82378	1.18885e-08	1.703e-07	false	-1.57692	9.96824	5.46832e-06	2.56961e-05	false	-6.83506e-05	9.86204	1	2.56961e-05	false
orf19.1860.1		Has domain(s) with predicted aminopeptidase activity and role in proteolysis	-0.572523	6.90333	0.0419121	> 0.05	false	-0.619349	6.95666	0.0213464	> 0.05	false	-0.927153	6.90145	0.00115023	0.0032861	false	0.44032	6.86436	0.125562	0.0032861	false
orf19.1861		Protein of unknown function; flow model biofilm induced	0.0923357	6.67155	0.770688	> 0.05	false	-0.481341	6.47476	0.104212	> 0.05	false	-0.818004	6.40181	0.00676896	0.0157211	false	0.099391	5.27366	0.702706	0.0157211	false
orf19.1862		Possible stress protein; increased transcription associated with CDR1 and CDR2 overexpression or fluphenazine treatment; regulated by Sfu1, Nrg1, Tup1; stationary phase enriched protein; Spider biofilm induced	-2.86024	9.51999	3.80006e-16	2.9125e-14	true	-3.26021	9.54937	7.01616e-20	6.40874e-18	true	-4.41976	9.53065	2.14014e-30	2.5483e-28	true	1.34775	7.05984	9.44619e-06	0.000203527	false
orf19.1863		Has domain(s) with predicted Rho guanyl-nucleotide exchange factor activity, role in regulation of Rho protein signal transduction and intracellular localization	-0.370878	1.57452	0.490836	> 0.05	false	0.0876231	1.85257	0.840813	> 0.05	false	0.348138	2.05539	0.431165	> 0.05	false	1.76519	0.66256	0.000838437	0.00795263	false
orf19.1864		Ortholog(s) have cytosol localization	-1.04156	7.43711	0.000869199	0.00424291	false	-0.87798	7.56492	0.00374708	0.0114929	false	-1.24875	7.50321	6.31807e-05	0.0002401	false	-0.178623	6.6021	0.503078	0.0002401	false
orf19.1865	MCS7	S. cerevisiae ortholog Mcs7 has a role in reciprocal meiotic recombination; Spider biofilm repressed	-0.637524	6.99889	0.023429	> 0.05	false	-0.399252	7.16929	0.153004	> 0.05	false	-0.181086	7.32642	0.528289	> 0.05	false	-0.327528	7.31762	0.220989	> 0.05	false
orf19.1866	VMA10	Subunit G of the V1 peripheral membrane domain of the vacuolar H+-ATPase (V-ATPase); involved in vacuolar acidification; rat catheter biofilm repressed	-0.250522	7.78551	0.44114	> 0.05	false	-0.216251	7.87372	0.498495	> 0.05	false	-0.625254	7.75717	0.0594421	> 0.05	false	0.128241	7.52581	0.644856	> 0.05	false
orf19.1867		Putative malate permease; induced during macrophage infection; regulated by Gcn2 and Gcn4; putative peroxisome targeting signal; Hap43-repressed; Spider biofilm induced	1.35679	3.66919	0.00179473	0.00780134	false	1.30415	3.71079	0.000663008	0.00257931	false	1.22029	3.70901	0.000599849	0.00183561	false	0.605961	2.70718	0.116777	0.00183561	false
orf19.1868	RNR22	Putative ribonucleoside diphosphate reductase;colony morphology-related gene regulation by Ssn6; transcript regulated by tyrosol and cell density; Hap43-repressed; Spider biofilm induced	-3.54862	9.97015	2.21557e-10	6.53691e-09	true	-4.74424	9.97708	9.73827e-18	6.6943e-16	true	-5.33871	10.0181	1.44621e-21	7.30556e-20	true	0.906609	7.52004	0.00161195	0.0135372	false
orf19.1871		Ortholog(s) have structural molecule activity, role in histone exchange and Swr1 complex localization	1.25756	7.57843	0.000107675	0.000688377	false	1.65998	7.94604	1.46233e-07	1.51646e-06	false	2.44888	8.63865	5.45805e-12	6.67784e-11	true	1.59262	8.23256	3.78417e-06	9.97346e-05	false
orf19.1872		Plasma membrane protein; repressed by nitric oxide	-0.492851	8.47141	0.117171	> 0.05	false	-0.353025	8.60368	0.257936	> 0.05	false	-0.603221	8.55761	0.0609469	> 0.05	false	-0.203272	8.31388	0.453641	> 0.05	false
orf19.1873		Protein of unknown function; Hap43-repressed gene; repressed by nitric oxide	-0.0941786	7.13959	0.74692	> 0.05	false	0.0874845	7.30292	0.757189	> 0.05	false	-0.137639	7.2497	0.628589	> 0.05	false	-0.0788704	7.01569	0.769216	> 0.05	false
orf19.1874		Ortholog(s) have protein serine/threonine kinase activity, role in meiotic recombination checkpoint, protein phosphorylation, regulation of linear element assembly and cytosol, linear element localization	2.52847	0.591041	0.000125101	0.000787449	false	2.59575	0.720562	0.000239792	0.00103894	false	4.02161	1.93489	2.78991e-10	2.6922e-09	false	2.4147	-0.535013	0.00303102	0.0224243	false
orf19.1876		Ortholog(s) have mRNA binding activity, role in mRNA splice site selection, positive regulation of mRNA splicing, via spliceosome and U1 snRNP, U2-type prespliceosome, commitment complex localization	-0.321622	5.26692	0.30514	> 0.05	false	-0.151163	5.41726	0.625537	> 0.05	false	-0.147584	5.47783	0.636735	> 0.05	false	-0.219626	5.49091	0.383036	> 0.05	false
orf19.1877		Ortholog(s) have cytoplasm, nucleus localization	0.190724	4.53802	0.556396	> 0.05	false	-0.0413551	4.48948	0.921375	> 0.05	false	-0.377552	4.39193	0.264514	> 0.05	false	0.288474	4.19523	0.324541	> 0.05	false
orf19.1878	MED4	RNA polymerase II core mediator complex subunit	-0.0657016	5.23479	0.834261	> 0.05	false	-0.170191	5.2559	0.574322	> 0.05	false	-0.398885	5.21117	0.166215	> 0.05	false	-0.141271	4.97904	0.58065	> 0.05	false
orf19.188		Ortholog of Candida albicans WO-1 : CAWG_04234	-0.249327	6.47915	0.378921	> 0.05	false	0.0936361	6.7188	0.741876	> 0.05	false	0.105231	6.78348	0.716832	> 0.05	false	-0.0972965	7.06256	0.726297	> 0.05	false
orf19.1880	HEM15	Putative ferrochelatase involved in heme biosynthesis; transcript not regulated by iron levels and not affected by a yfh1 null mutation; Spider biofilm repressed	-1.27836	8.73478	7.73186e-05	0.000519985	false	-1.63898	8.71064	3.50583e-07	3.25584e-06	false	-2.09247	8.6714	4.62287e-10	4.33549e-09	true	-0.0293825	8.10095	0.914473	> 0.05	false
orf19.1881		Putative broad-specificity lysophospholipid acyltransferase; role in glycerophospholipid biosynthesis; rat catheter biofilm repressed	-0.464101	7.51497	0.125538	> 0.05	false	-0.543498	7.55432	0.0627866	> 0.05	false	-0.899388	7.47835	0.00234744	0.0061991	false	0.125464	6.92251	0.647721	0.0061991	false
orf19.1883	YCS4	Putative condensin complex subunit; cell-cycle regulated periodic mRNA expression	-0.193527	6.55889	0.50216	> 0.05	false	-0.530291	6.48274	0.0647439	> 0.05	false	-0.4254	6.58587	0.144222	> 0.05	false	-0.0480332	6.80574	0.864481	> 0.05	false
orf19.1885	TAF4	Putative TFIID subunit; mutation confers hypersensitivity to toxic ergosterol analog	-0.724919	6.29355	0.0111808	0.0363143	false	-0.684523	6.38063	0.0147298	0.0370496	false	-0.788561	6.40033	0.00626993	0.0146643	false	0.0980412	5.70571	0.70651	0.0146643	false
orf19.1886	RCL1	Putative U3-containing 90S preribosome processome complex subunit; Hap43-induced; essential; S. cerevisiae ortholog is essential; represses in core stress response;	1.54177	4.17012	1.61259e-05	0.000135085	false	1.64614	4.32387	2.30503e-06	1.73672e-05	false	2.70165	5.23086	2.08429e-17	5.58154e-16	true	-1.70496	6.92617	3.00618e-06	8.45789e-05	false
orf19.1887		Ortholog(s) have sterol esterase activity, role in sterol metabolic process and integral to membrane, lipid particle localization	-1.56092	5.3624	1.52013e-07	2.39063e-06	false	-2.01334	5.32785	3.89998e-11	9.32082e-10	true	-1.55922	5.49298	1.5824e-07	9.84279e-07	false	0.273853	4.60366	0.323916	> 0.05	false
orf19.1888		Putative nicotinamide riboside hydrolase; cleaves N-glycosidic bonds in nucleosides; pyrimidine salvage and nicotinamide riboside salvage pathways; Spider biofilm induced	-0.697548	5.06383	0.0157405	0.0480794	false	-0.603275	5.1714	0.0370355	> 0.05	false	-0.755026	5.17205	0.00713695	0.0164554	false	0.225101	4.42825	0.428642	0.0164554	false
orf19.1889		Putative phosphoglycerate mutase family protein; stationary phase enriched protein; early-stage flow model biofilm induced; Spider biofilm repressed	-1.27406	7.60488	0.00109194	0.00515291	false	-1.61914	7.58399	3.19817e-05	0.000174227	false	-1.80645	7.59912	4.96837e-06	2.35125e-05	false	0.0463147	7.41787	0.864101	2.35125e-05	false
orf19.1890		Ortholog(s) have role in medium-chain fatty acid biosynthetic process	0.521496	5.02062	0.131735	> 0.05	false	0.558769	5.11553	0.102151	> 0.05	false	0.249897	4.99655	0.469757	> 0.05	false	-0.747966	4.78441	0.0155454	> 0.05	false
orf19.1891	APR1	Vacuolar aspartic proteinase; transcript equivalent in yeast-form and mycelial cells but is elevated at lower growth temperatures; upregulated iby human neutrophils; protein enriched in stationary phase; Spider biofilm induced	-0.617552	9.93482	0.0688195	> 0.05	false	-0.411675	10.0922	0.214167	> 0.05	false	-0.820047	9.98938	0.0173027	0.0356754	false	0.574376	8.98403	0.058286	0.0356754	false
orf19.1893		Protein of unknown function; Spider biofilm repressed	-0.0874443	6.86856	0.757803	> 0.05	false	-0.601024	6.71351	0.031196	> 0.05	false	-1.23136	6.55244	1.95231e-05	8.20291e-05	false	0.105254	5.91646	0.703763	8.20291e-05	false
orf19.1896	SSC1	Heat shock protein; at yeast-form cell surface, not hyphae; antigenic; Gcn4-regulated; induced by amino acid starvation (3-AT) or by adherence to polystyrene; macrophage-repressed; sumoylation target; possibly essential	-1.26799	9.82197	0.000821477	0.00403062	false	-1.11871	9.93993	0.00198102	0.00668154	false	-0.965955	10.0485	0.00902535	0.0202493	false	0.0650568	10.7282	0.809187	0.0202493	false
orf19.1897		Ortholog of C. parapsilosis CDC317 : CPAR2_105040, Candida tenuis NRRL Y-1498 : CANTEDRAFT_112352, Debaryomyces hansenii CBS767 : DEHA2C08008g and Candida dubliniensis CD36 : CD36_21640	-0.0989856	5.6707	0.727738	> 0.05	false	-0.281268	5.65674	0.328569	> 0.05	false	-0.649661	5.55965	0.0289002	> 0.05	false	-0.130739	5.73437	0.617263	> 0.05	false
orf19.190		Ortholog(s) have role in endoplasmic reticulum organization, histone exchange and Swr1 complex, mitochondrion localization	-0.285892	4.67978	0.362579	> 0.05	false	-0.0479696	4.86414	0.876861	> 0.05	false	0.397127	5.16067	0.174956	> 0.05	false	-0.0140852	5.25848	0.959841	> 0.05	false
orf19.1900		Ortholog(s) have RNA methyltransferase activity, role in 7-methylguanosine cap hypermethylation, meiosis, nucleologenesis, regulation of telomere maintenance via telomerase and nucleolus localization	0.878824	4.92705	0.00287252	0.0116155	false	0.971202	5.06127	0.000969741	0.00359435	false	1.74959	5.67627	5.26033e-09	4.21585e-08	false	-0.528598	5.70736	0.043299	> 0.05	false
orf19.1901	MCM3	Putative DNA replication protein; periodic mRNA expression, peak at cell-cycle M/G1 phase; Spider biofilm induced	-0.460588	5.99208	0.117123	> 0.05	false	-0.457474	6.065	0.114492	> 0.05	false	0.0550364	6.3638	0.859151	> 0.05	false	-0.472862	7.11585	0.0834348	> 0.05	false
orf19.1902	NOC4	Putative nucleolar protein; Hap43-induced; mutation confers resistance to 5-fluorocytosine (5-FC), 5-fluorouracil (5-FU), and tubercidin (7-deazaadenosine); Spider biofilm induced	1.2976	3.70482	0.00121975	0.00562935	false	1.80882	4.15723	1.47547e-06	1.17967e-05	false	2.91016	5.1176	1.8982e-16	4.45675e-15	true	-1.94686	6.98429	4.43587e-06	0.000111617	false
orf19.1906		Protein of unknown function; flow model biofilm induced	-0.563597	0.51364	0.429343	> 0.05	false	-0.189018	0.712562	0.847021	> 0.05	false	0.32562	1.03768	0.590135	> 0.05	false	-0.915864	1.13595	0.040593	> 0.05	false
orf19.1907	EMC9	Ortholog of S. cerevisiae Nnf2; possible role in chromosome segregation; mutants are viable, induced during the mating process	-0.895919	6.80704	0.00156889	0.00696496	false	-0.97741	6.8507	0.000460078	0.00186833	false	-1.01034	6.89855	0.000579045	0.00178011	false	-0.053908	6.79644	0.842179	0.00178011	false
orf19.191	KIC1	Member of the GCK-III subfamily of eukaryotic Ste20p kinases; in RAM cell wall integrity signaling network; role in cell separation, azole sensitivity; required for hyphal growth; constitutive expression is MTL, white-opaque independent	-0.30422	7.12643	0.312097	> 0.05	false	-0.295993	7.20235	0.309327	> 0.05	false	-0.623813	7.12256	0.0330148	> 0.05	false	-0.0103133	6.26848	0.971265	> 0.05	false
orf19.1910		Predicted NADH-dependent flavin oxidoreductase; Hap43-repressed gene	-0.120911	5.30574	0.787249	> 0.05	false	-0.307413	5.2908	0.481388	> 0.05	false	-0.448277	5.28915	0.300111	> 0.05	false	-0.0768579	4.113	0.796166	> 0.05	false
orf19.1911	PGA52	GPI-anchored cell surface protein of unknown function; Hap43p-repressed gene; fluconazole-induced; possibly an essential gene, disruptants not obtained by UAU1 method	-2.10764	9.48286	0.0082361	0.0280572	true	-1.90559	9.59551	0.0166121	0.0411323	false	-1.96359	9.64217	0.0135729	0.0288966	false	-0.268241	7.06744	0.333806	0.0288966	false
orf19.1913		Protein of unknown function; flow model biofilm induced	-0.13353	3.79525	0.734748	> 0.05	false	0.00207753	3.93252	1	> 0.05	false	-0.196764	3.89587	0.566668	> 0.05	false	-0.279488	4.16192	0.327991	> 0.05	false
orf19.1914	FAV3	Putative alpha-1,6-mannanase; induced by mating factor in MTLa/MTLa opaque cells	0.78647	4.54685	0.0224	> 0.05	false	0.813529	4.63848	0.0104817	0.027812	false	0.78566	4.67886	0.0103954	0.0229222	false	-0.56391	4.479	0.0523636	0.0229222	false
orf19.1915	MPP10	Putative SSU processome and 90S preribosome component; repressed in core stress response; repressed by prostaglandins	1.82305	4.46863	4.54886e-06	4.44793e-05	false	1.9955	4.67879	3.24587e-07	3.05699e-06	false	3.08111	5.6472	1.78918e-15	3.52965e-14	true	-1.80423	7.50641	1.96662e-06	6.39679e-05	false
orf19.1917		Protein of unknown function; Spider biofilm repressed	-0.45654	7.90381	0.141609	> 0.05	false	-0.493124	7.96084	0.109429	> 0.05	false	-0.904121	7.86244	0.00487643	0.0118111	false	0.14777	7.92726	0.593706	0.0118111	false
orf19.192		Ortholog of C. parapsilosis CDC317 : CPAR2_209670, Candida tenuis NRRL Y-1498 : CANTEDRAFT_113478, Debaryomyces hansenii CBS767 : DEHA2C15136g and Candida dubliniensis CD36 : CD36_19320	0.542315	3.63655	0.153228	> 0.05	false	0.674945	3.79046	0.073204	> 0.05	false	0.553201	3.77312	0.107645	> 0.05	false	-0.44949	3.92521	0.123502	> 0.05	false
orf19.1920		Ortholog of Candida dubliniensis CD36 : CD36_15040	-0.20517	-1.36266	1	> 0.05	false	-0.936271	-1.52508	1	> 0.05	false	1.29987	-0.729264	0.268674	> 0.05	false	-2.3133	-2.45956	1	> 0.05	false
orf19.1923	RRN3	Protein with a predicted role in recruitment of RNA polymerase I to rDNA; caspofungin induced; flucytosine repressed; repressed in core stress response; repressed by prostaglandins	0.74802	3.74683	0.0803473	> 0.05	false	1.45762	4.30078	5.40438e-05	0.000276565	false	2.33732	5.0398	2.36951e-12	3.05018e-11	true	-1.18054	6.79052	0.00114657	0.0102621	false
orf19.1925	TLO5	Member of a family of telomere-proximal genes of unknown function; may be spliced in vivo	-0.285713	4.3927	0.411233	> 0.05	false	-0.489352	4.37331	0.155955	> 0.05	false	-0.942234	4.2594	0.00595852	0.0140294	false	0.610763	4.65464	0.0259571	0.0140294	false
orf19.1926	SEF2	Zn(II)2Cys6 transcription factor, required for normal resistance to copper; repressed by Sfu1 in high-iron conditions; regulated by Sef1, Sfu1, and Hap43; rat catheter and Spider biofilm induced	0.150033	5.14684	0.73433	> 0.05	false	0.449788	5.3839	0.317257	> 0.05	false	0.435285	5.4323	0.355045	> 0.05	false	1.29406	5.2024	0.000337982	0.00376866	false
orf19.1927	SNM1	Protein similar to RNase MRP RNA binding protein; ciclopirox olamine induced; regulated by Sef1, Sfu1, and Hap43; Spider biofilm induced	1.29368	3.95204	0.000689264	0.00345046	false	1.35391	4.07006	0.000457575	0.00186043	false	1.13757	3.97746	0.00182803	0.00497726	false	-0.359783	4.26274	0.208797	0.00497726	false
orf19.193		Ortholog of C. parapsilosis CDC317 : CPAR2_209710, Candida tenuis NRRL Y-1498 : CANTEDRAFT_113479, Debaryomyces hansenii CBS767 : DEHA2C15114g and Candida dubliniensis CD36 : CD36_19310	0.326024	3.08108	0.450462	> 0.05	false	0.737436	3.3986	0.0730184	> 0.05	false	0.790067	3.48669	0.0456779	> 0.05	false	0.160349	2.65198	0.666111	> 0.05	false
orf19.1930	CFL5	Ferric reductase; induced in low iron; ciclopirox olamine, flucytosine induced; amphotericin B, Sfu1 repressed; Tbf1, Hap43 induced	1.66638	4.21245	0.116118	> 0.05	false	0.681776	3.58828	0.482661	> 0.05	false	2.02723	4.62782	0.0305998	> 0.05	false	-0.0935707	5.27448	0.849075	> 0.05	false
orf19.1932	CFL4	C-terminus similar to ferric reductases; induced in low iron; Sfu1-repressed; ciclopirox olamine induced; colony morphology-related gene regulation by Ssn6; Hap43-repressed; Sef1-regulated	2.47692	2.47065	9.95616e-05	0.000642669	false	1.74427	1.96747	0.000789796	0.00300591	false	3.1937	3.18859	6.65057e-12	8.07759e-11	false	0.531007	1.42494	0.278692	> 0.05	false
orf19.1933		Ortholog(s) have role in peroxisome organization and peroxisomal membrane localization	-0.225469	6.20064	0.419642	> 0.05	false	-0.145355	6.31033	0.596312	> 0.05	false	-0.485345	6.21695	0.0884466	> 0.05	false	0.18418	5.57353	0.480161	> 0.05	false
orf19.1934	HST3	Histone H3K56 deacetylase; reduced copy number increases opaque cell formation; repressed by MMS, hydroxyurea and high-levels of hydrogen peroxide; Hap43p-induced; ectopic expression blocks genotoxin-induced switching; nicotinamide target	0.192219	5.58678	0.501592	> 0.05	false	0.13905	5.63086	0.623247	> 0.05	false	0.276632	5.76349	0.322784	> 0.05	false	-0.387314	6.51651	0.164257	> 0.05	false
orf19.1935		Ortholog of Candida albicans WO-1 : CAWG_04521	2.53586	-0.529245	0.0200539	> 0.05	false	3.04721	-0.12459	0.00108342	0.00393906	false	3.07186	-0.0443938	0.000740561	0.00221239	false	2.66874	-1.04701	0.0103735	0.00221239	false
orf19.1936	SNF1	Essential protein; functional homolog of S. cerevisiae Snf1p regulator of sugar metabolism; constitutively expressed; Thr208 phosphorylation may have regulatory role; up-regulation associated with azole resistance; has polyhistidine tract	-0.245065	8.01609	0.442372	> 0.05	false	-0.371048	8.03211	0.241299	> 0.05	false	-0.832806	7.90686	0.0113725	0.0247492	false	0.253191	7.49516	0.348497	0.0247492	false
orf19.1938		Ortholog of S.pombe SPCC825.05c; a predicted splicing coactivator; transcription repressed in azole-resistant strain overexpressing CDR1 and CDR2; induced by benomyl treatment	-0.435193	3.69288	0.291551	> 0.05	false	-0.475824	3.74315	0.244634	> 0.05	false	-0.483683	3.79947	0.203754	> 0.05	false	-0.15912	3.68273	0.621402	> 0.05	false
orf19.1939		Ortholog of S. cerevisiae : YDR374C, C. glabrata CBS138 : CAGL0A02970g, C. parapsilosis CDC317 : CPAR2_303320 and Candida tenuis NRRL Y-1498 : CANTEDRAFT_106457	0.64097	2.8412	0.117491	> 0.05	false	0.864364	3.05426	0.0353395	> 0.05	false	0.730685	3.0301	0.0511257	> 0.05	false	0.304698	2.58953	0.380401	> 0.05	false
orf19.194		Ortholog of C. parapsilosis CDC317 : CPAR2_209720, Candida tenuis NRRL Y-1498 : CANTEDRAFT_114035, Debaryomyces hansenii CBS767 : DEHA2E10494g and Candida dubliniensis CD36 : CD36_19300	0.456193	5.43098	0.138327	> 0.05	false	0.295294	5.41248	0.335816	> 0.05	false	0.472488	5.57115	0.136041	> 0.05	false	-0.0463552	5.73701	0.866432	> 0.05	false
orf19.1940		Ortholog(s) have role in ubiquinone biosynthetic process and mitochondrial inner membrane localization	-0.645229	6.16785	0.0309766	> 0.05	false	-0.599875	6.25745	0.0417582	> 0.05	false	-0.559166	6.33278	0.065128	> 0.05	false	0.166699	5.97052	0.541302	> 0.05	false
orf19.1941	NUF2	Kinetochore component; amount of Nuf2p and Mtw1p protein detected at each centromere is consistent with a single kinetochore microtubule attachment site	-0.209236	4.46092	0.515649	> 0.05	false	-0.214754	4.52906	0.509229	> 0.05	false	-0.192898	4.59872	0.525663	> 0.05	false	0.188987	4.90036	0.461707	> 0.05	false
orf19.1942	SGE1	Putative multidrug resistance factor; induced in low iron; regulated by Sef1, Sfu1, and Hap43	-0.513938	5.7635	0.0807821	> 0.05	false	-0.367947	5.89748	0.208978	> 0.05	false	-0.582484	5.866	0.0492818	> 0.05	false	-0.0825019	5.13588	0.751035	> 0.05	false
orf19.1943		Ortholog of C. parapsilosis CDC317 : CPAR2_302610, Candida dubliniensis CD36 : CD36_51070, Candida orthopsilosis Co 90-125 : CORT0E04770 and Spathaspora passalidarum NRRL Y-27907 : SPAPADRAFT_50634	3.66936	2.92304	2.02579e-08	3.89278e-07	false	3.72556	3.09086	2.50747e-07	2.44085e-06	false	3.76942	3.13355	2.86274e-09	2.4163e-08	false	1.39587	0.952843	0.00623975	0.0392886	false
orf19.1944	GPR1	Plasma membrane G-protein-coupled receptor of the cAMP-PKA pathway; required for WT hyphal growth; reports differ on role in cAMP-mediated glucose signaling; Gpr1 C terminus binds Gpa2; regulates HWP1 and ECE1; flow model biofilm induced	0.0372746	6.5948	0.906982	> 0.05	false	-0.181655	6.55981	0.517216	> 0.05	false	-0.574679	6.44684	0.0444907	> 0.05	false	-0.11594	6.39126	0.66365	> 0.05	false
orf19.1945	AUR1	Inositolphosphorylceramide (IPC) synthase; catalyzes the key step in sphingolipid biosynthesis; antifungal drug target; flow model biofilm induced; Spider biofilm induced	-0.256538	5.99835	0.399636	> 0.05	false	-0.0709512	6.15826	0.819879	> 0.05	false	0.436219	6.48696	0.149298	> 0.05	false	-0.212165	6.3275	0.444641	> 0.05	false
orf19.1946		Similar to an aldose 1-epimerase-related protein; antigenic during murine systemic infection; protein present in exponential and stationary phase yeast cultures; Hap43-induced; Spider biofilm repressed	-0.793263	8.36106	0.0137933	0.04316	false	-1.11327	8.32418	0.000565893	0.00224405	false	-1.36806	8.307	3.89666e-05	0.00015411	false	0.36528	8.17106	0.185823	0.00015411	false
orf19.1948		Ortholog of C. parapsilosis CDC317 : CPAR2_302560, Candida tenuis NRRL Y-1498 : CANTEDRAFT_135271, Debaryomyces hansenii CBS767 : DEHA2E12914g and Candida dubliniensis CD36 : CD36_51110	-0.0516844	4.93616	0.871358	> 0.05	false	-0.400796	4.8446	0.202946	> 0.05	false	-0.339796	4.93145	0.248227	> 0.05	false	0.143857	5.85506	0.567382	> 0.05	false
orf19.1949	VPS1	Dynamin-family GTPase-related protein; induced upon adherence to polystyrene; regulated by Gcn2p and Gcn4p	0.272132	8.73516	0.412253	> 0.05	false	0.806337	9.12423	0.0164205	0.0407489	false	0.375261	8.92368	0.272109	> 0.05	false	-0.0417341	8.28266	0.879043	> 0.05	false
orf19.1950		Ortholog(s) have phosphatase activity	0.197289	4.43167	0.554794	> 0.05	false	0.238655	4.52635	0.457689	> 0.05	false	0.169538	4.54816	0.584108	> 0.05	false	-0.0414745	3.27095	0.919577	> 0.05	false
orf19.1953		Predicted protein of unknown function; merged with orf19.1952 in Assembly 21	0.117497	5.36317	0.681306	> 0.05	false	0.450838	5.61928	0.112089	> 0.05	false	0.581213	5.75452	0.0381524	> 0.05	false	-0.366408	5.93357	0.149293	> 0.05	false
orf19.1954	PUS4	Putative pseudouridine synthase; transcript regulated by Nrg1, Mig1, and Tup1	0.277326	5.75092	0.330305	> 0.05	false	0.282816	5.82642	0.319534	> 0.05	false	0.358576	5.92709	0.216063	> 0.05	false	-0.934287	6.45706	0.00178181	0.01465	false
orf19.1955		Ortholog(s) have palmitoyltransferase activity, role in protein palmitoylation, protein targeting to membrane and endoplasmic reticulum palmitoyltransferase complex, extrinsic to endoplasmic reticulum membrane localization	0.153625	4.08742	0.694245	> 0.05	false	-0.075829	4.04072	0.838323	> 0.05	false	-0.266035	4.00808	0.444059	> 0.05	false	-0.427061	3.82534	0.151165	> 0.05	false
orf19.1956		Ortholog(s) have role in reciprocal meiotic recombination and mitochondrion localization	-0.440971	6.44085	0.166939	> 0.05	false	-0.0478659	6.69381	0.875503	> 0.05	false	0.454148	7.02187	0.153805	> 0.05	false	-0.504661	7.69835	0.0692046	> 0.05	false
orf19.1957	CYC3	Mitochondrial cytochrome c heme lyase; antigenic cell-wall protein; filament induced; induced on polystyrene adherence, interaction with macrophage; N-glycosylation, 2 heme-binding motifs; rat catheter, Spider biofilm induced	0.816859	5.06366	0.00728877	0.0253397	false	1.30438	5.46642	1.99138e-05	0.000114767	false	1.74615	5.85055	1.60793e-08	1.18866e-07	false	-0.869914	6.12391	0.00228254	0.0178011	false
orf19.1958		Ortholog of Candida albicans WO-1 : CAWG_04501	2.87475	1.36948	2.49209e-06	2.63348e-05	false	2.97005	1.52893	4.55927e-06	3.14387e-05	false	4.33558	2.76758	3.91942e-15	7.44578e-14	false	3.85534	0.823977	1.65527e-08	1.28341e-06	false
orf19.1959		Ortholog(s) have ubiquitin-specific protease activity, role in protein deubiquitination and cytosol, ribosome localization	-0.457055	5.36465	0.119823	> 0.05	false	-0.338496	5.48776	0.270104	> 0.05	false	0.0820892	5.74907	0.797223	> 0.05	false	-0.819799	6.29579	0.0024893	0.0191983	false
orf19.1960	CLN3	G1 cyclin; depletion abolishes budding and causes hyphal growth defects; farnesol regulated, functional in S. cerevisiae; possibly essential (UAU1 method); other biofilm induced; Spider biofilm induced	-1.48097	6.88598	9.12867e-07	1.12722e-05	false	-1.4212	6.97365	2.89081e-06	2.1229e-05	false	-0.749751	7.24949	0.0103703	0.0228818	false	-0.647227	6.38804	0.0146798	0.0228818	false
orf19.1961		Planktonic growth-induced gene	-1.61274	6.15067	4.46762e-06	4.38735e-05	false	-1.87591	6.16033	1.09417e-07	1.18827e-06	false	-1.22284	6.38773	0.000522043	0.00162967	false	-0.641659	6.54507	0.0230909	0.00162967	false
orf19.1963	GDS1	Putative mitochondrial protein; Hap43-repressed gene; Spider biofilm induced	-0.812035	8.65342	0.0137233	0.0429812	false	-0.767849	8.74204	0.0187249	0.0457858	false	-0.707928	8.82322	0.0378807	> 0.05	false	-0.994704	8.43901	0.00197532	0.0158884	false
orf19.1964		Protein of unknown function; repressed by fluphenazine treatment; induced by benomyl treatment and in an RHE model; regulated by Nrg1, Tup1	-2.55488	6.06332	6.84252e-14	3.62111e-12	true	-1.7822	6.2773	1.17319e-07	1.26174e-06	false	-0.597337	6.70419	0.0654744	> 0.05	false	-1.62009	7.04296	2.40628e-08	1.84426e-06	false
orf19.1966	BUD23	Putative methyltransferase; Hap43-induced; repressed by prostaglandins	2.07209	2.35979	0.000125179	0.000787449	false	2.73473	2.97725	1.23143e-07	1.31589e-06	false	3.52231	3.70083	1.48544e-13	2.30346e-12	false	-1.33175	5.29613	4.68532e-05	0.000749201	false
orf19.1967		Ortholog(s) have structural constituent of ribosome activity and mitochondrial large ribosomal subunit localization	-0.252605	5.15967	0.406465	> 0.05	false	0.0896575	5.39885	0.750433	> 0.05	false	0.626247	5.75976	0.025154	0.0492012	false	-0.301098	6.56686	0.259912	0.0492012	false
orf19.1968		Ortholog of C. parapsilosis CDC317 : CPAR2_501840, Debaryomyces hansenii CBS767 : DEHA2F24310g, Candida dubliniensis CD36 : CD36_51280 and Pichia stipitis Pignal : psti_CGOB_00091	0.0803873	2.14229	0.849508	> 0.05	false	-0.541413	1.91359	0.251099	> 0.05	false	-0.274715	2.09777	0.513359	> 0.05	false	-0.358028	2.46124	0.317981	> 0.05	false
orf19.1968.1		Predicted non-catalytic subunit of N-terminal acetyltransferase; Spider biofilm induced	-0.422559	2.56755	0.479503	> 0.05	false	0.00869232	2.83373	0.980982	> 0.05	false	0.187038	2.98634	0.674803	> 0.05	false	-0.238988	4.17038	0.432443	> 0.05	false
orf19.1969	CCW14	Putative mannoprotein of cell wall with role in response to stress; increased mRNA abundance observed in cyr1 homozygous mutant (hyphal or yeast-form cells) and in ras1 homozygous mutant (yeast-form cells)	3.96388	1.34921	1.39244e-07	2.22052e-06	false	3.54967	1.09529	3.55968e-06	2.53742e-05	false	4.33675	1.79217	2.6489e-09	2.2558e-08	false	2.44071	1.32057	1.0448e-05	0.000219079	false
orf19.1970		Putative vacuole biogenesis protein	-0.114735	6.1377	0.688838	> 0.05	false	-0.0920044	6.22085	0.738395	> 0.05	false	0.214264	6.43646	0.445489	> 0.05	false	0.0290581	6.46988	0.914669	> 0.05	false
orf19.1971	TRY3	RING-finger transcription factor; regulator of yeast form adherence; required for yeast cell adherence to silicone substrate; Spider biofilm induced	-0.860859	6.36754	0.00273039	0.0111489	false	-1.2518	6.31096	1.2711e-05	7.80448e-05	false	-0.78206	6.52662	0.00908151	0.0203616	false	-0.795395	6.8035	0.00914913	0.0203616	false
orf19.1972		Ortholog(s) have S-adenosylmethionine-dependent methyltransferase activity, role in histone lysine methylation and cytoplasm, nuclear chromatin localization	0.352708	6.27147	0.209375	> 0.05	false	0.335628	6.33449	0.217312	> 0.05	false	0.332901	6.3914	0.242689	> 0.05	false	-0.595517	6.72026	0.0296588	> 0.05	false
orf19.1973	HAP5	Component of CCAAT-binding transcription factor; roles in filamentous growth, low-iron induction of FRP1; regulates genes involved in respiratory growth; functional homolog of S. cerevisiae Hap5p; Cap1p-dependent expression in low iron	-0.16822	5.28002	0.571839	> 0.05	false	-0.239549	5.31811	0.415713	> 0.05	false	-0.261289	5.36724	0.372274	> 0.05	false	0.0214865	5.71352	0.936733	> 0.05	false
orf19.1974	TFS1	Putative carboxypeptidase y inhibitor; transcript regulated upon yeast-hypha switch; colony morphology-related gene regulation by Ssn6	-1.52929	8.75123	4.83195e-06	4.67626e-05	false	-1.85073	8.74728	2.26969e-08	2.9617e-07	false	-2.3645	8.70885	7.29829e-12	8.76847e-11	true	0.623514	7.53277	0.0296901	> 0.05	false
orf19.1975		Ortholog(s) have role in mRNA splicing, via spliceosome, mitotic cell cycle G2/M transition checkpoint, regulation of mitotic metaphase/anaphase transition and U4/U6 x U5 tri-snRNP complex, U5 snRNP localization	0.463632	3.78708	0.230393	> 0.05	false	0.406046	3.82456	0.329289	> 0.05	false	0.340524	3.84935	0.350239	> 0.05	false	-0.125656	4.5702	0.659405	> 0.05	false
orf19.1976	TRX2	Similar to thioredoxins; not expected to be enzymatically active because it lacks a canonical thioredoxin active site (Trp-Cys-Gly-Pro-Cys); TRX1 encodes all of the cytoplasmic/nuclear thioredoxin function in C. albicans; Hap43p-induced	1.53328	2.22778	0.000830266	0.00407075	false	1.5238	2.30018	0.00101529	0.00373338	false	1.52665	2.36106	0.000378377	0.00122299	false	-0.16442	2.43712	0.673213	0.00122299	false
orf19.1977	URA4	Dihydroorotase; protein present in exponential and stationary growth phase yeast cultures	-0.501784	6.08539	0.084306	> 0.05	false	-0.170268	6.30466	0.55135	> 0.05	false	0.104007	6.49958	0.72858	> 0.05	false	-0.26426	6.88116	0.325838	> 0.05	false
orf19.1978	GIT2	Putative glycerophosphoinositol permease; fungal-specific; repressed by alpha pheromone in SpiderM medium; Hap43-repressed; Spider biofilm induced	-0.289282	7.55505	0.411981	> 0.05	false	-0.147048	7.69336	0.67292	> 0.05	false	-0.344613	7.66141	0.335706	> 0.05	false	0.282962	7.48035	0.291937	> 0.05	false
orf19.1979	GIT3	Putative glycerophosphoinositol permease; white cell specific transcript; fungal-specific; alkaline repressed; caspofungin, macrophage/pseudohyphal-repressed; flow model biofilm induced; Spider biofilm induced	0.00814214	4.65251	0.991529	> 0.05	false	1.82968	5.90852	4.3557e-09	6.86615e-08	false	2.69158	6.67478	4.81772e-18	1.44705e-16	true	0.849489	6.02856	0.00891496	> 0.05	false
orf19.198	ASN1	Putative asparagine synthetase; soluble protein in hyphae; regulated by Rim101; decreased expression at pH 4 vs pH 8; protein detected during exponential and stationary phases of yeast-form growth	-0.197439	9.40141	0.562295	> 0.05	false	-0.714417	9.25565	0.0351565	> 0.05	false	-0.529273	9.38729	0.128189	> 0.05	false	-0.5559	10.1577	0.0385167	> 0.05	false
orf19.1980	GIT4	Putative glycerophosphoinositol permease; fungal-specific (no human or murine homolog); possibly an essential gene, disruptants not obtained by UAU1 method; Hap43p-repressed gene	1.58481	1.32177	0.00959341	0.0319365	false	1.58482	1.40284	0.00918567	0.024858	false	3.13426	2.68059	7.52288e-12	8.98971e-11	false	0.355594	-0.305632	0.67036	> 0.05	false
orf19.1981	IMP2	Predicted subunit of the mitochondrial inner membrane peptidase complex involved in protein targeting to mitochondria	0.132346	4.54182	0.693843	> 0.05	false	0.22443	4.6629	0.474328	> 0.05	false	0.337006	4.78353	0.268567	> 0.05	false	-0.226213	4.50981	0.405072	> 0.05	false
orf19.1985		Has aminoglycoside phosphotransferase and protein kinase domains; rat catheter and flow model biofilm induced	1.016	5.47285	0.00165801	0.00727823	false	1.18466	5.66116	0.000207547	0.000920162	false	0.651995	5.37122	0.050916	> 0.05	false	0.850096	3.83571	0.0110518	> 0.05	false
orf19.1986	ARO2	Putative chorismate synthase; fungal-specific (no human or murine homolog); protein level decreased in stationary phase yeast cultures; GlcNAc-induced protein	-0.200378	8.10578	0.533034	> 0.05	false	-1.0672	7.83706	0.000509245	0.00205051	false	-0.836993	7.97453	0.00788362	0.0179535	false	-0.394193	8.73745	0.14627	0.0179535	false
orf19.1988	CDC45	Putative DNA replication initiation factor; transcriptionally regulated by interaction with macrophage	-0.909627	4.93638	0.00260393	0.0106981	false	-1.21796	4.90427	5.36626e-05	0.000275248	false	-0.826899	5.09625	0.00512741	0.0123428	false	0.0405333	5.37016	0.87552	0.0123428	false
orf19.1989	DCW1	Protein with predicted GPI modification; dfg5 dcw1 double mutant is inviable; not required for wild-type hyphal growth; upregulated in cyr1 mutant (yeast or hyphal form); Hap43-induced	0.290565	7.02567	0.314027	> 0.05	false	0.187662	7.04239	0.514284	> 0.05	false	-0.133809	6.93835	0.645961	> 0.05	false	-0.178721	7.17864	0.510707	> 0.05	false
orf19.199		Protein of unknown function; hyphal-induced expression; upregulated in a cyr1 null mutant	0.774544	6.72919	0.0115232	0.0372272	false	1.14986	7.04987	0.000105633	0.000506007	false	0.66447	6.7919	0.0308675	> 0.05	false	0.0617595	6.35528	0.8161	> 0.05	false
orf19.1990	SNX4	Putative sorting nexin; induced during the mating process	0.198529	6.54656	0.488062	> 0.05	false	0.313318	6.68168	0.271043	> 0.05	false	0.0263775	6.58796	0.931621	> 0.05	false	0.288194	5.86746	0.251808	> 0.05	false
orf19.1991v1		0	-0.423334	6.88985	0.196118	> 0.05	false	-0.580495	6.89675	0.0724562	> 0.05	false	-0.691528	6.91206	0.0368572	> 0.05	false	0.200883	6.82731	0.457593	> 0.05	false
orf19.1991v2		0	0	-2.15937	1	> 0.05	false	-5.12548e-15	-2.2195	1	> 0.05	false	0	-2.09868	1	> 0.05	false	0	-2.62874	1	> 0.05	false
orf19.1992	SIR2	Required for wild-type lifespan, asymmetric inheritance of oxidatively damaged proteins, rDNA silencing; regulates phenotypic switch in strain 3153A, not WO-1; partially complements S. cerevisiae sir2 mating defect; Spider biofilm induced	1.28497	4.18417	0.000214478	0.00126226	false	1.55891	4.45759	3.54997e-06	2.53439e-05	false	1.97975	4.83502	3.87012e-10	3.67084e-09	false	-0.0421983	5.0613	0.870672	> 0.05	false
orf19.1993		Ortholog(s) have structural molecule activity, role in proteasome assembly, ubiquitin-dependent protein catabolic process and proteasome regulatory particle, lid subcomplex, proteasome storage granule localization	-0.905509	7.00381	0.00419726	0.0159563	false	-0.818908	7.10654	0.00426676	0.012833	false	-1.30287	7.00798	1.605e-05	6.8472e-05	false	0.104858	6.42238	0.738867	6.8472e-05	false
orf19.1994		Ortholog(s) have phosphatidylinositol-3-phosphate binding activity, role in retrograde transport, endosome to Golgi and endosome localization	0.409002	5.80383	0.169133	> 0.05	false	0.480242	5.91757	0.0982054	> 0.05	false	0.290802	5.86847	0.326057	> 0.05	false	0.461194	5.23491	0.0717976	> 0.05	false
orf19.1995	MNN24	Alpha-1,2-mannosyltransferase; required for normal cell wall mannan content	-0.854131	6.68012	0.0137569	0.0430663	false	-1.0765	6.67572	0.00058948	0.00232308	false	-0.313224	7.02842	0.30955	> 0.05	false	0.0582598	7.41784	0.848464	> 0.05	false
orf19.1996	CHA1	Similar to catabolic ser/thr dehydratases; repressed by Rim101; induced in low iron; regulated on white-opaque switch; filament induced; Tn mutation affects filamentation; flow model biofilm induced; Spider biofilm repressed	-2.30314	4.56241	4.8717e-11	1.64896e-09	true	-1.17633	4.8974	0.000193553	0.00086502	false	-0.29105	5.29462	0.347222	> 0.05	false	-0.0781767	5.92489	0.760705	> 0.05	false
orf19.1998		Ortholog of C. parapsilosis CDC317 : CPAR2_213870, Candida tenuis NRRL Y-1498 : CANTEDRAFT_92202, Debaryomyces hansenii CBS767 : DEHA2A01980g and Candida dubliniensis CD36 : CD36_16140	-0.364458	1.37021	0.512318	> 0.05	false	-0.667337	1.29422	0.229355	> 0.05	false	-1.17611	1.17748	0.028872	> 0.05	false	-0.510602	1.16415	0.260986	> 0.05	false
orf19.1999		Protein of unknown function; transcript detected on high-resolution tiling arrays	-0.663266	4.09778	0.0969259	> 0.05	false	-0.253158	4.3416	0.521191	> 0.05	false	0.0269165	4.53725	0.921876	> 0.05	false	0.307234	4.61206	0.249085	> 0.05	false
orf19.20	RTS1	Putative serine/threonine-protein phosphatase B-type regulatory subunit; transcription is regulated upon yeast-hyphal switch	-0.404473	8.90675	0.21763	> 0.05	false	-0.441332	8.96348	0.175355	> 0.05	false	-0.972368	8.81993	0.00358335	0.00905753	false	0.308521	7.9982	0.270381	0.00905753	false
orf19.200		Putative nuclear RNA-binding protein; Spider biofilm repressed	-1.10021	7.42107	0.000319506	0.00176656	false	-1.22209	7.45525	4.71976e-05	0.000246255	false	-1.5319	7.42758	5.35974e-07	3.07563e-06	false	0.114671	7.27068	0.674622	3.07563e-06	false
orf19.2000		Ortholog(s) have DNA helicase activity, role in DNA replication initiation, donor selection, mitotic sister chromatid cohesion, negative regulation of DNA recombination and cytosol, nucleus localization	1.05218	3.4512	0.00650313	0.023219	false	1.18243	3.6157	0.00214916	0.00715101	false	1.66918	4.02239	1.64042e-06	8.53887e-06	false	-0.945506	4.88694	0.00169488	0.0140216	false
orf19.2001		Has domain(s) with predicted L-ascorbic acid binding, iron ion binding, oxidoreductase activity, acting on paired donors, with incorporation or reduction of molecular oxygen and 2-oxoglutarate as one donor, more	-0.275365	3.7833	0.447917	> 0.05	false	-0.0768541	3.94841	0.836863	> 0.05	false	-0.12072	3.98577	0.725695	> 0.05	false	-0.0364395	3.95054	0.907242	> 0.05	false
orf19.2002		Ortholog(s) have structural constituent of nuclear pore activity and role in nuclear pore organization, poly(A)+ mRNA export from nucleus, protein import into nucleus, ribosomal large subunit export from nucleus	-0.374045	7.16077	0.211941	> 0.05	false	-0.30215	7.26483	0.297498	> 0.05	false	-0.263278	7.34117	0.371742	> 0.05	false	-0.453651	7.6653	0.115514	> 0.05	false
orf19.2003	HNM1	Putative choline/ethanolamine transporter; mutation confers hypersensitivity to toxic ergosterol analog; colony morphology-related gene regulation by Ssn6; clade-associated gene expression	0.975557	5.66187	0.0277269	> 0.05	false	1.47454	6.08474	0.000773684	0.00295099	false	1.77001	6.36535	7.23916e-05	0.000271795	false	-0.607322	6.19614	0.0204848	0.000271795	false
orf19.2005	REG1	Putative protein phosphatase regulatory subunit; Hap43-repressed gene; macrophage/pseudohyphal-induced; possibly regulated upon hyphal formation; flow model biofilm induced	0.119008	7.85354	0.740904	> 0.05	false	0.120907	7.92705	0.733525	> 0.05	false	-0.0809229	7.88388	0.822334	> 0.05	false	0.201975	7.31955	0.45994	> 0.05	false
orf19.2006		Ortholog(s) have fungal-type vacuole membrane localization	-0.116964	4.48199	0.723151	> 0.05	false	-0.104128	4.55934	0.746847	> 0.05	false	0.0602296	4.70082	0.864924	> 0.05	false	-0.382744	4.1389	0.188546	> 0.05	false
orf19.2006.1	COX17	Putative copper metallochaperone; Hap43p-repressed gene; rat catheter biofilm induced; Spider biofilm induced	-0.776236	4.27262	0.0496113	> 0.05	false	-0.0938961	4.63798	0.773113	> 0.05	false	0.112461	4.80176	0.76692	> 0.05	false	0.497645	4.60254	0.114187	> 0.05	false
orf19.2007		Ortholog(s) have role in Golgi to vacuole transport, ascospore wall assembly, retrograde transport, endosome to Golgi and GARP complex, mitochondrion localization	-0.092368	7.15306	0.755	> 0.05	false	-0.0393954	7.25136	0.890865	> 0.05	false	-0.47788	7.10971	0.103065	> 0.05	false	0.273164	7.04216	0.314608	> 0.05	false
orf19.2008		Ortholog(s) have S-methyl-5-thioribose-1-phosphate isomerase activity, role in L-methionine salvage from methylthioadenosine and cytosol, nucleus localization	-0.236061	6.36623	0.402608	> 0.05	false	-0.218261	6.44651	0.429253	> 0.05	false	-0.290328	6.47237	0.301154	> 0.05	false	-0.387575	6.47142	0.150935	> 0.05	false
orf19.2009	PEX12	Ortholog(s) have ubiquitin-protein ligase activity, role in protein import into peroxisome matrix and integral to peroxisomal membrane localization	0.8933	6.08723	0.00207039	0.00880444	false	0.83604	6.12326	0.0031397	0.00984275	false	0.26766	5.84339	0.363748	> 0.05	false	0.487599	4.80898	0.0786901	> 0.05	false
orf19.201		Protein of unknown function; unmerged from orf19.202 in a revision of Assembly 21	-0.166914	4.74999	0.608188	> 0.05	false	-0.0623719	4.87161	0.833916	> 0.05	false	-0.547317	4.71092	0.0819969	> 0.05	false	0.559284	3.60242	0.0799896	> 0.05	false
orf19.2010		Ortholog of C. parapsilosis CDC317 : CPAR2_213800, Debaryomyces hansenii CBS767 : DEHA2A01320g, Candida dubliniensis CD36 : CD36_16030 and Pichia stipitis Pignal : PICST_29434	6.46531	-0.174503	7.39443e-05	0.000501588	false	6.59353	-0.0857714	1.44422e-05	8.69921e-05	false	6.5773	-0.00393995	4.33754e-06	2.08677e-05	false	2.32201	-1.72766	0.150744	2.08677e-05	false
orf19.2012	NOT3	Transcriptional regulator; not required for buccal epithelial cell adherence or virulence in mouse systemic infection; null mutant colonies exhibit slightly decreased filamentation ratio; required for yeast adherence to silicone substrate	-0.0324528	6.34544	0.910364	> 0.05	false	0.218785	6.54783	0.425855	> 0.05	false	0.277937	6.63855	0.329557	> 0.05	false	-0.124467	7.50472	0.649217	> 0.05	false
orf19.2013	KAR2	Similar to Hsp70 family chaperones; role in translocation of proteins into the ER; induced in high iron; protein present in exponential and stationary growth phase yeast cultures; flow model and Spider biofilm repressed	0.337414	11.3034	0.352053	> 0.05	false	0.285302	11.3471	0.402187	> 0.05	false	-0.220486	11.1499	0.53259	> 0.05	false	0.435821	12.3298	0.101898	> 0.05	false
orf19.2014	BCY1	Protein kinase A regulatory subunit; required for nuclear localization of Tpk1; physically interacts with Tpk1; essential; apoptosis-regulated; bcy1 heterozygous or bcy1 tpk2 mutant has filamentous growth defect	-0.961547	9.2539	0.0160685	0.0488353	false	-0.949735	9.33038	0.0170717	0.0422233	false	-1.50756	9.22183	0.000222255	0.000758442	false	0.323448	8.56664	0.241354	0.000758442	false
orf19.2016	ERG28	Ortholog(s) have protein binding, bridging activity, role in ergosterol biosynthetic process and endoplasmic reticulum membrane localization	-1.09356	5.89988	0.000358877	0.00195506	false	-0.756389	6.08829	0.00823635	0.0226942	false	-0.597909	6.20885	0.0419595	> 0.05	false	0.256179	6.06589	0.331482	> 0.05	false
orf19.2017		Ortholog(s) have role in regulation of cell size, transcription elongation from RNA polymerase I promoter, transcription of nuclear large rRNA transcript from RNA polymerase I promoter and DNA-directed RNA polymerase I complex localization	0.895104	4.67049	0.00963499	0.032011	false	1.05348	4.84837	0.000522	0.00209302	false	1.97457	5.58345	1.69494e-10	1.66448e-09	false	-1.22409	7.38735	9.27748e-05	0.00130511	false
orf19.2018		Protein with a predicted DnaJ chaperone domain and a CSL-type zinc finger; Spider biofilm induced	1.37929	1.98521	0.00544878	0.0200289	false	2.17791	2.66667	1.32264e-06	1.07031e-05	false	2.90656	3.3244	1.12827e-12	1.49568e-11	false	-0.558569	4.78122	0.0340607	> 0.05	false
orf19.2018.1		PProtein of unknown function; gene has intron; similar to human BLOC1S2	-1.00495	2.02414	0.0622722	> 0.05	false	-1.51662	1.92066	0.00719042	0.0201962	false	-0.792789	2.22334	0.13073	> 0.05	false	-1.08465	1.48869	0.0123468	> 0.05	false
orf19.2018.2		0	0	-2.15937	1	> 0.05	false	-5.12548e-15	-2.2195	1	> 0.05	false	0	-2.09868	1	> 0.05	false	0	-2.62874	1	> 0.05	false
orf19.2019		Ortholog(s) have structural constituent of ribosome activity and mitochondrial large ribosomal subunit localization	-0.600854	6.0846	0.0432234	> 0.05	false	-0.479624	6.20588	0.104797	> 0.05	false	-0.169264	6.4032	0.569171	> 0.05	false	-0.178346	6.99646	0.50824	> 0.05	false
orf19.202	CDC47	Phosphorylated protein described as having role in control of cell division; RNA abundance regulated by tyrosol and cell density; merged with orf19.201 in Assembly 20; unmerged from orf19.201 in a revision of Assembly 21	-0.940684	6.99662	0.00180692	0.0078492	false	-0.99198	7.05099	0.000536967	0.00214145	false	-0.975821	7.11537	0.00100444	0.00290316	false	-0.20846	7.57151	0.439374	0.00290316	false
orf19.2020	HGT6	Putative high-affinity MFS glucose transporter; 20 family members; induced in core stress response; fluconazole, oralpharyngeal candidasis induced; flow model biofilm induced; Spider biofilm induced	-1.55474	10.709	4.99016e-05	0.000361286	false	-2.5654	10.584	6.31949e-09	9.66477e-08	true	-3.32699	10.5544	7.33029e-16	1.54678e-14	true	1.34566	9.68869	2.11407e-05	0.000379963	false
orf19.2021	HGT8	High-affinity glucose transporter of the major facilitator superfamily; 20 members in the C. albicans glucose transporter family; 12 probable membrane-spanning segments; gene has intron; expressed in rich medium; flow model biofilm induced	-2.90459	9.97168	4.64822e-15	3.00916e-13	true	-4.21386	9.93883	6.84586e-21	6.91639e-19	true	-4.29498	9.99345	2.91573e-25	2.06831e-23	true	-0.196366	8.32346	0.466897	> 0.05	false
orf19.2023	HGT7	Putative MFS glucose transporter; glucose, fluconazole, Snf3 induced, expressed at high glucose; 20 member C. albicans glucose transporter family; 12 TM regions predicted; flow model biofilm induced; Spider biofilm repressed	-1.76667	13.1894	6.54669e-06	6.13971e-05	false	-3.4191	13.0192	1.065e-12	3.39779e-11	true	-4.56653	13.0084	1.88659e-26	1.53412e-24	true	1.02971	11.9168	0.00431266	0.0298617	false
orf19.2024		Ortholog of Candida dubliniensis CD36 : CD36_15915 and Candida albicans WO-1 : CAWG_03878	1.41876	1.91816	0.0042065	0.0159823	false	0.972796	1.69503	0.0619237	> 0.05	false	2.05993	2.53096	5.79605e-06	2.70266e-05	false	4.004	0.957909	1.61068e-10	2.28511e-08	false
orf19.2025		Ortholog of Candida albicans WO-1 : CAWG_03877	1.5304	-0.704239	0.141336	> 0.05	false	1.8389	-0.480558	0.100482	> 0.05	false	2.40676	-0.0684912	0.00893094	0.0200443	false	0.330252	-1.54018	1	0.0200443	false
orf19.2026	UBP13	Ortholog of S. cerevisiae Ubp13; putative ubiquitin carboxyl-terminal hydrolase; flow model biofilm induced; rat catheter biofilm repressed	-0.497895	7.05951	0.0786693	> 0.05	false	-0.805265	7.01144	0.00340158	0.0105545	false	-1.19622	6.93935	2.8814e-05	0.000117584	false	0.578863	6.32005	0.0495137	0.000117584	false
orf19.2028	MXR1	Putative methionine sulfoxide reductase; Plc1-regulated; induced by human neutrophils, flucytosine; macrophage regulated (gene induced, protein decreased); possibly adherence-induced; Spider biofilm induced	2.58966	6.85494	8.51557e-18	8.22925e-16	true	2.63406	6.96645	1.91054e-19	1.55359e-17	true	2.24771	6.69953	3.47e-13	5.06302e-12	true	-0.232387	4.77059	0.373399	> 0.05	false
orf19.2029	RFC5	Putative heteropentameric replication factor C subunit; periodic mRNA expression, peak at cell-cycle G1/S phase	-0.132984	5.27047	0.654267	> 0.05	false	0.359881	5.60008	0.220458	> 0.05	false	0.304095	5.62756	0.313558	> 0.05	false	-0.0211205	5.83144	0.937452	> 0.05	false
orf19.203	STB3	Putative SIN3-binding protein 3 homolog; caspofungin induced; macrophage/pseudohyphal-repressed; rat catheter biofilm induced	0.0774665	5.8051	0.822419	> 0.05	false	-0.0494339	5.81278	0.867816	> 0.05	false	-0.270059	5.76668	0.386822	> 0.05	false	1.2977	4.58684	6.33703e-05	0.000966941	false
orf19.2030		Plasma membrane-associated protein; induced in cyr1 or ras1 mutant; induced by hypoxia, ketoconazole and during growth in the mouse cecum; induced in oralpharyngeal candidasis; Spider biofilm induced	1.44513	7.27342	1.76806e-06	1.95838e-05	false	1.74253	7.56963	2.06275e-08	2.72905e-07	false	1.08201	7.14853	0.000162643	0.000571997	false	0.67346	4.4796	0.0458708	0.000571997	false
orf19.2031	VPS24	Protein similar to S. cerevisiae Vps24p, which is a member of the ESCRT III protein sorting complex; downregulated upon adherence to polystyrene	1.31494	6.10256	3.76548e-06	3.78136e-05	false	1.51136	6.31867	5.50343e-08	6.48355e-07	false	1.02351	6.03252	0.000372388	0.00120538	false	0.107558	4.54276	0.691201	0.00120538	false
orf19.2032		Protein of unknown function; rat catheter biofilm induced	0	-2.15937	1	> 0.05	false	-5.12548e-15	-2.2195	1	> 0.05	false	0	-2.09868	1	> 0.05	false	0	-2.62874	1	> 0.05	false
orf19.2033	PGA19	Putative GPI-anchored protein; macrophage-induced gene; mutants are viable	4.56005	2.21927	1.1663e-10	3.70329e-09	false	5.50509	3.16745	2.23102e-16	1.2397e-14	false	4.98148	2.71085	6.04095e-16	1.28913e-14	false	1.88929	0.379528	0.000989371	0.00911205	false
orf19.2034		Ortholog of C. parapsilosis CDC317 : CPAR2_212925, Candida dubliniensis CD36 : CD36_15840, Candida orthopsilosis Co 90-125 : CORT0A12230 and Candida tropicalis MYA-3404 : CTRG_01156	3.18098	-0.709301	0.00886681	0.0298004	false	4.46741	0.258466	1.65021e-05	9.77229e-05	false	5.60421	1.24733	1.0649e-10	1.09242e-09	false	5.05535	-1.62723	0.0120331	> 0.05	false
orf19.2035		Ortholog of C. parapsilosis CDC317 : CPAR2_212930, Candida dubliniensis CD36 : CD36_15830, Candida orthopsilosis Co 90-125 : CORT0A12240 and Candida tropicalis MYA-3404 : CTRG_01155	2.48493	2.34235	1.77146e-07	2.69069e-06	false	2.26345	2.25056	1.02197e-05	6.4715e-05	false	3.30006	3.16597	1.7572e-14	3.05928e-13	false	-0.4354	1.29556	0.361929	> 0.05	false
orf19.2036		Predicted dihydrodiol dehydrogenase; ortholog of S. pombe SPAC513.06c; flow model and rat catheter biofilm repressed	-0.194804	5.46262	0.494267	> 0.05	false	-0.219811	5.52256	0.437176	> 0.05	false	-0.0100744	5.68286	0.975456	> 0.05	false	-0.126495	5.67706	0.630495	> 0.05	false
orf19.2037		Ortholog of C. parapsilosis CDC317 : CPAR2_212950, Candida tenuis NRRL Y-1498 : CANTEDRAFT_116162, Debaryomyces hansenii CBS767 : DEHA2D18392g and Candida dubliniensis CD36 : CD36_15810	-0.0862363	5.24373	0.784532	> 0.05	false	-0.0668794	5.32506	0.827105	> 0.05	false	-0.130501	5.35335	0.652823	> 0.05	false	0.310496	5.53131	0.223836	> 0.05	false
orf19.2038		Protein of unknown function; Spider biofilm induced	1.94789	3.23385	0.000534408	0.00277526	false	1.08128	2.69626	0.0202941	0.0491183	false	1.72858	3.18771	0.00203249	0.00546698	false	2.73229	6.12891	2.74346e-22	2.61334e-19	true
orf19.2039	MSF1	Putative phenylalanine-tRNA ligase; protein level decreases in stationary phase cultures; Hap43p-repressed gene	-0.367818	6.26773	0.205828	> 0.05	false	-0.103444	6.46183	0.721232	> 0.05	false	0.0218271	6.58258	0.948892	> 0.05	false	-0.388056	6.5251	0.144397	> 0.05	false
orf19.204		Ortholog of Candida dubliniensis CD36 : CD36_23180, Candida tropicalis MYA-3404 : CTRG_01968 and Candida albicans WO-1 : CAWG_05983	0.929213	3.19556	0.0169312	> 0.05	false	1.64699	3.77565	1.63267e-05	9.6849e-05	false	1.87713	4.00671	1.12669e-07	7.1687e-07	false	0.188195	3.19732	0.556797	> 0.05	false
orf19.2040		Ortholog(s) have oxidoreductase activity, acting on NADH or NADPH activity, role in iron-sulfur cluster assembly, oxidation-reduction process and mitochondrion localization	-0.315958	5.56392	0.297099	> 0.05	false	-0.0525734	5.75962	0.870211	> 0.05	false	0.00116502	5.84509	0.993629	> 0.05	false	-0.127858	6.24002	0.62384	> 0.05	false
orf19.2041		Ortholog(s) have DNA translocase activity, histone acetyl-lysine binding activity	-0.346147	6.3052	0.239328	> 0.05	false	-0.45995	6.32797	0.104478	> 0.05	false	-0.527373	6.35855	0.0798727	> 0.05	false	0.071682	6.89927	0.79413	> 0.05	false
orf19.2042		Ortholog(s) have role in mitochondrial tRNA wobble uridine modification, positive regulation of flocculation via cell wall protein-carbohydrate interaction by positive regulation of transcription from RNA polymerase II promoter	0.285122	4.64788	0.361522	> 0.05	false	0.510238	4.84912	0.083782	> 0.05	false	0.696376	5.01969	0.0171563	0.0354174	false	-0.409496	5.53307	0.107813	0.0354174	false
orf19.2043		Has domain(s) with predicted ATP binding, nucleoside-triphosphatase activity	0.153262	4.34604	0.66199	> 0.05	false	0.270628	4.48147	0.413985	> 0.05	false	0.520433	4.68219	0.0900836	> 0.05	false	-0.575368	4.74848	0.0291511	> 0.05	false
orf19.2044	PGA27	Putative GPI-anchored protein	1.38227	3.22089	0.000578009	0.00296931	false	1.85638	3.65136	2.40464e-06	1.79957e-05	false	1.98171	3.80211	2.30663e-08	1.65561e-07	false	-0.235767	4.00889	0.445246	> 0.05	false
orf19.2045		Ortholog(s) have diacylglycerol kinase activity, role in phosphatidic acid biosynthetic process and integral to endoplasmic reticulum membrane localization	0.287215	4.72784	0.397709	> 0.05	false	0.444353	4.89019	0.154815	> 0.05	false	1.29785	5.49872	4.92748e-05	0.000191471	false	-0.814195	6.73134	0.00763336	0.0458975	false
orf19.2046	POT1-2	Putative peroxisomal 3-ketoacyl CoA thiolase; Hap43-repressed	0.229209	5.23064	0.469581	> 0.05	false	0.0849435	5.22654	0.7845	> 0.05	false	-0.337053	5.08274	0.312939	> 0.05	false	0.234901	3.39107	0.478599	> 0.05	false
orf19.2047		Putative protein of unknown function; Hap43p-repressed gene; mutation confers hypersensitivity to toxic ergosterol analog, and to amphotericin B	-1.91083	6.34654	3.59009e-06	3.62159e-05	false	-1.93153	6.41298	1.56796e-06	1.24615e-05	false	-2.70806	6.34187	1.57172e-10	1.55493e-09	true	0.83223	3.71866	0.0255928	> 0.05	false
orf19.2048		Proten of unknown function; transcript positively regulated by Sfu1; Hap43 repressed; Spider biofilm induced	-3.52498	7.20131	2.94839e-10	8.40253e-09	true	-2.83294	7.34189	1.28515e-07	1.36884e-06	true	-2.63557	7.42696	1.41918e-06	7.48069e-06	true	2.93282	3.01664	8.90347e-08	5.82042e-06	false
orf19.2049		Plasma membrane-associated protein; heterozygous null mutant displays sensitivity to virgineone; Spider biofilm induced	1.68734	4.58348	1.24057e-06	1.44618e-05	false	4.20706	6.84445	1.36914e-35	5.07189e-33	true	4.41222	7.09894	4.61905e-26	3.54021e-24	true	0.927571	2.1061	0.0118155	> 0.05	false
orf19.2050		Ortholog(s) have sterol esterase activity, role in cellular lipid metabolic process, sterol metabolic process and fungal-type vacuole, integral to membrane, lipid particle localization	-0.506812	7.04116	0.0779192	> 0.05	false	-0.376352	7.16885	0.186163	> 0.05	false	-1.02164	6.98035	0.000390713	0.00125737	false	0.84978	5.17814	0.00224112	0.0175603	false
orf19.2051		Has domain(s) with predicted zinc ion binding activity and intracellular localization	-0.478492	5.79329	0.0991134	> 0.05	false	-0.241836	5.9693	0.394839	> 0.05	false	-0.0717044	6.10941	0.811537	> 0.05	false	0.34739	6.08973	0.188408	> 0.05	false
orf19.2054	FGR15	Putative transcription factor with zinc finger DNA-binding motif; lacks an ortholog in S. cerevisiae; transposon mutation affects filamentous growth; caspofungin induced; mutation causes marginal increase in caspofungin sensitivity	0.488	4.60826	0.121561	> 0.05	false	0.650428	4.77871	0.0332464	> 0.05	false	0.793861	4.92621	0.0082184	0.0186586	false	0.451797	5.04911	0.0729794	0.0186586	false
orf19.2055	NPL6	Putative nuclear protein localization factor; Hap43-induced; Spider biofilm repressed	-0.261582	6.16907	0.358733	> 0.05	false	-0.145925	6.29512	0.602171	> 0.05	false	-0.372238	6.25044	0.196959	> 0.05	false	-0.36152	6.61967	0.173301	> 0.05	false
orf19.2057		Ortholog(s) have ATP binding, ATPase activity, metallopeptidase activity, role in protein complex assembly, proteolysis, signal peptide processing and m-AAA complex, mitochondrial inner boundary membrane localization	-1.08551	7.64546	0.00186309	0.00807064	false	-0.842482	7.80029	0.013068	0.0335273	false	-0.870648	7.84906	0.013258	0.0283165	false	-0.0806619	7.46078	0.767237	0.0283165	false
orf19.2059		Protein with homology to magnesium-dependent endonucleases and phosphatases; regulated by Sef1, Sfu1, and Hap43; Spider biofilm induced	1.56136	5.90684	0.00135095	0.00613937	false	1.85548	6.20479	0.000144677	0.000667154	false	1.47122	5.97107	0.00287972	0.00742535	false	-1.37019	4.22076	0.00179323	0.0147076	false
orf19.206		Putative adhesin-like protein	-0.0506244	6.16732	0.866503	> 0.05	false	0.237287	6.38868	0.399909	> 0.05	false	0.182405	6.41765	0.527193	> 0.05	false	-0.178497	5.72769	0.507554	> 0.05	false
orf19.2060	SOD5	Cu and Zn-containing superoxide dismutase; protects against oxidative stress; induced by neutrophils, hyphal growth, caspofungin, osmotic/oxidative stress; oralpharyngeal candidiasis induced; rat catheter and Spider biofilm induced	2.25487	12.1763	3.62732e-10	9.99461e-09	true	2.61339	12.5514	3.38289e-13	1.16876e-11	true	1.83924	11.973	1.6041e-06	8.38255e-06	false	0.947773	10.8047	0.000824504	0.00786523	false
orf19.2061		Protein of unknown function; mutants are viable	5.56273	4.73499	2.97018e-24	6.60171e-22	true	6.86362	6.06836	2.33832e-35	8.20627e-33	true	6.20494	5.51687	5.75432e-24	3.65427e-22	true	0.98012	1.75773	0.0244214	> 0.05	false
orf19.2062	SOD4	Cu and Zn-containing superoxide dismutase; role in response to host innate immune ROS; regulated on white-opaque switch; ciclopirox olamine induced; caspofungin repressed; SOD1,4,5,6 gene family; yeast-associated; Spider biofilm induced	1.1784	4.42109	0.0104534	0.0344171	false	2.24158	5.30193	3.39606e-07	3.18047e-06	true	2.52754	5.5924	6.42445e-10	5.86825e-09	true	0.572215	6.15061	0.407164	> 0.05	false
orf19.2063		Ortholog of C. parapsilosis CDC317 : CPAR2_213140, Lodderomyces elongisporus NRLL YB-4239 : LELG_01226, Debaryomyces hansenii CBS767 : DEHA2B02442g and Candida dubliniensis CD36 : CD36_15600	-0.192048	6.22191	0.499942	> 0.05	false	-0.216814	6.28242	0.440251	> 0.05	false	-0.698925	6.13686	0.0169572	0.0350867	false	-0.0877507	5.78329	0.738232	0.0350867	false
orf19.2064		Putative transcription factor with zinc finger DNA-binding motif	0.0506876	5.75729	0.867688	> 0.05	false	-0.488311	5.57806	0.0848148	> 0.05	false	-0.878505	5.48577	0.00270277	0.00700742	false	0.284258	4.25011	0.37208	0.00700742	false
orf19.2065		Ortholog(s) have role in allantoin catabolic process and cytosol, nucleus localization	-0.189907	5.7839	0.549155	> 0.05	false	-0.196586	5.85267	0.532262	> 0.05	false	-0.305558	5.86112	0.386594	> 0.05	false	0.542884	5.42931	0.049225	> 0.05	false
orf19.2066		Ortholog(s) have cytoplasm localization	-0.17586	3.40348	0.676542	> 0.05	false	0.0432598	3.58074	0.915186	> 0.05	false	0.266133	3.75909	0.516912	> 0.05	false	-0.515384	4.33421	0.075448	> 0.05	false
orf19.2066.1	ATP18	F1F0 ATP synthase complex subunit; gene has intron	-0.291562	7.93016	0.344833	> 0.05	false	-0.0605896	8.11122	0.844123	> 0.05	false	-0.42722	8.0017	0.175915	> 0.05	false	-0.0492972	7.60788	0.859099	> 0.05	false
orf19.2067		Protein with a predicted role in mitochondrial iron metabolism; Hap43-repressed; expression upregulated during growth in the mouse cecum; Spider biofilm induced	1.62417	5.45259	5.39647e-08	9.49437e-07	false	2.06313	5.86877	2.0629e-12	6.11352e-11	true	1.32637	5.36626	5.31142e-06	2.50294e-05	false	0.347749	5.1861	0.164953	2.50294e-05	false
orf19.2068		Ortholog of C. parapsilosis CDC317 : CPAR2_213190, Candida tenuis NRRL Y-1498 : CANTEDRAFT_119026, Debaryomyces hansenii CBS767 : DEHA2G08514g and Candida dubliniensis CD36 : CD36_15550	-0.346658	6.04909	0.229707	> 0.05	false	-0.714257	5.96906	0.0136737	0.0348401	false	-0.853199	5.97664	0.0037715	0.00945783	false	-0.020961	5.76138	0.939752	0.00945783	false
orf19.2069	SMF3	Putative vacuolar iron transporter; alkaline upregulated; caspofungin repressed; induced by Mnl1 under weak acid stress; Hap43-repressed	-1.46071	7.34018	3.5347e-06	3.58749e-05	false	-1.41425	7.4246	5.60948e-06	3.76677e-05	false	-1.66237	7.41984	1.13752e-07	7.22379e-07	false	0.346523	6.54416	0.204501	> 0.05	false
orf19.207	PGA55	GPI-anchored adhesin-like protein; filament induced; regulated by Nrg1, Tup1; regulated upon hyphal formation; mRNA binds to She3 and is localized to yeast-form buds and hyphal tips; induced during chlamydospore formation	0.291383	5.35103	0.341153	> 0.05	false	0.497911	5.54119	0.104584	> 0.05	false	0.7176	5.73227	0.0184366	0.0376064	false	-0.652678	5.49478	0.0168916	0.0376064	false
orf19.2070		Ortholog(s) have role in G1/S transition of mitotic cell cycle, chromatin remodeling, nucleosome disassembly, transcription elongation from RNA polymerase II promoter and RSC complex localization	0.0508686	6.62371	0.858772	> 0.05	false	0.222031	6.78597	0.415121	> 0.05	false	-0.033131	6.7125	0.908568	> 0.05	false	0.157287	7.06224	0.558856	> 0.05	false
orf19.2071		Protein of unknown function; induced by alpha pheromone in SpiderM medium	3.06713	-0.777173	0.0162344	0.049205	false	1.64721	-1.42071	0.405373	> 0.05	false	3.35352	-0.478015	0.00275995	0.00714139	false	2.07949	-1.82129	0.24337	0.00714139	false
orf19.2072		Ortholog(s) have choline transmembrane transporter activity, ethanolamine transmembrane transporter activity and role in choline transport, ethanolamine transport, glycine betaine transport	0.289807	3.60779	0.447057	> 0.05	false	1.09872	4.18133	0.00182999	0.00622569	false	1.49084	4.51226	6.25128e-05	0.000238328	false	-0.165652	2.54566	0.653482	0.000238328	false
orf19.2073		Protein with a multidrug and toxin extrusion protein domain; induced by Mnl1 under weak acid stress	-0.268336	6.37781	0.357502	> 0.05	false	-0.353801	6.41159	0.202211	> 0.05	false	-0.393139	6.4533	0.165006	> 0.05	false	-0.198482	5.67862	0.467671	> 0.05	false
orf19.2074		Ortholog of Candida albicans WO-1 : CAWG_03833	6.28497	-0.311275	5.03545e-05	0.000362988	false	6.31255	-0.296184	6.24929e-05	0.000314492	false	6.39013	-0.139755	2.20604e-05	9.17074e-05	false	-0.517773	-1.92718	1	9.17074e-05	false
orf19.2075	DFG5	N-linked mannoprotein of cell wall and membrane; possible signal transducer; role in hyphal growth and HWP1 induction in alkaline pH; GPI modification predicted; dfg5 dcw1 double mutant is inviable; caspofungin-induced, fungal-specific	-1.07525	8.3457	0.0184786	> 0.05	false	-0.998629	8.44311	0.0283142	> 0.05	false	-1.21774	8.43239	0.00838599	0.0190003	false	-0.103067	6.78938	0.701959	0.0190003	false
orf19.2076		Protein of unknown function; S. pombe ortholog SPAC7D4.05 encodes a predicted hydrolase; Hap43-repressed; Spider biofilm induced	-0.805557	6.74174	0.0135568	0.0425665	false	-1.26539	6.6619	9.39618e-05	0.000456993	false	-1.84662	6.57271	3.03878e-08	2.12619e-07	false	1.56638	5.60209	3.02175e-07	1.50366e-05	false
orf19.2077	ZCF9	Putative Zn(II)2Cys6 transcription factor; hypersensitive to toxic ergosterol analog ECC69 and/or ECC1384	0.175461	5.6744	0.552198	> 0.05	false	0.406119	5.87425	0.158617	> 0.05	false	0.162056	5.79832	0.574202	> 0.05	false	-0.450089	4.71798	0.0967116	> 0.05	false
orf19.2078		Ortholog(s) have role in Golgi to vacuole transport and AP-1 adaptor complex localization	-0.201515	6.70835	0.486578	> 0.05	false	-0.534532	6.63433	0.0600186	> 0.05	false	-0.797262	6.59117	0.00562256	0.0133464	false	0.438887	6.12489	0.0945024	0.0133464	false
orf19.2079	PHHB	Putative 4a-hydroxytetrahydrobiopterin dehydratase; transposon mutation affects filamentous growth; flow model biofilm induced; Spider biofilm induced	-0.788703	5.06955	0.00675409	0.0238919	false	-0.764038	5.14892	0.00809724	0.0223776	false	-1.25503	5.04387	3.50524e-05	0.000139958	false	0.504632	3.77452	0.102092	0.000139958	false
orf19.2081	POM152	Putative nuclear pore membrane glycoprotein	-0.0942024	6.78177	0.744906	> 0.05	false	-0.0843415	6.8589	0.75913	> 0.05	false	-0.208133	6.85861	0.465066	> 0.05	false	-0.340519	7.67406	0.21669	> 0.05	false
orf19.2082	SAP30	Aspartic-type endopeptidase; involved in degradation of alpha pheromone; functional equivalent of S. cerevisiae Bar1; a-cell specific; induced by alpha pheromone	2.14979	2.57451	4.93875e-06	4.75203e-05	false	1.69411	2.30903	0.000344531	0.00143673	false	1.48019	2.21298	0.000630775	0.00191618	false	0.952215	1.63944	0.0334622	0.00191618	false
orf19.2084	CDH1	Protein involved in regulation of mitosis; similar to S. cerevisiae Cdh1, which is an APC/C component; transcriptionally induced by Mnl1 under weak acid stress	-0.202941	5.79837	0.477086	> 0.05	false	-0.230042	5.85753	0.412756	> 0.05	false	-0.636407	5.74213	0.0264458	> 0.05	false	-0.0260666	5.65065	0.922175	> 0.05	false
orf19.2087	SAS2	Predicted histone acetyltransferase involved in histone H4 acetylation; member of MYST family	0.0872918	4.08468	0.809438	> 0.05	false	0.126824	4.17665	0.718087	> 0.05	false	0.367018	4.36747	0.263526	> 0.05	false	-0.126362	5.04085	0.624013	> 0.05	false
orf19.2088		Putative DNA polymerase epsilon subunit D; null mutant is viable but slow-growing and displays abnormal invasive growth on SD and YPD media; Spider biofilm repressed	-0.658814	5.45544	0.0229579	> 0.05	false	-0.788241	5.47682	0.00608751	0.0175493	false	-0.497628	5.65101	0.0860185	> 0.05	false	0.114983	5.82187	0.656078	> 0.05	false
orf19.2089		Ortholog of Nyv1, v-SNARE component of the vacuolar SNARE complex involved in vesicle fusion in S. cerevisiae; Hap43-repressed gene	0.260532	5.81543	0.377215	> 0.05	false	0.221304	5.86645	0.445608	> 0.05	false	-0.453635	5.5991	0.127294	> 0.05	false	0.350722	4.89837	0.193137	> 0.05	false
orf19.209	DFG10	Ortholog(s) have role in dolichol biosynthetic process, dolichol-linked oligosaccharide biosynthetic process, polyprenol catabolic process, pseudohyphal growth and endoplasmic reticulum localization	0.565862	4.77576	0.0686958	> 0.05	false	0.58256	4.85893	0.0472526	> 0.05	false	0.392752	4.80603	0.189548	> 0.05	false	-0.227516	4.53066	0.408342	> 0.05	false
orf19.2090		Ortholog of S. cerevisiae Ecm16, an essential DEAH-box ATP-dependent RNA helicase specific to the U3 snoRNP required for 18S rRNA synthesis; Hap43-induced; Spider biofilm induced	2.28603	4.29661	2.96875e-08	5.57623e-07	true	2.54171	4.58375	2.3351e-10	5.05534e-09	true	3.74887	5.70316	2.15022e-21	1.06205e-19	true	-1.73086	7.40347	1.42152e-05	0.000276034	false
orf19.2091		Putative NADH dehydrogenase; repressed by nitric oxide, Hap43p-repressed	-0.0398877	7.6844	0.898562	> 0.05	false	0.0222079	7.78787	0.944062	> 0.05	false	-0.165546	7.7548	0.60144	> 0.05	false	-0.143023	7.81543	0.597749	> 0.05	false
orf19.2092		Putative peroxisomal cystathionine beta-lyase; Gcn4p-regulated	0.567075	7.84595	0.0810721	> 0.05	false	-0.220615	7.50083	0.451549	> 0.05	false	-0.567618	7.40923	0.0503728	> 0.05	false	0.145274	5.91514	0.612311	> 0.05	false
orf19.2093	RFA1	Putative DNA replication factor A; RNA abundance regulated by cell cycle, tyrosol and cell density	-1.74288	7.43652	4.11256e-06	4.08682e-05	false	-2.5397	7.35956	8.68539e-13	2.81137e-11	true	-2.07427	7.49741	1.63937e-08	1.20655e-07	true	-0.205654	7.51388	0.451221	> 0.05	false
orf19.2094	PDR6	Putative pleiotropic drug resistance regulatory protein 6; transcript regulated by Nrg1; induced by alpha pheromone in SpiderM medium	-0.393293	6.02181	0.168175	> 0.05	false	-0.566966	6.02052	0.041993	> 0.05	false	-0.865656	5.96569	0.00263944	0.00687223	false	-0.0813163	5.98326	0.74932	0.00687223	false
orf19.2095		Ortholog(s) have role in negative regulation of transcription from RNA polymerase II promoter in response to iron and cytosol, nucleus localization	-0.797541	8.32339	0.0121197	0.038909	false	-0.932058	8.34796	0.00328049	0.0102169	false	-1.16293	8.33125	0.000409735	0.00131541	false	-0.162202	8.01456	0.547868	0.00131541	false
orf19.2097		Predicted DNA-dependent ATPase/helicase; Spider biofilm induced	-0.331091	6.12063	0.280783	> 0.05	false	-0.826721	5.99148	0.00600722	0.017343	false	-0.657009	6.11517	0.0337455	> 0.05	false	0.226361	5.24414	0.392965	> 0.05	false
orf19.2098	ARO8	Aromatic transaminase of the Ehrlich fusel oil pathway of aromatic alcohol biosynthesis; Rim101 independent alkaline induction; protein abundance affected by URA3 expression in CAI-4 strain; Gcn4-regulated; stationary phase enriched	-0.00430666	9.65986	0.989865	> 0.05	false	-0.943143	9.33845	0.00385704	0.0117814	false	-0.934287	9.40014	0.00523661	0.0125468	false	0.110562	8.80394	0.775999	0.0125468	false
orf19.2099	HIR1	Component of the HIR complex, a nucleosome assembly factor involved in chromatin formation; involved in regulation of white-opaque switching frequency	-0.491947	7.12972	0.0827657	> 0.05	false	-0.654925	7.13613	0.017269	0.0426797	false	-1.02556	7.06166	0.000302741	0.000998852	false	0.216001	6.39007	0.41205	0.000998852	false
orf19.21		Ortholog(s) have role in ethanol metabolic process and mitochondrial inner membrane localization	0.00142332	2.82935	0.980277	> 0.05	false	0.216933	3.00952	0.655081	> 0.05	false	-0.295392	2.81897	0.60515	> 0.05	false	0.433067	2.04087	0.281783	> 0.05	false
orf19.210		Ortholog(s) have role in protein localization to bud neck and cellular bud neck, cytosol localization	0.234147	3.49028	0.527589	> 0.05	false	1.05455	4.06439	0.00312834	0.00981175	false	1.14068	4.17906	0.000688956	0.00207122	false	-0.0205167	3.24293	0.967438	0.00207122	false
orf19.2101		Ortholog(s) have protein anchor activity, role in protein insertion into ER membrane, retrograde vesicle-mediated transport, Golgi to ER and GET complex, mitochondrion localization	-0.129089	5.99369	0.670329	> 0.05	false	-0.52549	5.8888	0.0739192	> 0.05	false	-0.699151	5.87885	0.0194684	0.0394815	false	-0.0711835	6.15833	0.786023	0.0394815	false
orf19.2102	CKB1	Regulatory subunit of protein kinase CK2 (casein kinase II), beta subunit; null mutants are hypersensitive to caspofungin and hydrogen peroxide medium	-0.454651	4.69889	0.137906	> 0.05	false	-0.354587	4.81297	0.232911	> 0.05	false	-0.547569	4.78951	0.0736152	> 0.05	false	-0.55307	5.21306	0.0289076	> 0.05	false
orf19.2103		Ortholog of Candida albicans WO-1 : CAWG_03811	0	-2.15937	1	> 0.05	false	-5.12548e-15	-2.2195	1	> 0.05	false	0	-2.09868	1	> 0.05	false	0	-2.62874	1	> 0.05	false
orf19.2104		Ortholog(s) have chaperone binding activity, role in aerobic respiration, iron-sulfur cluster assembly and mitochondrion localization	0.394292	4.54072	0.229997	> 0.05	false	0.328085	4.57585	0.324846	> 0.05	false	-0.125893	4.39666	0.698391	> 0.05	false	0.133804	3.97308	0.662424	> 0.05	false
orf19.2105		Putative pre-mRNA-splicing factor; possibly an essential gene, disruptants not obtained by UAU1 method	0.253843	4.15182	0.503447	> 0.05	false	0.147013	4.16593	0.695884	> 0.05	false	0.259519	4.28634	0.47617	> 0.05	false	-0.528767	4.16235	0.0666491	> 0.05	false
orf19.2106		Putative protein of unknown function; Hap43p-repressed gene	-0.66603	5.40858	0.0254839	> 0.05	false	-0.939791	5.37836	0.00149209	0.00519272	false	-1.29854	5.32372	9.51349e-06	4.24889e-05	false	0.108915	4.66462	0.682589	4.24889e-05	false
orf19.2107	MUQ1	Putative choline phosphate cytidylyltransferase/phosphoethanolamine cytidylyltransferase; repressed in hyphae compared vs yeast; Hap43-repressed; flow model biofilm induced; Spider biofilm repressed	-1.76802	7.52791	6.62866e-08	1.13043e-06	false	-1.72005	7.61083	5.21042e-08	6.20412e-07	false	-1.77008	7.65834	9.99262e-08	6.40681e-07	false	-0.0107519	6.01553	0.968493	> 0.05	false
orf19.2107.1	STF2	Protein involved in ATP biosynthesis; repressed in hyphae; repressed by Efg1, Hap43; transcript upregulated in clinical isolates from HIV+ patients with oral candidiasis; rat catheter, flow model and Spider biofilm induced	0.0585724	10.2929	0.86409	> 0.05	false	0.479381	10.5955	0.180445	> 0.05	false	-0.37614	10.2186	0.30707	> 0.05	false	4.30663	6.32136	1.58094e-10	2.28511e-08	true
orf19.2108	SOD6	Copper- and zinc-containing superoxide dismutase; gene family includes SOD1, SOD4, SOD5, and SOD6; gene may contain an intron; Hap43-repressed; flow model and rat catheter biofilm induced	1.45112	5.22758	9.7636e-05	0.000632074	false	0.904633	4.92228	0.0114676	0.0300101	false	0.427478	4.68672	0.251615	> 0.05	false	1.63604	1.99771	0.00101615	0.00929451	false
orf19.211		Predicted homeodomain-like transcription factor; also has a metal-binding Ada DNA repair protein domain; Spider biofilm induced	0.84929	3.77962	0.0280446	> 0.05	false	0.987277	3.94392	0.00678812	0.0192364	false	0.38213	3.62692	0.27452	> 0.05	false	0.680374	3.24233	0.0717485	> 0.05	false
orf19.2110		Ortholog(s) have arginyltransferase activity, role in protein arginylation and cytosol, nucleus localization	0.276446	5.13447	0.371716	> 0.05	false	-0.150615	4.98729	0.642284	> 0.05	false	-0.730956	4.79785	0.0221486	0.0441251	false	0.304663	4.77052	0.246905	0.0441251	false
orf19.2111		Ortholog(s) have core RNA polymerase II binding transcription factor activity and role in transcription elongation from RNA polymerase II promoter, transcriptional start site selection at RNA polymerase II promoter	-0.555326	5.85633	0.0572032	> 0.05	false	-0.45396	5.97006	0.114569	> 0.05	false	-0.756016	5.90827	0.00963557	0.0214309	false	-0.250253	5.92783	0.32274	0.0214309	false
orf19.2111.2	RPL38	60S ribosomal ribosomal protein subunit; genes encoding cytoplasmic ribosomal subunits, translation factors, tRNA synthetases are downregulated upon phagocytosis by murine macrophage	-0.169593	8.82515	0.595332	> 0.05	false	-1.55066	8.40279	9.1435e-07	7.72736e-06	false	-0.903258	8.65618	0.00561927	0.0133464	false	-0.696128	9.8103	0.0140863	0.0133464	false
orf19.2112		snRNP U5 splicing factor component; involved in positioning the 3' splice site during the 2nd catalytic step of splicing; Spider biofilm induced	0.164716	4.3767	0.622404	> 0.05	false	0.371348	4.56243	0.245154	> 0.05	false	0.544867	4.72136	0.0716811	> 0.05	false	-0.383542	4.8053	0.145572	> 0.05	false
orf19.2113		Putative integral peroxisomal membrane protein; Hap43p-repressed gene	-0.610999	6.8102	0.0320616	> 0.05	false	-0.799159	6.81018	0.00394232	0.0120143	false	-1.00943	6.7956	0.000515578	0.00161327	false	-0.271405	6.59074	0.311654	0.00161327	false
orf19.2114		Predicted uricase; ortholog of S. pombe SPCC1223.09; Spider biofilm induced	-1.72089	6.22543	1.89456e-07	2.8522e-06	false	-1.71279	6.2982	4.21429e-09	6.69068e-08	false	-0.690804	6.67021	0.141944	> 0.05	false	0.140938	3.89562	0.631808	> 0.05	false
orf19.2115		Putative molybdopterin-converting factor; fungal-specific (no human or murine homolog)	0.829056	4.67794	0.0207849	> 0.05	false	0.781602	4.7214	0.0294236	> 0.05	false	1.81707	5.51024	1.26898e-07	7.98259e-07	false	-1.19865	7.35781	7.15835e-05	0.00105836	false
orf19.2116	NAT2	Putative N-terminal acetyltransferase; Hap43p-repressed gene; mutation confers hypersensitivity to toxic ergosterol analog	-0.717153	6.45249	0.0132794	0.0417873	false	-0.724375	6.52146	0.0119834	0.03114	false	-0.362408	6.7282	0.244052	> 0.05	false	-0.113266	6.89488	0.713142	> 0.05	false
orf19.2117	LEU5	Putative mitochondrial carrier protein; Hap43-repressed; rat catheter biofilm induced	1.26567	5.67383	8.72618e-06	7.82072e-05	false	1.22335	5.71788	1.65828e-05	9.81135e-05	false	0.81775	5.50443	0.0050706	0.0122237	false	-0.0983411	5.57193	0.702204	0.0122237	false
orf19.2119	NDT80	Ortholog of Ndt80; meiosis-specific transcription factor; activator of CDR1 induction by antifungal drugs; required for wild-type drug resistance and for Spider biofilm formation; transcript induced by antifungal drug treatment	-0.461703	6.05182	0.102423	> 0.05	false	0.149596	6.41424	0.585765	> 0.05	false	0.905806	6.91923	0.00213394	0.00571449	false	-0.797682	7.99159	0.0177267	0.00571449	false
orf19.212	VPS28	ESCRT I protein sorting complex subunit; involved in Rim8 processing and proteolytic activation of Rim101, which regulates pH response; role in echinocandin, azole sensitivity	0.240278	4.50835	0.487236	> 0.05	false	-0.0772285	4.41481	0.81284	> 0.05	false	-0.268109	4.38271	0.399879	> 0.05	false	0.0267459	3.91449	0.928744	> 0.05	false
orf19.2124		Predicted alcohol dehydrogenase; Spider biofilm induced	0.352772	6.36456	0.226887	> 0.05	false	0.615051	6.59035	0.0344831	> 0.05	false	0.260939	6.44471	0.377542	> 0.05	false	0.0675009	5.6307	0.803376	> 0.05	false
orf19.2125		Protein of unknown function; GlcNAc-induced protein; Spider biofilm induced; rat catheter biofilm repressed	3.13814	6.3511	1.21719e-21	1.96042e-19	true	4.84037	8.01355	1.47209e-36	6.54392e-34	true	5.12972	8.35035	1.88975e-36	4.06479e-34	true	0.671372	5.03246	0.0104973	> 0.05	false
orf19.2127	CST5	Scaffold protein for the mitogen-activated protein (MAP) kinase cascade that regulates mating; required for opaque mating or white biofilm formation in response to mating pheromone; induced in response to pheromone; Hap43p-repressed	-0.751211	3.8836	0.0937619	> 0.05	false	-0.0789408	4.24181	0.877683	> 0.05	false	-0.168271	4.25913	0.712946	> 0.05	false	0.148026	2.70055	0.681357	> 0.05	false
orf19.2128		Ortholog(s) have mitochondrion localization	-0.522934	4.93486	0.0855752	> 0.05	false	-0.497361	5.016	0.10418	> 0.05	false	-0.168382	5.22261	0.574492	> 0.05	false	-0.523641	5.70951	0.0409246	> 0.05	false
orf19.2129		Ortholog of S. cerevisiae Spo71; a meiosis-specific protein required for spore wall formation during sporulation in S. cerevisiae; possibly an essential gene, disruptants not obtained by UAU1 method	-0.39611	5.28043	0.172138	> 0.05	false	-0.501888	5.30629	0.081402	> 0.05	false	-0.530059	5.35426	0.0612661	> 0.05	false	-0.289048	4.96784	0.269619	> 0.05	false
orf19.213		Ortholog(s) have role in ubiquitin-dependent protein catabolic process and nucleus, proteasome regulatory particle, lid subcomplex, proteasome storage granule localization	-0.965624	8.05474	0.00214557	0.00904911	false	-0.891322	8.15266	0.00407886	0.012378	false	-1.36698	8.06165	2.38938e-05	9.85305e-05	false	0.326481	7.13115	0.233448	9.85305e-05	false
orf19.2131		Ortholog(s) have ubiquitin-protein ligase activity, role in protein ubiquitination, ubiquitin-dependent protein catabolic process via the multivesicular body sorting pathway and Golgi apparatus, endoplasmic reticulum localization	-0.741549	6.90358	0.00794652	0.0272289	false	-0.780316	6.96105	0.00424023	0.0127647	false	-1.16039	6.89093	4.67691e-05	0.000182053	false	0.492298	6.08524	0.0588749	0.000182053	false
orf19.2132		Ortholog of C. parapsilosis CDC317 : CPAR2_213740, Candida tenuis NRRL Y-1498 : CANTEDRAFT_92162, Debaryomyces hansenii CBS767 : DEHA2A01056g and Candida dubliniensis CD36 : CD36_65220	-1.22536	6.64988	0.000432056	0.00228647	false	-1.46229	6.65405	2.06067e-05	0.000118249	false	-1.78346	6.6343	3.94014e-07	2.29859e-06	false	0.555264	5.57936	0.0365406	> 0.05	false
orf19.2133	LIP4	Secreted lipase, member of a differentially expressed lipase gene family with possible roles in nutrition and/or in creating an acidic microenvironment; expressed more strongly during mucosal infections than during systemic infections	0	-2.15937	1	> 0.05	false	-5.12548e-15	-2.2195	1	> 0.05	false	0	-2.09868	1	> 0.05	false	0	-2.62874	1	> 0.05	false
orf19.2135	TSM1	Putative transcription initiation factor TFIID subunit; transcript is upregulated in clinical isolates from HIV+ patients with oral candidiasis; Nrg1-regulated	0.0595805	7.07322	0.833132	> 0.05	false	0.104318	7.16873	0.710636	> 0.05	false	-0.232393	7.06234	0.408724	> 0.05	false	0.136688	7.17868	0.614912	> 0.05	false
orf19.2137		Ortholog(s) have mitochondrion localization	-0.0302992	4.88084	0.929027	> 0.05	false	-0.149324	4.89413	0.616191	> 0.05	false	0.1136	5.08502	0.693079	> 0.05	false	-0.520073	4.892	0.0540715	> 0.05	false
orf19.2138	ILS1	Putative isoleucyl-tRNA synthetase, the target of drugs including the cyclic beta-amino acid icofungipen/PLD-118/BAY-10-8888 and mupirocin; protein present in exponential and stationary growth phase yeast cultures	-0.285669	9.6253	0.380262	> 0.05	false	-0.970317	9.42834	0.00314862	0.00986606	false	-0.909936	9.50768	0.00685309	0.0158944	false	-0.587381	9.91256	0.036718	0.0158944	false
orf19.2143		Ortholog(s) have role in endocytic recycling and cytosol, endosome, nucleus localization	1.04957	5.34692	0.00178902	0.00778253	false	1.27997	5.5796	0.000120861	0.00056774	false	2.14345	6.2953	4.05015e-10	3.82527e-09	true	-1.56491	7.3513	2.14449e-05	0.000384394	false
orf19.2146	HAT2	Putative Hat1-Hat2 histone acetyltransferase complex subunit; role in DNA damage repair and morphogenesis; mutations cause constitutive pseudohyphal growth, caspofungin sensitivity; rat catheter and Spider biofilm repressed	-1.24135	6.2102	1.81269e-05	0.000149777	false	-1.42203	6.22931	3.19562e-07	3.02247e-06	false	-1.53409	6.259	1.14913e-07	7.29059e-07	false	0.0609197	6.47221	0.826962	> 0.05	false
orf19.2149		Putative sulfate permease; S. cerevisiae ortholog YPR003C localizes to the endoplasmic reticulum; regulated by Sef1p-, Sfu1p-, and Hap43p	0.384754	7.24114	0.20182	> 0.05	false	-0.0190788	7.09885	0.951982	> 0.05	false	-0.634212	6.88383	0.0334282	> 0.05	false	0.622001	6.36616	0.025528	> 0.05	false
orf19.215		Component of a complex containing the Tor2p kinase; possible a role in regulation of cell growth; Spider biofilm induced	2.0561	7.10558	1.00568e-10	3.25051e-09	true	2.35228	7.4218	5.16525e-13	1.73949e-11	true	2.07666	7.25364	1.24995e-10	1.26092e-09	true	-0.237198	5.71629	0.380068	> 0.05	false
orf19.2150		Putative ortholog of mammalian electron transfer flavoprotein complex subunit ETF-alpha; Spider biofilm repressed	-0.122259	8.03009	0.696358	> 0.05	false	-0.508188	7.93027	0.0992756	> 0.05	false	-0.493385	7.9951	0.121368	> 0.05	false	-0.248042	8.32029	0.356423	> 0.05	false
orf19.2151	NAG6	Protein required for wild-type mouse virulence and wild-type cycloheximide resistance; putative GTP-binding motif; similar to S. cerevisiae Yor165Wp; in gene cluster that encodes enzymes of GlcNAc catabolism; no human or murine homolog	0.0629109	8.05608	0.838999	> 0.05	false	-0.0437911	8.07502	0.886378	> 0.05	false	-0.443904	7.95015	0.158549	> 0.05	false	0.159339	7.91791	0.559039	> 0.05	false
orf19.2154	HXK1	N-acetylglucosamine (GlcNAc) kinase; involved in GlcNAc utilization; required for wild-type hyphal growth and mouse virulence; GlcNAc-induced transcript; induced by alpha pheromone in SpiderM medium	-0.293797	5.61846	0.297989	> 0.05	false	-0.0783597	5.79166	0.783975	> 0.05	false	-0.0407256	5.86895	0.88752	> 0.05	false	0.0145947	5.5572	0.95792	> 0.05	false
orf19.2156	NAG1	Glucosamine-6-phosphate deaminase; required for normal hyphal growth and mouse virulence; converts glucosamine 6-P to fructose 6-P; reversible reaction in vitro; gene and protein is GlcNAc-induced; Spider biofilm induced	-0.400037	4.89654	0.213873	> 0.05	false	0.0349082	5.17302	0.906067	> 0.05	false	0.386135	5.42099	0.199586	> 0.05	false	0.576276	4.74192	0.0448234	> 0.05	false
orf19.2157	DAC1	N-acetylglucosamine-6-phosphate (GlcNAcP) deacetylase; N-acetylglucosamine utilization; required for wild-type hyphal growth and virulence in mouse systemic infection; gene and protein are GlcNAc-induced; Spider biofilm induced	-0.12905	5.19256	0.660725	> 0.05	false	-0.0742574	5.29079	0.804147	> 0.05	false	-0.300562	5.24308	0.297131	> 0.05	false	0.491285	4.24947	0.0896148	> 0.05	false
orf19.2158	NAG3	Putative MFS transporter; similar to Nag4; required for wild-type mouse virulence and cycloheximide resistance; in gene cluster that includes genes encoding enzymes of GlcNAc catabolism; Spider biofilm repressed	1.41258	2.64083	0.000955469	0.0046067	false	1.55616	2.82378	0.000262524	0.00112791	false	2.66891	3.75869	1.1126e-12	1.47785e-11	false	-0.673793	3.95427	0.0198164	> 0.05	false
orf19.216		Protein with a metallo-dependent phosphatase domain; ketoconazole-induced; upregulation correlates with clinical development of fluconazole resistance	1.58199	6.99967	7.55467e-08	1.27208e-06	false	1.67606	7.14379	7.40565e-09	1.09611e-07	false	1.39984	6.99686	1.6871e-06	8.75452e-06	false	-0.155244	5.57501	0.558346	8.75452e-06	false
orf19.216.1		Ortholog of C. parapsilosis CDC317 : CPAR2_806510, Candida tenuis NRRL Y-1498 : CANTEDRAFT_109089, Debaryomyces hansenii CBS767 : DEHA2B13508g and Pichia stipitis Pignal : PICST_59544	-0.238026	7.02708	0.400391	> 0.05	false	0.0740857	7.25133	0.796776	> 0.05	false	-0.106053	7.22022	0.712407	> 0.05	false	-0.0605517	7.03249	0.827852	> 0.05	false
orf19.2160	NAG4	Putative transporter; fungal-specific; similar to Nag3p and to S. cerevisiae Ypr156Cp and Ygr138Cp; required for wild-type mouse virulence and wild-type cycloheximide resistance; gene cluster encodes enzymes of GlcNAc catabolism	1.89425	1.63192	0.00268971	0.0110098	false	1.4787	1.40763	0.0130106	0.0334186	false	2.34294	2.09273	2.59396e-06	1.29079e-05	false	0.713667	-0.419525	0.348761	1.29079e-05	false
orf19.2163		Ortholog(s) have cytosol localization	-0.59046	7.46986	0.054942	> 0.05	false	-0.815523	7.45619	0.0050603	0.0149235	false	-1.10086	7.41781	0.000211576	0.000725919	false	-0.0359982	7.00232	0.894449	0.000725919	false
orf19.2164.1	MFA1	a-factor mating pheromone; produced in opaque MTLa cells; required for mating competence of MTLa cells, but not MTLalpha; induced by alpha-factor	7.09293	0.31446	1.15495e-07	1.88294e-06	false	7.47894	0.628501	1.17088e-07	1.26129e-06	false	6.1571	-0.31515	8.46719e-05	0.000315063	false	0	-2.62874	1	0.000315063	false
orf19.2165		Predicted hydrolase; induced by nitric oxide	2.02038	7.38907	5.82784e-11	1.943e-09	true	1.3913	6.982	9.0715e-06	5.77734e-05	false	0.647925	6.5432	0.0219611	0.0437909	false	0.0816499	5.2485	0.791618	0.0437909	false
orf19.2166	VMA5	Putative vacuolar H(+)-ATPase; plasma membrane localized; rat catheter biofilm repressed	-0.341762	7.55935	0.264671	> 0.05	false	-0.333282	7.63544	0.265549	> 0.05	false	-0.859935	7.48389	0.00385618	0.00963033	false	0.152587	6.83312	0.570654	0.00963033	false
orf19.2167		Ortholog(s) have role in ribosomal large subunit biogenesis, ribosomal small subunit biogenesis and cytosolic large ribosomal subunit, nucleolus localization	1.44036	3.8728	0.00133844	0.00609611	false	1.90372	4.29724	1.09117e-05	6.84472e-05	false	3.35867	5.57722	9.68838e-17	2.34066e-15	true	-1.74565	6.90992	3.06276e-06	8.58086e-05	false
orf19.2168		Putative sterol deacetylase; flow model biofilm induced; rat catheter biofilm repressed	2.03433	3.86533	1.51334e-06	1.71615e-05	false	2.88769	4.64697	3.37809e-13	1.16876e-11	true	2.67868	4.52407	1.0418e-10	1.07037e-09	true	1.97531	1.63376	0.000124117	0.00162916	false
orf19.2168.3		Ortholog(s) have role in cellular protein localization, endoplasmic reticulum inheritance, endoplasmic reticulum tubular network organization and nuclear pore complex assembly, more	-0.452025	7.86865	0.148925	> 0.05	false	-0.627397	7.86934	0.0382069	> 0.05	false	-0.62623	7.92854	0.048236	> 0.05	false	-0.0374651	8.24412	0.891112	> 0.05	false
orf19.2169		Ortholog of C. parapsilosis CDC317 : CPAR2_805720, Lodderomyces elongisporus NRLL YB-4239 : LELG_02628, Candida dubliniensis CD36 : CD36_22330 and Candida orthopsilosis Co 90-125 : CORT0C03440	2.95422	0.226554	0.000989813	0.00475167	false	2.37041	-0.106636	0.0215018	> 0.05	false	3.49823	0.766465	1.4385e-05	6.2285e-05	false	4.34596	-0.544254	1.69242e-05	0.000318787	false
orf19.217		Ortholog(s) have sequence-specific DNA binding activity	4.12761	1.8115	6.31311e-08	1.09057e-06	false	4.33071	2.07425	7.41368e-09	1.09611e-07	false	5.44702	3.10664	3.08429e-21	1.469e-19	false	1.66564	0.517896	0.00383128	0.0270339	false
orf19.2170	PHM7	Putative transporter; fungal-specific; Hog1-repressed; repressed by 17-beta-estradiol, ethynyl estradiol; Hap43-induced; Spider biofilm induced	0.977856	8.41262	0.00995302	0.0329855	false	0.81807	8.38133	0.0294175	> 0.05	false	1.11789	8.63831	0.00417123	0.0103014	false	-0.709285	8.77921	0.0165099	0.0103014	false
orf19.2172	ARA1	D-Arabinose dehydrogenase; dehydro-D-arabinono-1,4-lactone synthesis; active on D-arabinose, L-fucose, L-xylose, L-galactose; inhibited by metal ions, thiol group-specific reagents; induced on polystyrene adherence; Spider biofilm induced	-2.51526	8.22683	2.66653e-14	1.53279e-12	true	-1.66379	8.46253	1.75316e-07	1.77122e-06	false	-2.33889	8.38556	7.67206e-12	9.13524e-11	true	1.27216	6.01064	4.0806e-05	0.000663645	false
orf19.2173	MAF1	Putative negative regulator of RNA polymerase III; decreased expression in hyphae vs yeast cells; caspofungin repressed; Spider biofilm repressed	-1.17438	7.25029	0.000179576	0.00107972	false	-1.45836	7.24028	3.72844e-07	3.44816e-06	false	-2.51081	7.08347	7.39078e-17	1.82525e-15	true	0.856243	5.00984	0.00260762	0.0198716	false
orf19.2174	RAD57	Putative DNA recombination and repair protein; induced by interaction with macrophage; transcript is regulated by Nrg1, Mig1, and Tup1; essential protein; S. cerevisiae ortholog is essential	-0.727636	4.99693	0.0249364	> 0.05	false	-0.870595	5.01355	0.00414317	0.0125275	false	-0.492582	5.22088	0.0932425	> 0.05	false	0.498337	4.28646	0.0818997	> 0.05	false
orf19.2175		Putative mitochondrial cell death effector; induced by nitric oxide; Spider biofilm induced; rat catheter biofilm repressed	-0.604003	5.82618	0.118482	> 0.05	false	-0.380354	5.99077	0.326733	> 0.05	false	-0.396222	6.04272	0.319598	> 0.05	false	-0.434856	5.4775	0.104033	> 0.05	false
orf19.2176	IFM3	Protein with a 2-hydroxyacid dehydrogenase catalytic domain; Hap43-repressed; Plc1-regulated; overlaps orf19.2177	0.396824	3.99838	0.275745	> 0.05	false	0.275671	4.00241	0.461309	> 0.05	false	0.121019	3.97933	0.71968	> 0.05	false	-0.30279	3.42743	0.358251	> 0.05	false
orf19.2177		Sef1p-, Sfu1p-, and Hap43p-regulated gene; overlaps IFM3/orf19.2176	0	-2.15937	1	> 0.05	false	-5.12548e-15	-2.2195	1	> 0.05	false	0	-2.09868	1	> 0.05	false	0	-2.62874	1	> 0.05	false
orf19.2178	MRS4	Mitochondrial carrier family member, involved in iron homeostasis; putative membrane transporter localized to the mitochondrial membrane; transcription under control of Atf2p; regulated by Sef1p, Sfu1p, and Hap43p	0.00256348	6.39801	0.998108	> 0.05	false	0.0561768	6.4975	0.848915	> 0.05	false	-0.127426	6.4651	0.655014	> 0.05	false	-0.455581	6.96583	0.0985304	> 0.05	false
orf19.2178.1		Protein of unknown function; Spider biofilm induced	0.0984389	3.79668	0.781568	> 0.05	false	0.0296362	3.83186	0.92729	> 0.05	false	-0.120614	3.81781	0.780303	> 0.05	false	0.156941	3.51216	0.60974	> 0.05	false
orf19.2179	SIT1	Transporter of ferrichrome siderophores, not ferrioxamine B; required for human epithelial cell invasion in vitro, not for mouse systemic infection; regulated by iron, Sfu1, Rfg1, Tup1, Hap43; rat catheter and Spider biofilm induced	-0.528647	6.84724	0.246639	> 0.05	false	-0.712817	6.84593	0.114069	> 0.05	false	-0.267688	7.09192	0.571533	> 0.05	false	-1.18903	8.15532	5.78659e-05	0.000899417	false
orf19.2179.2	RPS10	Ribosomal protein S10; downregulated in the presence of human whole blood or PMNs; Spider biofilm repressed	-0.308952	9.46498	0.350715	> 0.05	false	-1.45475	9.13205	1.07672e-05	6.76677e-05	false	-0.791437	9.4001	0.0202827	0.0408843	false	-0.721738	10.661	0.00956908	0.0408843	false
orf19.218	BUD20	Protein similar to S. cerevisiae Bud20p, which affects bud site selection; transposon mutation affects filamentous growth	7.01262	0.249399	2.55986e-07	3.75146e-06	false	6.64319	-0.0475029	7.79186e-06	5.02964e-05	false	7.84804	1.03634	3.06525e-10	2.93665e-09	false	1.89746	-0.628681	0.0198662	> 0.05	false
orf19.2180		Ortholog(s) have calcium ion binding, zinc ion binding activity, role in axial cellular bud site selection, bipolar cellular bud site selection, regulation of COPII vesicle coating and cellular bud neck, cytosol, nucleus localization	0.122517	5.1278	0.707206	> 0.05	false	0.572722	5.45309	0.0549916	> 0.05	false	0.46191	5.44584	0.120783	> 0.05	false	-0.104593	5.9812	0.709519	> 0.05	false
orf19.2181		Protein of unknown function; overlaps orf19.2180	0	-2.15937	1	> 0.05	false	-5.12548e-15	-2.2195	1	> 0.05	false	0	-2.09868	1	> 0.05	false	0	-2.62874	1	> 0.05	false
orf19.2182	BLM3	Putative proteasome activator; binds core proteasome and stimulates proteasome-mediated protein degradation by inducing gate opening; ortholog of S. cerevisiae Blm10; transcript regulated by Nrg1 and Mig1	-1.16938	8.42939	0.000323356	0.00178193	false	-1.14532	8.50915	0.000407375	0.00167877	false	-1.23987	8.53908	0.00021423	0.00073331	false	-0.0507181	7.81733	0.859412	0.00073331	false
orf19.2183	KRE30	YEF3-subfamily ABC family protein; predicted not to be a transporter; repressed in core stress response; mutation confers hypersensitivity to amphotericin B	-0.0245101	6.97209	0.939295	> 0.05	false	0.116597	7.11626	0.71861	> 0.05	false	1.03118	7.72247	0.00562638	0.0133464	false	-1.22752	9.547	9.6591e-05	0.00133902	false
orf19.2184		Putative fumarylacetoacetate hydrolase; clade-associated gene expression; rat catheter and Spider biofilm repressed	0.300492	5.5935	0.293919	> 0.05	false	0.25339	5.64013	0.370045	> 0.05	false	-0.137692	5.49835	0.650927	> 0.05	false	0.217083	5.58618	0.412004	> 0.05	false
orf19.2185	NSA1	Putative 66S pre-ribosomal particles conmponent; Hap43-induced; repressed by prostaglandins	1.90505	2.94912	1.27427e-05	0.000110063	false	2.2451	3.29898	3.37439e-07	3.16462e-06	false	3.83557	4.72649	2.14407e-21	1.06205e-19	true	-2.30229	6.64721	1.22683e-06	4.61592e-05	true
orf19.2186	SEH1	Ortholog(s) have Seh1-associated complex, cytosol, fungal-type vacuole membrane, nuclear membrane, nuclear pore outer ring localization	0.0424204	6.35115	0.880649	> 0.05	false	-0.505467	6.17003	0.0669821	> 0.05	false	-0.927912	6.06819	0.00119816	0.00340405	false	-0.0332667	5.94995	0.899966	0.00340405	false
orf19.2187	ALG7	Protein involved in cell wall mannan biosynthesis; mutation confers hypersensitivity to tunicamycin; transcript elevated in chk1, nik1, and sln1 homozygous null mutants; possibly essential gene, disruptants not obtained by UAU1 method	-0.459645	6.32785	0.108498	> 0.05	false	-1.05102	6.17744	0.000241636	0.00104557	false	-1.38606	6.13498	3.16362e-06	1.55453e-05	false	0.023721	6.35383	0.930933	1.55453e-05	false
orf19.2190	VRP1	Verprolin-related protein involved in actin cytoskeleton organization and polarized morphogenesis; interacts with Wal1p and Myo5p; downregulated upon adherence to polystyrene	-0.415842	6.89374	0.135352	> 0.05	false	-0.376014	6.98315	0.167171	> 0.05	false	-0.549501	6.96881	0.0491416	> 0.05	false	0.37417	6.16147	0.161177	> 0.05	false
orf19.2191		Ortholog(s) have role in endocytic recycling, peptidyl-diphthamide biosynthetic process from peptidyl-histidine and cytosol, endosome, nucleus localization	0.514106	3.69777	0.156676	> 0.05	false	0.296588	3.64538	0.426387	> 0.05	false	0.876404	4.05348	0.00862353	0.0194657	false	-1.12736	4.87186	0.000144668	0.00182726	false
orf19.2191.1		Ortholog of C. parapsilosis CDC317 : CPAR2_104195, Candida tenuis NRRL Y-1498 : CANTEDRAFT_109454, Debaryomyces hansenii CBS767 : DEHA2C10076g and Candida orthopsilosis Co 90-125 : CORT0B05420	0.552833	3.90642	0.128582	> 0.05	false	0.35475	3.8637	0.350461	> 0.05	false	0.822631	4.20499	0.0144964	0.0305409	false	-0.611486	4.92302	0.0235159	0.0305409	false
orf19.2192	GDH2	Putative NAD-specific glutamate dehydrogenase; fungal-specific; transcript regulated by Nrg1, Mig1, Tup1, and Gcn4; stationary phase enriched protein; flow model biofilm induced; Spider biofilm induced	-0.277669	9.43218	0.436201	> 0.05	false	0.422201	9.86365	0.279521	> 0.05	false	-0.332461	9.53889	0.437403	> 0.05	false	0.835754	9.05853	0.00583418	0.0375505	false
orf19.2193	PRS5	Putative 5-phospho-ribosyl-1(alpha)-pyrophosphate synthetase; Hap43-induced; repressed during core stress response	0.772554	5.30563	0.0194607	> 0.05	false	0.859279	5.4342	0.00854677	0.0233661	false	1.35299	5.82935	5.55974e-05	0.000214167	false	-1.19188	7.08279	0.000102337	0.00140408	false
orf19.2194		Phosphorylated protein of unknown function	0.0426019	5.63663	0.885688	> 0.05	false	-0.0421967	5.666	0.87897	> 0.05	false	-0.308761	5.59913	0.293362	> 0.05	false	0.177917	5.15682	0.481474	> 0.05	false
orf19.2195		Ortholog of Candida albicans WO-1 : CAWG_05881	0	-2.15937	1	> 0.05	false	-5.12548e-15	-2.2195	1	> 0.05	false	0	-2.09868	1	> 0.05	false	0	-2.62874	1	> 0.05	false
orf19.2196		Ortholog(s) have ubiquitin binding activity and cytoplasm localization	0.943254	4.60624	0.0048483	0.0181011	false	0.652655	4.49554	0.0564859	> 0.05	false	0.695074	4.57869	0.033757	> 0.05	false	0.174441	4.84405	0.513311	> 0.05	false
orf19.2197		Has domain(s) with predicted N,N-dimethylaniline monooxygenase activity, NADP binding, flavin adenine dinucleotide binding activity and role in oxidation-reduction process	5.49764	1.03657	2.83436e-10	8.18161e-09	false	5.91734	1.48396	5.13632e-11	1.21882e-09	false	7.25192	2.74958	2.38824e-20	9.89117e-19	false	2.94042	-0.170247	7.33341e-05	0.00107945	false
orf19.2198	FLC3	Protein involved in heme uptake; putative FAD transporter, similar to S. cerevisiae Flc3p	-0.0478826	6.28212	0.874483	> 0.05	false	-0.0465567	6.35485	0.873566	> 0.05	false	0.131034	6.50423	0.684742	> 0.05	false	-0.593473	6.60966	0.0384434	> 0.05	false
orf19.2199	PHO86	Putative endoplasmic reticulum protein; possibly adherence-induced	-0.740607	6.82556	0.0615538	> 0.05	false	-1.31859	6.70501	0.000846781	0.00320269	false	-1.4352	6.73149	0.000345962	0.00112851	false	-1.45503	6.10637	8.22619e-05	0.00118475	false
orf19.22		Protein with homology to peroxisomal membrane proteins; Sef1p-, Sfu1p-, and Hap43p-regulated gene	1.61995	5.48581	2.10225e-06	2.27193e-05	false	1.75147	5.66078	1.42296e-07	1.48254e-06	false	1.67061	5.65587	9.23253e-07	5.06687e-06	false	0.264974	5.3154	0.293678	5.06687e-06	false
orf19.22.1		Pseudogene; added to Assembly 21 based on comparative genome analysis	2.32134	1.36592	8.26791e-05	0.000548016	false	2.7911	1.80397	4.07168e-05	0.000216896	false	4.40882	3.30594	2.74762e-18	8.52145e-17	false	4.84809	-0.160784	3.08887e-07	1.5217e-05	false
orf19.220	PIR1	1,3-beta-glucan-linked cell wall protein; N-mannosylated, O-glycosylated by Pmt1; cell wall defect in het mutant; Hog1/fluconazole/hypoxia induced; iron/Efg1/Plc1/temp regulated; flow model biofilm induced; hyphal, Spider biofilm repressed	0.462318	9.03377	0.176216	> 0.05	false	0.27892	9.00295	0.426053	> 0.05	false	-0.0793214	8.87605	0.830205	> 0.05	false	-0.764767	6.23848	0.0196846	> 0.05	false
orf19.2200		Protein of unknown function; rat catheter biofilm repressed	-0.148152	6.21683	0.597654	> 0.05	false	-0.016492	6.3532	0.955392	> 0.05	false	-0.0763646	6.38235	0.78933	> 0.05	false	-0.340355	6.74091	0.205545	> 0.05	false
orf19.2201		Ortholog(s) have ribosome binding activity, role in mitochondrial respiratory chain complex III assembly, positive regulation of mitochondrial translation and mitochondrial ribosome localization	-0.351055	4.04627	0.323393	> 0.05	false	0.0843955	4.3274	0.82447	> 0.05	false	0.402756	4.55985	0.220247	> 0.05	false	-0.330461	5.49723	0.190154	> 0.05	false
orf19.2202		Protein of unknown function; induced by alpha pheromone in SpiderM medium	1.08742	2.13783	0.0345884	> 0.05	false	0.574802	1.88882	0.317924	> 0.05	false	1.44401	2.51209	0.00348773	0.00883594	false	0.219402	1.03379	0.685156	0.00883594	false
orf19.2203		Ortholog of Candida albicans WO-1 : CAWG_05873	1.8534	-0.261494	0.0312053	> 0.05	false	1.17153	-0.587984	0.301749	> 0.05	false	2.02532	-0.0267427	0.0191698	0.0389234	false	4.10717	-2.03976	0.139783	0.0389234	false
orf19.2203.1		Protein of unknown function; ORF added to Assembly 21 based on comparative genome analysis; overlaps dubious orf19.2203	0.171564	1.81801	0.739617	> 0.05	false	0.446832	2.039	0.332734	> 0.05	false	0.369135	2.05307	0.405298	> 0.05	false	0.979705	1.80775	0.0128504	> 0.05	false
orf19.2204		Predicted membrane protein of unknown function; Spider biofilm induced	0.643815	4.90025	0.0310801	> 0.05	false	1.23891	5.36473	2.39093e-05	0.000135568	false	1.09094	5.32023	0.000161041	0.000567259	false	0.312646	4.06714	0.277123	0.000567259	false
orf19.2204.2		Ortholog(s) have GTPase activity and role in establishment or maintenance of actin cytoskeleton polarity, regulation of alpha-glucan biosynthetic process	0.266989	4.68457	0.433558	> 0.05	false	0.516163	4.89948	0.11622	> 0.05	false	0.530354	4.96611	0.105243	> 0.05	false	0.413273	5.29291	0.122998	> 0.05	false
orf19.2208		Ortholog(s) have role in response to salt stress and cytoplasm localization	0.0570395	7.38777	0.853726	> 0.05	false	0.391956	7.64101	0.199204	> 0.05	false	0.484525	7.75288	0.12994	> 0.05	false	-0.158752	8.09907	0.568949	> 0.05	false
orf19.2209	YVC1	Putative vacuolar cation channel shock; repressed by alpha pheromone in SpiderM medium; flow model biofilm repressed	0.372931	7.33224	0.194107	> 0.05	false	-0.195529	7.11123	0.47919	> 0.05	false	0.365628	7.45927	0.212076	> 0.05	false	0.28199	7.91919	0.299683	> 0.05	false
orf19.2210		Protein of unknown function; Spider biofilm induced	0.978681	5.47741	0.000643825	0.0032597	false	1.23098	5.72292	1.18697e-05	7.36936e-05	false	1.677	6.10639	9.03019e-09	6.96108e-08	false	0.363978	4.54834	0.192378	> 0.05	false
orf19.2211		Ortholog of C. parapsilosis CDC317 : CPAR2_103660, Debaryomyces hansenii CBS767 : DEHA2F19756g, Candida dubliniensis CD36 : CD36_21990 and Pichia stipitis Pignal : PICST_61375	3.82299	0.41211	2.40817e-05	0.000193933	false	4.09989	0.727189	1.67308e-05	9.89014e-05	false	5.14863	1.65449	3.31979e-11	3.67104e-10	false	0.970826	-1.30965	0.433338	> 0.05	false
orf19.2212		Ortholog of Debaryomyces hansenii CBS767 : DEHA2F19734g, Candida dubliniensis CD36 : CD36_21980, Candida tropicalis MYA-3404 : CTRG_01709 and Candida albicans WO-1 : CAWG_05866	0.126336	1.69618	0.778868	> 0.05	false	0.227356	1.81507	0.645597	> 0.05	false	0.0118125	1.77025	1	> 0.05	false	0.440869	2.29056	0.224521	> 0.05	false
orf19.2213		Ortholog(s) have cytoplasm, nucleus localization	0.961199	3.93395	0.012588	0.0400463	false	0.943491	3.99747	0.0121461	0.0314569	false	1.32629	4.31739	0.000149965	0.000533031	false	0.220893	4.23327	0.440458	0.000533031	false
orf19.2214		Ortholog(s) have structural constituent of ribosome activity and mitochondrial large ribosomal subunit localization	-0.338102	5.47931	0.232779	> 0.05	false	-0.0535928	5.6845	0.847445	> 0.05	false	0.776107	6.21058	0.00631164	0.0147567	false	-0.624961	6.96946	0.0214505	0.0147567	false
orf19.2215	GLE1	Putative nucleoporin; moderately induced at 42 degrees C	0.385914	5.67175	0.164007	> 0.05	false	0.400642	5.75278	0.146131	> 0.05	false	0.362895	5.78977	0.195317	> 0.05	false	-0.424127	5.8516	0.105597	> 0.05	false
orf19.2216	PDS5	Putative protein with a predicted role in establishment and maintenance of sister chromatid condensation and cohesion; cell-cycle regulated periodic mRNA expression	-0.677893	5.59737	0.0201918	> 0.05	false	-1.05822	5.53174	0.000422201	0.00173032	false	-0.407378	5.8393	0.172335	> 0.05	false	-0.0692782	6.38892	0.799714	> 0.05	false
orf19.2219	ORF298	Predicted ORF in retrotransposon Tca3; similar to Gag-Pol; a-specific transcript, alpha-factor induced; rat catheter biofilm repressed; mRNA binds She3	-0.98739	7.51228	0.0026533	0.0108808	false	-1.15114	7.53136	0.000297248	0.00126487	false	-1.46383	7.50004	8.27642e-06	3.75168e-05	false	0.255696	6.49779	0.344425	3.75168e-05	false
orf19.2220		Protein of unknown function; Hap43-repressed gene; by Rgt1; repressed in Spider biofilms by Bcr1, Tec1, Brg1, Rob1 and induced by Efg1, Ndt80; Spider biofilm induced	-5.52543	3.7057	8.40463e-06	7.61441e-05	false	-6.07206	3.75266	1.59727e-06	1.2585e-05	false	-5.26279	3.83654	1.29022e-05	5.63034e-05	false	0.978565	-1.5333	0.545214	5.63034e-05	false
orf19.2222		Putative casein kinase; plasma membrane-localized	-0.400105	6.55042	0.153933	> 0.05	false	-0.427424	6.61064	0.125571	> 0.05	false	-0.494524	6.6411	0.089788	> 0.05	false	-0.0204311	6.53269	0.941766	> 0.05	false
orf19.2227		Protein of unknown function; flow model biofilm induced; nitric oxide-repressed	-0.0443011	3.43111	0.953408	> 0.05	false	-0.374316	3.34371	0.428002	> 0.05	false	-0.311948	3.43599	0.451968	> 0.05	false	-0.344475	4.04789	0.296674	> 0.05	false
orf19.2228		Ortholog(s) have actin monomer binding activity, role in sequestering of actin monomers and mating projection tip localization	-0.302442	5.88007	0.291509	> 0.05	false	-0.574484	5.83538	0.0432272	> 0.05	false	-0.752449	5.82537	0.00874768	0.0196793	false	0.0914805	5.55583	0.729765	0.0196793	false
orf19.2229		Ortholog(s) have ubiquitin-protein ligase activity, role in protein ubiquitination, response to ethanol and cytoplasm, nucleus localization	-0.173159	4.76784	0.575082	> 0.05	false	-0.0417811	4.90293	0.884656	> 0.05	false	-0.208772	4.88196	0.518834	> 0.05	false	-0.240742	4.27306	0.419763	> 0.05	false
orf19.223		Putative serine/threonine protein kinase; Hap43-repressed; induced by prostaglandins; possibly an essential gene, disruptants not obtained by UAU1 method; flow model biofilm induced; Spider biofilm induced	-1.2994	7.53692	0.000323012	0.00178151	false	-1.13711	7.65778	0.0024183	0.00792782	false	-1.13321	7.71787	0.00252591	0.00661279	false	0.382962	6.49942	0.170028	0.00661279	false
orf19.2230		Putative pre-mRNA-splicing factor; decreased transcription is observed upon benomyl treatment	-0.825332	4.00675	0.0208556	> 0.05	false	-0.994438	4.01327	0.00556532	0.0162619	false	-0.881597	4.11436	0.00766397	0.0175251	false	-0.414898	3.71771	0.164285	0.0175251	false
orf19.2231		Protein of unknown function; Spider biofilm induced	2.71101	5.50702	1.83152e-17	1.62835e-15	true	2.18967	5.14591	2.36611e-12	6.95032e-11	true	1.96439	5.02328	3.17003e-09	2.6465e-08	false	0.222274	5.87267	0.3753	> 0.05	false
orf19.2232	RPL11	Ribosomal protein; repressed by phagocytosis; colony morphology-related gene regulation by Ssn6; Hap43-induced; Spider biofilm repressed	0.148079	9.33319	0.656415	> 0.05	false	-1.36397	8.80283	3.61787e-05	0.000194391	false	-0.588314	9.12387	0.089627	> 0.05	false	-0.722415	10.5173	0.00762954	0.0458975	false
orf19.2233	PRE2	Putative proteasome beta-5 subunit; macrophage-induced protein	-1.07833	8.18678	0.000660909	0.00333606	false	-1.25518	8.20436	6.28361e-05	0.000315981	false	-1.63433	8.16094	6.23168e-07	3.53332e-06	false	0.00442951	7.66556	0.98772	3.53332e-06	false
orf19.2236	FHL1	Fork-head transcription factor; forms a heterodimer with Ifh1 that is tethered to promoters by Tbf1; positively regulates rRNA and ribosomal protein gene transcription	1.29116	5.51413	1.37258e-05	0.00011764	false	1.28962	5.58709	1.87988e-05	0.000109381	false	1.66543	5.91995	1.85063e-08	1.35307e-07	false	-0.654696	6.7903	0.0413453	> 0.05	false
orf19.2237	SPR1	Putative GPI-anchored protein; similar but not orthologous to S. cerevisiae Spr1, a sporulation-specific exo-1,3-beta-glucanase; mutant is viable	3.01934	0.788374	0.000149826	0.000918235	false	2.80113	0.706403	0.000563757	0.00223758	false	4.12162	1.84823	2.33546e-11	2.62169e-10	false	0.743728	-1.04042	0.509073	> 0.05	false
orf19.2237.1		Ortholog of Slx9 required for pre-rRNA processing; associated with 90S pre-ribosome and 43S small ribosomal subunit precursor, interacts with U3 snoRNA in S. cerevisiae; gene has intron; Spider biofilm induced	1.53599	2.52573	0.00307234	0.0122673	false	1.84169	2.83113	0.000170151	0.00076972	false	2.84149	3.68314	8.53543e-11	8.92612e-10	false	-1.48637	5.05943	8.22647e-05	0.00118475	false
orf19.2238	LTE1	Protein similar to GDP/GTP exchange factors; repressed by alpha pheromone in SpiderM medium; flow model biofilm repressed	0.0704552	5.23137	0.839757	> 0.05	false	-0.0873827	5.22412	0.785983	> 0.05	false	0.785702	5.77383	0.0141265	0.0299021	false	0.337101	6.68372	0.262782	0.0299021	false
orf19.2241	PST1	Putative 1,4-benzoquinone reductase; hyphal-induced; regulated by Cyr1, Ras1, Efg1, Nrg1, Rfg1, Tup1; Hap43-induced; Spider biofilm induced	-1.77572	7.02209	2.01845e-08	3.88988e-07	false	-2.20701	7.00624	3.85001e-12	1.09709e-10	true	-2.3238	7.04542	7.32923e-13	1.01183e-11	true	1.0317	6.56475	0.000246107	0.00288408	false
orf19.2242	PRB1	Endoprotease B; regulated by heat, carbon source (GlcNAc-induced), nitrogen, macrophage response, human neutrophils; similar to (does not replace) S. cerevisiae vacuolar B protease Prb1p; flow model biofilm induced; Spider biofilm induced	0.276798	7.80665	0.37817	> 0.05	false	0.547987	8.03421	0.0752049	> 0.05	false	0.0818632	7.83417	0.796361	> 0.05	false	0.912472	5.22581	0.00239633	0.0185799	false
orf19.2244		Similar to oxidoreductases and to S. cerevisiae Yjr096wp; Sfu1 repressed; induced by benomyl treatment, Ssr1; Hap43-repressed; flow model biofilm repressed	-2.25547	8.29399	4.67192e-10	1.2511e-08	true	-2.13896	8.38702	2.96392e-09	4.95323e-08	true	-2.93049	8.32814	9.2477e-14	1.47874e-12	true	1.00696	5.59541	0.000117109	0.00156177	false
orf19.2245	YPT72	Vacuolar Rab small monomeric GTPase involved in vacuolar biogenesis; involved in filamentous growth and virulence	-0.0832981	6.27306	0.769648	> 0.05	false	-0.0767115	6.34842	0.78357	> 0.05	false	-0.436961	6.24222	0.128799	> 0.05	false	-0.00705234	5.98315	0.980983	> 0.05	false
orf19.2246		Ortholog(s) have cytosol, nucleus localization	0.0568041	6.35648	0.842112	> 0.05	false	-0.23365	6.28735	0.399167	> 0.05	false	-0.138727	6.3907	0.626457	> 0.05	false	-0.334845	6.81612	0.214795	> 0.05	false
orf19.2247		Ortholog of C. parapsilosis CDC317 : CPAR2_406700, Candida tenuis NRRL Y-1498 : CANTEDRAFT_127772, Candida dubliniensis CD36 : CD36_21220 and Candida orthopsilosis Co 90-125 : CORT0C06120	1.81553	2.40361	6.52534e-05	0.000451828	false	1.73912	2.42131	0.000650824	0.00253635	false	2.55977	3.13142	6.28358e-10	5.7712e-09	false	-0.520821	1.44347	0.24233	> 0.05	false
orf19.2248	ARE2	Acyl CoA:sterol acyltransferase; uses cholesterol and oleoyl-CoA substrates; protoberberine derivative drug inhibits enzyme activity; ketoconazole-induced; Hap43-repressed; flow model biofilm induced; Spider biofilm induced	-1.77432	8.00256	7.98067e-08	1.33706e-06	false	-1.92447	8.04188	4.28247e-09	6.78278e-08	false	-2.38173	8.01653	7.51061e-12	8.98971e-11	true	0.513616	6.5474	0.0778146	> 0.05	false
orf19.2249		Putative metalloprotease of the mitochondrial inner membrane; expression downregulated in an ssr1 null mutant	-0.448278	4.62051	0.155143	> 0.05	false	-0.574105	4.63778	0.0673686	> 0.05	false	-0.108133	4.9056	0.719796	> 0.05	false	-0.259601	5.51048	0.333483	> 0.05	false
orf19.225		Predicted 2-hydroxyacid dehydrogenase; Hap43-repressed gene	-0.899462	6.60312	0.00294634	0.0118444	false	-0.542272	6.81043	0.0647857	> 0.05	false	-0.713775	6.80165	0.0201334	0.0406243	false	0.027597	6.15309	0.917138	0.0406243	false
orf19.2250	SPE3	Putative spermidine synthase; predicted role in pantothenate and spermidine biosynthesis; Spider biofilm repressed	0.20132	7.19929	0.497827	> 0.05	false	-1.10373	6.71617	0.000115003	0.000545794	false	-0.192742	7.13257	0.504312	> 0.05	false	-0.652975	8.27899	0.0196652	> 0.05	false
orf19.2251	AAH1	Adenine deaminase; purine salvage and nitrogen catabolism; colony morphology-related regulation by Ssn6; Hog1, CO2-induced; chlamydospore formation repressed in C. albicans and C. dubliniensis; rat catheter and F-12/CO2 biofilm induced	-2.08346	4.90659	0.000142082	0.000878855	true	-1.85662	5.02014	0.000906296	0.00339439	false	-0.440124	5.52501	0.436324	> 0.05	false	-1.5384	6.00133	0.00011459	0.00153431	false
orf19.2252		Protein of unknown function; rat catheter biofilm repressed	4.62637	1.54201	3.02855e-10	8.59336e-09	false	4.50524	1.52779	3.64825e-08	4.49938e-07	false	6.065	2.97811	2.3203e-19	8.22967e-18	false	1.95474	-0.81862	0.027012	> 0.05	false
orf19.2253		Protein of unknown function; expression regulated by white-opaque switch; repressed by alpha pheromone in SpiderM medium; Spider biofilm induced	1.60597	2.61753	0.00560461	0.0204888	false	1.82942	2.8618	0.000980834	0.00362539	false	2.55094	3.4821	2.12034e-06	1.07763e-05	false	-0.509161	2.04125	0.206428	1.07763e-05	false
orf19.2256		Ortholog(s) have cytosol, nucleus localization	0.48995	5.45999	0.0904428	> 0.05	false	0.313493	5.43191	0.284184	> 0.05	false	0.358028	5.51545	0.243584	> 0.05	false	-0.846753	6.01178	0.00168908	0.0139911	false
orf19.2257		Predicted ER protein involved in ER-nucleus signaling; Spider biofilm repressed	-1.00265	8.25838	0.00142927	0.00644381	false	-1.26195	8.24919	5.72124e-05	0.000290025	false	-1.27235	8.30492	8.43419e-05	0.00031401	false	-0.138193	8.5105	0.610764	0.00031401	false
orf19.2258		Ortholog of C. parapsilosis CDC317 : CPAR2_406650, Candida tenuis NRRL Y-1498 : CANTEDRAFT_130046, Debaryomyces hansenii CBS767 : DEHA2F24134g and Candida dubliniensis CD36 : CD36_21310	-0.340593	3.56954	0.391725	> 0.05	false	0.0153869	3.81144	1	> 0.05	false	0.299675	4.02118	0.434406	> 0.05	false	-0.107686	3.90629	0.725935	> 0.05	false
orf19.2259		Ortholog(s) have structural constituent of ribosome activity and mitochondrial large ribosomal subunit localization	-0.55705	5.53826	0.0493421	> 0.05	false	-0.304543	5.71806	0.289418	> 0.05	false	0.327891	6.09595	0.250135	> 0.05	false	-0.443639	6.69626	0.0972844	> 0.05	false
orf19.2260		Putative transcription factor with zinc finger DNA-binding motif	0.292658	4.77824	0.332882	> 0.05	false	0.178039	4.78811	0.551708	> 0.05	false	0.154543	4.83408	0.613476	> 0.05	false	-0.449361	5.65742	0.091333	> 0.05	false
orf19.2261		Ortholog(s) have RNA binding activity, role in mRNA splicing, via spliceosome and U2 snRNP, U2-type prespliceosome, cytosol localization	-0.81205	5.35266	0.0440004	> 0.05	false	-1.30509	5.26194	0.00142685	0.00498649	false	-1.54624	5.25645	0.000268683	0.000898484	false	0.806341	6.15074	0.00354075	0.0253595	false
orf19.2262		Protein similar to quinone oxidoreductases; induced by benomyl treatment, nitric oxide; oxidative stress-induced via Cap1; stationary-phase enriched protein; Spider biofilm induced	1.60524	5.83791	1.95154e-07	2.91115e-06	false	1.46701	5.80799	1.60127e-05	9.51629e-05	false	1.02758	5.55814	0.00106182	0.0030571	false	0.943777	3.92037	0.00486529	0.0325067	false
orf19.2263		Ortholog of C. parapsilosis CDC317 : CPAR2_406560, Candida tenuis NRRL Y-1498 : CANTEDRAFT_103408, Debaryomyces hansenii CBS767 : DEHA2F24024g and Candida dubliniensis CD36 : CD36_21360	0.552974	5.17017	0.054278	> 0.05	false	0.415651	5.16265	0.151318	> 0.05	false	0.248404	5.12726	0.389834	> 0.05	false	0.13999	5.10981	0.605825	> 0.05	false
orf19.2264	OLE2	Protein with similarity to fatty acid desaturase (stearoyl-CoA desaturase); homozygous null mutant shows decreased production of prostaglandin E2	0.0574956	5.70774	0.845437	> 0.05	false	0.231842	5.87193	0.427533	> 0.05	false	0.773969	6.24836	0.00986979	0.0218716	false	-0.706193	6.04998	0.0100668	0.0218716	false
orf19.2265		Ortholog(s) have role in positive regulation of transcription from RNA polymerase II promoter in response to amino acid starvation and SWI/SNF complex localization	-0.522904	7.08817	0.060919	> 0.05	false	-0.560125	7.14509	0.0422299	> 0.05	false	-0.561054	7.20346	0.0500985	> 0.05	false	0.0789432	7.24473	0.771052	> 0.05	false
orf19.2266		Ortholog(s) have ATPase activity, DNA binding, nucleosome binding activity, role in chromatin remodeling and ISW1 complex localization	-0.820371	5.05954	0.0146896	0.0454526	false	-0.94359	5.08509	0.00463178	0.0138125	false	-0.247916	5.42693	0.44247	> 0.05	false	-1.01214	5.52726	0.000226533	0.00268776	false
orf19.2267	RFA2	Putative DNA replication factor A; RNA abundance regulated by cell cycle, tyrosol and cell density	-0.775293	5.64067	0.00984184	0.0326816	false	-1.33746	5.52646	6.17624e-06	4.11148e-05	false	-0.930128	5.71523	0.00196923	0.00531183	false	-0.132612	6.44874	0.620502	0.00531183	false
orf19.2268	RCK2	Predicted MAP kinase-activated protein kinase, similar to S. cerevisiae serine/threonine protein kinase Rck2p; induced by osmotic stress via Hog1p; macrophage/pseudohyphal-repressed; mutants are sensitive to rapamycin	-1.48032	8.17987	1.65119e-05	0.000137799	false	-1.20157	8.33125	0.000444882	0.00181436	false	-1.46084	8.31603	3.48219e-05	0.000139204	false	-0.207856	7.63877	0.443206	0.000139204	false
orf19.2269		Putative 3-phosphoserine phosphatase; induced by benomyl or in azole-resistant strain that overexpresses MDR1; early-stage flow model biofilm induced; Spider biofilm repressed	-0.315979	8.11497	0.321051	> 0.05	false	-0.506027	8.1057	0.107073	> 0.05	false	-0.978895	7.98709	0.00280308	0.00724175	false	0.625063	7.6238	0.0352076	0.00724175	false
orf19.227	COX7	Putative cytochrome c oxidase; flucytosine induced; repressed by nitric oxide	-0.449436	8.51454	0.172487	> 0.05	false	-0.315553	8.6452	0.320109	> 0.05	false	-0.592681	8.58675	0.0705342	> 0.05	false	-0.0263467	8.39478	0.923574	> 0.05	false
orf19.2270	SMF12	Ortholog of S. cerevisiae Smf1; manganese transporter; Gcn4-regulated; Hap43, alkaline induced; caspofungin repressed; mutants are viable	0.167361	7.34608	0.651333	> 0.05	false	-0.118406	7.27371	0.706991	> 0.05	false	0.544421	7.68908	0.124661	> 0.05	false	-0.368289	7.43254	0.367611	> 0.05	false
orf19.2272	AFT2	Putative Aft domain transcription factor; role in colony morphology and virulence; functionally complements S. cerevisiae aft1 mutant growth defect; Spider biofilm induced	-0.500639	6.10011	0.0735843	> 0.05	false	-0.207649	6.30126	0.445223	> 0.05	false	-0.286818	6.32381	0.310231	> 0.05	false	0.0925519	5.93102	0.720795	> 0.05	false
orf19.2274		Ortholog of Candida dubliniensis CD36 : CD36_21450, Candida tropicalis MYA-3404 : CTRG_01739 and Candida albicans WO-1 : CAWG_05814	0.575023	3.06799	0.157086	> 0.05	false	0.892773	3.3405	0.022848	> 0.05	false	1.18496	3.59352	0.000683824	0.0020595	false	0.364666	3.22906	0.250933	0.0020595	false
orf19.2275		Putative mitochondrial ribosomal protein; predicted role in aerobic respiration; Spider biofilm repressed	-0.459529	6.26207	0.141399	> 0.05	false	-0.0154174	6.53889	0.955744	> 0.05	false	0.477578	6.86454	0.123041	> 0.05	false	-0.462823	7.85639	0.0882909	> 0.05	false
orf19.2276		Ortholog(s) have DNA-directed RNA polymerase activity, RNA-directed RNA polymerase activity	-0.0418941	5.9424	0.884334	> 0.05	false	-0.294815	5.89461	0.285902	> 0.05	false	-0.372197	5.91929	0.188287	> 0.05	false	-0.0322786	6.21947	0.902255	> 0.05	false
orf19.2277	TPK2	cAMP-dependent protein kinase catalytic subunit; isoform of Tpk1; needed for epithelial cell damage, engulfment and oral (not systemic) virulence in mice; control of morphogenesis and stress response; rat catheter, Spider biofilm repressed	-0.665999	8.46441	0.0349013	> 0.05	false	-0.873583	8.45991	0.00510221	0.0150272	false	-0.908074	8.50653	0.00510192	0.0122903	false	0.374357	7.50938	0.174922	0.0122903	false
orf19.2278		Putative 20S proteasome assembly protein; filament induced; induced by alpha pheromone in SpiderM medium	-1.44101	7.26809	1.18315e-06	1.38895e-05	false	-1.6777	7.27956	6.0888e-09	9.35486e-08	false	-1.64372	7.34696	2.20934e-08	1.58748e-07	false	0.242603	7.22722	0.374408	> 0.05	false
orf19.2280	ZCF10	Putative transcription factor with zinc cluster DNA-binding motif	-0.840911	5.54386	0.00285663	0.0115723	false	-0.566764	5.72016	0.0393196	> 0.05	false	-0.67467	5.73668	0.0174384	0.0358887	false	0.279356	4.62678	0.30173	0.0358887	false
orf19.2281		Has domain(s) with predicted CoA-transferase activity and role in ketone body catabolic process	1.12736	3.47685	0.00414519	0.0157854	false	1.14013	3.5597	0.00613835	0.0176663	false	1.51007	3.87991	3.97493e-05	0.000157112	false	-0.18691	3.22155	0.550445	0.000157112	false
orf19.2282		Has domain(s) with predicted catechol 1,2-dioxygenase activity, ferric iron binding activity and role in catechol-containing compound metabolic process, oxidation-reduction process	0.994239	2.97021	0.0221002	> 0.05	false	0.778491	2.90574	0.0713315	> 0.05	false	0.761427	2.9479	0.0558977	> 0.05	false	0.856976	1.59455	0.0508856	> 0.05	false
orf19.2283	DQD1	Putative 3-dehydroquinate dehydratase; ketoconazole-repressed; protein abundance downregulated by macrophages; flow model biofilm induced	-0.0838932	7.92723	0.810058	> 0.05	false	-0.988643	7.62918	0.00312616	0.00980951	false	-1.53108	7.52762	7.40301e-06	3.38105e-05	false	0.334621	6.7368	0.252446	3.38105e-05	false
orf19.2284		Protein with an FMN-binding domain; Hap43-repressed; flow model biofilm induced	0.646539	7.49868	0.0507096	> 0.05	false	-0.321538	7.05993	0.284579	> 0.05	false	-0.991936	6.85742	0.0014569	0.00405283	false	0.328776	5.49446	0.237379	0.00405283	false
orf19.2285		Protein of unknown function; transcription induced by benomyl treatment	2.18708	2.98476	5.33659e-07	7.06263e-06	false	2.47242	3.29668	3.03045e-08	3.81265e-07	false	2.82443	3.65057	1.4797e-12	1.94225e-11	false	1.22356	1.59152	0.0092699	> 0.05	false
orf19.2286		Putative deoxyhypusine hydroxylase; ketoconazole-induced; protein level decreases in stationary phase cultures; required for biofilm formation; Spider biofilm repressed	-0.756048	7.3021	0.0265127	> 0.05	false	-1.30425	7.19321	0.000111435	0.000531126	false	-0.995019	7.34852	0.00416683	0.0102943	false	-0.495958	8.10038	0.0715494	0.0102943	false
orf19.2287	RPA12	Putative DNA-directed RNA polymerase I; induced upon adherence to polystyrene	1.29024	2.0495	0.0109613	0.035706	false	1.5745	2.32981	0.000721793	0.00277882	false	2.59018	3.17482	9.98076e-10	8.87356e-09	false	-1.35078	5.25517	3.63389e-06	9.69255e-05	false
orf19.2288	CCT5	T-complex protein 1, epsilon subunit; protein present in exponential and stationary growth phase yeast cultures; Spider biofilm repressed	-0.538894	8.01043	0.0809922	> 0.05	false	-0.82316	7.9733	0.00690343	0.0195299	false	-0.707216	8.07509	0.0260263	> 0.05	false	-0.260048	8.60166	0.335985	> 0.05	false
orf19.2289	ARP3	Protein with Myo5p-dependent localization to cortical actin patches at hyphal tip; mutation confers hypersensitivity to cytochalasin D; Spider biofilm repressed	-0.0250584	8.76358	0.941204	> 0.05	false	-0.108196	8.79551	0.735336	> 0.05	false	0.192262	9.00657	0.563363	> 0.05	false	0.145893	7.82292	0.603333	> 0.05	false
orf19.229		Ortholog(s) have ubiquitin-protein ligase activity, role in protein ubiquitination involved in ubiquitin-dependent protein catabolic process and chromosome, centromeric region, nucleus, spindle pole body localization	-0.111015	5.74027	0.727328	> 0.05	false	-0.011354	5.86123	0.981881	> 0.05	false	-0.186024	5.83538	0.557506	> 0.05	false	0.363783	5.47003	0.159592	> 0.05	false
orf19.2290	TOR1	Protein similar to TOR family phosphatidylinositol kinases; mutation confers resistance to rapamycin; involved in regulation of ribosome biogenesis, starvation response, and adhesion	-0.19688	8.12574	0.526143	> 0.05	false	-0.247837	8.17464	0.419081	> 0.05	false	-0.623956	8.07313	0.0489832	> 0.05	false	0.0307175	7.77192	0.912513	> 0.05	false
orf19.2296		Predicted mucin-like protein; ketoconazole-induced; fluconazole-repressed; induced in cyr1 mutant; colony morphology-related gene regulation by Ssn6; flow model biofilm induced; Spider biofilm induced	-2.20636	10.3599	1.1602e-09	2.8547e-08	true	-2.20787	10.4321	8.1916e-10	1.55175e-08	true	-3.07817	10.3694	1.20554e-15	2.45077e-14	true	0.521625	8.58765	0.0799452	> 0.05	false
orf19.2297	ARL3	Putative Ras superfamily GTPase; induced by nitric oxide independent of Yhb1p	-0.00148203	5.4413	1	> 0.05	false	0.290995	5.66777	0.299586	> 0.05	false	-0.0426256	5.55168	0.888941	> 0.05	false	0.27729	5.48117	0.282265	> 0.05	false
orf19.2298	WBP1	Putative oligosaccharyltransferase subunit; Spider biofilm repressed	-0.117451	8.24173	0.706251	> 0.05	false	-0.510356	8.13874	0.100023	> 0.05	false	-0.840714	8.06994	0.00860359	0.0194339	false	-0.0864606	8.36667	0.747741	0.0194339	false
orf19.2299		Ortholog(s) have protein tag activity and role in cell budding, cellular response to oxidative stress, invasive growth in response to glucose limitation, protein urmylation, tRNA wobble position uridine thiolation	0.461701	4.37684	0.159313	> 0.05	false	0.0533482	4.22491	0.895247	> 0.05	false	0.259511	4.39332	0.418622	> 0.05	false	-0.714078	5.32974	0.0055805	0.0361621	false
orf19.23	RTA3	Similar to S. cerevisiae Rta1 (role in 7-aminocholesterol resistance) and Rsb1 (flippase); putative drug-responsive regulatory site; induced by fluphenazine, estradiol, ketoconazole, caspofungin; rat catheter biofilm induced	0.807643	5.13116	0.00772607	0.0265965	false	2.15379	6.18826	2.9162e-13	1.02885e-11	true	1.80485	5.96885	1.06136e-08	8.09745e-08	false	-1.07374	4.02271	0.00212751	0.0167885	false
orf19.230		Ortholog of S. cerevisiae Pet111; a mitochondrial translational activator specific for the COX2 mRNA; Hap43-induced gene	0.902441	4.40996	0.00890129	0.0298711	false	1.43932	4.85524	1.634e-05	9.6849e-05	false	1.63135	5.05379	7.5819e-07	4.23064e-06	false	0.0621443	5.13464	0.825785	4.23064e-06	false
orf19.2301		Ortholog(s) have role in proteasome regulatory particle assembly and cytosol, nucleus localization	-0.404372	5.75444	0.179709	> 0.05	false	-0.582231	5.75118	0.0493143	> 0.05	false	-1.26056	5.57288	5.62992e-05	0.000216496	false	0.406672	4.90744	0.120072	0.000216496	false
orf19.2302		Ortholog(s) have enzyme regulator activity, role in cellular calcium ion homeostasis and integral to endoplasmic reticulum membrane localization	-1.07881	5.1723	0.000311222	0.00172792	false	-0.564211	5.4315	0.0979134	> 0.05	false	-0.23293	5.63508	0.423406	> 0.05	false	-0.252833	4.75952	0.332183	> 0.05	false
orf19.2303	FGR16	Protein lacking an ortholog in S. cerevisiae; transposon mutation affects filamentous growth; fluconazole-downregulated	-0.323509	3.19559	0.447016	> 0.05	false	-0.384481	3.23537	0.359987	> 0.05	false	0.405805	3.69888	0.238836	> 0.05	false	-0.021918	4.24427	0.948133	> 0.05	false
orf19.2304		Protein similar to S. cerevisiae Gvp36p; transposon mutation affects filamentous growth	-0.432924	7.00654	0.120832	> 0.05	false	-0.306677	7.13398	0.262791	> 0.05	false	-0.406977	7.1486	0.147917	> 0.05	false	-0.158635	7.35469	0.55235	> 0.05	false
orf19.2305		Ortholog(s) have tubulin binding activity, role in tubulin complex assembly and prefoldin complex localization	-0.26261	4.40372	0.429976	> 0.05	false	-0.286006	4.46339	0.38711	> 0.05	false	-0.16285	4.581	0.619851	> 0.05	false	-0.140576	5.30984	0.578991	> 0.05	false
orf19.2306		Ortholog(s) have oxidoreductase activity, acting on single donors with incorporation of molecular oxygen, incorporation of two atoms of oxygen activity and role in L-methionine salvage from methylthioadenosine	0.188711	5.61593	0.498302	> 0.05	false	0.338965	5.77064	0.216622	> 0.05	false	0.243632	5.77652	0.383471	> 0.05	false	-0.210455	5.59738	0.417237	> 0.05	false
orf19.2307		Ortholog(s) have role in mRNA cleavage, mRNA polyadenylation, mitotic sister chromatid segregation, regulation of G1/S transition of mitotic cell cycle and cytosol, mRNA cleavage and polyadenylation specificity factor complex localization	0.0950714	5.7854	0.742539	> 0.05	false	0.0795119	5.84957	0.783219	> 0.05	false	-0.239281	5.75228	0.404086	> 0.05	false	-0.372029	6.13736	0.151117	> 0.05	false
orf19.2308		Putative 6-phosphofructo-2-kinase; catalyzes synthesis of fructose-2,6-bisphosphate; Hap43-repressed; flow model, rat catheter and Spider biofilm induced	-0.422361	7.11724	0.13425	> 0.05	false	-0.321651	7.23345	0.270604	> 0.05	false	0.201341	7.54862	0.509837	> 0.05	false	-0.0279946	6.50155	0.928929	> 0.05	false
orf19.2309	PET127	Protein with a predicted role in 5'-end processing of mitochondrial RNAs; ortholog of S. cerevisiae Pet127; Hap43-induced; rat catheter and Spider biofilm induced	1.29052	4.21013	0.00130299	0.00595091	false	1.47683	4.41919	0.00018632	0.000834935	false	2.20089	5.036	1.45133e-08	1.08249e-07	true	-1.53739	6.43937	1.90431e-05	0.000347888	false
orf19.2309.2	RPL2	Putative 60S ribosomal protein L2; Hap43-induced gene; repressed in infected rabbit kidney in SC5314, but not NGY152, strain background; Spider biofilm repressed	-0.276334	11.0181	0.411524	> 0.05	false	-1.71721	10.6051	4.44507e-07	4.06024e-06	false	-1.04479	10.8509	0.00320346	0.00815916	false	-0.709947	11.9374	0.0099079	0.00815916	false
orf19.231	APL2	Phosphorylated protein of unknown function; mutation confers hypersensitivity to toxic ergosterol analog	-0.173671	7.13422	0.561227	> 0.05	false	-0.266728	7.16336	0.358809	> 0.05	false	-0.179124	7.2627	0.544158	> 0.05	false	0.177836	7.28595	0.510824	> 0.05	false
orf19.2310		Predicted single-stranded nucleic acid binding protein; flow model biofilm induced	3.7851	1.37983	1.86982e-08	3.63497e-07	false	2.89361	0.741899	5.72395e-05	0.000290025	false	4.32108	2.00213	5.84009e-13	8.25036e-12	false	-0.339692	2.13371	0.383487	> 0.05	false
orf19.2310.1	RPL29	Ribosomal protein L29; induced upon germ tube formation; colony morphology-related gene regulation by Ssn6; intron in 5'-UTR; Spider biofilm repressed	-0.286008	8.66638	0.365749	> 0.05	false	-1.51189	8.30761	1.57218e-06	1.24801e-05	false	-1.0252	8.50965	0.00163783	0.00449611	false	-0.721232	9.52826	0.0102411	0.00449611	false
orf19.2311	RPL82	Predicted ribosomal protein; genes encoding cytoplasmic ribosomal subunits, translation factors, and tRNA synthetases are downregulated upon phagocytosis by murine macrophage	-0.654175	6.99919	0.020055	> 0.05	false	-0.784136	7.02186	0.00549409	0.0160748	false	0.161613	7.50423	0.600089	> 0.05	false	-0.844015	9.16295	0.00343081	0.0249473	false
orf19.2312		Protein similar to ferric reductase Fre10p; possibly an essential gene, disruptants not obtained by UAU1 method	0	-2.15937	1	> 0.05	false	-5.12548e-15	-2.2195	1	> 0.05	false	0	-2.09868	1	> 0.05	false	0	-2.62874	1	> 0.05	false
orf19.2313		Putative ortholog of S. cerevisiae Pex32 a peroxisomal integral membrane protein with a role in negative regulation of peroxisome size; Hap43-repressed gene	0.501431	5.7989	0.117003	> 0.05	false	0.855162	6.08928	0.00384555	0.0117517	false	0.478398	5.91631	0.118758	> 0.05	false	0.53637	5.29917	0.0428051	> 0.05	false
orf19.2314		Protein with a role in nucleolar integrity and processing of pre-rRNA; mutation confers hypersensitivity to 5-fluorocytosine (5-FC), 5-fluorouracil (5-FU), and tubercidin (7-deazaadenosine); Hap43-induced; Spider biofilm induced	1.91325	2.59695	0.000569828	0.00293406	false	2.46845	3.11829	3.4931e-06	2.49914e-05	false	3.94852	4.45039	2.79091e-16	6.39512e-15	true	-1.7956	6.22704	2.14412e-06	6.58846e-05	false
orf19.2315		Putative transcription factor with bZIP DNA-binding motif	0.196692	5.66893	0.485203	> 0.05	false	0.441633	5.87781	0.110631	> 0.05	false	0.357002	5.88788	0.206865	> 0.05	false	-0.0945712	6.36302	0.731937	> 0.05	false
orf19.2317		Protein of unknown function; induced by alpha pheromone in SpiderM medium	4.34813	0.839299	3.36982e-07	4.73051e-06	false	4.75088	1.27527	1.69852e-07	1.72648e-06	false	5.69692	2.14737	6.45135e-15	1.17534e-13	false	0.828413	0.154142	0.162754	> 0.05	false
orf19.2318.1		Ortholog(s) have inositol phosphoceramide synthase regulator activity, role in inositolphosphoceramide metabolic process and inositol phosphoceramide synthase complex, integral to Golgi membrane localization	0.0626923	4.90887	0.831942	> 0.05	false	-0.0684994	4.91456	0.828878	> 0.05	false	0.257833	5.14313	0.364455	> 0.05	false	-0.598574	6.16734	0.0243027	> 0.05	false
orf19.2319		Putative nucleolar protein with a predicted role in pre-rRNA processing; Hap43-induced gene; repressed in core stress response	1.00508	4.64798	0.00468442	0.017558	false	1.32672	4.94522	9.47689e-05	0.000460247	false	2.41358	5.84874	5.01305e-12	6.19019e-11	true	-1.69628	7.44891	6.80988e-06	0.00015658	false
orf19.232		RNA polymerase II mediator complex subunit; possibly an essential gene, disruptants not obtained by UAU1 method	0.160718	3.78493	0.655198	> 0.05	false	0.105449	3.82684	0.780793	> 0.05	false	0.674544	4.2101	0.0475993	> 0.05	false	0.258023	4.35944	0.354298	> 0.05	false
orf19.2320		Putative serine/threonine-protein kinase; possibly an essential gene, disruptants not obtained by UAU1 method	1.25088	3.50931	0.00166672	0.00731164	false	1.8469	4.02459	1.50288e-06	1.19871e-05	false	2.91684	4.95713	1.19027e-17	3.27963e-16	true	-1.39566	6.54071	7.1045e-05	0.00105492	false
orf19.2322.3	ERP5	Protein involved in ER to Golgi transport; rat catheter and Spider biofilm repressed	-0.251403	7.78363	0.418315	> 0.05	false	-0.693079	7.67051	0.0240036	> 0.05	false	-0.78139	7.69608	0.0136126	0.0289627	false	0.332327	8.31753	0.225085	0.0289627	false
orf19.2324	UBA4	Putative ubiquitin activating protein; Hap43-repressed; induced by prostaglandins; clade-associated gene expression	-1.07398	6.06596	0.00593845	0.021497	false	-1.44845	6.02613	0.000220763	0.000966544	false	-1.26889	6.13641	0.001363	0.00381868	false	-0.420399	5.78409	0.131797	0.00381868	false
orf19.2325		Ortholog(s) have RNA polymerase III type 1 promoter sequence-specific DNA binding and RNA polymerase III type 1 promoter sequence-specific DNA binding TFIIIB recruiting transcription factor activity, more	0.603438	4.52854	0.0665608	> 0.05	false	0.533795	4.56014	0.111254	> 0.05	false	0.168672	4.41183	0.61291	> 0.05	false	0.0801748	4.63452	0.773757	> 0.05	false
orf19.2326		Ortholog(s) have role in chromatin silencing at silent mating-type cassette, double-strand break repair via homologous recombination, intra-S DNA damage checkpoint, mitotic sister chromatid cohesion and nucleus localization	0.349434	5.00388	0.236227	> 0.05	false	0.527428	5.17928	0.0719153	> 0.05	false	0.575021	5.26586	0.0477849	> 0.05	false	-0.347031	5.78619	0.180396	> 0.05	false
orf19.2328		Ortholog of C. parapsilosis CDC317 : CPAR2_210530, Candida tenuis NRRL Y-1498 : CANTEDRAFT_105553, Debaryomyces hansenii CBS767 : DEHA2G14432g and Candida dubliniensis CD36 : CD36_10220	0.178745	6.21764	0.53315	> 0.05	false	-0.0411547	6.17709	0.889962	> 0.05	false	-0.188987	6.1645	0.516943	> 0.05	false	0.247475	6.77124	0.363034	> 0.05	false
orf19.2329.1	RPS17B	Ribosomal protein 17B; downregulated upon phagocytosis by murine macrophages; Hap43-induced; Spider biofilm repressed	-0.394351	10.2543	0.237843	> 0.05	false	-1.98706	9.83476	5.41741e-09	8.40077e-08	false	-1.44345	10.0207	3.22879e-05	0.000130167	false	-0.666867	10.8925	0.0172164	0.000130167	false
orf19.233.1	HRT1	Ortholog of S. cerevisiae Hrt1; component of a nuclear ubiquitin-protein ligase complex involved in cell cycle control; induced by hydroxyurea; Spider biofilm induced	-0.359054	6.0645	0.204066	> 0.05	false	-0.383304	6.1257	0.161682	> 0.05	false	-0.402629	6.17619	0.156611	> 0.05	false	-0.149297	6.4329	0.575747	> 0.05	false
orf19.2330		Putative U3 snoRNA-associated protein; Hap43-induced; transposon mutation affects filamentous growth; repressed by prostaglandins	0.934666	4.28936	0.00601274	0.0217424	false	1.11942	4.48744	0.000603908	0.00237433	false	2.06841	5.25128	4.38205e-11	4.72044e-10	true	-1.24893	7.24356	0.0002598	0.00302858	false
orf19.2331	ADA2	Zinc finger and homeodomain transcriptional coactivator; role in cell wall integrity and in sensitivity to caspofungin; required for the normal transcriptional response to caspofungin; required for yeast cell adherence to silicone substrate	-0.700707	5.72181	0.0143562	0.0447113	false	-0.801383	5.75495	0.00414451	0.0125275	false	-0.954733	5.75986	0.000725871	0.00217533	false	0.0911731	6.14708	0.723418	0.00217533	false
orf19.2332		Ortholog of C. parapsilosis CDC317 : CPAR2_210560, Candida dubliniensis CD36 : CD36_10180, Candida orthopsilosis Co 90-125 : CORT0A09890 and Candida tropicalis MYA-3404 : CTRG_04072	2.00055	0.91535	0.00229117	0.00954847	false	1.61572	0.730467	0.0248423	> 0.05	false	2.88635	1.73346	1.88485e-07	1.14988e-06	false	0.246375	0.437615	0.697504	> 0.05	false
orf19.2333		Ortholog(s) have role in retrograde transport, endosome to Golgi and cytosol, late endosome, nucleus localization	-1.13313	7.56275	0.000298211	0.0016626	false	-1.0848	7.65016	0.000582181	0.00229975	false	-1.0412	7.72316	0.00119901	0.00340501	false	-0.0127333	7.36368	0.965919	0.00340501	false
orf19.2334	BIG1	Endoplasmic reticulum (ER) protein; ortholog of S. cerevisiae Big1; required for beta-1,6-glucan synthesis, filamentation, adhesion, and virulence; rat catheter biofilm repressed	-0.464437	5.64696	0.184419	> 0.05	false	-0.54545	5.6848	0.110642	> 0.05	false	-0.878081	5.6172	0.0134834	0.0287427	false	0.22442	5.30717	0.375359	0.0287427	false
orf19.2335		Putative aspartyl aminopeptidase; stationary phase enriched protein; mutation confers hypersensitivity to 5-fluorouracil (5-FU); Hog1-induced; planktonic growth-induced; rat catheter and Spider biofilm repressed	-1.41694	7.87099	3.29071e-05	0.000256038	false	-1.60804	7.89331	2.87635e-06	2.11695e-05	false	-1.82615	7.90123	2.25482e-07	1.36064e-06	false	0.0431749	7.06354	0.874625	> 0.05	false
orf19.2336		Pry family pathogenesis-related protein; predicted to be extracellular	1.30936	2.19183	0.00642052	0.0229925	false	0.768666	1.91556	0.0951098	> 0.05	false	1.35169	2.36025	0.00134311	0.00376772	false	0.140642	0.754364	0.808693	0.00376772	false
orf19.2337	ALP1	Cystine transporter; present in pathogenic yeasts (no human or murine homolog); Spider biofilm induced	2.61405	6.94564	1.65547e-12	6.94257e-11	true	2.92333	7.28848	2.8418e-14	1.16252e-12	true	2.85046	7.28475	1.18125e-11	1.38672e-10	true	-1.61578	6.0165	6.5505e-10	7.94158e-08	false
orf19.234	PHA2	Putative prephenate dehydratase; Hap43p-repressed gene; expression downregulated in an ssr1 null mutant	-0.71975	3.93288	0.0501334	> 0.05	false	-1.04423	3.88185	0.00712988	0.0200599	false	-0.480661	4.15887	0.149847	> 0.05	false	-0.0341439	4.89417	0.89989	> 0.05	false
orf19.2340	CDC48	Putative microsomal ATPase; plasma membrane-localized; regulated by Gcn2 and Gcn4; induced by amino acid starvation (3-AT); macrophage/pseudohyphal-repressed; protein levels decrease in stationary phase yeast; Spider biofilm repressed	-0.853714	11.0261	0.0110839	0.0360174	false	-0.856697	11.0977	0.0100222	0.0268386	false	-1.56753	10.9413	9.03051e-06	4.04946e-05	false	0.327066	10.4367	0.229647	4.04946e-05	false
orf19.2341	HNT1	Protein with similarity to protein kinase C inhibitor-I; protein level decreases in stationary phase cultures	-0.759377	6.89663	0.0075993	0.0262007	false	-0.430544	7.10015	0.120233	> 0.05	false	-0.872225	6.98656	0.00217517	0.00581558	false	0.49668	6.81753	0.0682415	0.00581558	false
orf19.2342	SFT2	Putative membrane protein; transcript regulated by Mig1; Spider biofilm induced	-0.188745	4.7644	0.564766	> 0.05	false	-0.239307	4.81138	0.454076	> 0.05	false	-0.573445	4.72468	0.0789148	> 0.05	false	-0.159104	4.01343	0.603076	> 0.05	false
orf19.2343	VPS23	ESCRT I protein sorting complex protein; involved in proteolytic activation of Rim101, which regulates pH response; ortholog of S. cerevisiae Stp22/Vps23	-0.418511	4.91293	0.160437	> 0.05	false	-0.100634	5.13001	0.744534	> 0.05	false	-0.315234	5.08878	0.274253	> 0.05	false	0.107025	5.16963	0.682547	> 0.05	false
orf19.2343.1		Putative vacuolar H+ ATPase subunit e of the V-ATPase V0 subcomplex; added to Assembly 21 based on comparative genome analysis	-0.254812	5.58164	0.385648	> 0.05	false	-0.0487197	5.75167	0.874702	> 0.05	false	-0.440767	5.6298	0.143235	> 0.05	false	0.0375425	5.41643	0.884272	> 0.05	false
orf19.2344	ASR1	Heat shock protein; transcript regulated by cAMP, osmotic stress, ciclopirox olamine, ketoconazole; repressed by Cyr1, Ras1; colony morphology-related regulated by Ssn6; stationary phase enriched; Hap43-induced; Spider biofilm induced	-3.21188	8.9533	6.61311e-14	3.54711e-12	true	-3.55719	8.9952	4.5563e-24	6.20029e-22	true	-4.26119	9.0097	7.71333e-28	7.10004e-26	true	1.66631	5.53071	5.62834e-10	6.94996e-08	false
orf19.2346		Putative protein of unknown function, transcription is positively regulated by Tbf1p	-1.28948	7.35416	2.6022e-05	0.000207802	false	-1.51786	7.363	1.57582e-07	1.62908e-06	false	-1.92904	7.32591	1.20756e-10	1.22185e-09	false	0.0774481	5.60727	0.765569	> 0.05	false
orf19.2347	MNN2	Alpha-1,2-mannosyltransferase; similar to S. cerevisiae Mnn2; role in cell wall integrity, temperature sensitivity; iron utilization in low iron; Tn mutation affects filamentous growth; filament induced; increased chitin exposes beta-glucan	-0.792226	6.4699	0.00566811	0.0206869	false	-0.639997	6.59958	0.0235834	> 0.05	false	-0.333545	6.78688	0.251447	> 0.05	false	-0.392652	6.88825	0.150647	> 0.05	false
orf19.2350		Protein similar to S. cerevisiae Yor378w; MFS family transporter; transposon mutation affects filamentous growth; null mutants are viable; fungal-specific (no human or murine homolog)	0.580789	3.92762	0.11913	> 0.05	false	0.433499	3.91343	0.245782	> 0.05	false	0.133235	3.80416	0.712857	> 0.05	false	0.613145	3.05258	0.0579582	> 0.05	false
orf19.2351	NIT3	Putative nitrilase; regulated by Gcn2p and Gcn4p; protein present in exponential and stationary growth phase yeast cultures	0.219649	7.80299	0.482834	> 0.05	false	-0.32352	7.60842	0.280974	> 0.05	false	-0.837096	7.46078	0.0054198	0.0129187	false	0.59104	6.52095	0.0597056	0.0129187	false
orf19.2352		Ortholog(s) have mitochondrion localization	-0.0645336	5.81075	0.822731	> 0.05	false	-0.174243	5.82982	0.543945	> 0.05	false	-0.466325	5.7578	0.101931	> 0.05	false	-0.268696	6.00629	0.287097	> 0.05	false
orf19.2356	CRZ2	C2H2 transcription factor; crz1 not crz2 null mutation suppresses fluconazole resistance of homozygous cka2 null; Rim101-repressed at pH 8; required for yeast cell adherence to silicone substrate; Spider biofilm induced	0.942927	3.00489	0.154428	> 0.05	false	2.36838	4.13425	0.000143917	0.000664111	true	3.82688	5.47484	3.28894e-10	3.13743e-09	true	0.650395	1.10258	0.209074	> 0.05	false
orf19.236	RPL9B	Ribosomal protein L9; repressed upon phagocytosis by murine macrophages; repressed by nitric oxide; protein levels decrease in stationary phase; Hap43-induced; Spider biofilm repressed	-0.54252	9.68324	0.0997805	> 0.05	false	-1.56599	9.42116	2.53911e-06	1.88959e-05	false	-0.988383	9.64902	0.0034729	0.0088017	false	-0.626103	10.8142	0.0248427	0.0088017	false
orf19.2360	URA2	Putative bifunctional carbamoylphosphate synthetase-aspartate transcarbamylase; flucytosine induced; macrophage/pseudohyphal-induced; 5'-UTR intron; flow model biofilm repressed	0.193509	7.19477	0.533769	> 0.05	false	-0.207086	7.0667	0.477932	> 0.05	false	0.575838	7.54284	0.0843144	> 0.05	false	-1.69223	9.21454	5.57746e-06	0.000132823	false
orf19.2361	SPT10	Ortholog(s) have histone acetyltransferase activity, sequence-specific DNA binding activity	0.474819	4.80526	0.113851	> 0.05	false	0.361643	4.81295	0.224566	> 0.05	false	0.137195	4.74843	0.661024	> 0.05	false	-0.0511808	5.08044	0.845029	> 0.05	false
orf19.2362		Putative 90S preribosome component; Hap43p-induced gene; possibly an essential gene, disruptants not obtained by UAU1 method	1.73875	3.16601	7.02907e-05	0.000480716	false	1.78176	3.27978	5.68582e-05	0.000288751	false	2.58472	3.97113	1.55412e-10	1.5398e-09	false	-1.65526	5.36454	2.0983e-06	6.58537e-05	false
orf19.2363		Ortholog(s) have thiosulfate sulfurtransferase activity and mitochondrion localization	-0.0922233	6.1356	0.751183	> 0.05	false	0.327513	6.42698	0.241328	> 0.05	false	0.444707	6.55199	0.118143	> 0.05	false	-0.394348	7.22255	0.149697	> 0.05	false
orf19.2364	MIS11	Predicted mitochondrial C1-tetrahydrofolate synthase precursor; putative protein of glycine catabolism; repressed by Efg1; fluconazole-induced; stationary phase enriched protein; rat catheter and Spider biofilm repressed	-1.24346	10.2705	0.000221602	0.00129618	false	-1.67471	10.2278	7.31871e-07	6.34471e-06	false	-1.96271	10.2227	6.00008e-08	3.9973e-07	false	-0.454222	9.82734	0.102634	> 0.05	false
orf19.2365	POL2	DNA polymerase epsilon; transcript induced by interaction with macrophage; transcript is regulated by Tup1; periodic mRNA expression, peak at cell-cycle G1/S phase	-0.595119	6.11189	0.0450103	> 0.05	false	-1.10873	5.99824	0.000130889	0.00061118	false	-0.0577124	6.48235	0.839911	> 0.05	false	-0.371736	6.81095	0.175104	> 0.05	false
orf19.2366		Has domain(s) with predicted DNA binding activity and role in DNA integration	3.28501	2.64379	2.41662e-09	5.59892e-08	false	3.55011	2.96359	1.38465e-11	3.63497e-10	false	4.98423	4.34108	5.79531e-31	7.02602e-29	true	3.36784	1.42408	8.27512e-10	9.8533e-08	false
orf19.2367		Putative protein of unknown function; Hap43-induced; repressed by Rim101; Spider biofilm induced	0.358604	4.09787	0.329115	> 0.05	false	0.762843	4.41236	0.0327097	> 0.05	false	0.568455	4.35209	0.0870328	> 0.05	false	-0.00635094	4.33615	0.991585	> 0.05	false
orf19.2368		Predicted component of U5 snRNP; Spider biofilm induced	0.363329	4.83635	0.222873	> 0.05	false	0.40081	4.93018	0.177563	> 0.05	false	0.391984	4.9837	0.175736	> 0.05	false	-0.49807	4.96722	0.0526259	> 0.05	false
orf19.2369		Ortholog(s) have ATP binding, DNA replication origin binding activity	-1.72933	5.86599	0.00101306	0.00484234	false	-1.54153	5.98192	0.00341618	0.0105949	false	-1.48512	6.05641	0.00470929	0.0114521	false	0.0665927	5.2428	0.79495	0.0114521	false
orf19.2369.1	ATX1	Putative cytosolic copper metallochaperone; flucytosine induced; Ssr1-repressed; rat catheter biofilm induced	-5.46021	9.91812	2.0563e-05	0.000168652	true	-5.55521	9.98846	1.58884e-05	9.4593e-05	true	-5.8234	10.0421	8.24466e-06	3.73982e-05	true	-0.119064	5.38331	0.654533	3.73982e-05	false
orf19.2370	DSL1	Protein similar to S. cerevisiae Dsl1p, which is a member of the t-SNARE complex of the endoplasmic reticulum	-0.842911	5.41027	0.00930081	0.0310555	false	-0.793676	5.49885	0.0133497	0.0341057	false	-0.849801	5.53818	0.00990325	0.0219385	false	0.619956	4.70769	0.0171316	0.0219385	false
orf19.2371		Putative Gag protein of retrotransposon Tca2; separated by a stop codon from Pol protein orf19.2372; likely translated as single polyprotein that includes Gag, reverse transcriptase, protease, and integrase; rat catheter biofilm repressed	-2.20153	8.3001	1.30867e-07	2.10778e-06	true	-2.33013	8.35	8.36933e-08	9.37927e-07	true	-3.19175	8.29689	8.61205e-13	1.16956e-11	true	0.259219	8.8646	0.34926	> 0.05	false
orf19.2372		Pol protein of retrotransposon Tca2; separated by a stop codon from Gag protein orf19.2371; likely translated as single polyprotein with Gag, reverse transcriptase, protease, and integrase; rat catheter biofilm repressed	-0.508676	7.80132	0.145535	> 0.05	false	-0.669435	7.80938	0.0458935	> 0.05	false	-0.437347	7.96228	0.207964	> 0.05	false	0.188822	8.95453	0.48772	> 0.05	false
orf19.2376		Has domain(s) with predicted catalytic activity, nucleic acid binding, zinc ion binding activity	2.16891	1.88627	0.00016896	0.0010242	false	1.86333	1.74204	0.0022683	0.00749878	false	1.63675	1.61313	0.004317	0.0105947	false	-0.901747	0.638052	0.150976	0.0105947	false
orf19.2378		Ortholog(s) have role in vacuolar proton-transporting V-type ATPase complex assembly and integral to endoplasmic reticulum membrane localization	-0.214867	4.30696	0.514384	> 0.05	false	-0.627217	4.19707	0.0655991	> 0.05	false	-0.472078	4.32208	0.133013	> 0.05	false	-0.407057	4.45571	0.142767	> 0.05	false
orf19.2379	NOT4	Putative E3 ubiquitin-protein ligase; required for maintenance, but not induction, of hyphal development; homozygous null mutant is avirulent in mouse systemic infection despite persistence in host; repressed in rat oral candidiasis	-0.302234	6.91802	0.303657	> 0.05	false	-0.182611	7.04521	0.523515	> 0.05	false	-0.506565	6.96069	0.0846344	> 0.05	false	-0.12814	6.82243	0.634031	> 0.05	false
orf19.238	CCP1	Cytochrome-c peroxidase N terminus; Rim101, alkaline pH repressed; induced in low iron or by macrophage interaction; oxygen-induced activity; regulated by Sef1, Sfu1, and Hap43; Spider biofilm induced; rat catheter biofilm repressed	0.0409291	10.1852	0.911312	> 0.05	false	-0.372499	10.0629	0.370568	> 0.05	false	-1.05107	9.86379	0.00760171	0.0173947	false	0.77199	9.52996	0.00802398	0.0476862	false
orf19.2381		Protein of unknown function; possibly an essential gene, disruptants not obtained by UAU1 method	0.0560873	5.3673	0.851705	> 0.05	false	0.079465	5.45139	0.794473	> 0.05	false	-0.135603	5.40337	0.68367	> 0.05	false	0.532861	5.4422	0.0437448	> 0.05	false
orf19.2382		Protein similar to isoleucyl-tRNA synthetase; isoleucyl-tRNA synthetase is the target of drugs including the cyclic beta-amino acid icofungipen/PLD-118/BAY-10-8888 and mupirocin	-0.734382	5.93898	0.0124691	0.0397626	false	-0.760332	6.00042	0.00828622	0.0228128	false	0.134331	6.46132	0.644804	> 0.05	false	-0.131688	6.76892	0.631781	> 0.05	false
orf19.2383	YKU80	Yku70p-Yku80p Ku complex subunit involved in nonhomologous end joining during double-strand break repair repair; Hap43-repressed gene; flow model biofilm induced	-0.443858	5.45498	0.148189	> 0.05	false	-1.0492	5.29689	0.000281241	0.00120338	false	-0.858384	5.42292	0.00262384	0.00683695	false	0.0794438	4.81698	0.767117	0.00683695	false
orf19.2384	MTG1	Putative mitochondrial GTPase; likely essential for respiratory competence and in large ribosomal subunit assembly; mitochondrial translation; Spider biofilm induced	1.46317	2.32131	0.0011779	0.00548478	false	2.07512	2.86238	1.902e-06	1.46789e-05	false	2.97598	3.65769	3.76698e-14	6.27956e-13	false	-1.18878	5.38989	5.31062e-05	0.000837145	false
orf19.2385	KTI12	Protein similar to S. cerevisiae Kti12p, which associates with Elongator complex; has a role in resistance to killer toxin; predicted Kex2p substrate; Hap43p-induced gene	1.5965	2.28153	0.00269213	0.011013	false	1.77767	2.49747	0.000680547	0.00263677	false	3.34344	3.82433	1.59837e-13	2.45575e-12	false	-1.6373	5.88402	4.15828e-06	0.000107471	false
orf19.2386		Ortholog(s) have role in endonucleolytic cleavage in 5'-ETS of tricistronic rRNA transcript (SSU-rRNA, 5.8S rRNA and LSU-rRNA), more	0.625306	3.63606	0.141893	> 0.05	false	0.700012	3.75507	0.0974491	> 0.05	false	1.66559	4.47934	2.86122e-05	0.000116832	false	-1.40503	6.00124	2.31933e-05	0.000409135	false
orf19.2387		Putative tRNA-Pro synthetase; genes encoding ribosomal subunits, translation factors, and tRNA synthetases are downregulated upon phagocytosis by murine macrophage	-0.205506	5.85424	0.475302	> 0.05	false	0.0934336	6.07358	0.749329	> 0.05	false	0.592331	6.41194	0.0462636	> 0.05	false	-0.754233	6.77983	0.00487805	0.0325594	false
orf19.2389		Ortholog(s) have DNA replication origin binding, single-stranded DNA binding activity	-0.156135	3.95115	0.669317	> 0.05	false	-0.363377	3.9249	0.321233	> 0.05	false	-0.512287	3.92187	0.129241	> 0.05	false	-0.236191	4.1495	0.423703	> 0.05	false
orf19.239		Putative ATP-dependent helicase; induced by nitric oxide	-0.0347966	7.57567	0.909614	> 0.05	false	0.0726453	7.70231	0.811883	> 0.05	false	-0.100946	7.67442	0.748602	> 0.05	false	-0.162175	8.0585	0.55699	> 0.05	false
orf19.2391		Putative protein of unknown function; Hap43p-repressed gene; S. cerevisiae ortholog YKR023W localizes to mitochondria	-0.158251	5.79708	0.594962	> 0.05	false	-0.370673	5.77154	0.218532	> 0.05	false	-0.828151	5.64677	0.00739164	0.0169606	false	0.284312	4.80782	0.277169	0.0169606	false
orf19.2392		Protein of unknown function; mutants are viable	-0.839657	0.458911	0.267746	> 0.05	false	-0.0447902	0.820189	1	> 0.05	false	-0.757845	0.607272	0.234251	> 0.05	false	-0.79004	0.351259	0.148088	> 0.05	false
orf19.2393		Putative transcription factor with zinc finger DNA-binding motif	-0.533411	5.58	0.058752	> 0.05	false	-0.393803	5.71054	0.161296	> 0.05	false	-0.69119	5.64731	0.0201442	0.0406296	false	-0.637258	5.40847	0.0148814	0.0406296	false
orf19.2394		Ortholog(s) have cytoplasm, nucleus localization	1.97885	1.48527	0.000654361	0.00330802	false	1.64424	1.32062	0.0063892	0.0182689	false	2.32087	1.89233	2.77117e-06	1.37384e-05	false	1.61158	-0.429045	0.0300999	1.37384e-05	false
orf19.2395	IME2	Putative serine/threonine protein kinase; mutation confers hypersensitivity to amphotericin B	2.83243	1.86868	2.40568e-07	3.54892e-06	false	3.64427	2.64926	5.38342e-09	8.36752e-08	false	3.4213	2.49986	1.8684e-11	2.1333e-10	false	0.369554	0.58754	0.525963	> 0.05	false
orf19.2396	IFR2	Zinc-binding dehydrogenase; induced by benomyl, ciclopirox olamine, alpha pheromone, Hap43; regulated by oxidative stress via Cap1, osmotic stress via Hog1; protein present in exponential and stationary phase; rat catheter biofilm repressed	-0.801016	8.64137	0.0120324	0.0386659	false	-0.901224	8.67798	0.0118964	0.0309622	false	-1.16296	8.65058	0.000664651	0.0020072	false	0.457529	7.7193	0.107064	0.0020072	false
orf19.2397		Predicted membrane transporter, member of the anion:cation symporter (ACS) family, major facilitator superfamily (MFS); amphotericin B, caspofungin repressed; Hap43p-repressed	0.594842	3.15639	0.175591	> 0.05	false	1.00107	3.49167	0.0245425	> 0.05	false	1.31188	3.75613	0.0012747	0.003597	false	-1.24064	5.0587	0.000783866	0.00756413	false
orf19.2397.3		Putative aminotransferase; Hap43-repressed; homozygous Tn insertion decreases colony wrinkling in filament-inducing conditions, does not block true hypha formation in liquid media; rat catheter and Spider biofilm induced	-0.235051	5.87697	0.408713	> 0.05	false	-0.79668	5.71511	0.00440328	0.0131938	false	-1.61865	5.52223	5.09916e-08	3.4449e-07	false	0.258954	3.71325	0.428585	> 0.05	false
orf19.2398		Protein of unknown function; Hap43-repressed; transcript increased in azole-resistant strain overexpressing CDR1 and CDR2; possibly regulated by Tac1; induced by Mnl1 in weak acid stress; flow model biofilm induced; Spider biofilm induced	1.01796	5.65627	0.00885778	0.029785	false	1.05991	5.75741	0.0049833	0.014716	false	0.627254	5.53735	0.106321	> 0.05	false	0.407366	4.36649	0.146908	> 0.05	false
orf19.2399		Putative transcription factor with zinc finger DNA-binding motif; similar to bacterial DnaJ; induced in low iron	0.26569	4.73006	0.388546	> 0.05	false	0.4764	4.92206	0.100971	> 0.05	false	0.699516	5.11464	0.0145901	0.0307093	false	0.123703	5.09134	0.628595	0.0307093	false
orf19.24	RTA2	Flippase; sphingolipid long chain base release; mediates calcineurin-dependent resistance to azoles; stress-associate; Plc1, Ca2+, calcineurin-regulated; ketoconazole, caspofungin induced; Spider biofilm induced; flow biofilm repressed	4.17875	8.81614	4.60516e-22	8.08084e-20	true	4.80604	9.48926	2.83849e-25	4.61636e-23	true	4.43809	9.19441	8.34416e-23	4.83816e-21	true	0.325765	5.71495	0.30994	> 0.05	false
orf19.240	PAM17	Predicted component of the presequence translocase-associated import motor (PAM complex) involved in protein import into mitochondrial matrix	-0.14654	5.69277	0.630888	> 0.05	false	0.144423	5.91098	0.611109	> 0.05	false	0.550751	6.19735	0.0604584	> 0.05	false	-0.426086	7.0938	0.117574	> 0.05	false
orf19.2400		Ortholog(s) have role in mRNA splicing, via spliceosome, maturation of SSU-rRNA, positive regulation of ATPase activity, positive regulation of helicase activity	-0.780417	6.66302	0.00658369	0.0233884	false	-0.965116	6.66908	0.00063614	0.00248424	false	-1.15688	6.66568	6.7925e-05	0.000256034	false	-0.360032	5.27054	0.169621	0.000256034	false
orf19.2401		Ortholog(s) have cysteine-type endopeptidase activity	-0.193957	4.18681	0.599421	> 0.05	false	0.0468953	4.37648	0.892888	> 0.05	false	-0.340478	4.24994	0.334578	> 0.05	false	0.645503	3.20085	0.0543734	> 0.05	false
orf19.2402	SSU72	Ortholog(s) have CTD phosphatase activity, protein tyrosine phosphatase activity	-0.491404	4.79309	0.098767	> 0.05	false	-0.352919	4.92357	0.22628	> 0.05	false	-0.50568	4.91696	0.0828773	> 0.05	false	-0.217861	4.87724	0.399361	> 0.05	false
orf19.2404		Ortholog(s) have ribonuclease MRP activity, ribonuclease P activity, role in intronic box C/D snoRNA processing, mRNA cleavage, rRNA processing, tRNA processing and nucleolar ribonuclease P complex localization	0.198476	4.87963	0.505542	> 0.05	false	0.299363	5.00704	0.309912	> 0.05	false	0.492776	5.17559	0.0950435	> 0.05	false	-1.23241	6.20832	4.96419e-05	0.000788124	false
orf19.2406		Ortholog(s) have role in microautophagy, positive regulation of transcription from RNA polymerase II promoter and EGO complex, cytosol, fungal-type vacuole membrane, late endosome membrane, nuclear chromatin localization	-0.0160176	5.41272	0.960843	> 0.05	false	-0.174882	5.40718	0.541537	> 0.05	false	-0.314448	5.40174	0.268817	> 0.05	false	-0.0513484	5.62186	0.844037	> 0.05	false
orf19.2407	DPS1-1	Putative tRNA-Asp synthetase; genes encoding ribosomal subunits, translation factors, tRNA synthetases are downregulated upon phagocytosis by murine macrophage; protein enriched in stationary phase yeast cultures	-0.590468	8.71112	0.0648757	> 0.05	false	-1.1988	8.57015	0.000165082	0.000750354	false	-1.03988	8.67905	0.00152983	0.00423449	false	-0.412074	9.12589	0.131746	0.00423449	false
orf19.2408		Ortholog(s) have tRNA methyltransferase activity, role in tRNA methylation, wybutosine biosynthetic process and cytosol, nucleus localization	1.11425	3.70561	0.0088021	0.0296426	false	1.46757	4.03141	0.00318602	0.00995519	false	2.66102	5.03195	4.9363e-16	1.07566e-14	true	-0.216702	4.28775	0.444321	> 0.05	false
orf19.2410	SYS3	Protein similar to S. cerevisiae Sys3p; putative role in endosome-Golgi vesicle docking; upregulated in biofilm; induced upon adherence to polystyrene	0.0854359	6.91048	0.776714	> 0.05	false	0.288582	7.09131	0.322097	> 0.05	false	-0.0829954	6.95704	0.775786	> 0.05	false	0.12987	6.69509	0.630532	> 0.05	false
orf19.2411	SYN8	Putative endosomal SNARE; role in protein transport; rat catheter and Spider biofilm induced	-0.418427	4.86683	0.192582	> 0.05	false	-0.381782	4.95349	0.229675	> 0.05	false	-0.823085	4.83458	0.0116232	0.0252373	false	0.251943	3.71841	0.404345	0.0252373	false
orf19.2412		Ortholog(s) have role in late endosome to vacuole transport via multivesicular body sorting pathway and Golgi apparatus, Vps55/Vps68 complex, fungal-type vacuole membrane, late endosome localization	0.140384	4.93575	0.638471	> 0.05	false	0.0966288	4.98485	0.74682	> 0.05	false	-0.306537	4.84819	0.342085	> 0.05	false	0.332878	4.78493	0.209354	> 0.05	false
[truncated: 5,424 more rows]

## Sheet: STable_4B
Gene description			15' after PMN infection [hyphal form]					30' after PMN infection [hyphal form]					60' after PMN infection [hyphal form]					30' after NET incubation [hyphal form]
[truncated: 6,669 more rows]

[truncated: 1 more sheets: Stable_4C]
